# Supplementary material
Source: PubMed Central journal article supplement (PMC2148401)

A.

| Cell Line | Organ | Compound  | Low<br>(0.02 $\mu$ M) | Med.<br>(0.2 $\mu$ M) | High<br>(2 $\mu$ M) |
|-----------|-------|-----------|-----------------------|-----------------------|---------------------|
| LN-18     | Brain | Sorafenib | 0.82                  | 0.43                  | 0.01                |
| LN-18     | Brain | AZ628     | 0.88                  | 0.91                  | 0.88                |

| Cell Line | Cell viability | NRAS mutation | Tumor type |
|-----------|----------------|---------------|------------|
| SK-MEL-30 | 0.18           | Q61K          | Melanoma   |
| IPC-298   | 0.58           | Q61L          | Melanoma   |
| NCI-H2087 | 0.67           | Q61K          | Lung:NSCLC |
| MEL-JUSO  | 0.68           | Q61L          | Melanoma   |
| TYK-nu    | 0.74           | Q61K          | Ovarian    |
| NCI-H2347 | 0.77           | Q61R          | Lung:NSCLC |
| NCI-H1299 | 0.86           | Q61K          | Lung:NSCLC |
| HMCB      | 0.90           | Q61R          | Melanoma   |

Fraction of Control

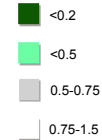

B.

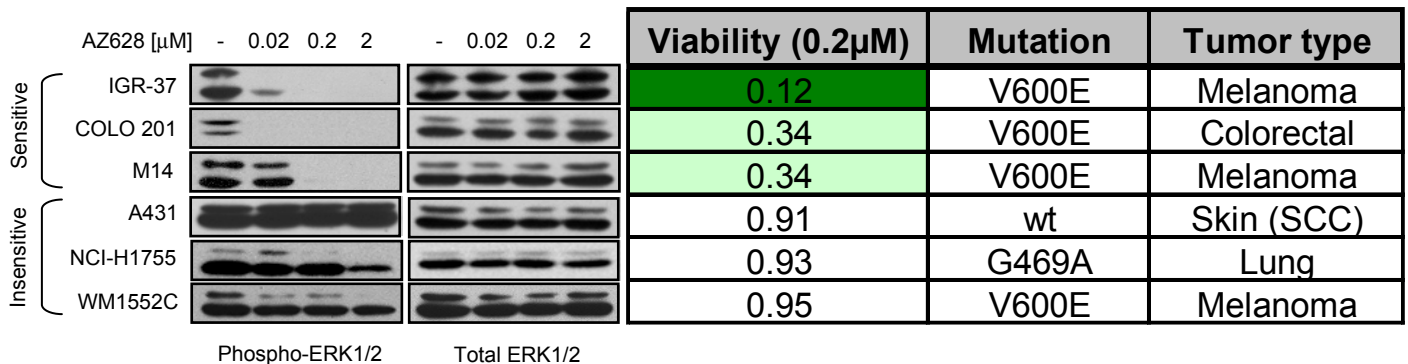

C.

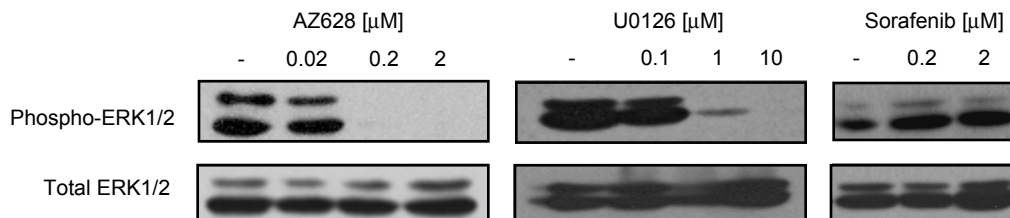

Supplement: pnas_0707498104_4.pdf [file pnas_0707498104_4.pdf]
