# Supplementary material
Source: PubMed Central journal article supplement (PMC2148401)
Supplement: pnas_0707498104_7.pdf [file pnas_0707498104_7.pdf]

Table 1. Targets of the 14 protein kinase inhibitors used to screen 500 human cancer cell lines, including chemical structures, enzymatic and cellular IC50 values, potential "off-targets" and relevant references to published literature.

| No | Name        | Structure                                                                                           | Kinase Targets                                                                                                                                                                                                                                                                                                                                                                                                                                                                                                              | Known off-targets                                                                                                                                                                                                                                                                                                                                                                                                                                                                                                                                                                                                                                                                                                                                                                                                                                          | Not Active IC50>10uM                                                                                                                                                                        | Literature                                                                                                                                                                                  |
|----|-------------|-----------------------------------------------------------------------------------------------------|-----------------------------------------------------------------------------------------------------------------------------------------------------------------------------------------------------------------------------------------------------------------------------------------------------------------------------------------------------------------------------------------------------------------------------------------------------------------------------------------------------------------------------|------------------------------------------------------------------------------------------------------------------------------------------------------------------------------------------------------------------------------------------------------------------------------------------------------------------------------------------------------------------------------------------------------------------------------------------------------------------------------------------------------------------------------------------------------------------------------------------------------------------------------------------------------------------------------------------------------------------------------------------------------------------------------------------------------------------------------------------------------------|---------------------------------------------------------------------------------------------------------------------------------------------------------------------------------------------|---------------------------------------------------------------------------------------------------------------------------------------------------------------------------------------------|
| 1  | Erlotinib   | 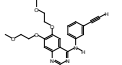<br>Chemistry 1    | EGFR (enzyme IC50 = 0.4nM), ErbB2 (enzyme IC50 = 870nM), ErbB4 (enzyme IC50 = 1130nM)                                                                                                                                                                                                                                                                                                                                                                                                                                       | Abl (Kd=770 nM), EphA6 (Kd=930 nM), Gak (Kd=40 nM), Lck (Kd=530nM), RIPK (Kd=410 nM), STK10 (Kd=83 nM), ULK (Kd=630nM)                                                                                                                                                                                                                                                                                                                                                                                                                                                                                                                                                                                                                                                                                                                                     |                                                                                                                                                                                             | Nature Biotechnology, 2005, v23, No. 3, 2005, p329. Cancer Research, 64, 6652-659, 2004.                                                                                                    |
| 2  | PHA665752   | <br>Chemistry 2    | c-Met (enzyme IC50 = 9 nM; cellular EC50 = 42 nM), Ron (enzyme IC50 68 nM; cellular EC50 = 900 nM)                                                                                                                                                                                                                                                                                                                                                                                                                          | Fli-1 (enzyme IC50 200 nM, cellular EC50 = 2.5 uM), c-Abl (enzyme IC50= 1.4uM), FGFR1 (enzyme IC50 3 uM); EGFR (enzyme IC50 3.8 uM), c-Src (enzyme IC50 6 uM)                                                                                                                                                                                                                                                                                                                                                                                                                                                                                                                                                                                                                                                                                              | IC50>10 u for IGF-1R, PDGFR, Aurora2, PKA, PKB, Cdk2, p38alpha, MK2,3, PKC, MAPK, GSK3beta, CAMK                                                                                            | Cancer Research, 2003 Nov 1;63(21):7345-55.                                                                                                                                                 |
| 3  | CL-387,785  | <br>Chemistry 13   | EGFR (EC50 cellular = 50 nM), L858R EGFR (cellular EC50 < 300nM), L858R/T790M (cellular EC50 = 1 uM)                                                                                                                                                                                                                                                                                                                                                                                                                        | None Reported                                                                                                                                                                                                                                                                                                                                                                                                                                                                                                                                                                                                                                                                                                                                                                                                                                              |                                                                                                                                                                                             | Biochemical Pharmacology, Vol 57, p917-925, 1999; Cancer Research 2005; 65: (16)                                                                                                            |
| 4  | HKI-272     | <br>Chemistry 12   | EGFR (IC50 enzyme 92 nM), Her-2 (IC50 enzyme 59 nM), cellular EC50 (SK-BR-3 2nM, BT 474 2nM, A431 81nM, SW620 690nM)                                                                                                                                                                                                                                                                                                                                                                                                        | None reported                                                                                                                                                                                                                                                                                                                                                                                                                                                                                                                                                                                                                                                                                                                                                                                                                                              |                                                                                                                                                                                             | J. Med. Chem. 2005, 48, 1107-1131. Cancer Research, 64, 3958-3965.                                                                                                                          |
| 5  | Sunitinib   | <br>Chemistry 11   | PDGFR (IC50 enzyme = 3 nM), VEGFR2 (IC50 enzyme = 27 nM), FGFR1 (IC50 enzyme= 170 nM), Kit family members (enzyme IC50 ~ 10 - 500 nM).                                                                                                                                                                                                                                                                                                                                                                                      | AAK (Kd=130nM), Abl (Kd=870 nM), Aurora C (Kd=310 nM), BIKE (Kd=38 nM), CAMK2A (Kd=370 nM), CAMK2g (Kd=760 nM), CLK1 (Kd=100 nM), CLK2 (Kd=190 nM), CLK4 (Kd=80nM), DAPK2 (Kd=470 nM), DAPK3 (Kd=300nM), EphA7 (Kd=710 nM), EphB1 (Kd=960 nM), FGFR2 (Kd=530nM), FGFR2 (Kd=300nM), FGR (Kd=290nM), FLT3 (Kd=0.8 nM), FLT4 (Kd=35nM), GAK (Kd=120nM), InsR (Kd=180 nM), Jak1 (Kd=9 nM), Kit (Kd=0.7 nM), Lyn (Kd=540nM), MAP4K5 (Kd=77nM), MYLK2 (Kd=57nM), Nek2 (Kd=500 nM), NTRK1 (Kd=220nM), PCTK1 (Kd=130 nM), PDGFRb (Kd=0.2 nM), PHKG1 (Kd=70 nM), PGHK2 (Kd=39 nM), PRKAA1 (Kd=52 nM), PTK2 (Kd=610 nM), RPSKA2 (Kd=58 nM), RPSKA3 (Kd=55 nM), RPSKA5 (Kd=250 nM), SLK (Kd=81nM), STK10 (Kd=640 nM), STK16 (Kd=360 nM), STK17a (Kd=21 nM), STK17b (Kd=220 nM), STK18 (Kd=380nM), STK4 (Kd=100 nM), TNIK (Kd=25 nM), TTK (Kd=230 nM), KDR (Kd=0.2 nM) |                                                                                                                                                                                             | Heryanto, B., et al. 2003. Reproduction 125, 334. Sun, L., et al. 2003. J. Med. Chem. 46, 1116. Liao, A.T., et al. 2002. Blood 100, 585. Nature Biotechnology, 2005, v23, No. 3, 2005, p329 |
| 6  | AZ628       | Structure Not disclosed                                                                             | Not reported - putatively Raf-selective                                                                                                                                                                                                                                                                                                                                                                                                                                                                                     |                                                                                                                                                                                                                                                                                                                                                                                                                                                                                                                                                                                                                                                                                                                                                                                                                                                            |                                                                                                                                                                                             |                                                                                                                                                                                             |
| 7  | AZD05030    | <br>Chemistry 3    | Src (IC50, enzyme=3 nM)                                                                                                                                                                                                                                                                                                                                                                                                                                                                                                     | Csk (IC50, enzyme=840 nM); c-Yes (IC50, enzyme= 4 nM), Lck (IC50, enzyme= 4 nM), c-Abl (IC50, enzyme= 30 nM), c-Kit (IC50, enzyme= 200 nM), EGFR (IC50, enzyme= 2590 nM)                                                                                                                                                                                                                                                                                                                                                                                                                                                                                                                                                                                                                                                                                   | Fli-1, Fli-4, FGFR-1, MEK, Aurora-#, Cdk2, PDGFA,b, MAPPKK, GSK3b, Chk, JNK, PDK, PKA, PKCa, PI3K                                                                                           | Breast Cancer Res Treat. 2006 Jun;97(3):263-74; Inhibitors of growth factor signalling. J. Med. Chem. 2006, 49, 6465-6488 (kinase selectivity)                                              |
| 8  | Compound 14 | <br>Chemistry 4    | Bcr-abl (EC50, cell = 3nM), Bmx (EC50, cell = 30 nM), EphA3 (EC50, cell = 2nM), Eph B4 (EC50, cell = 4nM), FGFR1 (EC50, cell = 80nM), Fli1 (EC50, cell = 236nM), KDR (EC50, cell = 22nM), c-Kit (EC50, cell = 4 nM), Lck (EC50, cell = 5 nM), PDGFRa (EC50, cell = 4 nM), PDGFRb (EC50, cell = 6 nM), Ret (EC50, cell = 77 nM), Src (EC50, cell = 13 nM), Syk (EC50, cell = 71 nM), Tie2 (EC50, cell = 200 nM), TrkC (EC50, cell = 30 nM), Bmx (IC50 enzyme= 1.4 nM), FGFR3 (IC50 enzyme = 13 nM), Fes (IC50 enzyme = 1 nM) |                                                                                                                                                                                                                                                                                                                                                                                                                                                                                                                                                                                                                                                                                                                                                                                                                                                            | cellular EC50>2000 nM for ALK, FLT3, InsR, Met, Ron, TrkA, Tyk2, Zap-70                                                                                                                     | Chemistry & Biology, 13, 779-786, 2006 (inhibitor 14 in manuscript)                                                                                                                         |
| 9  | MK-0457     | <br>Chemistry 5   | Aurora A, B, C (Ki enzyme=0.6, 18 and 4.6 nM), FLT-3 (enzyme IC50= 30 nM)                                                                                                                                                                                                                                                                                                                                                                                                                                                   |                                                                                                                                                                                                                                                                                                                                                                                                                                                                                                                                                                                                                                                                                                                                                                                                                                                            | "Selective" against 55 other kinases"                                                                                                                                                       | Nature Medicine, 10, 3, 2004, p262                                                                                                                                                          |
| 10 | Sorafenib   | <br>Chemistry 10 | B-raf (IC50 enzyme = 200 nM, EC50 cellular = 3 uM), KDR (EC50 cellular 500 nM)                                                                                                                                                                                                                                                                                                                                                                                                                                              | Abl (Kd=130 nM), EphA5 (Kd=360 nM), EphA6 (Kd=240 nM), EphA7 (Kd=670 nM), EphA8 (Kd=960nM), FLT3 (Kd=20 nM), FLT4 (Kd=16nM), Frk (Kd=440nM), Kit (Kd=740nM), p38alpha (Kd=260 nM), p38beta (Kd=200 nM), PDGFRbeta (Kd=41nM), STK10 (Kd=140 nM), VEGFR1/2 (Kd=93 nM)                                                                                                                                                                                                                                                                                                                                                                                                                                                                                                                                                                                        |                                                                                                                                                                                             | Endocrine-Related Cancer, 2001, 8, 219-225; Nature Biotechnology, 2005, v23, No. 3, 2005, p329                                                                                              |
| 11 | Imatinib    | <br>Chemistry 9  | Bcr-abl (EC50 cell= 200 nM), PDGFRa (EC50 cell = 90 nM), c-Kit (EC50 cell = 100 nM),                                                                                                                                                                                                                                                                                                                                                                                                                                        | DDR1 (EC50 cellular < uM , IC50 enzyme =31) ,DDR (EC50 cellular ND, IC50 enzyme =112 nM)                                                                                                                                                                                                                                                                                                                                                                                                                                                                                                                                                                                                                                                                                                                                                                   | Extensively profiled on biochemical and cellular panels of 100s of kinases                                                                                                                  | Nat Biotechnol. 2007 25(9):1035-44-2007                                                                                                                                                     |
| 12 | NVP-TAE684  | <br>Chemistry 8  | ALK (EC50 cell = 3 nM)                                                                                                                                                                                                                                                                                                                                                                                                                                                                                                      | InsR (EC50 cellular = 1 uM, IC50 enzyme = 20 nM), IGF1R (EC50 cellular ?) FLT3 (EC50 cellular = 500 nM, IC50 enzyme = 3 nM), FLT-1 (EC50 cellular 872 nM), Tie 2 (EC50 cellular 1,167 nM, IC50 enzyme 12 nM), Syk (EC50 cellular 1,474 nM, IC50 =286 nM)                                                                                                                                                                                                                                                                                                                                                                                                                                                                                                                                                                                                   | EC50 cellular > 1 uM for: Bcr-abl , Bmx , EphA3, Eph B4 , FGFR1 , KDR , c-Kit , Lck , PDGFRa , PDGFRb , Ret, Src , TrkC, Bmx, FGFR3, Fes                                                    | Proc Natl Acad Sci U S A. 2007 Jan 2;104(1):270-5. 2006                                                                                                                                     |
| 13 | PD-173074   | <br>Chemistry 7  | FGFR1 (EC50 cellular = 21 nM, IC50 enzyme = 30 nM), VEGFR1 (EC50 cellular 250 nM)                                                                                                                                                                                                                                                                                                                                                                                                                                           | FGFR3 (cellular EC50 =30 nM), FGFR4                                                                                                                                                                                                                                                                                                                                                                                                                                                                                                                                                                                                                                                                                                                                                                                                                        | IC50 > 50 uM in enzyme assays for EGFR, InsR, Mek, PKC, Src (IC50 enzyme = 20 uM), PDGF (IC50 enzyme = 19 uM)                                                                               | Blood. 2004 May 1;103(9):3521-8. 2004; EMCO Journal, Vol. 17, No. 20, 5869-5904, 1998                                                                                                       |
| 14 | PF2341066   | <br>Chemistry 6  | c-Met (IC50 enzyme 8 nM), ALK (IC50 enzyme 20 nM), Ron (IC50 enzyme 300nM),                                                                                                                                                                                                                                                                                                                                                                                                                                                 | Axl(IC50 enzyme 294 nM), Tie2 (IC50 enzyme 448 nM), TrkA (IC50 enzyme 580 nM), Trk B (IC50 enzyme 399 nM), Abl (IC50 enzyme 1159 nM), IRK (IC50 enzyme 2887 nM), Lck (IC50 enzyme 2741 nM)                                                                                                                                                                                                                                                                                                                                                                                                                                                                                                                                                                                                                                                                 | IC50>10 uM, Sky, VEGFR1, PDGFRbeta, Fms, EphB4, Bmx, EphB2, Fgr, Fyn, Cdk7/cyclinH/Mat1, cSrc, IGF1-R, Aurora-A, Syk, FGFR3, PKCu, BTK, Cdk1/cyclinB, p70S6K, PRK2, RAR, 1beta, PKbeta, Fes | Poster AACR, Abstract LB-271, Pfizer Global Research                                                                                                                                        |
