# Supplementary material
Source: PubMed Central journal article supplement (PMC2148401)
Supplement: pnas_0707498104_9.pdf [file pnas_0707498104_9.pdf]

Table 3. Correlation among EGFR copy number, presence of EGFR mutations and sensitivity to erlotinib in 380 cancer cell lines.

| Cell Line | Organ       | EGFR Copy no | EGFR mutation | Erlotinib sensitive |
|-----------|-------------|--------------|---------------|---------------------|
| OE21      | Esophagus   | 10.11        | Wild-type     | Yes                 |
| KYSE-520  | Esophagus   | 8.89         | Wild-type     | Yes                 |
| H3255     | Lung        | 8.77         | L858R         | Yes                 |
| HSC-2     | Head & Neck | 7.71         | Unknown       | Yes                 |
| NCI-H1573 | Lung        | 7.28         | Unknown       | No                  |
| HCC-827   | Lung        | 6.70         | E746 delA750  | Yes                 |
| Hs 852.T  | Skin        | 6.64         | Unknown       | Unknown             |
| BT-20     | Breast      | 6.55         | Unknown       | Unknown             |
| KYSE-30   | Esophagus   | 6.29         | Unknown       | No                  |
| Ca9-22    | Head & Neck | 5.66         | Unknown       | Yes                 |
| NCI-H1568 | Lung        | 5.13         | Unknown       | No                  |
| A431      | Skin        | 4.50         | Wild-type     | Yes                 |
| PC-9      | Lung        | 4.27         | E746 delA750  | Yes                 |
| KYSE-450  | Esophagus   | 4.13         | S768I         | Yes                 |

The 14 cell lines with the highest EGFR copy number are shown (\* copy numbers were estimated from SNP array profiles).
