# Supplementary material
Source: PubMed Central journal article supplement (PMC2148401)
Supplement: pnas_0707498104_10.pdf [file pnas_0707498104_10.pdf]

Table 4. Sensitivity of a panel of 500 human cancer cell lines to 200nM MET tyrosine kinase inhibitor PHA-665752 after 72 hours.

| Cell Line | Organ     | Cell Viability | MET Copy* |
|-----------|-----------|----------------|-----------|
| Hs 746T   | Stomach   | 0.35           | 9.9       |
| NCI-H1993 | Lung      | 0.42           | 8.7       |
| NCI-H1573 | Lung      | 0.93           | 6.9       |
| MKN45     | Stomach   | 0.25           | 6.5       |
| EBC-1     | Lung      | 0.18           | 6.5       |
| KATO II   | Stomach   | 0.33           | 6.3       |
| GTL-16    | Stomach   | 0.30           | 6.1       |
| OE33      | Esophagus | 0.53           | 6.1       |
| SNU-5     | Stomach   | 0.41           | 5.8       |
| C32       | Melanoma  | 0.96           | 4.4       |
| SK-BR-3   | Breast    | 1.05           | 4.2       |
| H3255     | Lung      | 0.97           | 3.4       |
| NUGC-4    | Stomach   | 1.01           | 3.3       |
| NCI-H441  | Lung      | 0.93           | 3.0       |

The top 14 cell lines are ranked according to MET gene copy number (\* copy numbers were estimated from SNP array profiles).
