# Supplementary material
Source: PubMed Central journal article supplement (PMC2148401)
Supplement: pnas_0707498104_11.pdf [file pnas_0707498104_11.pdf]

Table 5. EGFR, MET and BRAF primer sequences.

**PCR Primers:**

| Designation | Primer Sequence (5'3')     | Orientation |
|-------------|----------------------------|-------------|
| 18F         | CAAGTGCCGTGTCCTGGCACCCAAGC | SENSE       |
| 19F         | GCAATATCAGCCTTAGGTGCGGCTC  | SENSE       |
| 20F         | CCATGAGTACGTATTTTGAAACTC   | SENSE       |
| 21F         | CTAACGTTCCGACGCCATAAGTCC   | SENSE       |
| 22F         | GAGCAGCCCTGAACTCCGTCAGACTG | SENSE       |
| 23F         | CAGGACTACAGAAATGTAGTTTC    | SENSE       |
| 24F         | GACTGGAAGTGTGCGATACCAATG   | SENSE       |
| 18R         | CCAAACACTCAGTGAAACAAAGAG   | ANTISENSE   |
| 19R         | CATAGAAAGTGAACATTTAGGATGTG | ANTISENSE   |
| 20R         | CATATCCCCATGGCAAACCTTGC    | ANTISENSE   |
| 21R         | GCTGCGAGCTCACCCAGAATGTCTGG | ANTISENSE   |
| 22R         | CTCAGTACAATAGATAGACAGCAATG | ANTISENSE   |
| 23R         | GTGCCTGCCTTAAGTAATGTGATGAC | ANTISENSE   |
| 24R         | GGTTTAATAATGCGATCTGGGACAC  | ANTISENSE   |

**EGFR Sequencing Primers:**

|                                                                    |                            |           |
|--------------------------------------------------------------------|----------------------------|-----------|
| 18F.SEQ                                                            | GCACCCAAGCCCATGCCGTGGCTGC  | SENSE     |
| 19F.SEQ                                                            | CCTTAGGTGCGGCTCCACAGC      | SENSE     |
| 20F.SEQ                                                            | GAAACTCAAGATCGCATTTCATGC   | SENSE     |
| 21F.SEQ                                                            | CGTGGAGAGGCTCAGAGCCTGGCATG | SENSE     |
| 18R.SEQ                                                            | GAAACAAAGAGTAAAGTAGATGATGG | ANTISENSE |
| 19R.SEQ                                                            | CATTTAGGATGTGGAGATGAGC     | ANTISENSE |
| 20R.SEQ                                                            | GCAAACCTTGCTATCCCAGGAG     | ANTISENSE |
| 21R.SEQ                                                            | CATCCTCCCCTGCATGTGTTAAAC   | ANTISENSE |
| For exons 22,23,24 sequencing primers are identical to PCR primers |                            |           |

**MET Sequencing Primers:**

| Designation | Primer Sequence (5'-3')    | Orientation |
|-------------|----------------------------|-------------|
| 15F         | GCTTTCAAAATTAATACTTAGTCTAC | SENSE       |
| 16F         | GTACTCTTTTGCTGTATAGAAAG    | SENSE       |
| 17F         | CAAGATGCTAACTGTGTGGTTTACC  | SENSE       |
| 18F         | GACCAAATAATTTTTGAGACAAG    | SENSE       |
| 19F         | CTTCCTTCAGAAGTTATGGATTTC   | SENSE       |
| 20F         | CAGAAACCGTATTGAGTATGTAAAGC | SENSE       |
| 21F         | GAAGACTCTACAACCCGAATACTG   | SENSE       |
| 15R         | CTTGTTATCACTGCTCTGTCAGTTG  | ANTISENSE   |
| 16R         | CCACAAGGGGAAAGTGTAATCAAC   | ANTISENSE   |
| 17R         | GAGGTGCATTTGAATGATGCTAAC   | ANTISENSE   |
| 18R         | CACATCGATTTAAGATTGTAACAG   | ANTISENSE   |
| 19R         | GAAGAAAACCTGGAATTGGTGGTGTG | ANTISENSE   |
| 20R         | GCATTTTAGCATTACTTCATATCTG  | ANTISENSE   |
| 21R         | CAAGTCCTATAATAGTGCAATTTTG  | ANTISENSE   |

**BRAF Sequencing Primers:**

BRAF exon 11 was amplified and sequenced using J-hBRAFe11F (5'AGGTAATGTAC TTAGGGTGAA3') and J-hBRAFe11R (5'TGTTAGAAACTTTTGGAGGAG).

Annealing temperature was 61.5 °C with 35 cycles.

Primers for BRAF exon 15 were 5'TCATAATGCTTGCTCTGATAGGA3' and 5'GGCCAA AAATTTAATCAGTGGA3'. Annealing temperature was 53 °C with 35 cycles.
