# Supplementary material
Source: PubMed Central journal article supplement (PMC2148401)
Supplement: pnas_0707498104_12.pdf [file pnas_0707498104_12.pdf]

Table 6. SNP array data corresponding to EGFR/HER2/MET copy number in the indicated cell lines.

EGFR SNP array data

| ProbeSetID    | Median   | Mean        | SNP_A-1989988 | SNP_A-206887 | SNP_A-225288 | SNP_A-201261 | SNP_A-211913 | SNP_A-2222805 | SNP_A-2101835 | SNP_A-1989990 | SNP_A-4212396 |
|---------------|----------|-------------|---------------|--------------|--------------|--------------|--------------|---------------|---------------|---------------|---------------|
| Affy_SNP.ID   |          |             | 2568889       | 6195985      | 9040198      | 4941856      | 6973989      | 8566536       | 6695364       | 2568944       | 2568952       |
| dbSNP         |          |             | rs763317      | rs12538489   | rs12718939   | rs7785313    | rs7789965    | rs759167      | rs729969      | rs723527      | rs10488140    |
| Chromosome    |          |             | 7             | 7            | 7            | 7            | 7            | 7             | 7             | 7             | 7             |
| Position      |          |             | 54869406      | 54874045     | 54879529     | 54887304     | 54887957     | 54901993      | 54902416      | 54909081      | 54912597      |
| Strand        |          |             | +             | +            | +            | -            | -            | +             | -             | +             | -             |
| Cytoband      |          |             | p11.2         | p11.2        | p11.2        | p11.2        | p11.2        | p11.2         | p11.2         | p11.2         | p11.2         |
| KYSE-520      | 6.718733 | 6.741493429 | 6.718733      | 6.660314     | 6.660314     | 6.718733     | 6.718733     | 6.718733      | 6.718733      | 6.44475       | 6.44475       |
| OE21          | 6.595853 | 6.635474776 | 6.711752      | 6.711752     | 6.711752     | 6.595853     | 6.595853     | 6.542427      | 6.542427      | 6.538132      | 6.538132      |
| H3255         | 6.410685 | 6.354872816 | 6.740301      | 6.60731      | 6.60731      | 6.60731      | 6.60731      | 6.740301      | 6.740301      | 6.410685      | 6.410685      |
| NCI-H1573     | 6.040599 | 6.045958408 | 6.283974      | 6.045694     | 6.045694     | 6.040599     | 6.040599     | 6.040599      | 6.040599      | 5.823272      | 5.823272      |
| HSC-2         | 5.94195  | 5.813092776 | 6.042633      | 5.94195      | 5.94195      | 6.042633     | 6.042633     | 6.042633      | 6.042633      | 5.94195       | 6.042633      |
| HCC-827       | 5.624093 | 5.535087755 | 5.64778       | 5.64778      | 5.64778      | 5.749433     | 5.892709     | 5.778581      | 5.892709      | 5.778581      | 5.817453      |
| Hs 852.T      | 5.523843 | 5.50758651  | 5.540834      | 5.540834     | 5.540834     | 5.523843     | 5.523843     | 5.523843      | 5.523843      | 5.428645      | 5.523843      |
| KYSE-30       | 5.370001 | 5.336481449 | 5.504307      | 5.504307     | 5.504307     | 5.528331     | 5.528331     | 5.528331      | 5.528331      | 5.504307      | 5.428478      |
| A431          | 5.251607 | 5.025420796 | 5.31399       | 5.31399      | 5.31399      | 5.401314     | 5.401314     | 5.251607      | 5.251607      | 4.952981      | 4.952981      |
| BT-20         | 5.150625 | 5.128556102 | 5.198636      | 4.99139      | 4.99139      | 5.319849     | 5.319849     | 5.319849      | 5.319849      | 5.212884      | 5.212884      |
| Ca9-22        | 4.671795 | 4.575755531 | 4.671795      | 4.671795     | 4.671795     | 4.893767     | 4.893767     | 4.893767      | 4.749979      | 4.671795      | 4.671795      |
| NCI-H1568     | 4.362549 | 4.422823857 | 4.40939       | 4.508003     | 4.508003     | 4.621867     | 4.621867     | 4.621867      | 4.508003      | 4.621867      | 4.621867      |
| PC-9          | 4.307727 | 4.364724714 | 4.41178       | 4.41178      | 4.41178      | 4.42986      | 4.42986      | 4.781583      | 4.42986       | 4.42986       | 4.621809      |
| PNT1A         | 4.25082  | 4.194447653 | 4.258922      | 4.274299     | 4.274299     | 4.482283     | 4.482283     | 4.482283      | 4.258922      | 4.258236      | 4.258236      |
| LUDLU-1       | 4.218594 | 4.141259612 | 4.269861      | 4.28757      | 4.28757      | 4.269861     | 4.269861     | 4.269861      | 4.075545      | 4.021817      | 4.021817      |
| RERF-LC-MA    | 4.014391 | 3.983236102 | 3.874689      | 3.874689     | 3.874689     | 3.992777     | 4.064202     | 4             | 4             | 4             | 4             |
| U373 MG       | 3.932433 | 3.789928306 | 3.999589      | 3.906136     | 3.906136     | 3.999589     | 4.048313     | 4.073112      | 4.048313      | 3.906136      | 4.048313      |
| KYSE-450      | 3.869267 | 3.909038163 | 3.866752      | 3.866752     | 3.866752     | 3.869267     | 3.869267     | 3.917789      | 3.866752      | 3.815796      | 3.815796      |
| KOSC-2 cl3-43 | 3.853418 | 3.66012851  | 3.871591      | 3.786779     | 3.786779     | 3.871591     | 4.047412     | 3.871591      | 3.853418      | 3.80363       | 3.80363       |
| LU65          | 3.688177 | 3.603873857 | 3.688177      | 3.688177     | 3.688177     | 3.688177     | 3.719899     | 3.719899      | 3.688177      | 3.701103      | 3.701103      |
| PC-14         | 3.68137  | 3.683669429 | 3.961857      | 3.961857     | 3.961857     | 3.961857     | 3.961857     | 3.961857      | 3.922973      | 3.906605      | 3.902885      |
| NCI-H596      | 3.6606   | 3.72199549  | 3.92666       | 3.92666      | 3.92666      | 3.92666      | 3.92666      | 4.050986      | 3.92666       | 3.92666       | 3.653337      |
| PC-3 [JPC-3]  | 3.647499 | 3.663076592 | 3.556417      | 3.556417     | 3.556417     | 3.655638     | 3.790605     | 3.790605      | 3.655638      | 3.767242      | 3.790605      |
| 647-V         | 3.633134 | 3.470668102 | 3.645379      | 3.645379     | 3.645379     | 3.645379     | 3.694535     | 3.645379      | 3.694535      | 3.694535      | 3.657458      |
| HSC-3         | 3.570758 | 3.469518286 | 3.609322      | 3.609322     | 3.609322     | 3.635909     | 3.635909     | 3.635909      | 3.613514      | 3.613514      | 3.609322      |
| CASKI         | 3.548381 | 3.565312755 | 3.518584      | 3.518584     | 3.512398     | 3.512398     | 3.536453     | 3.512398      | 3.512398      | 3.480862      | 3.480862      |
| JHH-4         | 3.541971 | 3.443115082 | 3.72645       | 3.449344     | 3.601622     | 3.72645      | 3.72645      | 3.601622      | 3.601622      | 3.601622      | 3.655199      |
| CAL-85-1      | 3.516086 | 3.438231571 | 3.629782      | 3.598705     | 3.598705     | 3.598705     | 3.629782     | 3.598705      | 3.598705      | 3.638944      | 3.638944      |
| BT-549        | 3.510869 | 3.393711531 | 3.441616      | 3.441616     | 3.441616     | 3.489373     | 3.510869     | 3.495127      | 3.495127      | 3.510869      | 3.510869      |
| HSC-4         | 3.450828 | 3.365350612 | 3.26703       | 3.26703      | 3.26703      | 3.287011     | 3.468548     | 3.480836      | 3.480836      | 3.480836      | 3.480836      |
| NUGC-4        | 3.444932 | 3.439893429 | 3.581544      | 3.581544     | 3.581544     | 3.622942     | 3.622942     | 3.622942      | 3.622942      | 3.711979      | 3.743687      |
| BICR10        | 3.436105 | 3.404563714 | 3.453907      | 3.267523     | 3.418784     | 3.453907     | 3.453907     | 3.418784      | 3.418784      | 3.418784      | 3.418784      |
| KYSE-140      | 3.423342 | 3.430674939 | 3.431471      | 3.431471     | 3.431471     | 3.397922     | 3.397922     | 3.383845      | 3.383845      | 3.383845      | 3.500964      |
| SNU-5         | 3.418943 | 3.358147245 | 3.465719      | 3.465719     | 3.465719     | 3.469476     | 3.469476     | 3.495591      | 3.469476      | 3.469476      | 3.420266      |
| SK-MEL-3      | 3.41406  | 3.467373469 | 3.489846      | 3.524579     | 3.524579     | 3.549528     | 3.549528     | 3.549528      | 3.524579      | 3.549528      | 3.524579      |
| KYSE-180      | 3.391391 | 3.375015286 | 3.582653      | 3.582653     | 3.582653     | 3.582653     | 3.582653     | 3.582653      | 3.306478      | 3.306478      | 3.204192      |
| PNT2          | 3.387888 | 3.397246694 | 3.405847      | 3.562451     | 3.457522     | 3.405847     | 3.457522     | 3.578741      | 3.578741      | 3.457522      | 3.457522      |
| G-361         | 3.372822 | 3.363805449 | 3.31356       | 3.316807     | 3.316807     | 3.372822     | 3.372822     | 3.372822      | 3.372822      | 3.372822      | 3.372822      |
| KYSE-220      | 3.322587 | 3.368848184 | 3.244652      | 3.292362     | 3.292362     | 3.292362     | 3.292362     | 3.369054      | 3.369054      | 3.865377      | 3.865377      |
| WM-115        | 3.272539 | 3.263409122 | 3.177676      | 3.179853     | 3.305193     | 3.393857     | 3.393857     | 3.436052      | 3.436052      | 3.436052      | 3.436052      |
| KYSE-50       | 3.266165 | 3.222311694 | 3.209538      | 3.209538     | 3.209538     | 3.333031     | 3.333031     | 3.395734      | 3.333031      | 3.395734      | 3.395734      |
| OSC-20        | 3.247106 | 3.134442612 | 2.979487      | 2.979487     | 3.108146     | 3.342224     | 3.342224     | 3.342224      | 3.132013      | 3.132013      | 3.132013      |

| ProbeSetID         | Median   | Mean        | SNP_A-1989988 | SNP_A-206887 | SNP_A-225288 | SNP_A-201261 | SNP_A-211913 | SNP_A-2222805 | SNP_A-2101835 | SNP_A-1989990 | SNP_A-4212396 |
|--------------------|----------|-------------|---------------|--------------|--------------|--------------|--------------|---------------|---------------|---------------|---------------|
| Affy_SNP.ID        |          |             | 2568889       | 6195985      | 9040198      | 4941856      | 6973989      | 8566536       | 6695364       | 2568944       | 2568952       |
| dbSNP              |          |             | rs763317      | rs12538489   | rs12718939   | rs7785313    | rs7789965    | rs759167      | rs729969      | rs723527      | rs10488140    |
| Chromosome         |          |             | 7             | 7            | 7            | 7            | 7            | 7             | 7             | 7             | 7             |
| Position           |          |             | 54869406      | 54874045     | 54879529     | 54887304     | 54887957     | 54901993      | 54902416      | 54909081      | 54912597      |
| Strand             |          |             | +             | +            | +            | -            | -            | +             | -             | +             | -             |
| Cytoband           |          |             | p11.2         | p11.2        | p11.2        | p11.2        | p11.2        | p11.2         | p11.2         | p11.2         | p11.2         |
| SAT                | 3.241407 | 3.153325755 | 3.206196      | 3.206196     | 3.210638     | 3.290546     | 3.290546     | 3.241407      | 3.241407      | 3.210638      | 3.210638      |
| NCI-H1650          | 3.226752 | 3.218400714 | 3.83591       | 3.83591      | 3.83591      | 3.836849     | 3.836849     | 3.836849      | 3.83591       | 3.751073      | 3.518346      |
| SK-CO-1            | 3.214665 | 3.265122184 | 3.502499      | 3.502499     | 3.502499     | 3.566612     | 3.652499     | 3.725649      | 3.566612      | 3.566612      | 3.566612      |
| NCI-H1792          | 3.210818 | 3.195864449 | 3.37014       | 3.37014      | 3.37014      | 3.37014      | 3.691703     | 3.692449      | 3.691703      | 3.37014       | 3.229938      |
| NCI-H1703          | 3.19572  | 3.149808551 | 3.16358       | 3.229891     | 3.229891     | 3.229891     | 3.229891     | 3.187826      | 3.16358       | 3.16358       | 3.16358       |
| PCI 4B             | 3.171588 | 3.167475531 | 3.178856      | 3.237981     | 3.171588     | 3.237981     | 3.237981     | 3.237981      | 3.237981      | 3.171588      | 3.171588      |
| NCI-H1563          | 3.156902 | 3.015406714 | 3.156902      | 3.156902     | 3.156902     | 3.241539     | 3.283369     | 3.301327      | 3.283369      | 3.283369      | 3.283369      |
| NCI-H841           | 3.132091 | 3.048329694 | 3.132091      | 3.132091     | 3.132091     | 3.132091     | 3.132091     | 3.132091      | 3.132091      | 3.132091      | 3.132091      |
| LOU-NH91           | 3.111632 | 3.083197041 | 3.091937      | 3.150625     | 3.150625     | 3.245861     | 3.383068     | 3.245861      | 3.217618      | 3.189097      | 3.189097      |
| HuH-7              | 3.09566  | 2.977372102 | 3.007807      | 3.007807     | 3.007807     | 3.034269     | 3.09566      | 3.09566       | 3.034269      | 3.034269      | 3.034269      |
| LC-1 sq            | 3.090563 | 2.950721367 | 3.175325      | 2.958327     | 3.090563     | 3.175325     | 3.191389     | 3.175325      | 3.090563      | 3.090563      | 3.090563      |
| NCI-H522           | 3.088288 | 3.056570878 | 3.059922      | 3.059922     | 3.059922     | 3.059922     | 3.146846     | 3.169511      | 3.169511      | 3.169511      | 3.169511      |
| 201T               | 3.080531 | 2.957688367 | 3.09712       | 3.09712      | 3.09712      | 3.09712      | 3.162905     | 3.206871      | 3.206871      | 3.206871      | 3.09712       |
| G-292 Clone A141B1 | 3.079211 | 3.077906061 | 3.101378      | 3.101378     | 3.101378     | 3.101378     | 3.101378     | 3.101378      | 3.021934      | 2.996675      | 2.996675      |
| RPMI-7951          | 3.075119 | 3.038721531 | 3.041106      | 3.070971     | 3.070971     | 3.041106     | 3.084605     | 3.090128      | 3.090128      | 3.084605      | 3.084605      |
| BEN                | 3.072106 | 3.005211204 | 3.072106      | 3.072106     | 3.072106     | 3.082038     | 3.160291     | 3.160291      | 3.160291      | 3.169925      | 3.189097      |
| NCI-H2228          | 3.055512 | 3.015296918 | 3.055512      | 3.055512     | 3.055512     | 3.039728     | 3.055512     | 3.055512      | 3.039728      | 3.055512      | 3.324858      |
| HCC-44             | 3.045739 | 2.911290592 | 3.05383       | 3.055292     | 3.055292     | 3.161227     | 3.222571     | 3.222571      | 3.161227      | 3.161227      | 3.161227      |
| NCI-H1734          | 3.045608 | 3.014053653 | 2.97999       | 2.97999      | 3.084288     | 3.084288     | 3.084288     | 3.084288      | 3.049612      | 3.049612      | 3.049612      |
| YKG-1              | 3.033795 | 2.986565571 | 3.418528      | 3.343058     | 3.343058     | 3.418528     | 3.418528     | 3.418528      | 3.418528      | 3.343058      | 3.343058      |
| MOG-G-CCM          | 3.031173 | 3.081210755 | 3.170906      | 3.170906     | 3.170906     | 3.202471     | 3.232565     | 3.317986      | 3.202471      | 3.471859      | 3.520868      |
| SK-BR-3            | 3.021924 | 2.964034673 | 3.227063      | 3.189097     | 3.189097     | 3.227063     | 3.328966     | 3.227063      | 3.227063      | 3.12143       | 3.12143       |
| COLO 858           | 3.014686 | 3.064249245 | 3.109089      | 3.109089     | 3.167885     | 3.338335     | 3.338335     | 3.338335      | 3.267048      | 3.167885      | 3.167885      |
| SCC-4              | 2.995215 | 3.022357388 | 3.394952      | 3.20894      | 3.394952     | 3.433174     | 3.609181     | 3.591725      | 3.521353      | 3.433174      | 3.433174      |
| TE7                | 2.973552 | 2.907018959 | 3.036184      | 2.89907      | 2.89907      | 3.036184     | 3.036184     | 2.999687      | 2.999687      | 2.94022       | 2.999687      |
| NCI-H1755          | 2.972533 | 2.915477939 | 3.024049      | 3.024049     | 3.072046     | 3.092628     | 3.092628     | 3.092628      | 3.072046      | 3.080074      | 3.092628      |
| CaR-1              | 2.967637 | 2.952000245 | 2.94097       | 2.94097      | 2.948934     | 2.974674     | 2.974674     | 2.948934      | 2.94097       | 2.94097       | 2.948934      |
| OVISe              | 2.964705 | 2.882252347 | 2.764106      | 2.764106     | 2.983398     | 3.035317     | 3.035317     | 2.983398      | 2.983398      | 2.952857      | 2.952857      |
| Calu-3             | 2.960385 | 2.960519143 | 3.160928      | 3.160928     | 3.160928     | 3.142402     | 3.142402     | 3.142402      | 3.065731      | 3.065731      | 3.065731      |
| NCI-H1623          | 2.952411 | 2.902007673 | 3.06155       | 3.034219     | 3.035015     | 3.034219     | 3.034219     | 3.034219      | 3.034219      | 3.034219      | 3.035015      |
| BICR 78            | 2.950678 | 3.025212449 | 2.929577      | 2.929577     | 2.929577     | 3.230541     | 3.230541     | 3.230541      | 3.230541      | 3.445063      | 3.445063      |
| LS 123             | 2.946317 | 2.916922939 | 3.045046      | 3.237154     | 3.237154     | 3.045046     | 3.237154     | 3.260578      | 3.237154      | 2.98877       | 2.979846      |
| AN3CA              | 2.941199 | 2.922365857 | 2.62018       | 2.62018      | 2.653454     | 2.903978     | 2.903978     | 2.962557      | 2.962557      | 3.055782      | 3.055782      |
| 639-V              | 2.937969 | 2.807446408 | 2.937969      | 2.91964      | 2.937969     | 2.993201     | 2.993201     | 2.993201      | 2.981715      | 2.981715      | 2.981715      |
| WM 266-4           | 2.930068 | 2.874593204 | 2.855266      | 2.855266     | 2.901953     | 3.057063     | 3.057063     | 3.11125       | 3.11125       | 3.054361      | 3.054361      |
| SKN-3              | 2.928416 | 2.813150816 | 2.961006      | 2.961006     | 2.961006     | 3.125017     | 3.125017     | 3.125017      | 2.961006      | 2.961006      | 2.961006      |
| NCI-H2085          | 2.928009 | 2.947168959 | 3.019797      | 3.019797     | 3.019797     | 3.019797     | 3.06164      | 3.175959      | 3.06164       | 3.113084      | 3.113084      |
| RKN                | 2.92781  | 2.754522816 | 2.78781       | 2.78781      | 2.789445     | 3.049802     | 3.049802     | 3.049802      | 3.049802      | 3.049893      | 3.049893      |
| MKN45              | 2.917551 | 2.898736    | 2.926439      | 2.926439     | 2.906593     | 3.00802      | 3.00802      | 3.145925      | 3.00802       | 2.898922      | 3.00802       |
| KHOS/NP            | 2.902185 | 2.938604816 | 3.250765      | 3.250765     | 3.250765     | 3.292786     | 3.296351     | 3.296351      | 3.292786      | 3.250765      | 3.156554      |
| SNU-16             | 2.899323 | 2.904760367 | 2.922701      | 2.922701     | 2.876703     | 2.876703     | 3.004233     | 3.03699       | 3.004233      | 3.004233      | 2.876703      |
| HCE7               | 2.890214 | 2.745430184 | 2.486753      | 2.761115     | 2.832555     | 2.973748     | 2.978346     | 2.973748      | 2.973748      | 2.973748      | 2.973748      |
| OCUG-1             | 2.888539 | 2.844002143 | 2.940095      | 2.940095     | 2.940095     | 2.970029     | 2.970029     | 2.940095      | 2.888539      | 2.888539      | 2.836196      |
| NL20-TA            | 2.883583 | 2.820962367 | 2.542325      | 2.593667     | 2.542325     | 2.78182      | 2.876767     | 2.93947       | 2.93947       | 2.93947       | 2.93947       |
| KYSE-70            | 2.866528 | 2.846896367 | 2.867169      | 2.867169     | 2.867169     | 3.02882      | 2.867169     | 2.867169      | 2.759153      | 2.740295      | 2.866528      |
| MOG-G-UVW          | 2.865042 | 2.869016898 | 2.937552      | 3.087882     | 3.087882     | 3.087882     | 3.129781     | 3.263475      | 3.087882      | 2.859703      | 2.948934      |
| NCI-H2342          | 2.860635 | 2.878060735 | 2.894629      | 2.894629     | 2.894629     | 2.894629     | 2.894629     | 2.894629      | 2.884125      | 2.860635      | 2.860635      |

| ProbeSetID         | Median   | Mean        | SNP_A-1989988 | SNP_A-206887 | SNP_A-225288 | SNP_A-201261 | SNP_A-211913 | SNP_A-2222805 | SNP_A-2101835 | SNP_A-1989990 | SNP_A-4212396 |
|--------------------|----------|-------------|---------------|--------------|--------------|--------------|--------------|---------------|---------------|---------------|---------------|
| Affy_SNP.ID        |          |             | 2568889       | 6195985      | 9040198      | 4941856      | 6973989      | 8566536       | 6695364       | 2568944       | 2568952       |
| dbSNP              |          |             | rs763317      | rs12538489   | rs12718939   | rs7785313    | rs7789965    | rs759167      | rs729969      | rs723527      | rs10488140    |
| Chromosome         |          |             | 7             | 7            | 7            | 7            | 7            | 7             | 7             | 7             | 7             |
| Position           |          |             | 54869406      | 54874045     | 54879529     | 54887304     | 54887957     | 54901993      | 54902416      | 54909081      | 54912597      |
| Strand             |          |             | +             | +            | +            | -            | -            | +             | -             | +             | -             |
| Cytoband           |          |             | p11.2         | p11.2        | p11.2        | p11.2        | p11.2        | p11.2         | p11.2         | p11.2         | p11.2         |
| ABC-1              | 2.855212 | 2.86351     | 2.811985      | 2.811985     | 2.811985     | 2.897802     | 2.897802     | 2.95017       | 2.95017       | 3.072106      | 3.140926      |
| NCI-H650           | 2.854933 | 2.829436796 | 2.925675      | 2.925675     | 2.925675     | 2.925675     | 3.000187     | 3.142528      | 3.000187      | 2.925675      | 2.794719      |
| FTC 133            | 2.854504 | 2.811006531 | 2.813128      | 2.813128     | 2.813128     | 2.863257     | 2.863257     | 2.863257      | 2.813128      | 2.75963       | 2.648858      |
| MDST8              | 2.853753 | 2.828383551 | 2.853753      | 2.936228     | 2.925822     | 2.936228     | 2.936228     | 2.925822      | 2.913045      | 2.853753      | 2.853753      |
| KYSE-150           | 2.852089 | 2.865999061 | 2.975281      | 2.975281     | 2.975281     | 2.966574     | 2.864069     | 2.864069      | 2.854032      | 2.854032      | 2.854032      |
| SW 48              | 2.851531 | 2.832725265 | 2.859403      | 2.915252     | 2.915252     | 2.915252     | 2.915252     | 2.915252      | 2.896681      | 2.896681      | 2.896681      |
| NCI-H2023          | 2.849425 | 2.815705388 | 2.836553      | 2.836553     | 2.86163      | 2.86163      | 2.86163      | 3.029658      | 2.86163       | 3.029658      | 3.029658      |
| COLO-680N          | 2.846328 | 2.893982776 | 2.837675      | 2.837675     | 2.994213     | 3.063936     | 3.106593     | 3.295467      | 3.295467      | 3.578991      | 3.578991      |
| KP-4               | 2.8349   | 2.716085265 | 2.976588      | 2.976588     | 2.976588     | 3.113457     | 3.113457     | 3.113457      | 2.976588      | 2.976588      | 2.976588      |
| SW-1710            | 2.828271 | 2.801945388 | 3.005303      | 2.990623     | 3.005303     | 3.025081     | 3.025081     | 3.005303      | 3.025081      | 3.025081      | 3.025081      |
| KATO III           | 2.813345 | 2.646816    | 2.991032      | 2.991032     | 2.991032     | 2.991032     | 3.003021     | 3.003021      | 2.991032      | 2.991032      | 2.991032      |
| RERF-GC-1B         | 2.812758 | 2.764795    | 2.737425      | 2.737425     | 2.737425     | 2.871492     | 2.871492     | 2.871492      | 2.741277      | 2.741277      | 2.741277      |
| CAL-29             | 2.811331 | 2.750759939 | 2.915294      | 2.915294     | 2.915294     | 3.045708     | 3.270877     | 3.270877      | 3.045708      | 2.915294      | 2.844175      |
| Sci-1              | 2.804648 | 2.734233612 | 2.829592      | 2.829592     | 2.829592     | 2.845424     | 2.845424     | 2.845424      | 2.829592      | 2.81144       | 2.81144       |
| NCI-H810           | 2.800201 | 2.807169837 | 2.58053       | 2.750768     | 2.750768     | 2.753248     | 2.753248     | 2.921559      | 2.921559      | 2.921559      | 2.753248      |
| T.Tn               | 2.782865 | 2.72791102  | 2.796679      | 2.796679     | 2.782865     | 2.842624     | 2.842624     | 2.842624      | 2.782865      | 2.782865      | 2.782865      |
| DOK                | 2.781798 | 2.813705898 | 3.154514      | 3.154514     | 3.090197     | 3.090197     | 3.090197     | 3.158389      | 3.090197      | 3.029083      | 2.992669      |
| COLO 741           | 2.773798 | 2.771708367 | 2.771823      | 2.860753     | 2.860753     | 2.906066     | 2.906066     | 2.965542      | 2.906066      | 2.906066      | 2.906066      |
| NCI-H1651          | 2.773677 | 2.673708429 | 2.773677      | 2.734753     | 2.773677     | 2.734753     | 2.773677     | 2.786129      | 2.786129      | 2.786129      | 2.786129      |
| RWPE-1             | 2.768763 | 2.737865061 | 2.857614      | 2.788447     | 2.80242      | 2.788447     | 2.80242      | 2.788447      | 2.788447      | 2.788447      | 2.788447      |
| KYSE-270           | 2.762888 | 2.689595388 | 2.767204      | 2.767204     | 2.839423     | 2.839423     | 2.839423     | 2.767204      | 2.839423      | 2.839423      | 2.839423      |
| NCI-H196           | 2.748477 | 2.771432061 | 2.891337      | 2.982341     | 2.982341     | 2.982341     | 3.013204     | 3.013204      | 2.982341      | 2.982341      | 2.982341      |
| SK-LU-1            | 2.741065 | 2.782619918 | 2.925497      | 3.011172     | 3.011172     | 3.240891     | 3.240891     | 3.256483      | 2.925497      | 2.925497      | 2.925497      |
| NCI-H1693 (ship16) | 2.73986  | 2.68732498  | 2.612233      | 2.73986      | 2.831701     | 2.73986      | 2.73986      | 2.831701      | 2.831701      | 2.826722      | 2.831701      |
| NCI-H2135          | 2.738285 | 2.70914298  | 2.6742        | 2.564037     | 2.652971     | 2.564037     | 2.652971     | 2.652971      | 2.738285      | 2.738285      | 2.738285      |
| VMRC-RCW           | 2.732449 | 2.653201673 | 3.060821      | 2.743508     | 2.865074     | 3.060821     | 3.060821     | 3.003877      | 2.865769      | 2.865769      | 2.865769      |
| RERF-LC-Sq1        | 2.732214 | 2.740655163 | 2.767757      | 2.767757     | 2.767757     | 2.767757     | 2.959682     | 2.959682      | 2.767757      | 2.959682      | 2.959682      |
| A375.S2            | 2.732202 | 2.769671592 | 2.730075      | 2.730075     | 2.730075     | 2.950606     | 2.964561     | 3.026759      | 2.964561      | 2.964561      | 2.950606      |
| SW 1116            | 2.729671 | 2.775940694 | 2.992587      | 3.005242     | 3.005242     | 3.005242     | 3.005242     | 3.060481      | 3.060481      | 2.887298      | 2.887298      |
| CAL-148            | 2.728069 | 2.636859184 | 2.596894      | 2.56399      | 2.596894     | 2.596894     | 2.811397     | 2.811397      | 2.811397      | 2.811397      | 2.891453      |
| 22RV1              | 2.727004 | 2.711221531 | 2.847447      | 2.847447     | 2.847447     | 2.847447     | 2.89983      | 2.89983       | 2.847447      | 2.89983       | 2.89983       |
| IM-95              | 2.726768 | 2.714460102 | 2.833777      | 2.833777     | 2.833777     | 2.833777     | 2.833777     | 2.829516      | 2.829516      | 2.829516      | 2.829516      |
| HT 115             | 2.724872 | 2.716082633 | 2.592551      | 2.592551     | 2.592551     | 2.724872     | 2.724872     | 2.592551      | 2.724872      | 2.592551      | 2.592551      |
| NCI-H727           | 2.721212 | 2.703270735 | 2.80183       | 2.926523     | 2.926523     | 2.926523     | 2.926523     | 3.057193      | 2.926523      | 3.13694       | 2.926523      |
| T.T                | 2.718233 | 2.706004306 | 2.687827      | 2.687827     | 2.687827     | 2.705201     | 2.705201     | 2.687827      | 2.705201      | 2.705201      | 2.705201      |
| OE33               | 2.71355  | 2.719964857 | 2.875926      | 2.875926     | 2.875926     | 2.875926     | 2.875926     | 2.875926      | 2.837395      | 2.837395      | 2.740764      |
| PLC/PRF/5          | 2.711645 | 2.673463837 | 2.541118      | 2.624064     | 2.656547     | 2.753014     | 2.656547     | 2.656547      | 2.656547      | 2.624064      | 2.656547      |
| SAS                | 2.711081 | 2.608931592 | 3.10791       | 2.507132     | 2.704398     | 3.10791      | 3.10791      | 2.78525       | 2.78525       | 2.78525       | 2.883434      |
| MKN74              | 2.706985 | 2.702259306 | 2.897369      | 2.897369     | 2.897369     | 2.95465      | 2.95465      | 2.975467      | 2.95465       | 2.897369      | 2.809501      |
| HMCB               | 2.703291 | 2.678871612 | 2.698912      | 2.698912     | 2.910783     | 2.910783     | 2.910783     | 2.880916      | 2.880916      | 2.698912      | 2.490078      |
| A2058              | 2.689237 | 2.609137531 | 2.536414      | 2.536414     | 2.625191     | 2.682503     | 2.930779     | 2.682503      | 2.930779      | 2.930779      | 2.932231      |
| HCC-366            | 2.673229 | 2.556834857 | 2.708656      | 2.759275     | 2.759275     | 2.708656     | 2.83023      | 2.83023       | 2.708656      | 2.83023       | 2.83023       |
| P31/FUJ            | 2.672578 | 2.625101571 | 2.793163      | 2.786745     | 2.786745     | 2.793163     | 2.793163     | 2.793163      | 2.786745      | 2.786745      | 2.78029       |
| SW 1417            | 2.672327 | 2.65521902  | 2.807637      | 2.830392     | 2.830392     | 2.830392     | 2.933129     | 2.933129      | 2.830392      | 2.830392      | 2.814434      |
| KMRC-1             | 2.666206 | 2.539772939 | 2.601747      | 2.374636     | 2.601747     | 2.666206     | 2.742515     | 2.742515      | 2.666206      | 2.601747      | 2.514323      |
| OAW42              | 2.664958 | 2.659155429 | 2.633763      | 2.633763     | 2.633763     | 2.634261     | 2.70441      | 2.853506      | 2.759708      | 2.814912      | 2.814912      |
| PE/CA-PJ15         | 2.662264 | 2.639397531 | 2.730814      | 2.730814     | 2.730814     | 2.730814     | 2.730814     | 2.730814      | 2.702872      | 2.662264      | 2.662264      |

| ProbeSetID   | Median   | Mean        | SNP_A-1989988 | SNP_A-206887 | SNP_A-225288 | SNP_A-201261 | SNP_A-211913 | SNP_A-2222805 | SNP_A-2101835 | SNP_A-1989990 | SNP_A-4212396 |
|--------------|----------|-------------|---------------|--------------|--------------|--------------|--------------|---------------|---------------|---------------|---------------|
| Affy_SNP.ID  |          |             | 2568889       | 6195985      | 9040198      | 4941856      | 6973989      | 8566536       | 6695364       | 2568944       | 2568952       |
| dbSNP        |          |             | rs763317      | rs12538489   | rs12718939   | rs7785313    | rs7789965    | rs759167      | rs729969      | rs723527      | rs10488140    |
| Chromosome   |          |             | 7             | 7            | 7            | 7            | 7            | 7             | 7             | 7             | 7             |
| Position     |          |             | 54869406      | 54874045     | 54879529     | 54887304     | 54887957     | 54901993      | 54902416      | 54909081      | 54912597      |
| Strand       |          |             | +             | +            | +            | -            | -            | +             | -             | +             | -             |
| Cytoband     |          |             | p11.2         | p11.2        | p11.2        | p11.2        | p11.2        | p11.2         | p11.2         | p11.2         | p11.2         |
| NUGC-3       | 2.658408 | 2.663259469 | 2.628256      | 2.628256     | 2.710168     | 2.837405     | 2.837405     | 2.854998      | 2.854998      | 2.854998      | 2.837405      |
| DMS 273      | 2.646371 | 2.609157347 | 2.814869      | 2.814869     | 2.814869     | 2.814869     | 2.890479     | 3.102323      | 2.814869      | 2.814869      | 2.759109      |
| MKN1         | 2.642413 | 2.622494796 | 2.726903      | 2.726903     | 2.726903     | 2.803272     | 2.803272     | 2.803272      | 2.659877      | 2.659877      | 2.659877      |
| RERF-LC-Ad2  | 2.634979 | 2.642198796 | 2.628105      | 2.628105     | 2.628105     | 2.767536     | 2.767536     | 2.767536      | 2.642171      | 2.642171      | 2.642171      |
| TASK1        | 2.628593 | 2.500382918 | 2.533021      | 2.377245     | 2.533021     | 2.942739     | 2.942739     | 2.628593      | 2.628593      | 2.628593      | 2.729828      |
| NCI-H23      | 2.62612  | 2.60171351  | 2.738743      | 2.738743     | 2.804058     | 2.804058     | 2.870991     | 2.952877      | 2.870991      | 2.804058      | 2.804058      |
| KP-1N        | 2.623518 | 2.460675347 | 2.324974      | 2.324974     | 2.325065     | 2.678012     | 2.890458     | 2.678012      | 2.678012      | 2.678012      | 2.678012      |
| NCI-H711     | 2.622425 | 2.586977082 | 2.399112      | 2.399112     | 2.58007      | 2.702985     | 2.702985     | 2.702985      | 2.648688      | 2.702985      | 2.702985      |
| NCI-H661     | 2.621297 | 2.613435184 | 2.546877      | 2.546877     | 2.648216     | 2.648216     | 2.648216     | 2.648216      | 2.600904      | 2.648216      | 2.709604      |
| EBC-1        | 2.62068  | 2.586313082 | 2.477574      | 2.477574     | 2.538066     | 2.666847     | 2.757023     | 2.757023      | 2.757023      | 2.757023      | 2.757023      |
| JHH-6        | 2.616256 | 2.50211402  | 2.371619      | 2.228894     | 2.371619     | 2.808858     | 2.808858     | 2.752892      | 2.570852      | 2.570852      | 2.570852      |
| NB69         | 2.609723 | 2.623469163 | 2.502446      | 2.609723     | 2.609723     | 2.609723     | 2.609723     | 2.609723      | 2.558847      | 2.558847      | 2.558847      |
| SR           | 2.607445 | 2.643014612 | 2.788897      | 2.788897     | 2.788897     | 2.810405     | 3.132383     | 3.270246      | 3.132383      | 2.810405      | 2.810405      |
| T84          | 2.604509 | 2.598727551 | 2.678526      | 2.671435     | 2.678526     | 2.712197     | 2.884454     | 2.712197      | 2.712197      | 2.671435      | 2.604509      |
| HO-1-N-1     | 2.6041   | 2.427990837 | 2.556993      | 2.310372     | 2.556993     | 2.6041       | 2.727329     | 2.6041        | 2.6041        | 2.6041        | 2.625226      |
| BALL-1       | 2.602836 | 2.603702612 | 2.388527      | 2.388527     | 2.473426     | 2.753936     | 2.753936     | 2.65773       | 2.65773       | 2.65773       | 2.65773       |
| Nthy-ori 3-1 | 2.601196 | 2.610085694 | 2.37134       | 2.601196     | 2.601196     | 2.820574     | 2.820574     | 2.820574      | 2.671218      | 2.671218      | 2.671218      |
| FTC 238      | 2.599685 | 2.571267122 | 2.460258      | 2.417234     | 2.460258     | 2.645045     | 2.645045     | 2.645045      | 2.417234      | 2.417234      | 2.599685      |
| HuCCT1       | 2.595263 | 2.551327673 | 2.235536      | 2.227308     | 2.235536     | 2.742359     | 2.742359     | 2.742359      | 2.742359      | 2.742359      | 2.742359      |
| HOS          | 2.591082 | 2.549625918 | 2.463319      | 2.463319     | 2.608742     | 2.672087     | 2.701515     | 2.701515      | 2.701515      | 2.694538      | 2.672087      |
| NCI-H2170    | 2.587636 | 2.593833245 | 2.821442      | 2.821442     | 2.821442     | 2.581167     | 2.587636     | 2.826661      | 2.587636      | 2.587636      | 2.581167      |
| Hs 936.T     | 2.583749 | 2.579530408 | 2.691758      | 2.743999     | 2.691758     | 2.571704     | 2.691758     | 2.739257      | 2.706782      | 2.739257      | 2.739257      |
| NCI-H1793    | 2.582747 | 2.599235592 | 2.602953      | 2.605831     | 2.602953     | 2.573195     | 2.602953     | 2.602953      | 2.573195      | 2.796318      | 2.796318      |
| MRK-nu-1     | 2.574874 | 2.526067612 | 2.483876      | 2.389763     | 2.483876     | 2.574874     | 2.574874     | 2.574874      | 2.574874      | 2.574874      | 2.587859      |
| KHOS-312H    | 2.569064 | 2.573914143 | 2.780444      | 2.780444     | 2.780444     | 2.846436     | 2.924953     | 2.846436      | 2.846436      | 2.846436      | 2.709886      |
| LCLC-103H    | 2.564998 | 2.510750082 | 2.624459      | 2.624459     | 2.624459     | 2.80349      | 2.80349      | 2.80349       | 2.720639      | 2.720639      | 2.720639      |
| H69V         | 2.559905 | 2.697188429 | 2.791233      | 2.873464     | 2.873464     | 2.921265     | 2.921265     | 3.262218      | 2.873464      | 2.873464      | 2.873464      |
| GCT          | 2.558752 | 2.501207816 | 2.478173      | 2.478173     | 2.478173     | 2.478173     | 2.478637     | 2.564014      | 2.478637      | 2.510651      | 2.510651      |
| COLO 857     | 2.554101 | 2.516956816 | 2.60894       | 2.60894      | 2.60894      | 2.695422     | 2.695422     | 2.695422      | 2.60894       | 2.508547      | 2.508547      |
| RERF-LC-MS   | 2.550014 | 2.554352776 | 2.453017      | 2.453017     | 2.655375     | 2.745904     | 2.745904     | 2.757023      | 2.655375      | 2.757023      | 2.757023      |
| MKN7         | 2.538066 | 2.503053918 | 2.585563      | 2.585563     | 2.585563     | 2.585563     | 2.585563     | 2.585563      | 2.573762      | 2.573762      | 2.573762      |
| A-427        | 2.534808 | 2.352632184 | 2.236281      | 2.064046     | 2.496985     | 2.573348     | 2.61572      | 2.573348      | 2.61572       | 2.496985      | 2.496985      |
| T47D         | 2.533249 | 2.55140051  | 2.487338      | 2.449599     | 2.487338     | 2.541919     | 2.568306     | 2.568306      | 2.541919      | 2.541919      | 2.541919      |
| BT-483       | 2.515964 | 2.554997571 | 2.642471      | 2.642471     | 2.642471     | 2.754181     | 2.754181     | 2.791409      | 2.754181      | 2.791409      | 2.604662      |
| SKN          | 2.509067 | 2.411093816 | 2.222503      | 2.222503     | 2.576162     | 2.604966     | 2.773313     | 2.773313      | 2.773313      | 2.773313      | 2.773313      |
| HCC202       | 2.504674 | 2.497351061 | 2.504674      | 2.504674     | 2.504674     | 2.604674     | 2.770288     | 2.770288      | 2.770288      | 2.729167      | 2.604673      |
| OCUM-1       | 2.501923 | 2.496531714 | 2.609022      | 2.609022     | 2.609022     | 2.745904     | 2.745904     | 2.609022      | 2.573762      | 2.573762      | 2.609022      |
| NCI-H2122    | 2.492184 | 2.453601163 | 2.469383      | 2.483351     | 2.483351     | 2.483351     | 2.617863     | 2.617863      | 2.483351      | 2.617863      | 2.617863      |
| HT 29        | 2.48307  | 2.492675531 | 2.564061      | 2.564061     | 2.564061     | 2.689316     | 2.564061     | 2.480274      | 2.564061      | 2.362905      | 2.25788       |
| huH-1        | 2.480336 | 2.400045388 | 2.58402       | 2.477488     | 2.477488     | 2.58402      | 2.658718     | 2.58402       | 2.58402       | 2.58402       | 2.58402       |
| HCC-15       | 2.478943 | 2.454757265 | 2.460972      | 2.460972     | 2.460972     | 2.460972     | 2.478943     | 2.478943      | 2.478943      | 2.478943      | 2.478943      |
| KHOS-240S    | 2.473022 | 2.427126306 | 2.648008      | 2.648008     | 2.648008     | 2.648008     | 2.659705     | 2.659705      | 2.648008      | 2.624087      | 2.46048       |
| JIMT-1       | 2.467801 | 2.416077633 | 2.468733      | 2.273026     | 2.468733     | 2.284239     | 2.468733     | 2.473781      | 2.473781      | 2.473781      | 2.473781      |
| KON          | 2.465788 | 2.393919245 | 2.600013      | 2.24814      | 2.649183     | 2.707968     | 2.707968     | 2.649183      | 2.603035      | 2.595451      | 2.595451      |
| COLO 853     | 2.457194 | 2.42537798  | 2.383239      | 2.383239     | 2.435231     | 2.46515      | 2.46515      | 2.46515       | 2.435231      | 2.46515       | 2.53724       |
| U-2 OS       | 2.453017 | 2.464540571 | 2.261862      | 2.261862     | 2.403268     | 2.561913     | 2.585563     | 2.585563      | 2.666847      | 2.700994      | 2.700994      |
| ME-180       | 2.448612 | 2.296262408 | 2.375497      | 2.367621     | 2.375497     | 2.683015     | 2.693267     | 2.683015      | 2.650727      | 2.683015      | 2.683015      |

| ProbeSetID  | Median    | Mean        | SNP_A-1989988 | SNP_A-206887 | SNP_A-225288 | SNP_A-201261 | SNP_A-211913 | SNP_A-2222805 | SNP_A-2101835 | SNP_A-1989990 | SNP_A-4212396 |
|-------------|-----------|-------------|---------------|--------------|--------------|--------------|--------------|---------------|---------------|---------------|---------------|
| Affy_SNP.ID |           |             | 2568889       | 6195985      | 9040198      | 4941856      | 6973989      | 8566536       | 6695364       | 2568944       | 2568952       |
| dbSNP       |           |             | rs763317      | rs12538489   | rs12718939   | rs7785313    | rs7789965    | rs759167      | rs729969      | rs723527      | rs10488140    |
| Chromosome  |           |             | 7             | 7            | 7            | 7            | 7            | 7             | 7             | 7             | 7             |
| Position    |           |             | 54869406      | 54874045     | 54879529     | 54887304     | 54887957     | 54901993      | 54902416      | 54909081      | 54912597      |
| Strand      |           |             | +             | +            | +            | -            | -            | +             | -             | +             | -             |
| Cytoband    |           |             | p11.2         | p11.2        | p11.2        | p11.2        | p11.2        | p11.2         | p11.2         | p11.2         | p11.2         |
| FU97        | 2.440152  | 2.394430122 | 2.104192      | 2.104192     | 2.528689     | 2.528689     | 2.60769      | 2.60769       | 2.528689      | 2.459828      | 2.459828      |
| Calu-1      | 2.423993  | 2.393085122 | 2.324252      | 2.393302     | 2.417272     | 2.4839       | 2.5783       | 2.588071      | 2.5783        | 2.5783        | 2.5783        |
| NCI-H2452   | 2.420291  | 2.388003878 | 2.362829      | 2.420291     | 2.420291     | 2.420291     | 2.420291     | 2.420291      | 2.420291      | 2.514239      | 2.514239      |
| UMC-11      | 2.416248  | 2.343465367 | 2.802999      | 2.301574     | 2.623343     | 2.623343     | 2.701866     | 2.701866      | 2.701866      | 2.701866      | 2.701866      |
| COLO 684    | 2.404058  | 2.400842408 | 2.585281      | 2.428759     | 2.428759     | 2.32184      | 2.550408     | 2.550408      | 2.550408      | 2.404058      | 2.404058      |
| SVts-8      | 2.4032677 | 1.88929752  | 2.7680996     | 2.7680996    | 2.7901256    | 2.8228525    | 2.8872133    | 2.8872133     | 2.8228525     | 2.8228525     | 2.8872133     |
| HEC-1       | 2.399539  | 2.336459061 | 2.145639      | 2.06111      | 2.06111      | 2.145639     | 2.465383     | 2.465383      | 2.465383      | 2.385323      | 2.616465      |
| A-375       | 2.397768  | 2.300920306 | 2.208942      | 2.208942     | 2.208942     | 2.338028     | 2.420404     | 2.420404      | 2.420404      | 2.502141      | 2.502141      |
| OUMS-23     | 2.396737  | 2.337490898 | 2.666206      | 2.462336     | 2.462336     | 2.577461     | 2.577461     | 2.577461      | 2.462336      | 2.462336      | 2.462336      |
| EJ138       | 2.393516  | 2.434952878 | 2.683971      | 2.683971     | 2.683971     | 2.683971     | 2.683971     | 2.700168      | 2.683971      | 2.659659      | 2.659659      |
| HO-1-u-1    | 2.39266   | 2.279093204 | 2.697292      | 2.068276     | 2.697292     | 2.697292     | 2.697292     | 2.697292      | 2.39266       | 2.388376      | 2.39266       |
| HT55        | 2.391842  | 2.421966204 | 2.7445        | 2.770409     | 2.770409     | 2.770409     | 2.770409     | 2.770409      | 2.588871      | 2.533417      | 2.530346      |
| NCI-H2347   | 2.388061  | 2.384280531 | 2.204886      | 2.53458      | 2.53458      | 2.53458      | 2.53458      | 2.53458       | 2.53458       | 2.53458       | 2.53458       |
| RERF-LC-KJ  | 2.383365  | 2.438087082 | 2.664935      | 2.664935     | 2.664935     | 2.664935     | 2.736866     | 2.736866      | 2.664935      | 2.664935      | 2.664935      |
| COR-L279    | 2.366668  | 2.336264245 | 2.473414      | 2.519642     | 2.519642     | 2.57726      | 2.685838     | 2.730724      | 2.730724      | 2.473414      | 2.590129      |
| SW 1573     | 2.36377   | 2.233322878 | 2.317359      | 2.315963     | 2.315963     | 2.317359     | 2.374889     | 2.36377       | 2.36377       | 2.36377       | 2.36377       |
| SW 900      | 2.356754  | 2.365797694 | 2.499934      | 2.499934     | 2.499934     | 2.441762     | 2.499934     | 2.499934      | 2.499934      | 2.441762      | 2.441762      |
| HT 1376     | 2.351215  | 2.331488429 | 2.524024      | 2.56846      | 2.56846      | 2.56846      | 2.56846      | 2.395391      | 2.377663      | 2.377663      | 2.377663      |
| HUP-T3      | 2.347342  | 2.241781898 | 2.312741      | 2.155293     | 2.312741     | 2.347342     | 2.428274     | 2.347342      | 2.428274      | 2.428274      | 2.428274      |
| STC 1       | 2.34628   | 2.253264184 | 2.307312      | 2.307312     | 2.307312     | 2.35359      | 2.398622     | 2.398622      | 2.35359       | 2.35359       | 2.307312      |
| NCI-H2286   | 2.341299  | 2.342265041 | 2.220807      | 2.220807     | 2.220807     | 2.311874     | 2.311874     | 2.311874      | 2.290037      | 2.290037      | 2.290037      |
| VMRC-LCD    | 2.33985   | 2.341863837 | 2.352646      | 2.403268     | 2.403268     | 2.403268     | 2.44066      | 2.44066       | 2.465322      | 2.465322      | 2.643856      |
| H69AR       | 2.338349  | 2.301531918 | 2.313453      | 2.356805     | 2.356805     | 2.356805     | 2.356805     | 2.478674      | 2.356805      | 2.356805      | 2.480726      |
| VMRC-LCP    | 2.33487   | 2.236303122 | 2.419668      | 2.139019     | 2.32853      | 2.419668     | 2.445869     | 2.419668      | 2.445869      | 2.445869      | 2.445869      |
| FLYA13      | 2.321944  | 2.322221102 | 2.595979      | 2.655294     | 2.655294     | 2.595979     | 2.595979     | 2.584833      | 2.4576        | 2.4576        | 2.4576        |
| HUP-T4      | 2.308596  | 2.245841469 | 2.248246      | 2.248246     | 2.308596     | 2.452117     | 2.60541      | 2.452117      | 2.308596      | 2.308596      | 2.308596      |
| COR-L 105   | 2.307818  | 2.293109898 | 2.532698      | 2.532698     | 2.18708      | 2.532698     | 2.532698     | 2.507664      | 2.47618       | 2.326598      | 2.326598      |
| KMRC-20     | 2.302951  | 2.292869449 | 2.302951      | 2.302951     | 2.302951     | 2.370223     | 2.380952     | 2.370223      | 2.370223      | 2.302951      | 2.302951      |
| NCI-H2081   | 2.295681  | 2.298436918 | 2.213956      | 2.213956     | 2.395089     | 2.395089     | 2.395089     | 2.491758      | 2.395089      | 2.491758      | 2.617456      |
| VM-CUB1     | 2.293832  | 2.297199245 | 2.308441      | 2.618364     | 2.489336     | 2.489336     | 2.489336     | 2.618364      | 2.489336      | 2.403029      | 2.344732      |
| BU25 TK     | 2.29009   | 2.329399041 | 2.4729        | 2.491685     | 2.496365     | 2.608052     | 2.608052     | 2.638276      | 2.608052      | 2.608052      | 2.608052      |
| RCM-1       | 2.287897  | 2.188751082 | 2.249953      | 2.249953     | 2.319581     | 2.523122     | 2.555577     | 2.523122      | 2.319581      | 2.319581      | 2.319581      |
| NCI-H2172   | 2.284971  | 2.277862041 | 2.284971      | 2.284971     | 2.284971     | 2.244245     | 2.284971     | 2.284971      | 2.284971      | 2.351752      | 2.351752      |
| SK-NEP-1    | 2.283689  | 2.267003837 | 2.101561      | 2.057959     | 2.101561     | 2.101561     | 2.27481      | 2.101561      | 2.101561      | 2.101561      | 2.101561      |
| D1.1        | 2.281505  | 2.266256898 | 2.093471      | 2.120455     | 2.120455     | 2.127241     | 2.127241     | 2.398446      | 2.398446      | 2.375801      | 2.375801      |
| NCI-H2196   | 2.280615  | 2.285093878 | 2.283533      | 2.283533     | 2.283533     | 2.455285     | 2.455285     | 2.394737      | 2.455285      | 2.455285      | 2.394737      |
| NCI-H1435   | 2.276856  | 2.193842163 | 2.170972      | 2.170972     | 2.170972     | 2.170972     | 2.240571     | 2.240571      | 2.240571      | 2.298246      | 2.298246      |
| GRANTA-519  | 2.27561   | 2.147157163 | 2.087669      | 2.12228      | 2.129007     | 2.347419     | 2.359009     | 2.347419      | 2.347419      | 2.359009      | 2.413474      |
| SK-MES      | 2.271936  | 2.264511735 | 2.083383      | 2.108336     | 2.232676     | 2.480983     | 2.480983     | 2.232676      | 2.232676      | 2.232676      | 2.232676      |
| NCI-H1437   | 2.264798  | 2.262715878 | 2.295942      | 2.416747     | 2.416747     | 2.416747     | 2.417721     | 2.416747      | 2.393088      | 2.393088      | 2.393088      |
| BFTC-905    | 2.259674  | 2.269937816 | 2.421089      | 2.096319     | 2.418183     | 2.421089     | 2.539694     | 2.539694      | 2.421089      | 2.418183      | 2.418183      |
| DMS 153     | 2.258751  | 2.204225408 | 2.045716      | 2.045716     | 2.14218      | 2.14218      | 2.267074     | 2.267074      | 2.289711      | 2.507531      | 2.289711      |
| Detroit 562 | 2.256824  | 2.266237776 | 2.427068      | 2.427068     | 2.484998     | 2.484998     | 2.427068     | 2.427068      | 2.253734      | 2.228054      | 2.228054      |
| RT4         | 2.246948  | 2.22294298  | 2.38195       | 2.38195      | 2.38195      | 2.38195      | 2.405888     | 2.405888      | 2.38195       | 2.345052      | 2.38195       |
| 273T        | 2.238925  | 2.232078265 | 2.164192      | 2.171651     | 2.164192     | 2.269664     | 2.269664     | 2.282826      | 2.282826      | 2.282826      | 2.282826      |
| SW 1463     | 2.238128  | 2.247130306 | 2.352377      | 2.352377     | 2.352377     | 2.417684     | 2.417684     | 2.288471      | 2.40639       | 2.40639       | 2.274574      |
| H69         | 2.237583  | 2.252691306 | 2.237583      | 2.237583     | 2.237583     | 2.237583     | 2.237583     | 2.063214      | 2.061378      | 2.061378      | 2.061378      |

| ProbeSetID      | Median   | Mean        | SNP_A-1989988 | SNP_A-206887 | SNP_A-225288 | SNP_A-201261 | SNP_A-211913 | SNP_A-2222805 | SNP_A-2101835 | SNP_A-1989990 | SNP_A-4212396 |
|-----------------|----------|-------------|---------------|--------------|--------------|--------------|--------------|---------------|---------------|---------------|---------------|
| Affy_SNP.ID     |          |             | 2568889       | 6195985      | 9040198      | 4941856      | 6973989      | 8566536       | 6695364       | 2568944       | 2568952       |
| dbSNP           |          |             | rs763317      | rs12538489   | rs12718939   | rs7785313    | rs7789965    | rs759167      | rs729969      | rs723527      | rs10488140    |
| Chromosome      |          |             | 7             | 7            | 7            | 7            | 7            | 7             | 7             | 7             | 7             |
| Position        |          |             | 54869406      | 54874045     | 54879529     | 54887304     | 54887957     | 54901993      | 54902416      | 54909081      | 54912597      |
| Strand          |          |             | +             | +            | +            | -            | -            | +             | -             | +             | -             |
| Cytoband        |          |             | p11.2         | p11.2        | p11.2        | p11.2        | p11.2        | p11.2         | p11.2         | p11.2         | p11.2         |
| Hs 195.T        | 2.236919 | 2.20431902  | 1.974918      | 1.978002     | 1.991316     | 2.226788     | 2.503571     | 2.551683      | 2.427241      | 2.551683      | 2.575075      |
| NCI-H1781       | 2.229587 | 2.225333224 | 2.20326       | 2.20326      | 2.229587     | 2.230879     | 2.357863     | 2.363032      | 2.363032      | 2.593749      | 2.593749      |
| WIDR            | 2.223745 | 2.244019082 | 2.345858      | 2.345858     | 2.446586     | 2.451784     | 2.451784     | 2.451784      | 2.432761      | 2.335397      | 2.432761      |
| SK-MEL-1        | 2.214036 | 2.254872041 | 2.593021      | 2.646106     | 2.646106     | 2.567915     | 2.567915     | 2.646106      | 2.567915      | 2.567915      | 2.567915      |
| SUIT-2          | 2.212777 | 2.213396735 | 2.12033       | 2.12033      | 2.385234     | 2.462742     | 2.462742     | 2.385234      | 2.375763      | 2.375763      | 2.375763      |
| WPE1-NB26       | 2.203354 | 2.140397327 | 2.342132      | 2.342132     | 2.342132     | 2.342132     | 2.364342     | 2.364342      | 2.342132      | 2.364342      | 2.364342      |
| HCC-78          | 2.201821 | 2.246317673 | 2.124492      | 2.137768     | 2.137768     | 2.137768     | 2.354381     | 2.354381      | 2.354381      | 2.3738        | 2.562649      |
| A549            | 2.201767 | 2.192650061 | 2.105569      | 2.141273     | 2.141273     | 2.253536     | 2.253536     | 2.301509      | 2.301509      | 2.301509      | 2.301509      |
| LK-2            | 2.201363 | 2.149191898 | 2.201363      | 2.201363     | 2.201363     | 2.259753     | 2.266141     | 2.259753      | 2.094602      | 2.094602      | 2.083804      |
| NCI-H2330       | 2.198132 | 2.180153082 | 2.088285      | 2.088285     | 2.088285     | 2.272724     | 2.366706     | 2.372707      | 2.367028      | 2.272724      | 2.366706      |
| COLO 685        | 2.197742 | 2.163006286 | 2.883084      | 2.240014     | 2.240014     | 2.195289     | 2.240014     | 2.360028      | 2.360028      | 2.240014      | 2.360028      |
| BICR22          | 2.184063 | 2.213391143 | 2.277157      | 2.277157     | 2.277157     | 2.379915     | 2.277157     | 2.277157      | 2.127751      | 2.127751      | 2.127751      |
| MEWO            | 2.183021 | 2.180176102 | 2.124008      | 2.176337     | 2.176337     | 2.183021     | 2.183021     | 2.183021      | 2.183021      | 2.183021      | 2.183021      |
| IHH-4           | 2.181084 | 2.159299041 | 2.326096      | 2.326096     | 2.326096     | 2.326096     | 2.326096     | 2.267456      | 2.267456      | 2.181084      | 2.181084      |
| NCI-N87         | 2.180447 | 2.207232306 | 2.334677      | 2.334677     | 2.311848     | 2.341337     | 2.341337     | 2.341337      | 2.341337      | 2.238327      | 2.161493      |
| KYSE-410        | 2.176975 | 2.200467918 | 2.320253      | 2.320253     | 2.320253     | 2.465678     | 2.465678     | 2.469616      | 2.274653      | 2.288106      | 2.288106      |
| DMS 92          | 2.175971 | 2.099747673 | 2.144843      | 2.144843     | 2.175971     | 2.433468     | 2.433468     | 2.182343      | 2.175971      | 2.182343      | 2.182343      |
| RO82-W-1        | 2.175428 | 2.149052918 | 2.302107      | 2.302107     | 2.302107     | 2.330576     | 2.330576     | 2.330576      | 2.330576      | 2.302107      | 2.226721      |
| NCI-H82         | 2.170632 | 2.172188755 | 2.327036      | 2.327036     | 2.327036     | 2.327036     | 2.421663     | 2.488422      | 2.421663      | 2.277904      | 2.178562      |
| C32             | 2.163402 | 2.076808429 | 1.849507      | 1.849507     | 2.146352     | 2.146352     | 2.146352     | 2.370287      | 2.125722      | 2.334536      | 2.334536      |
| Hs 633T         | 2.159405 | 2.168496776 | 2.040955      | 2.172929     | 2.172929     | 2.172929     | 2.211745     | 2.211745      | 2.172929      | 2.172929      | 2.172929      |
| NCI-H2405       | 2.148394 | 2.115157286 | 2.148394      | 2.151284     | 2.168414     | 2.151284     | 2.151284     | 2.168414      | 2.242163      | 2.168414      | 2.168414      |
| Hs 895.T        | 2.141685 | 2.170353061 | 2.270676      | 2.270676     | 2.270676     | 2.270676     | 2.270676     | 2.364037      | 2.364037      | 2.364037      | 2.364037      |
| MG 63           | 2.141685 | 2.148053612 | 1.905234      | 1.905234     | 2.018207     | 2.102925     | 2.102925     | 2.102925      | 2.018207      | 2.018207      | 2.102925      |
| CAL-120         | 2.137493 | 1.99951251  | 2.140737      | 2.13664      | 2.137493     | 2.215269     | 2.243158     | 2.15269       | 2.168863      | 2.168863      | 2.168863      |
| H33HJ-JA1       | 2.133418 | 2.156652918 | 2.164424      | 2.280929     | 2.280929     | 2.371835     | 2.426383     | 2.42912       | 2.42912       | 2.426383      | 2.426383      |
| JSC-1           | 2.131158 | 2.157892816 | 2.212308      | 2.212308     | 2.287884     | 2.394611     | 2.476767     | 2.553089      | 2.476767      | 2.432177      | 2.432177      |
| Hs 751.T        | 2.130414 | 2.105885837 | 2.00395       | 2.00395      | 2.015109     | 2.130414     | 2.344412     | 2.344412      | 2.130414      | 2.344412      | 2.344412      |
| HMVII           | 2.1288   | 2.040526735 | 2.015769      | 2.015769     | 2.359086     | 2.359086     | 2.359086     | 2.383277      | 2.359086      | 2.245107      | 2.245107      |
| fR2             | 2.124962 | 2.049262571 | 2.102354      | 2.102354     | 2.102354     | 2.118669     | 2.238912     | 2.238912      | 2.118669      | 2.118669      | 2.139019      |
| COLO 201        | 2.124672 | 2.115652347 | 2.138703      | 2.138703     | 2.138703     | 2.208767     | 2.208767     | 2.208767      | 2.138703      | 2.208767      | 2.334947      |
| NCI-H1915       | 2.119292 | 2.066165714 | 1.999986      | 2.105569     | 2.105569     | 2.21405      | 2.21405      | 2.21405       | 2.367519      | 2.21405       | 2.21405       |
| IMR-90          | 2.117312 | 2.121663755 | 2.051588      | 1.892683     | 2.051588     | 2.525095     | 2.525095     | 2.423507      | 2.423507      | 2.423507      | 2.509708      |
| RT112/84        | 2.115316 | 2.091732163 | 2.115316      | 2.115316     | 2.115316     | 2.35336      | 2.481325     | 2.481325      | 2.35336       | 2.35336       | 2.402916      |
| Hs 894(E).Lu    | 2.11282  | 2.127957408 | 2.11282       | 2.262191     | 2.272501     | 2.262191     | 2.262191     | 2.272501      | 2.236773      | 2.236773      | 2.236773      |
| LNCAp clone FGC | 2.108322 | 2.093793735 | 2.032351      | 2.032351     | 2.059754     | 2.266719     | 2.266719     | 2.266719      | 2.108322      | 2.108322      | 2.108322      |
| NCI-H1581       | 2.107682 | 2.072259918 | 2.147832      | 2.147832     | 2.147832     | 2.147832     | 2.11551      | 2.11551       | 2.111197      | 2.111197      | 2.111197      |
| HCT 116         | 2.106237 | 2.085858327 | 2.106584      | 2.12423      | 2.12423      | 2.12423      | 2.12423      | 2.106584      | 2.055129      | 2.055129      | 2.042135      |
| Hs 228.T        | 2.103719 | 2.11547302  | 2.076704      | 2.103719     | 2.076704     | 2.103719     | 2.226027     | 2.229014      | 2.226027      | 2.226027      | 2.229014      |
| JURKAT EC-1     | 2.096947 | 2.077322082 | 2.096947      | 2.101254     | 2.101254     | 2.101254     | 2.096947     | 2.053444      | 2.096947      | 2.053444      | 2.096947      |
| SK-N-BE(2)      | 2.096877 | 2.108693571 | 2.018135      | 2.018135     | 2.018135     | 2.018135     | 2.042718     | 2.042718      | 2.042718      | 2.158722      | 2.332968      |
| LS180           | 2.093401 | 2.094016735 | 2.177654      | 2.177654     | 2.198335     | 2.198335     | 2.177654     | 2.177654      | 2.119015      | 2.070122      | 2.070122      |
| CAL-51          | 2.092144 | 2.041400265 | 1.867583      | 1.871266     | 1.915502     | 2.202883     | 2.202883     | 2.185673      | 1.915502      | 2.185673      | 2.202883      |
| SKG-IIIb        | 2.087795 | 1.906490816 | 2.072979      | 2.072979     | 2.087795     | 2.412624     | 2.412624     | 2.368941      | 2.087795      | 2.087795      | 2.087795      |
| P116 T          | 2.084434 | 2.078256776 | 1.908914      | 2.009894     | 2.076353     | 2.076353     | 2.076353     | 2.151996      | 2.151996      | 2.009894      | 2.009894      |
| Hs 417.Lu       | 2.082963 | 2.080747714 | 2.054988      | 2.054988     | 2.054988     | 2.082963     | 2.082963     | 2.082963      | 2.082963      | 2.29185       | 2.346984      |
| WIL2 NS         | 2.081925 | 2.086687388 | 1.969631      | 1.969631     | 2.228521     | 2.24146      | 2.24146      | 2.24146       | 2.154161      | 2.24146       | 2.268021      |

| ProbeSetID  | Median   | Mean        | SNP_A-1989988 | SNP_A-206887 | SNP_A-225288 | SNP_A-201261 | SNP_A-2119130 | SNP_A-2222805 | SNP_A-2101835 | SNP_A-1989990 | SNP_A-4212396 |
|-------------|----------|-------------|---------------|--------------|--------------|--------------|---------------|---------------|---------------|---------------|---------------|
| Affy_SNP.ID |          |             | 2568889       | 6195985      | 9040198      | 4941856      | 6973989       | 8566536       | 6695364       | 2568944       | 2568952       |
| dbSNP       |          |             | rs763317      | rs12538489   | rs12718939   | rs7785313    | rs7789965     | rs759167      | rs729969      | rs723527      | rs10488140    |
| Chromosome  |          |             | 7             | 7            | 7            | 7            | 7             | 7             | 7             | 7             | 7             |
| Position    |          |             | 54869406      | 54874045     | 54879529     | 54887304     | 54887957      | 54901993      | 54902416      | 54909081      | 54912597      |
| Strand      |          |             | +             | +            | +            | -            | -             | +             | -             | +             | -             |
| Cytoband    |          |             | p11.2         | p11.2        | p11.2        | p11.2        | p11.2         | p11.2         | p11.2         | p11.2         | p11.2         |
| COR-L95     | 2.081027 | 2.103553673 | 2.076198      | 2.168197     | 2.303146     | 2.303146     | 2.303146      | 2.385184      | 2.303146      | 2.208472      | 2.208472      |
| SK-N-FI     | 2.08041  | 2.053238265 | 1.870829      | 2.029739     | 1.984551     | 2.093681     | 2.093681      | 2.093681      | 2.093681      | 2.093681      | 2.093681      |
| WILCL       | 2.077982 | 2.059245714 | 1.977159      | 1.977159     | 2.007924     | 2.007924     | 2.027753      | 2.027753      | 2.027753      | 2.027753      | 2.26547       |
| P32/ISH     | 2.07364  | 2.066828878 | 2.362689      | 1.960957     | 2.304185     | 2.362689     | 2.362689      | 2.304185      | 2.271306      | 2.108613      | 2.108613      |
| EPLC-272H   | 2.069516 | 2.019263898 | 1.742631      | 1.681692     | 1.742631     | 2.269664     | 2.343272      | 2.269664      | 2.303211      | 2.303211      | 2.343272      |
| A2780 ADR   | 2.066684 | 2.033308184 | 2.001832      | 2.031109     | 2.055143     | 2.194574     | 2.055143      | 2.194574      | 2.194574      | 2.055143      | 2.194574      |
| C8166       | 2.062084 | 2.098756184 | 2.101226      | 2.101226     | 2.286212     | 2.286212     | 2.286212      | 2.390431      | 2.286212      | 2.232051      | 2.232051      |
| Hs 908.T    | 2.060333 | 2.083260286 | 2.132178      | 2.132178     | 2.132178     | 2.073232     | 2.146599      | 2.146599      | 2.146599      | 2.146599      | 2.146599      |
| NCI-H322    | 2.059372 | 2.052896837 | 2.085037      | 2.130634     | 2.130634     | 2.130662     | 2.173174      | 2.173174      | 2.173174      | 2.173174      | 2.130662      |
| NCI-H1417   | 2.059316 | 2.01582951  | 2.205061      | 2.205061     | 2.205061     | 2.205061     | 2.222784      | 2.222784      | 2.690373      | 2.690373      | 2.754869      |
| HBE4-E6/E7  | 2.058524 | 2.079743102 | 1.662684      | 1.944327     | 1.968274     | 2.180325     | 2.293024      | 2.180325      | 2.180325      | 2.066331      | 2.180325      |
| NCI-H1522   | 2.058284 | 2.015362796 | 2.164261      | 2.16851      | 2.28902      | 2.16851      | 2.227654      | 2.227654      | 2.16851       | 2.16851       | 2.16851       |
| LU99A       | 2.057138 | 2.072812837 | 2.071248      | 2.071248     | 2.085289     | 2.195222     | 2.195222      | 2.195222      | 2.195222      | 2.195222      | 2.195222      |
| HCT-8       | 2.054634 | 2.041630286 | 2.022605      | 2.152872     | 2.133997     | 2.133997     | 2.133997      | 2.269244      | 2.269244      | 2.269244      | 2.269244      |
| SBC-5       | 2.052538 | 2.032448408 | 1.938128      | 1.938128     | 2.091221     | 2.132123     | 2.132123      | 2.091221      | 2.068065      | 2.055426      | 2.055426      |
| Ishikawa    | 2.04976  | 2.068361714 | 2.308389      | 2.308389     | 2.308389     | 2.308389     | 2.292607      | 2.308389      | 2.292607      | 2.216179      | 2.192389      |
| U266B1      | 2.049136 | 2.080235408 | 2.044011      | 2.054096     | 2.044011     | 2.044011     | 2.054096      | 2.044011      | 2.044011      | 2.044011      | 2.044011      |
| PA-TU-8988T | 2.048497 | 1.999909714 | 1.994686      | 1.994686     | 1.994686     | 2.066444     | 2.14288       | 2.066444      | 2.14288       | 2.14288       | 2.175523      |
| HRT-18      | 2.047547 | 2.010640898 | 2.135209      | 2.135209     | 2.135209     | 2.293271     | 2.293271      | 2.293271      | 2.293271      | 2.232503      | 2.232503      |
| C170        | 2.047206 | 2.074730918 | 2.060997      | 2.075608     | 2.075608     | 2.075608     | 2.075608      | 2.093136      | 2.234512      | 2.093136      | 2.234512      |
| J GAMMA 1   | 2.043016 | 2.015243286 | 2.191727      | 2.191727     | 2.191727     | 2.191727     | 2.191727      | 2.159623      | 2.043016      | 1.931599      | 2.043016      |
| LS174T      | 2.040812 | 2.065228286 | 2.224052      | 2.224052     | 2.232157     | 2.232157     | 2.232157      | 2.250575      | 2.232157      | 2.172018      | 2.047887      |
| NCI-H526    | 2.034746 | 1.991198633 | 1.696427      | 1.696427     | 1.743214     | 2.09206      | 2.09206       | 2.20131       | 2.09206       | 2.20131       | 2.20131       |
| HLE         | 2.023206 | 1.98619998  | 2.19035       | 2.164301     | 2.164301     | 2.19035      | 2.19035       | 2.19035       | 2.164301      | 2.164152      | 2.164152      |
| 23132/87    | 2.014391 | 1.944262388 | 2.127006      | 2.168129     | 2.181707     | 2.208673     | 2.23539       | 2.23539       | 2.181707      | 2.181707      | 2.181707      |
| Hs 834.T    | 2.012639 | 2.032355776 | 2.190147      | 2.190147     | 2.252941     | 2.252941     | 2.252941      | 2.266996      | 2.252941      | 2.252941      | 2.252941      |
| Hs 891.T    | 2.010326 | 2.007325347 | 1.884045      | 1.912054     | 2.087879     | 2.087879     | 2.177979      | 2.177979      | 2.087879      | 2.177979      | 2.217531      |
| Hs 839.T    | 2.004872 | 1.932453143 | 2.029153      | 2.029153     | 2.063214     | 2.307844     | 2.354777      | 2.307844      | 2.307844      | 2.307844      | 2.427404      |
| SNU-1       | 2.004714 | 2.069788612 | 2.270295      | 2.270295     | 2.33001      | 2.36738      | 2.33001       | 2.270295      | 2.23016       | 2.219162      | 2.219162      |
| EB1         | 2.000692 | 1.960849898 | 2.058439      | 2.093694     | 2.108516     | 2.108516     | 2.108516      | 2.108516      | 2.058439      | 2.058439      | 2.050752      |
| NCI-H2009   | 1.988783 | 1.980017959 | 1.965983      | 1.965983     | 2.017074     | 2.114679     | 2.129669      | 2.168101      | 2.129669      | 2.129669      | 2.129669      |
| NCI-H1048   | 1.986378 | 1.961069796 | 2.117838      | 2.104595     | 2.104595     | 2.098425     | 2.098425      | 2.098425      | 2.098425      | 2.098425      | 2.014305      |
| A2780       | 1.985856 | 2.026895184 | 2.178847      | 2.248034     | 2.31993      | 2.31993      | 1.985856      | 1.985856      | 1.985856      | 1.897022      | 1.983013      |
| NCI-H1666   | 1.985537 | 1.887812714 | 1.806077      | 1.806077     | 1.775051     | 1.61471      | 1.496922      | 1.444932      | 1.444932      | 1.496922      | 1.61471       |
| G-402       | 1.983289 | 1.940407898 | 1.829022      | 1.834344     | 1.836406     | 1.836406     | 1.982011      | 1.961001      | 1.982011      | 1.995871      | 1.995871      |
| JHH-7       | 1.981416 | 1.887399939 | 1.753258      | 1.753258     | 1.793288     | 2.077069     | 2.128703      | 2.077069      | 2.077069      | 1.793288      | 2.072247      |
| OUS-11      | 1.981343 | 2.003307306 | 1.981343      | 1.981343     | 2.099025     | 2.160292     | 2.160292      | 2.099025      | 1.981343      | 2.099025      | 2.099025      |
| AZ-521      | 1.978932 | 2.036937776 | 2.073021      | 2.073021     | 2.324858     | 2.324858     | 2.324858      | 2.324858      | 2.320653      | 2.320653      | 2.320653      |
| K562/ADM    | 1.974715 | 1.825663102 | 1.848428      | 1.724244     | 1.995365     | 2.098146     | 2.110183      | 2.098146      | 2.098146      | 1.995365      | 1.995365      |
| NCI-H889    | 1.974132 | 2.12430551  | 2.155019      | 2.155019     | 2.155019     | 2.628326     | 2.628326      | 2.659395      | 2.06224       | 2.06224       | 2.819173      |
| OE19        | 1.971904 | 1.95641498  | 2.275243      | 2.145666     | 2.145666     | 2.275243     | 2.145666      | 1.974016      | 1.974016      | 1.878212      | 1.878212      |
| HT 728.T    | 1.970593 | 1.957142551 | 1.971759      | 1.971759     | 2.021058     | 2.132247     | 2.155238      | 2.155238      | 2.370046      | 2.155238      | 2.155238      |
| GA-10       | 1.967487 | 1.986767939 | 1.978293      | 1.978293     | 2.016457     | 1.978293     | 1.978293      | 1.978293      | 1.959173      | 1.959173      | 1.959173      |
| Hs 737.T    | 1.962566 | 1.979357367 | 2.025338      | 1.902609     | 1.902609     | 2.025338     | 2.076043      | 1.902609      | 1.902609      | 1.902609      | 1.953739      |
| NCI-H838    | 1.962434 | 1.928405    | 2.040855      | 2.186079     | 2.040855     | 2.040855     | 2.186079      | 2.226881      | 2.040855      | 2.040855      | 2.101951      |
| NCI-H1155   | 1.96068  | 1.972872878 | 1.96068       | 1.988928     | 1.988928     | 2.010527     | 2.052212      | 2.052212      | 2.052212      | 2.052212      | 2.010527      |
| A2780cis    | 1.955571 | 1.949626163 | 1.847546      | 1.981736     | 2.116952     | 2.186945     | 2.116952      | 2.186945      | 2.186945      | 2.116952      | 2.116952      |

| ProbeSetID                 | Median    | Mean        | SNP_A-1989988 | SNP_A-206887 | SNP_A-225288 | SNP_A-201261 | SNP_A-211913 | SNP_A-2222805 | SNP_A-2101835 | SNP_A-1989990 | SNP_A-4212396 |
|----------------------------|-----------|-------------|---------------|--------------|--------------|--------------|--------------|---------------|---------------|---------------|---------------|
| Affy_SNP.ID                |           |             | 2568889       | 6195985      | 9040198      | 4941856      | 6973989      | 8566536       | 6695364       | 2568944       | 2568952       |
| dbSNP                      |           |             | rs763317      | rs12538489   | rs12718939   | rs7785313    | rs7789965    | rs759167      | rs729969      | rs723527      | rs10488140    |
| Chromosome                 |           |             | 7             | 7            | 7            | 7            | 7            | 7             | 7             | 7             | 7             |
| Position                   |           |             | 54869406      | 54874045     | 54879529     | 54887304     | 54887957     | 54901993      | 54902416      | 54909081      | 54912597      |
| Strand                     |           |             | +             | +            | +            | -            | -            | +             | -             | +             | -             |
| Cytoband                   |           |             | p11.2         | p11.2        | p11.2        | p11.2        | p11.2        | p11.2         | p11.2         | p11.2         | p11.2         |
| G-401                      | 1.952639  | 1.91027649  | 1.894599      | 1.894599     | 1.986276     | 2.027539     | 2.119472     | 2.027539      | 1.986276      | 1.985247      | 1.985247      |
| MS-1-L                     | 1.952346  | 1.982695653 | 2.25656       | 2.134107     | 2.1996       | 2.25656      | 2.25656      | 2.25656       | 2.1996        | 2.1996        | 2.1996        |
| Hs 746T                    | 1.949352  | 1.95437602  | 1.996969      | 1.996969     | 2.123055     | 1.996969     | 1.996969     | 2.123055      | 2.198833      | 2.198833      | 2.198833      |
| SW 13                      | 1.948559  | 1.919654286 | 1.979441      | 1.979441     | 1.979441     | 1.979441     | 2.094574     | 2.094574      | 2.094574      | 2.094574      | 2.094574      |
| AGS                        | 1.947164  | 1.943232163 | 1.990781      | 1.990781     | 2.010613     | 2.010613     | 2.010613     | 2.010613      | 2.010613      | 2.010613      | 2.02322       |
| NCI-H2171                  | 1.942958  | 1.950063061 | 1.940927      | 1.940927     | 2.223665     | 2.173174     | 2.173174     | 2.173174      | 2.173174      | 2.350219      | 2.37913       |
| Hs 573.T                   | 1.930985  | 1.953761673 | 1.847637      | 1.847637     | 1.928191     | 2.063595     | 2.082444     | 2.082444      | 2.082444      | 2.082444      | 2.082444      |
| HT1080                     | 1.927481  | 1.964792755 | 2.029924      | 2.029924     | 2.069009     | 2.069009     | 2.069009     | 1.927481      | 1.927481      | 1.67104       | 1.581778      |
| COR-L 23/CPR               | 1.924772  | 1.992882388 | 1.807758      | 1.976417     | 1.976417     | 2.272895     | 2.272895     | 2.298376      | 2.272895      | 2.272895      | 2.272895      |
| HGC-27                     | 1.923706  | 1.861182878 | 1.884451      | 1.884451     | 1.950571     | 1.950571     | 1.962449     | 1.962449      | 1.950571      | 1.950571      | 1.958792      |
| SBC-3                      | 1.922283  | 1.87430849  | 1.985305      | 1.956875     | 1.985305     | 1.999062     | 1.999062     | 1.999062      | 1.956875      | 1.956875      | 1.956875      |
| COLO 792                   | 1.915651  | 1.882537204 | 1.855838      | 2.08428      | 2.08428      | 2.118461     | 2.118461     | 2.106668      | 2.08428       | 2.029739      | 2.029739      |
| H-EMC-SS                   | 1.912559  | 1.953568061 | 1.951803      | 1.951803     | 1.951803     | 2.342503     | 2.347905     | 2.347905      | 2.342503      | 2.347905      | 2.347905      |
| J82                        | 1.910432  | 1.781440857 | 1.762499      | 1.520425     | 1.762499     | 1.867191     | 1.920742     | 1.920742      | 1.920742      | 2.128552      | 2.128552      |
| Hs 600.T                   | 1.905368  | 1.931164163 | 1.864153      | 1.864153     | 2.00516      | 2.00516      | 2.052127     | 2.00516       | 1.864153      | 2.00516       | 2.052127      |
| Hs 781.T                   | 1.904757  | 1.954014347 | 1.802077      | 1.802077     | 1.898472     | 1.898472     | 2.012395     | 2.081518      | 2.012395      | 2.413911      | 2.413911      |
| BPH-1                      | 1.894345  | 1.916480796 | 1.782916      | 1.782916     | 1.856172     | 1.98471      | 2.044366     | 2.044366      | 1.98471       | 2.044366      | 2.044366      |
| COR-L23                    | 1.892174  | 1.897527306 | 1.928013      | 1.928013     | 1.928013     | 2.06135      | 2.06135      | 2.06135       | 2.06135       | 2.153241      | 2.220459      |
| A673                       | 1.889162  | 1.913707939 | 1.717012      | 1.833534     | 1.833534     | 1.833534     | 1.733832     | 1.733832      | 1.733832      | 1.717012      | 1.717012      |
| COLO 205                   | 1.884661  | 1.92261249  | 1.951891      | 2.01274      | 2.01274      | 2.132468     | 2.132468     | 1.951891      | 1.874433      | 1.865876      | 1.865876      |
| RMG-I                      | 1.866707  | 1.822054367 | 1.866707      | 1.866707     | 1.891305     | 2.23939      | 2.23939      | 2.175849      | 1.91773       | 1.91773       | 1.91773       |
| WI-26 VA4                  | 1.854321  | 1.881021184 | 1.818701      | 1.929803     | 1.929803     | 1.99577      | 2.108766     | 2.108766      | 2.108766      | 2.008456      | 2.008456      |
| Eos-HL-60                  | 1.853456  | 1.859891449 | 2.186701      | 2.186701     | 2.186701     | 2.186701     | 2.186701     | 2.186701      | 1.970782      | 1.932876      | 1.848245      |
| GP5D                       | 1.85253   | 1.869270245 | 1.972458      | 1.805614     | 1.972458     | 2.040898     | 2.040898     | 1.805614      | 1.733737      | 1.733737      | 1.733737      |
| MES-SA/Dx-5                | 1.846861  | 1.889437184 | 2.305353      | 2.305353     | 2.305353     | 2.305353     | 2.3466       | 2.305353      | 2.305353      | 2.305353      | 1.974962      |
| SBC-2                      | 1.845355  | 1.869572347 | 1.805305      | 1.746445     | 1.805305     | 1.805305     | 1.805305     | 1.880078      | 1.988175      | 2.052269      | 2.130166      |
| MCAS                       | 1.842675  | 1.692514    | 1.842675      | 1.842675     | 1.878664     | 1.929596     | 1.929596     | 1.878664      | 1.878664      | 1.878664      | 1.878664      |
| Ishikawa (Heraklio) 02 ER- | 1.833641  | 1.871376959 | 2.233448      | 2.233448     | 2.233448     | 2.233448     | 2.073429     | 2.073429      | 1.907603      | 1.870271      | 1.870271      |
| MOLT-4F                    | 1.831195  | 1.671263408 | 1.729684      | 1.729684     | 1.859749     | 1.955542     | 1.967282     | 1.955542      | 1.955542      | 1.955542      | 1.967282      |
| HARA                       | 1.828838  | 1.811220184 | 1.867719      | 1.858779     | 1.856384     | 1.858779     | 1.949147     | 1.858779      | 1.858779      | 1.858779      | 1.924757      |
| NCI-H1944                  | 1.820237  | 1.805162857 | 1.611014      | 1.735809     | 2.029339     | 2.029339     | 2.029339     | 2.029339      | 2.001212      | 1.993689      | 1.993689      |
| BICR 31                    | 1.819485  | 1.843385122 | 2.01944       | 1.941913     | 1.941913     | 1.941913     | 1.871055     | 1.841335      | 1.795472      | 1.814335      | 1.814335      |
| D341 Med                   | 1.819101  | 1.797722388 | 1.819101      | 1.894135     | 1.904727     | 1.904727     | 1.894135     | 1.894135      | 1.819101      | 1.819101      | 1.819101      |
| KHM-3S                     | 1.79781   | 1.971451857 | 1.714258      | 1.668791     | 1.668791     | 1.714258     | 2.359328     | 2.735357      | 3.248595      | 3.020628      | 3.248595      |
| COR-L88                    | 1.789457  | 1.778430939 | 1.789457      | 1.845659     | 1.845659     | 1.944327     | 1.944327     | 2.139528      | 1.944327      | 1.857779      | 1.944327      |
| NCI-H358                   | 1.786631  | 1.775809122 | 2.034461      | 2.034461     | 2.034461     | 1.985508     | 2.034461     | 1.985508      | 1.985508      | 1.985508      | 1.985508      |
| 1321N                      | 1.785668  | 1.814321673 | 2.104359      | 2.104359     | 2.104359     | 2.190107     | 2.190107     | 2.190107      | 2.019296      | 1.863563      | 2.072683      |
| KYSE-510                   | 1.717203  | 1.727553184 | 1.853988      | 1.853988     | 1.853988     | 1.853988     | 1.811703     | 1.811703      | 1.747926      | 1.811703      | 1.811703      |
| TCO-1                      | 1.702926  | 1.634383041 | 1.371826      | 1.394676     | 1.449981     | 1.613308     | 1.619487     | 1.613308      | 1.619487      | 1.619487      | 1.619487      |
| NCI-H441                   | 1.692289  | 1.722444694 | 1.666444      | 1.666444     | 1.713191     | 1.873604     | 1.873604     | 1.873604      | 1.713191      | 1.872669      | 1.872669      |
| SNU-398                    | 1.644383  | 1.610436694 | 1.812534      | 1.812534     | 1.812534     | 1.878152     | 1.812534     | 1.812534      | 1.665391      | 1.665391      | 1.665391      |
| NCI-H1299                  | 1.610634  | 1.607423367 | 1.582261      | 1.662474     | 1.672575     | 1.672575     | 1.672575     | 1.672575      | 1.683222      | 1.683222      | 1.719669      |
| ASH-3                      | 1.3333496 | 1.282063418 | 0.9883396     | 0.9883396    | 1.4151733    | 1.4205219    | 1.4964415    | 1.4964415     | 1.4964415     | 1.4964415     | 1.4964415     |
| MCF7                       | 1.150625  | 1.234855673 | 1.427392      | 1.427392     | 1.374121     | 1.427392     | 1.374121     | 1.319849      | 1.283092      | 1.283092      | 1.283092      |
| SKOV3                      | 1.0107454 | 1.027430129 | 1.0822168     | 1.0874075    | 1.2565393    | 1.2565393    | 1.0822168    | 0.9882676     | 1.0822168     | 1.2565393     | 1.2565393     |
| ChaGo-K-1                  | 0.9705445 | 0.907140933 | 0.9705445     | 1.0860414    | 1.0860414    | 1.0860414    | 0.9705445    | 0.9705445     | 1.13213       | 1.13213       | 1.13213       |
| A373 C6                    | 0.869123  | 0.901690388 | 0.8781185     | 0.8714279    | 0.8714279    | 0.8714279    | 0.8442507    | 0.8095883     | 0.8442507     | 0.8095883     | 0.7818635     |



| ProbeSetID  | Median    | Mean        | SNP_A-1989988 | SNP_A-206887 | SNP_A-225288 | SNP_A-201261 | SNP_A-211913 | SNP_A-2222805 | SNP_A-2101835 | SNP_A-1989990 | SNP_A-4212396 |
|-------------|-----------|-------------|---------------|--------------|--------------|--------------|--------------|---------------|---------------|---------------|---------------|
| Affy_SNP.ID |           |             | 2568889       | 6195985      | 9040198      | 4941856      | 6973989      | 8566536       | 6695364       | 2568944       | 2568952       |
| dbSNP       |           |             | rs763317      | rs12538489   | rs12718939   | rs7785313    | rs7789965    | rs759167      | rs729969      | rs723527      | rs10488140    |
| Chromosome  |           |             | 7             | 7            | 7            | 7            | 7            | 7             | 7             | 7             | 7             |
| Position    |           |             | 54869406      | 54874045     | 54879529     | 54887304     | 54887957     | 54901993      | 54902416      | 54909081      | 54912597      |
| Strand      |           |             | +             | +            | +            | -            | -            | +             | -             | +             | -             |
| Cytoband    |           |             | p11.2         | p11.2        | p11.2        | p11.2        | p11.2        | p11.2         | p11.2         | p11.2         | p11.2         |
| MES-SA      | 0.7528253 | 0.784296504 | 0.9228057     | 0.9228057    | 0.9228057    | 0.9228057    | 1.0695177    | 1.0695177     | 0.8519282     | 0.8519282     | 0.8519282     |
| OAW28       | 0.7357038 | 0.746945755 | 0.798911      | 0.8649355    | 0.798911     | 0.7909373    | 0.6828103    | 0.6828103     | 0.9794969     | 0.9794969     | 0.9794969     |
| NCI-H460    | 0.6484461 | 0.569243312 | 0.3147084     | 0.3777133    | 0.3777133    | 0.3777133    | 0.3897879    | 0.3897879     | 0.7146986     | 0.7146986     | 0.7146986     |

**B. ERBB2 SNP array data**

| ProbeSetID         | Mean      | SNP_A-2138860 | SNP_A-4199416 |
|--------------------|-----------|---------------|---------------|
| Affy_SNP.ID        |           | 7268231       | 11276532      |
| dbSNP              |           | rs4252612     | rs4252643     |
| Chromosome         |           | 17            | 17            |
| Position           |           | 35117234      | 35130293      |
| Strand             |           | +             | -             |
| Cytoband           |           | q12           | q12           |
| KYSE-410           | 7.406145  | 7.40414       | 7.40815       |
| Calu-3             | 6.984205  | 6.783041      | 7.185369      |
| NCI-N87            | 6.5425605 | 6.565467      | 6.519654      |
| NCI-H2170          | 6.4934345 | 6.063419      | 6.92345       |
| MKN7               | 6.382685  | 6.355836      | 6.409534      |
| VMRC-LCP           | 6.1759995 | 6.244285      | 6.107714      |
| OE33               | 5.930246  | 5.930246      | 5.930246      |
| OE19               | 5.611658  | 5.611658      | 5.611658      |
| SK-BR-3            | 5.537203  | 5.501213      | 5.573193      |
| HCC202             | 5.4161105 | 5.509775      | 5.322446      |
| HO-1-u-1           | 5.2524505 | 5.300472      | 5.204429      |
| JIMT-1             | 5.205902  | 5.205902      | 5.205902      |
| NCI-H1693 (ship16) | 4.5363085 | 4.374288      | 4.698329      |
| SKOV3              | 4.210977  | 4.286284      | 4.13567       |
| RMG-I              | 3.8286955 | 3.847051      | 3.81034       |
| BICR 31            | 3.446782  | 3.528013      | 3.365551      |
| NCI-H1563          | 3.438787  | 3.438787      | 3.438787      |
| KYSE-50            | 2.899275  | 2.901678      | 2.896872      |
| NUGC-4             | 2.8919245 | 2.833679      | 2.95017       |
| NCI-H522           | 2.881096  | 2.878906      | 2.883286      |
| REF-GC-1B          | 2.8742675 | 2.960582      | 2.787953      |
| SK-MEL-1           | 2.8493985 | 2.831863      | 2.866934      |
| COLO-680N          | 2.843106  | 2.860389      | 2.825823      |
| T.Tn               | 2.819216  | 2.819216      | 2.819216      |
| LU65               | 2.811984  | 2.81414       | 2.809828      |
| NCI-H2081          | 2.78139   | 2.78139       | 2.78139       |
| A549               | 2.7641    | 2.729223      | 2.798977      |
| LK-2               | 2.741504  | 2.744667      | 2.738341      |
| NCI-H2009          | 2.709708  | 2.732214      | 2.687202      |
| COLO 201           | 2.698706  | 2.729694      | 2.667718      |
| COLO 792           | 2.697088  | 2.697088      | 2.697088      |
| KHM-3S             | 2.6923705 | 2.69346       | 2.691281      |
| SNU-5              | 2.677204  | 2.620494      | 2.733914      |

**C. MET SNP array data**

| ProbeSetID  | Median    | Mean        | SNP_A-2060488 | SNP_A-1990987 | SNP_A-4250633 | SNP_A-2119519 |
|-------------|-----------|-------------|---------------|---------------|---------------|---------------|
| Affy_SNP.ID |           |             | 6070863       | 2625703       | 11264768      | 6981648       |
| dbSNP       |           |             | rs38841       | rs10487353    | rs38847       | rs2299433     |
| Chromosome  |           |             | 7             | 7             | 7             | 7             |
| Position    |           |             | 115913877     | 115917887     | 115919277     | 115924829     |
| Strand      |           |             | +             | -             | +             | +             |
| Cytoband    |           |             | q31.2         | q31.2         | q31.2         | q31.2         |
| Hs 746T     | 6.353536  | 6.179734786 | 6.476262      | 6.483741      | 6.476262      | 6.476262      |
| MKN45       | 5.9993945 | 6.047987857 | 5.954915      | 5.935075      | 5.935075      | 5.935075      |
| EBC-1       | 5.798258  | 5.561305071 | 5.775051      | 5.821465      | 5.821465      | 5.821465      |
| SNU-5       | 5.634547  | 5.730620286 | 6.112681      | 6.112681      | 5.634547      | 5.634547      |
| NCI-H1573   | 5.58455   | 5.582480786 | 5.730309      | 5.644351      | 5.644351      | 5.644351      |
| OE33        | 5.221678  | 5.108011429 | 5.374789      | 5.322405      | 5.322405      | 5.322405      |
| OCUG-1      | 4.686753  | 4.565070857 | 4.686372      | 4.687134      | 4.687134      | 4.687134      |
| VMRC-RCW    | 4.47436   | 4.442329857 | 3.999351      | 4.023979      | 4.586229      | 4.586229      |
| SK-BR-3     | 4.078277  | 4.040958214 | 4.1339        | 4.078277      | 4.078277      | 4.078277      |
| C32         | 4.062967  | 4.063081143 | 4.322447      | 4.322447      | 4.095586      | 4.095586      |
| Detroit 562 | 3.7587865 | 3.724144071 | 3.736275      | 3.593785      | 3.593785      | 3.736275      |
| NCI-H2342   | 3.6937315 | 3.6740345   | 3.881318      | 3.881318      | 3.881318      | 3.881318      |
| FTC 133     | 3.5743185 | 3.465995857 | 3.647539      | 3.614116      | 3.614116      | 3.614116      |
| PNT1A       | 3.507132  | 3.520597643 | 3.590536      | 3.545874      | 3.486409      | 3.545874      |
| KMRC-20     | 3.427928  | 3.426840643 | 3.572808      | 3.504144      | 3.492471      | 3.492471      |
| COLO 858    | 3.374802  | 3.354036786 | 3.374802      | 3.374802      | 3.374802      | 3.374802      |
| NUGC-4      | 3.3327075 | 3.311047214 | 2.918863      | 2.98114       | 3.217618      | 3.400879      |
| YKG-1       | 3.2886055 | 3.2031295   | 3.267634      | 3.309577      | 3.309577      | 3.312846      |
| H3255       | 3.215802  | 3.251627286 | 3.522366      | 3.437622      | 3.413821      | 3.413821      |
| SK-CO-1     | 3.1729975 | 3.118538429 | 3.351289      | 3.305964      | 3.292095      | 3.292095      |
| LOU-NH91    | 3.160291  | 3.155499429 | 3.292325      | 3.198636      | 3.160291      | 3.292325      |
| SK-MEL-3    | 3.159654  | 3.225826786 | 3.319119      | 3.319119      | 3.159654      | 3.319119      |
| NCI-H2170   | 3.153093  | 3.076933786 | 3.016807      | 3.016807      | 3.016807      | 3.153093      |
| G-361       | 3.1326005 | 3.145947357 | 3.352589      | 3.352589      | 3.352589      | 3.352589      |
| SK-NEP-1    | 3.094811  | 3.065128357 | 2.875521      | 2.904969      | 3.116878      | 3.147903      |
| HCC-44      | 3.087111  | 3.039358857 | 2.763962      | 2.763962      | 2.994182      | 3.043408      |
| WM 266-4    | 3.082038  | 3.087722714 | 3.38531       | 3.082038      | 3.082038      | 3.082038      |
| NCI-H441    | 3.077623  | 3.082637643 | 3.077623      | 3.077623      | 3.077623      | 3.199245      |
| P31/FUJ     | 3.074602  | 3.084332929 | 2.648757      | 2.84764       | 3.074602      | 3.262888      |
| MOG-G-CCM   | 3.072613  | 2.931386286 | 3.242317      | 3.072613      | 3.072613      | 3.072613      |
| SW 1417     | 3.069209  | 3.029638286 | 3.069209      | 3.069209      | 3.069209      | 3.069209      |
| COLO 853    | 3.0386255 | 3.034300357 | 2.975415      | 2.975415      | 2.975415      | 3.029699      |
| NCI-H2085   | 3.016188  | 2.965419071 | 3.016188      | 3.016188      | 3.016188      | 3.016188      |

| ProbeSetID  | Median    | Mean     | SNP_A-1989988 | SNP_A-206887 | SNP_A-225288 | SNP_A-201261 | SNP_A-211913 | SNP_A-2222805 | SNP_A-2101835 | SNP_A-1989990 | SNP_A-4212396 |
|-------------|-----------|----------|---------------|--------------|--------------|--------------|--------------|---------------|---------------|---------------|---------------|
| Affy_SNP.ID |           |          | 2568889       | 6195985      | 9040198      | 4941856      | 6973989      | 8566536       | 6695364       | 2568944       | 2568952       |
| dbSNP       |           |          | rs763317      | rs12538489   | rs12718939   | rs7785313    | rs7789965    | rs759167      | rs729969      | rs723527      | rs10488140    |
| Chromosome  |           |          | 7             | 7            | 7            | 7            | 7            | 7             | 7             | 7             | 7             |
| Position    |           |          | 54869406      | 54874045     | 54879529     | 54887304     | 54887957     | 54901993      | 54902416      | 54909081      | 54912597      |
| Strand      |           |          | +             | +            | +            | -            | -            | +             | -             | +             | -             |
| Cytoband    |           |          | p11.2         | p11.2        | p11.2        | p11.2        | p11.2        | p11.2         | p11.2         | p11.2         | p11.2         |
| D341 Med    | 2.671545  | 2.666515 | 2.676575      |              | NCI-H23      | 2.9948565    | 2.981778143  | 3.198321      | 3.127195      | 2.996522      | 3.127195      |
| NCI-H2135   | 2.6496145 | 2.617956 | 2.681273      |              | A2058        | 2.971587     | 2.894833286  | 3.088328      | 3.088328      | 3.037372      | 3.037372      |
| UMC-11      | 2.641747  | 2.607421 | 2.676073      |              | LUDLU-1      | 2.9644875    | 2.931987     | 2.804811      | 2.804811      | 2.804811      | 2.954671      |
| STC 1       | 2.629892  | 2.629892 | 2.629892      |              | COLO 741     | 2.963187     | 2.964942     | 2.963187      | 2.903029      | 2.7736        | 2.903029      |
| KATO III    | 2.6271375 | 2.562506 | 2.691769      |              | KP-4         | 2.9485235    | 2.916517429  | 2.642656      | 2.749701      | 3.117642      | 3.117642      |
| HMVII       | 2.592692  | 2.592692 | 2.592692      |              | SR           | 2.9181915    | 2.909131286  | 3.001675      | 2.889578      | 2.829007      | 2.889578      |
| COLO 205    | 2.573715  | 2.573715 | 2.573715      |              | WM-115       | 2.913138     | 2.927133857  | 3.129917      | 2.814586      | 2.814586      | 3.01169       |
| JHH-4       | 2.5730025 | 2.536773 | 2.609232      |              | NCI-H810     | 2.908847     | 2.833355214  | 3.020364      | 2.908847      | 2.908847      | 2.933108      |
| HuCCT1      | 2.557023  | 2.609069 | 2.504977      |              | SBC-5        | 2.8988535    | 2.9239435    | 2.980914      | 2.980914      | 3.115644      | 3.115644      |
| SK-LU-1     | 2.552743  | 2.552743 | 2.552743      |              | MKN1         | 2.896216     | 2.875414929  | 2.91091       | 2.91091       | 3.014514      | 3.014514      |
| WI-26 VA4   | 2.549048  | 2.549048 | 2.549048      |              | Sci-1        | 2.872665     | 2.896049571  | 3.176132      | 3.014808      | 2.872665      | 2.891581      |
| HCC-44      | 2.546363  | 2.546363 | 2.546363      |              | NCI-H1755    | 2.868482     | 2.868767071  | 2.961833      | 2.868482      | 2.868482      | 2.868482      |
| KYSE-450    | 2.5447545 | 2.566279 | 2.52323       |              | HCC202       | 2.867372     | 2.873158429  | 3.066449      | 2.999513      | 2.793963      | 2.999513      |
| MS-1-L      | 2.5130265 | 2.593702 | 2.432351      |              | LCLC-103H    | 2.86148      | 2.901389929  | 2.804244      | 2.804244      | 2.822462      | 3.018571      |
| 201T        | 2.491139  | 2.465481 | 2.516797      |              | KMRC-1       | 2.8593295    | 2.785395357  | 2.79199       | 3.042845      | 2.942573      | 2.942573      |
| NCI-H810    | 2.488556  | 2.488556 | 2.488556      |              | DMS 273      | 2.855502     | 2.845410929  | 3.329949      | 2.736252      | 2.736252      | 2.855502      |
| OAW42       | 2.4695    | 2.442368 | 2.496632      |              | SNU-16       | 2.847565     | 2.799459929  | 2.639629      | 2.639629      | 2.639629      | 2.66286       |
| NCI-H650    | 2.455322  | 2.455322 | 2.455322      |              | KATO III     | 2.840764     | 2.839600857  | 2.83463       | 2.83463       | 2.846898      | 2.846898      |
| NCI-H1666   | 2.4525955 | 2.403268 | 2.501923      |              | COLO 857     | 2.818847     | 2.852647143  | 2.818847      | 2.818847      | 2.818847      | 2.818847      |
| NCI-H2122   | 2.449908  | 2.449908 | 2.449908      |              | 22RV1        | 2.8179675    | 2.825521071  | 2.743274      | 2.717423      | 2.717423      | 2.743274      |
| MOG-G-UVW   | 2.449451  | 2.449451 | 2.449451      |              | JSC-1        | 2.808346     | 2.929921429  | 3.341663      | 3.341663      | 3.028245      | 3.028245      |
| NCI-H1581   | 2.439793  | 2.439793 | 2.439793      |              | U373 MG      | 2.7962715    | 2.773538929  | 2.855051      | 2.889885      | 2.889885      | 2.889885      |
| OVISE       | 2.425734  | 2.45409  | 2.397378      |              | U266B1       | 2.794051     | 2.850709643  | 2.789072      | 2.789072      | 2.789072      | 2.789072      |
| A2780cis    | 2.42403   | 2.42403  | 2.42403       |              | JHH-4        | 2.793842     | 2.699646929  | 2.618259      | 2.672715      | 2.793842      | 2.862679      |
| JHH-7       | 2.4203845 | 2.432475 | 2.408294      |              | COLO 792     | 2.784492     | 2.840433     | 2.99227       | 2.784492      | 2.784492      | 2.99227       |
| SW-1710     | 2.4193445 | 2.369551 | 2.469138      |              | MRK-nu-1     | 2.7834295    | 2.745245143  | 2.597645      | 2.622227      | 2.7575        | 2.826527      |
| FTC 238     | 2.4169605 | 2.441613 | 2.392308      |              | CAL-148      | 2.769583     | 2.757274714  | 2.864123      | 2.864123      | 2.739413      | 2.864123      |
| NCI-H1755   | 2.414511  | 2.414511 | 2.414511      |              | COLO 684     | 2.766928     | 2.727863643  | 2.708114      | 2.708114      | 2.766928      | 2.766928      |
| COR-L279    | 2.4071345 | 2.428934 | 2.385335      |              | PC-14        | 2.7653415    | 2.741458214  | 2.544226      | 2.544226      | 2.544226      | 2.621913      |
| U373 MG     | 2.403481  | 2.403481 | 2.403481      |              | NCI-H841     | 2.758824     | 2.786344929  | 3.22942       | 3.22942       | 3.22942       | 3.22942       |
| COLO 685    | 2.398208  | 2.398208 | 2.398208      |              | BICR 78      | 2.750902     | 2.755712929  | 2.86377       | 2.831571      | 2.766706      | 2.831571      |
| NCI-H23     | 2.389082  | 2.389082 | 2.389082      |              | RERF-LC-KJ   | 2.750535     | 2.782063286  | 2.978089      | 2.849264      | 2.750535      | 2.849264      |
| KP-4        | 2.3784035 | 2.27237  | 2.484437      |              | JHH-6        | 2.7420105    | 2.649656214  | 2.726454      | 2.757567      | 2.757567      | 2.846317      |
| LUDLU-1     | 2.377726  | 2.377726 | 2.377726      |              | SW 48        | 2.736453     | 2.781257071  | 2.722447      | 2.722447      | 2.722447      | 2.736453      |
| SNU-1       | 2.3758135 | 2.345525 | 2.406102      |              | NCI-H196     | 2.722144     | 2.627415786  | 2.326482      | 2.326482      | 2.326482      | 2.62778       |
| A373 C6     | 2.3655755 | 2.366173 | 2.364978      |              | BALL-1       | 2.721345     | 2.6989785    | 2.598724      | 2.811048      | 2.825368      | 2.825368      |
| YKG-1       | 2.3630035 | 2.327435 | 2.398572      |              | NCI-H889     | 2.718772     | 2.7394705    | 2.820291      | 2.820291      | 2.646544      | 2.820291      |
| NCI-H838    | 2.361989  | 2.361989 | 2.361989      |              | NCI-H2009    | 2.707223     | 2.677878929  | 2.712716      | 2.718694      | 2.70173       | 2.718694      |
| KYSE-180    | 2.35133   | 2.35133  | 2.35133       |              | SK-LU-1      | 2.687566     | 2.605813143  | 2.92203       | 2.811495      | 2.687566      | 2.687566      |
| NCI-H460    | 2.344501  | 2.344501 | 2.344501      |              | HEC-1        | 2.6858805    | 2.5141325    | 2.73463       | 2.73463       | 2.751825      | 2.751825      |
| SW 1116     | 2.335792  | 2.413849 | 2.257735      |              | H69AR        | 2.679096     | 2.667231214  | 2.679096      | 2.679096      | 2.658729      | 2.679096      |
| VMRC-LCD    | 2.3268825 | 2.352646 | 2.301119      |              | OCUM-1       | 2.666847     | 2.602363143  | 2.573762      | 2.573762      | 2.666847      | 2.678275      |
| OCUG-1      | 2.3204395 | 2.31401  | 2.326869      |              | KHOS-312H    | 2.645598     | 2.433654786  | 1.801104      | 1.801104      | 1.947972      | 2.00742       |
| BPH-1       | 2.319775  | 2.319775 | 2.319775      |              | IM-95        | 2.644987     | 2.6314285    | 2.661105      | 2.644987      | 2.556993      | 2.644987      |
| MCAS        | 2.3140655 | 2.321234 | 2.306897      |              | OAW42        | 2.642609     | 2.645555786  | 3.119033      | 2.907857      | 2.65734       | 2.65734       |
| NCI-H2342   | 2.310903  | 2.310903 | 2.310903      |              | MDST8        | 2.624947     | 2.635751143  | 2.772143      | 2.734037      | 2.619959      | 2.733321      |
| PE/CA-PJ15  | 2.310125  | 2.310125 | 2.310125      |              | HT 115       | 2.623534     | 2.595708071  | 2.515264      | 2.515264      | 2.629857      | 2.629857      |

| ProbeSetID  | Median    | Mean     | SNP_A-1989988 | SNP_A-206887 | SNP_A-225288 | SNP_A-201261 | SNP_A-211913 | SNP_A-2222805 | SNP_A-2101835 | SNP_A-1989990 | SNP_A-4212396 |
|-------------|-----------|----------|---------------|--------------|--------------|--------------|--------------|---------------|---------------|---------------|---------------|
| Affy_SNP.ID |           |          | 2568889       | 6195985      | 9040198      | 4941856      | 6973989      | 8566536       | 6695364       | 2568944       | 2568952       |
| dbSNP       |           |          | rs763317      | rs12538489   | rs12718939   | rs7785313    | rs7789965    | rs759167      | rs729969      | rs723527      | rs10488140    |
| Chromosome  |           |          | 7             | 7            | 7            | 7            | 7            | 7             | 7             | 7             | 7             |
| Position    |           |          | 54869406      | 54874045     | 54879529     | 54887304     | 54887957     | 54901993      | 54902416      | 54909081      | 54912597      |
| Strand      |           |          | +             | +            | +            | -            | -            | +             | -             | +             | -             |
| Cytoband    |           |          | p11.2         | p11.2        | p11.2        | p11.2        | p11.2        | p11.2         | p11.2         | p11.2         | p11.2         |
| NCI-H1781   | 2.309879  | 2.309879 | 2.309879      |              | HMGB         | 2.6161475    | 2.754683929  | 3.212003      | 3.137835      | 3.137835      | 3.137835      |
| MOLT-4F     | 2.309737  | 2.309737 | 2.309737      |              | RERF-LC-MS   | 2.614851     | 2.641049286  | 2.597317      | 2.597317      | 2.597317      | 2.609022      |
| A-427       | 2.305198  | 2.267982 | 2.342414      |              | FTC 238      | 2.6090915    | 2.576791643  | 2.719413      | 2.719413      | 2.624575      | 2.624575      |
| WM 266-4    | 2.2927635 | 2.286839 | 2.298688      |              | KHOS-240S    | 2.593009     | 2.750341429  | 2.295434      | 2.295434      | 2.295434      | 2.406979      |
| NB69        | 2.284069  | 2.284069 | 2.284069      |              | AN3CA        | 2.591834     | 2.596447143  | 2.17138       | 2.17138       | 2.17138       | 2.591834      |
| HRT-18      | 2.277852  | 2.277852 | 2.277852      |              | NCI-H1651    | 2.5754805    | 2.6328635    | 2.921894      | 2.909468      | 2.909468      | 2.909468      |
| G-361       | 2.2738    | 2.2738   | 2.2738        |              | 1321N        | 2.572272     | 2.536160643  | 2.743876      | 2.705031      | 2.695751      | 2.695751      |
| SK-CO-1     | 2.2704025 | 2.216166 | 2.324639      |              | LU65         | 2.5719265    | 2.571867357  | 2.876831      | 2.876831      | 2.876831      | 2.876831      |
| EJ138       | 2.263008  | 2.263008 | 2.263008      |              | HARA         | 2.571444     | 2.569916214  | 2.753503      | 2.732113      | 2.732113      | 2.732113      |
| HT 115      | 2.2587945 | 2.241009 | 2.27658       |              | RCM-1        | 2.569842     | 2.519454429  | 2.229627      | 2.265877      | 2.220098      | 2.436967      |
| CASKI       | 2.257669  | 2.257669 | 2.257669      |              | HuH-7        | 2.566611     | 2.553114071  | 2.566611      | 2.566611      | 2.566611      | 2.566611      |
| MKN45       | 2.2487385 | 2.253483 | 2.243994      |              | WIDR         | 2.566433     | 2.566277143  | 2.687884      | 2.667615      | 2.667615      | 2.667615      |
| Sci-1       | 2.246948  | 2.246948 | 2.246948      |              | UMC-11       | 2.564286     | 2.5420845    | 2.564286      | 2.45749       | 2.564286      | 2.587377      |
| COLO 853    | 2.242959  | 2.242959 | 2.242959      |              | huH-1        | 2.563592     | 2.536612786  | 2.204994      | 2.374725      | 2.564737      | 2.58587       |
| MEWO        | 2.240239  | 2.240239 | 2.240239      |              | HCC-827      | 2.561117     | 2.416543071  | 2.394334      | 2.561117      | 2.750924      | 2.784206      |
| P32/ISH     | 2.237343  | 2.198577 | 2.276109      |              | NCI-H2081    | 2.5595745    | 2.579073857  | 2.53049       | 2.588659      | 2.512729      | 2.658167      |
| U266B1      | 2.2343765 | 2.23838  | 2.230373      |              | SW 13        | 2.54389      | 2.553215357  | 2.469407      | 2.469407      | 2.469407      | 2.473646      |
| HEC-1       | 2.233717  | 2.172847 | 2.294587      |              | KYSE-140     | 2.54327      | 2.546991071  | 2.511267      | 2.511267      | 2.511267      | 2.54327       |
| COLO 857    | 2.232437  | 2.232437 | 2.232437      |              | LC-1 sq      | 2.536981     | 2.6609255    | 2.408357      | 2.431258      | 2.450858      | 2.559917      |
| KYSE-510    | 2.228081  | 2.228081 | 2.228081      |              | KYSE-410     | 2.536665     | 2.595577714  | 2.443408      | 2.443408      | 2.443408      | 2.457785      |
| FLYA13      | 2.22508   | 2.22508  | 2.22508       |              | CAL-85-1     | 2.5314445    | 2.538900429  | 2.814923      | 2.814923      | 2.814923      | 2.814923      |
| fr2         | 2.221007  | 2.221007 | 2.221007      |              | HCC-366      | 2.5302205    | 2.335572857  | 2.597023      | 2.597023      | 2.733478      | 2.733478      |
| KHOS/NP     | 2.220299  | 2.220299 | 2.220299      |              | SW 1463      | 2.527391     | 2.533177857  | 2.84117       | 2.474148      | 2.474148      | 2.527391      |
| DOK         | 2.217758  | 2.217758 | 2.217758      |              | MOLT-4F      | 2.527259     | 2.464744857  | 2.509768      | 2.538569      | 2.538569      | 2.64501       |
| MKN1        | 2.217196  | 2.217196 | 2.217196      |              | SW-1710      | 2.52394      | 2.505554929  | 2.506526      | 2.667992      | 2.52394       | 2.667992      |
| COR-L 105   | 2.2156705 | 2.221822 | 2.209519      |              | HCC-15       | 2.5105875    | 2.505424286  | 2.525672      | 2.525672      | 2.495503      | 2.495503      |
| SNU-16      | 2.215644  | 2.215644 | 2.215644      |              | PLC/PRF/5    | 2.49792      | 2.456491357  | 2.245372      | 2.284199      | 2.49792       | 2.505933      |
| Detroit 562 | 2.2156035 | 2.188513 | 2.242694      |              | A375.S2      | 2.495648     | 2.555792429  | 2.800967      | 2.639201      | 2.495648      | 2.639201      |
| SK-MES      | 2.21513   | 2.225454 | 2.204806      |              | COR-L279     | 2.488386     | 2.366638286  | 2.588906      | 2.588906      | 2.529565      | 2.529565      |
| SBC-5       | 2.214679  | 2.214679 | 2.214679      |              | COLO 685     | 2.486619     | 2.523850357  | 2.600001      | 2.600001      | 2.486619      | 2.851198      |
| Calu-1      | 2.211678  | 2.211678 | 2.211678      |              | FLYA13       | 2.482021     | 2.434360714  | 2.518738      | 2.518738      | 2.526838      | 2.526838      |
| NCI-H661    | 2.209774  | 2.209774 | 2.209774      |              | JHH-7        | 2.476583     | 2.507523714  | 2.622157      | 2.622157      | 2.622157      | 2.622157      |
| RO82-W-1    | 2.203892  | 2.203892 | 2.203892      |              | NCI-H1623    | 2.469236     | 2.424541714  | 2.348774      | 2.348774      | 2.271254      | 2.348774      |
| NCI-H2085   | 2.201606  | 2.201606 | 2.201606      |              | HGC-27       | 2.468389     | 2.442615429  | 2.468389      | 2.468389      | 2.468389      | 2.468389      |
| NCI-H1734   | 2.201175  | 2.201175 | 2.201175      |              | NCI-H2347    | 2.456307     | 2.456934214  | 2.425251      | 2.425251      | 2.425251      | 2.487363      |
| H33HJ-JA1   | 2.197728  | 2.197728 | 2.197728      |              | SKN          | 2.444542     | 2.398401571  | 2.688384      | 2.688384      | 2.477048      | 2.675114      |
| NCI-H2405   | 2.196812  | 2.196812 | 2.196812      |              | VMRC-LCP     | 2.444231     | 2.318382643  | 1.967939      | 2.548881      | 2.548881      | 2.563919      |
| C170        | 2.194628  | 2.194628 | 2.194628      |              | SAT          | 2.439669     | 2.372732786  | 1.970505      | 2.05088       | 2.439669      | 2.446993      |
| GRANTA-519  | 2.1942145 | 2.132991 | 2.255438      |              | CaR-1        | 2.439296     | 2.479265357  | 2.393655      | 2.393655      | 2.484937      | 2.629637      |
| D1.1        | 2.188067  | 2.188067 | 2.188067      |              | SW 900       | 2.437711     | 2.447624571  | 2.614799      | 2.614799      | 2.438046      | 2.438046      |
| HCC-78      | 2.186268  | 2.186268 | 2.186268      |              | Nthy-ori 3-1 | 2.43466      | 2.420241214  | 2.567926      | 2.567926      | 2.567926      | 2.567926      |
| NCI-H2347   | 2.185971  | 2.185971 | 2.185971      |              | NCI-H526     | 2.434635     | 2.449528357  | 2.489129      | 2.489129      | 2.434635      | 2.489129      |
| GA-10       | 2.180718  | 2.180718 | 2.180718      |              | HUP-T3       | 2.434586     | 2.438426929  | 2.280013      | 2.281152      | 2.281152      | 2.586082      |
| HARA        | 2.1764785 | 2.251633 | 2.101324      |              | BT-483       | 2.430152     | 2.444356357  | 2.370871      | 2.370871      | 2.370871      | 2.430152      |
| JSC-1       | 2.171044  | 2.117395 | 2.224693      |              | NCI-H2330    | 2.429767     | 2.341269929  | 2.454977      | 2.454977      | 2.429767      | 2.454977      |
| Hs 936.T    | 2.170917  | 2.170917 | 2.170917      |              | NCI-H711     | 2.427935     | 2.495495643  | 2.416498      | 2.416498      | 2.416498      | 2.439372      |
| MES-SA      | 2.166931  | 2.166931 | 2.166931      |              | NCI-H661     | 2.423557     | 2.370422     | 2.179769      | 2.179769      | 2.179769      | 2.192888      |

| ProbeSetID      | Median    | Mean     | SNP_A-1989988 | SNP_A-206887 | SNP_A-225288 | SNP_A-201261 | SNP_A-211913 | SNP_A-2222805 | SNP_A-2101835 | SNP_A-1989990 | SNP_A-4212396 |
|-----------------|-----------|----------|---------------|--------------|--------------|--------------|--------------|---------------|---------------|---------------|---------------|
| Affy_SNP.ID     |           |          | 2568889       | 6195985      | 9040198      | 4941856      | 6973989      | 8566536       | 6695364       | 2568944       | 2568952       |
| dbSNP           |           |          | rs763317      | rs12538489   | rs12718939   | rs7785313    | rs7789965    | rs759167      | rs729969      | rs723527      | rs10488140    |
| Chromosome      |           |          | 7             | 7            | 7            | 7            | 7            | 7             | 7             | 7             | 7             |
| Position        |           |          | 54869406      | 54874045     | 54879529     | 54887304     | 54887957     | 54901993      | 54902416      | 54909081      | 54912597      |
| Strand          |           |          | +             | +            | +            | -            | -            | +             | -             | +             | -             |
| Cytoband        |           |          | p11.2         | p11.2        | p11.2        | p11.2        | p11.2        | p11.2         | p11.2         | p11.2         | p11.2         |
| BU25 TK         | 2.1653915 | 2.15905  | 2.171733      |              | EJ138        | 2.422922     | 2.410984429  | 2.456726      | 2.435504      | 2.435504      | 2.435504      |
| PNT1A           | 2.164697  | 2.164697 | 2.164697      |              | HOS          | 2.419543     | 2.516425357  | 2.175659      | 2.114082      | 2.114082      | 2.175659      |
| ChaGo-K-1       | 2.161288  | 2.161288 | 2.161288      |              | KHM-3S       | 2.416223     | 2.379781714  | 2.416223      | 2.470192      | 2.416223      | 2.470192      |
| MKN74           | 2.1582565 | 2.181002 | 2.135511      |              | ChaGo-K-1    | 2.4103015    | 2.364104214  | 2.530214      | 2.498794      | 2.459705      | 2.459705      |
| T47D            | 2.154945  | 2.139789 | 2.170101      |              | H69V         | 2.404434     | 2.262584786  | 2.198173      | 2.596765      | 2.198173      | 2.479114      |
| EBC-1           | 2.154486  | 2.154486 | 2.154486      |              | Hs 936.T     | 2.401059     | 2.443547429  | 2.422012      | 2.422012      | 2.422012      | 2.401059      |
| NCI-H82         | 2.151055  | 2.14321  | 2.1589        |              | 201T         | 2.386913     | 2.374132286  | 2.682514      | 2.386913      | 2.338016      | 2.386913      |
| A2780 ADR       | 2.1489815 | 2.156113 | 2.14185       |              | SUIT-2       | 2.386862     | 2.354446929  | 2.242163      | 2.242163      | 2.31595       | 2.386862      |
| RERF-LC-Sq1     | 2.1489525 | 2.191349 | 2.106556      |              | NCI-H1792    | 2.3837015    | 2.387611786  | 2.647674      | 2.647674      | 2.647674      | 2.647674      |
| RT4             | 2.143004  | 2.143004 | 2.143004      |              | NCI-H460     | 2.366694     | 2.393000786  | 2.472642      | 2.438851      | 2.438851      | 2.472642      |
| HSC-3           | 2.142811  | 2.142811 | 2.142811      |              | SNU-398      | 2.36574      | 2.305664     | 2.389246      | 2.389246      | 2.389246      | 2.389246      |
| WPE1-NB26       | 2.141273  | 2.141273 | 2.141273      |              | COR-L95      | 2.365452     | 2.352801929  | 2.565722      | 2.461255      | 2.336154      | 2.39475       |
| KMRC-1          | 2.1410335 | 2.049164 | 2.232903      |              | SK-MES       | 2.365297     | 2.242536286  | 2.357327      | 2.373267      | 2.373267      | 2.400745      |
| NCI-H441        | 2.138112  | 2.097268 | 2.178956      |              | BFTC-905     | 2.363592     | 2.474462286  | 2.296046      | 2.742192      | 2.742192      | 2.742192      |
| NCI-H1573       | 2.133341  | 2.168006 | 2.098676      |              | EB1          | 2.3578555    | 2.347330071  | 2.336745      | 2.336745      | 2.336745      | 2.336745      |
| RERF-LC-KJ      | 2.130386  | 2.130386 | 2.130386      |              | CASKI        | 2.3549885    | 2.326869286  | 2.434089      | 2.403029      | 2.434089      | 2.434089      |
| K562/ADM        | 2.1287835 | 1.959582 | 2.297985      |              | HO-1-N-1     | 2.353416     | 2.264480214  | 2.397303      | 2.397303      | 2.412549      | 2.57071       |
| OSC-20          | 2.1246775 | 2.088858 | 2.160497      |              | PC-3 [JPC-3] | 2.352646     | 2.394180286  | 2.390695      | 2.352646      | 2.352646      | 2.352646      |
| SBC-3           | 2.124022  | 2.124022 | 2.124022      |              | TE7          | 2.351203     | 2.332805286  | 2.419905      | 2.419905      | 2.419905      | 2.419905      |
| RT112/84        | 2.1236595 | 2.151558 | 2.095761      |              | TASK1        | 2.346099     | 2.287112     | 2.450525      | 2.567073      | 2.567073      | 2.567073      |
| BFTC-905        | 2.121332  | 2.119029 | 2.123635      |              | NCI-H1734    | 2.3429835    | 2.330537429  | 2.142166      | 2.142166      | 2.38555       | 2.421227      |
| KHOS-240S       | 2.120358  | 2.120358 | 2.120358      |              | HRT-18       | 2.3415235    | 2.327379071  | 2.53151       | 2.528845      | 2.473757      | 2.473757      |
| HCE7            | 2.116809  | 2.060771 | 2.172847      |              | RT112/84     | 2.339449     | 2.333729     | 2.504105      | 2.34381       | 2.504105      | 2.504105      |
| NCI-H1522       | 2.114374  | 2.114374 | 2.114374      |              | CAL-29       | 2.3384115    | 2.358125429  | 2.120939      | 2.390431      | 2.464216      | 2.464216      |
| LNCaP clone FGC | 2.11103   | 2.11103  | 2.11103       |              | IMR-90       | 2.3380535    | 2.219999857  | 2.511207      | 2.623332      | 2.373584      | 2.373584      |
| SBC-2           | 2.1074895 | 2.183142 | 2.031837      |              | RO82-W-1     | 2.3379215    | 2.342567071  | 2.657811      | 2.498794      | 2.484534      | 2.484534      |
| NCI-H1703       | 2.103677  | 2.103677 | 2.103677      |              | NCI-H1581    | 2.335088     | 2.321850643  | 2.391061      | 2.335088      | 2.335088      | 2.391061      |
| LS174T          | 2.100028  | 2.100028 | 2.100028      |              | RT4          | 2.334754     | 2.227424     | 2.399816      | 2.389057      | 2.399816      | 2.399816      |
| NCI-H2023       | 2.099554  | 2.099554 | 2.099554      |              | HT 29        | 2.3175745    | 2.391541143  | 2.7243        | 2.7243        | 2.550503      | 2.550503      |
| NCI-H2171       | 2.097728  | 2.097728 | 2.097728      |              | KON          | 2.313129     | 2.282338857  | 2.323969      | 2.450463      | 2.450463      | 2.450463      |
| WIL2 NS         | 2.094127  | 2.094127 | 2.094127      |              | BT-20        | 2.3070205    | 2.272815214  | 2.415786      | 2.365385      | 2.365385      | 2.415786      |
| CaR-1           | 2.091204  | 1.993544 | 2.188864      |              | BU25 TK      | 2.295543     | 2.256701214  | 2.080256      | 2.080256      | 2.080256      | 2.355759      |
| HLE             | 2.090341  | 2.090341 | 2.090341      |              | RPMI-7951    | 2.295004     | 2.364569143  | 2.702635      | 2.695603      | 2.695603      | 2.695603      |
| HUP-T4          | 2.089963  | 2.089963 | 2.089963      |              | IHH-4        | 2.276764     | 2.226101286  | 1.996449      | 2.040514      | 2.083916      | 2.19475       |
| NL20-TA         | 2.087809  | 2.087809 | 2.087809      |              | fR2          | 2.267548     | 2.151334929  | 2.539443      | 2.475654      | 2.475654      | 2.475654      |
| RERF-LC-MA      | 2.085289  | 2.085289 | 2.085289      |              | CAL-51       | 2.264522     | 2.214289857  | 2.27835       | 2.27835       | 2.373495      | 2.373495      |
| LCLC-103H       | 2.084448  | 2.084448 | 2.084448      |              | COR-L 105    | 2.26032      | 2.257736357  | 2.248405      | 2.248405      | 2.248405      | 2.26032       |
| KYSE-270        | 2.08285   | 2.08285  | 2.08285       |              | LK-2         | 2.2595615    | 2.266311786  | 2.024236      | 2.024236      | 2.236374      | 2.278048      |
| NCI-H2286       | 2.0828265 | 2.033406 | 2.132247      |              | FU97         | 2.254841     | 2.294969643  | 2.173065      | 2.173065      | 2.51822       | 2.51822       |
| COR-L95         | 2.082528  | 2.082528 | 2.082528      |              | MOG-G-UVW    | 2.253695     | 2.213891643  | 2.486692      | 2.44834       | 2.44834       | 2.44834       |
| KYSE-140        | 2.0820655 | 2.091082 | 2.073049      |              | NCI-H2452    | 2.243583     | 2.280705929  | 2.188134      | 2.188134      | 2.17574       | 2.188134      |
| EB1             | 2.0820005 | 2.070474 | 2.093527      |              | HuCCT1       | 2.236575     | 2.2690245    | 2.246683      | 2.246683      | 2.36092       | 2.36092       |
| BICR22          | 2.080242  | 2.080242 | 2.080242      |              | NCI-H1417    | 2.234991     | 2.250631214  | 2.30286       | 2.068643      | 2.234991      | 2.234991      |
| SKN-3           | 2.07914   | 2.072711 | 2.085569      |              | Hs 633T      | 2.231598     | 2.162600714  | 2.312314      | 2.239337      | 2.231598      | 2.239337      |
| RERF-LC-Ad2     | 2.075355  | 2.075355 | 2.075355      |              | A-375        | 2.225076     | 2.229321929  | 2.179864      | 2.191309      | 2.179864      | 2.191309      |
| C8166           | 2.073969  | 2.034119 | 2.113819      |              | NCI-H1650    | 2.217624     | 2.248877857  | 2.552422      | 2.513949      | 2.513949      | 2.513949      |
| PC-9            | 2.067108  | 2.002437 | 2.131779      |              | KP-1N        | 2.2119685    | 2.252706     | 2.293454      | 2.502893      | 2.502893      | 2.530754      |

| ProbeSetID   | Median    | Mean     | SNP_A-1989988 | SNP_A-206887 | SNP_A-225288 | SNP_A-201261 | SNP_A-2119130 | SNP_A-2222805 | SNP_A-2101835 | SNP_A-1989990 | SNP_A-4212396 |
|--------------|-----------|----------|---------------|--------------|--------------|--------------|---------------|---------------|---------------|---------------|---------------|
| Affy_SNP.ID  |           |          | 2568889       | 6195985      | 9040198      | 4941856      | 6973989       | 8566536       | 6695364       | 2568944       | 2568952       |
| dbSNP        |           |          | rs763317      | rs12538489   | rs12718939   | rs7785313    | rs7789965     | rs759167      | rs729969      | rs723527      | rs10488140    |
| Chromosome   |           |          | 7             | 7            | 7            | 7            | 7             | 7             | 7             | 7             | 7             |
| Position     |           |          | 54869406      | 54874045     | 54879529     | 54887304     | 54887957      | 54901993      | 54902416      | 54909081      | 54912597      |
| Strand       |           |          | +             | +            | +            | -            | -             | +             | -             | +             | -             |
| Cytoband     |           |          | p11.2         | p11.2        | p11.2        | p11.2        | p11.2         | p11.2         | p11.2         | p11.2         | p11.2         |
| SW 1573      | 2.0585865 | 1.997604 | 2.119569      |              | NCI-H2135    | 2.211716     | 2.137554071   | 1.972968      | 1.972968      | 1.972968      | 1.972968      |
| SK-N-BE(2)   | 2.052679  | 2.052679 | 2.052679      |              | HT55         | 2.210316     | 2.257225071   | 2.486193      | 2.418233      | 2.336373      | 2.336373      |
| AZ-521       | 2.0481285 | 2.163293 | 1.932964      |              | NCI-H1781    | 2.209344     | 2.233240357   | 2.209344      | 2.209344      | 2.209344      | 2.553077      |
| NCI-H526     | 2.0465215 | 1.977144 | 2.115899      |              | RERF-GC-1B   | 2.20256      | 2.1819985     | 2.419768      | 2.352288      | 2.419768      | 2.419768      |
| A2780        | 2.043954  | 2.043954 | 2.043954      |              | NCI-H727     | 2.198523     | 2.193538286   | 2.192591      | 2.192591      | 2.192591      | 2.192591      |
| LU99A        | 2.042959  | 2.042959 | 2.042959      |              | 647-V        | 2.1977405    | 2.124148286   | 2.217624      | 2.278729      | 2.306923      | 2.306923      |
| CAL-85-1     | 2.0392425 | 1.811318 | 2.267167      |              | NCI-H2023    | 2.1952225    | 2.153250214   | 2.30147       | 2.248418      | 2.248418      | 2.30147       |
| KYSE-30      | 2.03482   | 2.024436 | 2.045204      |              | Calu-3       | 2.1951075    | 2.130328      | 1.907052      | 1.907052      | 1.907052      | 2.123884      |
| GCT          | 2.034148  | 2.034148 | 2.034148      |              | H69          | 2.194696     | 2.240359286   | 2.20811       | 2.194696      | 2.194696      | 2.20811       |
| SUIT-2       | 2.032365  | 2.032365 | 2.032365      |              | RWPE-1       | 2.188864     | 2.265799714   | 2.188864      | 2.188864      | 2.514432      | 2.514432      |
| Eos-HL-60    | 2.031894  | 2.031894 | 2.031894      |              | VMRC-LCD     | 2.187831     | 2.183962286   | 2.248656      | 2.127006      | 2.113167      | 2.248656      |
| NCI-H1417    | 2.029264  | 2.074441 | 1.984087      |              | T84          | 2.1878105    | 2.100313071   | 2.205397      | 2.205397      | 2.311136      | 2.311136      |
| IM-95        | 2.0284025 | 2.030767 | 2.026038      |              | SW 1116      | 2.1815105    | 2.224802929   | 2.66545       | 2.379561      | 2.379561      | 2.379561      |
| HGC-27       | 2.028153  | 2.028153 | 2.028153      |              | A373 C6      | 2.180846     | 2.13408       | 1.937818      | 1.937818      | 1.937818      | 2.102132      |
| SAT          | 2.0273125 | 1.924832 | 2.129793      |              | COLO 201     | 2.177844     | 2.169826429   | 2.06135       | 2.06135       | 2.06135       | 2.177844      |
| NCI-H196     | 2.02525   | 2.041253 | 2.009247      |              | KHOS/NP      | 2.177559     | 2.109167571   | 1.656028      | 1.656028      | 1.754421      | 1.755096      |
| IHH-4        | 2.01792   | 2.01792  | 2.01792       |              | Hs 891.T     | 2.163893     | 2.164133643   | 2.163893      | 2.163893      | 2.163893      | 2.163893      |
| Hs 633T      | 2.016787  | 2.016787 | 2.016787      |              | PA-TU-8988T  | 2.153719     | 2.009981643   | 2.318186      | 2.202117      | 2.194493      | 2.202117      |
| KMRC-20      | 2.015023  | 1.957138 | 2.072908      |              | BICR22       | 2.151134     | 2.171526714   | 2.151134      | 2.151134      | 2.151134      | 2.261598      |
| U-2 OS       | 2.014391  | 2.014391 | 2.014391      |              | MES-SA/Dx-5  | 2.1505655    | 2.082107357   | 2.318935      | 2.274207      | 2.149901      | 2.15123       |
| Hs 573.T     | 2.009837  | 2.009837 | 2.009837      |              | SK-MEL-1     | 2.149079     | 2.110367643   | 2.27124       | 2.076015      | 2.076015      | 2.222143      |
| SR           | 2.008005  | 1.992618 | 2.023392      |              | KYSE-70      | 2.1414645    | 2.233324643   | 2.442443      | 2.384919      | 2.384919      | 2.384919      |
| BALL-1       | 2.006312  | 2.006312 | 2.006312      |              | A673         | 2.141122     | 2.176495      | 2.522616      | 2.387026      | 2.535215      | 2.535215      |
| MG 63        | 2.005434  | 2.005434 | 2.005434      |              | D1.1         | 2.1368305    | 2.111685429   | 2.277328      | 1.996333      | 1.936093      | 1.936093      |
| NCI-H2330    | 2.00372   | 2.00372  | 2.00372       |              | NCI-H1793    | 2.1344265    | 2.102215571   | 1.899847      | 1.899847      | 1.899847      | 2.169285      |
| Hs 891.T     | 2.0034095 | 2.010182 | 1.996637      |              | OE19         | 2.130235     | 2.074995929   | 2.17176       | 2.17176       | 2.130235      | 2.130235      |
| NCI-H1435    | 1.999668  | 1.999668 | 1.999668      |              | WILCL        | 2.129159     | 2.044889429   | 2.361989      | 2.165228      | 2.159664      | 2.159664      |
| DMS 273      | 1.995235  | 1.995235 | 1.995235      |              | HCC-78       | 2.127448     | 2.050012071   | 1.790031      | 1.790031      | 1.790031      | 2.253008      |
| MES-SA/Dx-5  | 1.994888  | 1.994888 | 1.994888      |              | BEN          | 2.1264775    | 2.121312286   | 2.23539       | 2.23539       | 2.326997      | 2.326997      |
| Hs 852.T     | 1.99217   | 1.99217  | 1.99217       |              | Calu-1       | 2.1217       | 2.1226085     | 2.42104       | 2.229107      | 2.1217        | 2.229107      |
| Ishikawa     | 1.989319  | 1.989319 | 1.989319      |              | SK-N-BE(2)   | 2.121547     | 2.108961643   | 2.092381      | 2.092381      | 2.053982      | 2.092381      |
| COLO 741     | 1.988015  | 1.988015 | 1.988015      |              | HUP-T4       | 2.119334     | 2.171675643   | 2.225253      | 2.229134      | 2.577367      | 2.577367      |
| CAL-29       | 1.985363  | 1.985363 | 1.985363      |              | MCF7         | 2.113167     | 2.055814      | 2.390695      | 2.113167      | 2.113167      | 2.390695      |
| HCT-8        | 1.9822545 | 1.932743 | 2.031766      |              | Ishikawa     | 2.107752     | 2.118464643   | 2.107752      | 2.107752      | 2.107752      | 2.107752      |
| NCI-H1048    | 1.981663  | 1.981663 | 1.981663      |              | Hs 195.T     | 2.096249     | 2.024884714   | 2.096249      | 2.096249      | 2.096249      | 2.233288      |
| VM-CUB1      | 1.976048  | 1.944474 | 2.007622      |              | HT 1376      | 2.09322      | 2.115561      | 2.09322       | 2.09322       | 2.09322       | 2.09322       |
| AGS          | 1.975846  | 2.05452  | 1.897172      |              | COLO 205     | 2.091641     | 2.077503714   | 2.090788      | 2.090788      | 2.091641      | 2.091641      |
| SKG-IIIb     | 1.9745945 | 1.903459 | 2.04573       |              | NCI-H1437    | 2.0894955    | 2.049091214   | 2.038336      | 2.16953       | 2.16953       | 2.354037      |
| COLO 858     | 1.974016  | 1.974016 | 1.974016      |              | A2780        | 2.086899     | 2.094334714   | 2.086899      | 2.086899      | 1.942458      | 2.086899      |
| KYSE-150     | 1.969281  | 1.969281 | 1.969281      |              | A549         | 2.086801     | 2.091357429   | 2.296202      | 2.107599      | 2.107599      | 2.296202      |
| Nthy-ori 3-1 | 1.964961  | 1.964961 | 1.964961      |              | NCI-H1522    | 2.0813295    | 2.082866929   | 1.954516      | 1.954516      | 1.846785      | 1.954516      |
| WM-115       | 1.964202  | 1.964202 | 1.964202      |              | G-401        | 2.081199     | 2.069127643   | 2.1186        | 2.1186        | 2.1186        | 2.1186        |
| SW 13        | 1.963009  | 1.955644 | 1.970374      |              | PC-9         | 2.081056     | 2.04861       | 2.081056      | 2.081056      | 2.081056      | 2.081056      |
| P116 T       | 1.96163   | 1.96163  | 1.96163       |              | GRANTA-519   | 2.080312     | 2.073158786   | 2.080312      | 2.080312      | 2.080312      | 2.203542      |
| huH-1        | 1.960943  | 1.960943 | 1.960943      |              | 639-V        | 2.0775215    | 2.092880714   | 2.565876      | 2.302016      | 2.302016      | 2.302016      |
| SK-NEP-1     | 1.954531  | 1.954531 | 1.954531      |              | A2780 ADR    | 2.072101     | 2.119415643   | 2.261585      | 2.261585      | 2.158422      | 2.158422      |
| Hs 417.Lu    | 1.952082  | 1.952082 | 1.952082      |              | A-427        | 2.0718575    | 1.988570429   | 2.122972      | 2.142358      | 2.142358      | 2.142358      |

| ProbeSetID   | Median    | Mean     | SNP_A-1989988 | SNP_A-206887 | SNP_A-225288    | SNP_A-201261 | SNP_A-211913 | SNP_A-2222805 | SNP_A-2101835 | SNP_A-1989990 | SNP_A-4212396 |
|--------------|-----------|----------|---------------|--------------|-----------------|--------------|--------------|---------------|---------------|---------------|---------------|
| Affy_SNP.ID  |           |          | 2568889       | 6195985      | 9040198         | 4941856      | 6973989      | 8566536       | 6695364       | 2568944       | 2568952       |
| dbSNP        |           |          | rs763317      | rs12538489   | rs12718939      | rs7785313    | rs7789965    | rs759167      | rs729969      | rs723527      | rs10488140    |
| Chromosome   |           |          | 7             | 7            | 7               | 7            | 7            | 7             | 7             | 7             | 7             |
| Position     |           |          | 54869406      | 54874045     | 54879529        | 54887304     | 54887957     | 54901993      | 54902416      | 54909081      | 54912597      |
| Strand       |           |          | +             | +            | +               | -            | -            | +             | -             | +             | -             |
| Cytoband     |           |          | p11.2         | p11.2        | p11.2           | p11.2        | p11.2        | p11.2         | p11.2         | p11.2         | p11.2         |
| Hs 737.T     | 1.95195   | 1.95195  | 1.95195       |              | NB69            | 2.068502     | 2.1822505    | 2.381306      | 2.381306      | 2.007665      | 2.068502      |
| WILCL        | 1.9502925 | 1.975428 | 1.925157      |              | NCI-H2286       | 2.0673985    | 2.1009515    | 2.259529      | 2.319039      | 2.319039      | 2.319039      |
| A-375        | 1.949     | 1.904369 | 1.993631      |              | SBC-2           | 2.064498     | 2.035906571  | 2.06674       | 2.06674       | 2.06674       | 2.06674       |
| LC-1 sq      | 1.9466415 | 1.923084 | 1.970199      |              | HCT-8           | 2.063637     | 2.079253214  | 2.063637      | 2.063637      | 2.063637      | 2.172807      |
| NUGC-3       | 1.9372555 | 1.781096 | 2.093415      |              | Hs 895.T        | 2.063143     | 2.007857071  | 1.751529      | 1.821435      | 1.821435      | 1.968843      |
| PNT2         | 1.934278  | 1.934278 | 1.934278      |              | K562/ADM        | 2.0600015    | 2.028466857  | 2.140998      | 2.194332      | 2.272777      | 2.272777      |
| BICR 78      | 1.932758  | 1.932758 | 1.932758      |              | Hs 228.T        | 2.059343     | 1.972181429  | 2.107627      | 2.107627      | 2.107627      | 2.107627      |
| 273T         | 1.9230275 | 1.918042 | 1.928013      |              | STC 1           | 2.057322     | 2.039048643  | 1.819807      | 1.819807      | 2.057322      | 2.142221      |
| PLC/PRF/5    | 1.921557  | 1.921557 | 1.921557      |              | LNCAp clone F   | 2.052311     | 2.0496905    | 2.05309       | 2.043286      | 1.974161      | 2.043286      |
| MDST8        | 1.919812  | 1.878769 | 1.960855      |              | C8166           | 2.047845     | 2.077550643  | 2.462644      | 2.138112      | 2.078207      | 2.078207      |
| NCI-H1651    | 1.917938  | 1.917938 | 1.917938      |              | DMS 92          | 2.046383     | 2.1337025    | 2.09717       | 2.040258      | 2.040258      | 2.060001      |
| COR-L23      | 1.91724   | 1.91724  | 1.91724       |              | NCI-H2196       | 2.0449175    | 2.0819925    | 2.264772      | 2.264772      | 2.264772      | 2.275453      |
| HT 29        | 1.912529  | 1.905785 | 1.919273      |              | HMVII           | 2.044125     | 2.034169357  | 1.94612       | 1.94612       | 1.94612       | 2.00124       |
| J GAMMA 1    | 1.9121195 | 1.905144 | 1.919095      |              | Hs 417.Lu       | 2.038564     | 1.999182143  | 1.942649      | 1.942649      | 1.942649      | 2.038564      |
| Hs 908.T     | 1.905785  | 1.905785 | 1.905785      |              | H-EMC-SS        | 2.035751     | 1.955006429  | 2.224947      | 2.224947      | 2.155183      | 2.155183      |
| P31/FUJ      | 1.9031855 | 1.908437 | 1.897934      |              | H33HJ-JA1       | 2.034119     | 2.084017429  | 2.034119      | 2.034119      | 2.018809      | 2.034119      |
| RCM-1        | 1.901952  | 1.901952 | 1.901952      |              | HCT 116         | 2.032336     | 2.007684857  | 2.032336      | 2.032336      | 2.032336      | 2.032336      |
| Hs 834.T     | 1.901758  | 1.901758 | 1.901758      |              | GA-10           | 2.032023     | 2.036001071  | 1.890646      | 1.890646      | 2.135732      | 2.140573      |
| SW 48        | 1.899384  | 1.899384 | 1.899384      |              | NCI-H1666       | 2.028711     | 1.809154286  | 2.028711      | 2.028711      | 2.028711      | 2.140779      |
| DMS 153      | 1.8988655 | 1.888787 | 1.908944      |              | LS174T          | 2.0282345    | 2.047543429  | 2.241009      | 2.065105      | 2.036456      | 2.065105      |
| HOS          | 1.891313  | 1.89165  | 1.890976      |              | Hs 908.T        | 2.023521     | 2.037572429  | 2.023521      | 2.023521      | 2.023521      | 2.023521      |
| RWPE-1       | 1.8909905 | 1.891335 | 1.890646      |              | C170            | 2.0207925    | 2.020573143  | 2.262231      | 2.256758      | 2.070234      | 2.070234      |
| BICR10       | 1.887453  | 1.887453 | 1.887453      |              | J82             | 2.017933     | 1.879096571  | 2.10472       | 2.112654      | 2.112654      | 2.112654      |
| Hs 895.T     | 1.887108  | 1.887108 | 1.887108      |              | A2780cis        | 2.013759     | 2.007294429  | 2.242787      | 2.019583      | 1.876647      | 2.125305      |
| WIDR         | 1.886012  | 1.886012 | 1.886012      |              | OUS-11          | 2.013329     | 1.962009286  | 2.027082      | 2.09915       | 2.179281      | 2.179281      |
| A2058        | 1.885864  | 1.805058 | 1.96667       |              | KYSE-150        | 2.013228     | 1.975970357  | 1.908408      | 1.908408      | 1.908408      | 1.909971      |
| JURKAT EC-1  | 1.8828705 | 1.838512 | 1.927229      |              | COR-L23         | 2.011432     | 1.975228     | 2.011432      | 2.011432      | 2.011432      | 2.011432      |
| T.T          | 1.882799  | 1.882799 | 1.882799      |              | MS-1-L          | 2.010826     | 1.994067571  | 2.072402      | 2.072402      | 2.091878      | 2.091878      |
| OUS-11       | 1.881809  | 1.848413 | 1.915205      |              | SKG-IIIb        | 2.0046715    | 2.042940786  | 1.989029      | 2.048427      | 2.048427      | 2.214733      |
| SK-MEL-3     | 1.878393  | 1.878393 | 1.878393      |              | P32/ISH         | 2.0034955    | 2.0459235    | 2.016529      | 2.096347      | 2.096347      | 2.199681      |
| SW 1417      | 1.8775645 | 1.875608 | 1.879521      |              | NCI-H1693 (shij | 1.98761      | 2.0918535    | 2.372925      | 2.294561      | 2.294561      | 2.294561      |
| EPLC-272H    | 1.877083  | 1.877083 | 1.877083      |              | Hs 781.T        | 1.987479     | 1.985078143  | 2.146297      | 1.936521      | 1.936521      | 2.010671      |
| NCI-H1623    | 1.875367  | 1.875367 | 1.875367      |              | Hs 600.T        | 1.986741     | 1.980923429  | 2.36405       | 2.36405       | 2.36405       | 2.36405       |
| SVts-8       | 1.8724745 | 1.985537 | 1.759412      |              | Eos-HL-60       | 1.978554     | 1.970614857  | 1.978554      | 1.978554      | 2.077617      | 2.077617      |
| Hs 228.T     | 1.870225  | 1.870225 | 1.870225      |              | P116 T          | 1.975907     | 1.965617857  | 2.116148      | 2.116148      | 1.918294      | 1.918294      |
| NCI-H1437    | 1.869365  | 1.869365 | 1.869365      |              | 273T            | 1.975733     | 1.9910575    | 2.260333      | 2.157985      | 2.157985      | 2.260333      |
| 647-V        | 1.8670015 | 1.85549  | 1.878513      |              | NCI-H2172       | 1.974554     | 1.894567643  | 2.095817      | 2.052269      | 2.052269      | 2.052269      |
| HCT 116      | 1.866904  | 1.866904 | 1.866904      |              | KYSE-220        | 1.9735615    | 2.036028571  | 1.96575       | 1.96575       | 1.96575       | 1.96575       |
| NCI-H2228    | 1.859855  | 1.859855 | 1.859855      |              | Hs 852.T        | 1.9655375    | 1.933576714  | 1.760728      | 1.760728      | 1.760728      | 1.843924      |
| PC-3 [JPC-3] | 1.8587765 | 1.790605 | 1.926948      |              | AZ-521          | 1.963764     | 1.947559071  | 1.923261      | 1.923261      | 1.923261      | 2.004267      |
| NCI-H322     | 1.8566565 | 1.877686 | 1.835627      |              | NCI-H650        | 1.959056     | 2.0152965    | 2.375345      | 2.111266      | 1.959056      | 2.375345      |
| 23132/87     | 1.851999  | 1.851999 | 1.851999      |              | 23132/87        | 1.947479     | 1.731576571  | 2.071248      | 2.042959      | 2.042959      | 2.071248      |
| BT-549       | 1.8516385 | 1.806524 | 1.896753      |              | RKN             | 1.9466865    | 1.924271214  | 1.683528      | 1.798552      | 1.955761      | 1.955761      |
| G-402        | 1.837503  | 1.696379 | 1.978627      |              | HBE4-E6/E7      | 1.9431555    | 1.874076643  | 2.008197      | 1.960665      | 2.140435      | 2.140435      |
| FTC 133      | 1.835536  | 1.835536 | 1.835536      |              | NCI-H1299       | 1.940986     | 2.004233071  | 2.367354      | 2.147407      | 1.940986      | 1.940986      |
| HUP-T3       | 1.829175  | 1.829175 | 1.829175      |              | Hs 573.T        | 1.939159     | 1.989307     | 2.028196      | 1.939159      | 1.928339      | 1.939159      |
| NCI-H889     | 1.8165655 | 1.77093  | 1.862201      |              | Hs 737.T        | 1.933247     | 1.870785571  | 2.106403      | 2.027839      | 2.027839      | 2.106403      |

| ProbeSetID         | Median    | Mean     | SNP_A-1989988 | SNP_A-206887 | SNP_A-225288  | SNP_A-201261 | SNP_A-211913 | SNP_A-2222805 | SNP_A-2101835 | SNP_A-1989990 | SNP_A-4212396 |
|--------------------|-----------|----------|---------------|--------------|---------------|--------------|--------------|---------------|---------------|---------------|---------------|
| Affy_SNP.ID        |           |          | 2568889       | 6195985      | 9040198       | 4941856      | 6973989      | 8566536       | 6695364       | 2568944       | 2568952       |
| dbSNP              |           |          | rs763317      | rs12538489   | rs12718939    | rs7785313    | rs7789965    | rs759167      | rs729969      | rs723527      | rs10488140    |
| Chromosome         |           |          | 7             | 7            | 7             | 7            | 7            | 7             | 7             | 7             | 7             |
| Position           |           |          | 54869406      | 54874045     | 54879529      | 54887304     | 54887957     | 54901993      | 54902416      | 54909081      | 54912597      |
| Strand             |           |          | +             | +            | +             | -            | -            | +             | -             | +             | -             |
| Cytoband           |           |          | p11.2         | p11.2        | p11.2         | p11.2        | p11.2        | p11.2         | p11.2         | p11.2         | p11.2         |
| 22RV1              | 1.811395  | 1.811395 | 1.811395      |              | NCI-H2171     | 1.929906     | 1.968905857  | 1.929906      | 1.929906      | 1.884451      | 1.929906      |
| H3255              | 1.8106385 | 1.80728  | 1.813997      |              | G-402         | 1.928679     | 1.990094571  | 2.09111       | 2.09111       | 1.892803      | 2.09111       |
| 1321N              | 1.810554  | 1.84896  | 1.772148      |              | MEWO          | 1.923217     | 1.942139714  | 1.916022      | 1.916022      | 1.916022      | 1.923217      |
| CAL-51             | 1.804006  | 1.781594 | 1.826418      |              | CAL-120       | 1.921765     | 1.839351571  | 1.669342      | 1.680451      | 1.669342      | 1.680451      |
| Hs 751.T           | 1.803885  | 1.803885 | 1.803885      |              | AGS           | 1.916557     | 1.935016     | 1.916557      | 1.916557      | 1.916557      | 1.916557      |
| G-292 Clone A141B1 | 1.803766  | 1.786957 | 1.820575      |              | WIL2 NS       | 1.913585     | 1.902580429  | 1.976082      | 1.913585      | 1.913585      | 1.938246      |
| NCI-H711           | 1.802367  | 1.748335 | 1.856399      |              | COR-L 23/CPR  | 1.906858     | 1.921375     | 2.095649      | 1.878273      | 1.878273      | 1.906858      |
| BT-483             | 1.8011375 | 1.795797 | 1.806478      |              | GP5D          | 1.904712     | 1.889742357  | 1.924491      | 1.924491      | 1.924491      | 1.97726       |
| HT 728.T           | 1.794948  | 1.744602 | 1.845294      |              | MCAS          | 1.9018165    | 1.772718     | 1.673513      | 1.679194      | 1.890226      | 1.913407      |
| COLO 684           | 1.7927315 | 1.805722 | 1.779741      |              | COLO-680N     | 1.901206     | 1.887987286  | 1.952449      | 1.952449      | 1.901206      | 1.901206      |
| LS180              | 1.788976  | 1.788976 | 1.788976      |              | LS180         | 1.90016      | 1.869492143  | 2.134672      | 1.908586      | 1.90016       | 1.908586      |
| SK-N-FI            | 1.787812  | 1.787812 | 1.787812      |              | DMS 153       | 1.896005     | 1.889634286  | 1.947149      | 1.896005      | 1.896005      | 1.947149      |
| KYSE-220           | 1.785009  | 1.779165 | 1.790853      |              | SBC-3         | 1.894659     | 1.732911643  | 1.968318      | 1.894659      | 1.966567      | 1.966567      |
| KHOS-312H          | 1.7823285 | 1.796649 | 1.768008      |              | HT 728.T      | 1.885993     | 1.887304143  | 2.034718      | 1.991996      | 1.991996      | 2.034718      |
| Hs 781.T           | 1.77707   | 1.758157 | 1.795983      |              | SW 1573       | 1.884211     | 1.9192265    | 1.745957      | 1.884211      | 1.884211      | 1.985537      |
| HSC-4              | 1.772512  | 1.71386  | 1.831164      |              | MKN74         | 1.88246      | 1.874296286  | 1.869244      | 1.869244      | 1.869244      | 1.895676      |
| NCI-H2172          | 1.769977  | 1.769977 | 1.769977      |              | SAS           | 1.877083     | 1.973357714  | 1.853168      | 1.986392      | 2.189161      | 2.189161      |
| A375.S2            | 1.7648095 | 1.749909 | 1.77971       |              | MKN7          | 1.874679     | 1.813077     | 2.014391      | 1.956391      | 2.014391      | 2.014391      |
| KP-1N              | 1.763482  | 1.642588 | 1.884376      |              | RMG-I         | 1.8729565    | 1.807113286  | 1.957724      | 1.957724      | 1.839397      | 1.971336      |
| PC-14              | 1.761731  | 1.761731 | 1.761731      |              | SVts-8        | 1.867145     | 1.834762286  | 1.912113      | 1.867145      | 1.912113      | 1.912113      |
| ME-180             | 1.758172  | 1.758172 | 1.758172      |              | Hs 894(E).Lu  | 1.861021     | 1.853384071  | 1.827261      | 1.827261      | 1.800532      | 1.827261      |
| G-401              | 1.7564935 | 1.674078 | 1.838909      |              | Hs 751.T      | 1.859582     | 1.909508786  | 2.402402      | 2.30451       | 1.859582      | 1.859582      |
| DMS 92             | 1.754586  | 1.702926 | 1.806246      |              | SK-N-FI       | 1.850343     | 1.853057286  | 2.166182      | 1.889252      | 1.889252      | 2.065034      |
| HO-1-N-1           | 1.7542175 | 1.833259 | 1.675176      |              | NCI-H82       | 1.848263     | 1.859927214  | 2.079681      | 1.895901      | 1.895901      | 2.079681      |
| GP5D               | 1.7540665 | 1.742252 | 1.765881      |              | J GAMMA 1     | 1.847911     | 1.855349929  | 2.23919       | 2.020672      | 1.991678      | 1.991678      |
| SCC-4              | 1.750302  | 1.750302 | 1.750302      |              | HSC-4         | 1.845019     | 1.863611571  | 1.6889        | 1.82016       | 1.869878      | 1.98146       |
| VMRC-RCW           | 1.748681  | 1.748681 | 1.748681      |              | BT-549        | 1.8412445    | 1.874990357  | 2.06279       | 2.048143      | 1.948251      | 1.948251      |
| RERF-LC-MS         | 1.743687  | 1.743687 | 1.743687      |              | KYSE-30       | 1.834833     | 1.828907786  | 1.958046      | 1.958046      | 1.958046      | 1.958046      |
| SKN                | 1.739092  | 1.693588 | 1.784596      |              | Ca9-22        | 1.834222     | 1.854555929  | 1.792761      | 1.834222      | 1.838024      | 1.933422      |
| ABC-1              | 1.7333545 | 1.851999 | 1.61471       |              | NCI-H2405     | 1.8317355    | 1.822290714  | 2.121921      | 1.762828      | 1.762828      | 1.890137      |
| Hs 894(E).Lu       | 1.731201  | 1.59834  | 1.864062      |              | SNU-1         | 1.829466     | 1.857600857  | 2.04837       | 1.890646      | 1.890646      | 2.04837       |
| KOSC-2 cl3-43      | 1.72599   | 1.72599  | 1.72599       |              | BPH-1         | 1.822954     | 1.868315286  | 2.148065      | 1.968143      | 1.959012      | 1.959012      |
| SAS                | 1.7234445 | 1.668565 | 1.778324      |              | NCI-H1944     | 1.8136765    | 1.7780645    | 1.932433      | 1.879792      | 1.841654      | 1.879792      |
| Hs 195.T           | 1.723323  | 1.723323 | 1.723323      |              | HSC-2         | 1.810627     | 1.845119571  | 1.621988      | 1.915592      | 1.915592      | 1.915592      |
| HT1080             | 1.722561  | 1.722561 | 1.722561      |              | HICR 31       | 1.8103235    | 1.791867214  | 1.849811      | 1.870814      | 1.870814      | 1.870814      |
| NCI-H1650          | 1.722053  | 1.722053 | 1.722053      |              | KYSE-50       | 1.799248     | 1.779096786  | 1.799496      | 1.799496      | 1.753698      | 1.799248      |
| Hs 839.T           | 1.7179875 | 1.709811 | 1.726164      |              | NCI-H1915     | 1.785119     | 1.8673545    | 2.223692      | 2.223692      | 2.223692      | 2.223692      |
| LOU-NH91           | 1.715981  | 1.564817 | 1.867145      |              | D341 Med      | 1.772413     | 1.698846643  | 1.807218      | 1.807218      | 1.807218      | 1.807218      |
| C32                | 1.715628  | 1.715628 | 1.715628      |              | PE/CA-PJ15    | 1.7722435    | 1.805475286  | 2.05868       | 1.858749      | 1.858749      | 1.858749      |
| NCI-H1792          | 1.711836  | 1.711836 | 1.711836      |              | KYSE-510      | 1.7609535    | 1.770406429  | 1.666946      | 1.666946      | 1.666946      | 1.711868      |
| A431               | 1.7067945 | 1.678049 | 1.73554       |              | KOSC-2 cl3-43 | 1.756854     | 1.890756214  | 1.694086      | 1.723466      | 1.756854      | 2.187147      |
| PCI 4B             | 1.7057235 | 1.682223 | 1.729224      |              | OUMS-23       | 1.7526995    | 1.740450643  | 2.109655      | 2.107238      | 2.107238      | 2.107238      |
| NCI-H1155          | 1.703022  | 1.703022 | 1.703022      |              | HT1080        | 1.7494585    | 1.814138786  | 1.993616      | 1.993616      | 2.050696      | 1.993616      |
| HBE4-E6/E7         | 1.6954085 | 1.695032 | 1.695785      |              | JURKAT EC-1   | 1.748791     | 1.785515643  | 2.176785      | 1.875096      | 1.839748      | 1.825913      |
| NCI-H2452          | 1.6915975 | 1.622169 | 1.761026      |              | COR-L88       | 1.746288     | 1.664343214  | 1.867855      | 1.85743       | 1.846101      | 1.846101      |
| NCI-H358           | 1.683913  | 1.681933 | 1.685893      |              | DOK           | 1.744822     | 1.792563571  | 2.054761      | 1.939159      | 1.888383      | 1.816934      |
| NCI-H1944          | 1.6768705 | 1.67587  | 1.677871      |              | NCI-H838      | 1.736552     | 1.716605071  | 2.050993      | 1.849249      | 1.849249      | 1.849249      |

| ProbeSetID                 | Median    | Mean     | SNP_A-1989988 | SNP_A-206887 | SNP_A-225288               | SNP_A-201261 | SNP_A-211913 | SNP_A-2222805 | SNP_A-2101835 | SNP_A-1989990 | SNP_A-4212396 |
|----------------------------|-----------|----------|---------------|--------------|----------------------------|--------------|--------------|---------------|---------------|---------------|---------------|
| Affy_SNP.ID                |           |          | 2568889       | 6195985      | 9040198                    | 4941856      | 6973989      | 8566536       | 6695364       | 2568944       | 2568952       |
| dbSNP                      |           |          | rs763317      | rs12538489   | rs12718939                 | rs7785313    | rs7789965    | rs759167      | rs729969      | rs723527      | rs10488140    |
| Chromosome                 |           |          | 7             | 7            | 7                          | 7            | 7            | 7             | 7             | 7             | 7             |
| Position                   |           |          | 54869406      | 54874045     | 54879529                   | 54887304     | 54887957     | 54901993      | 54902416      | 54909081      | 54912597      |
| Strand                     |           |          | +             | +            | +                          | -            | -            | +             | -             | +             | -             |
| Cytoband                   |           |          | p11.2         | p11.2        | p11.2                      | p11.2        | p11.2        | p11.2         | p11.2         | p11.2         | p11.2         |
| OAW28                      | 1.6684815 | 1.648754 | 1.688209      |              | NCI-H358                   | 1.7251345    | 1.758348429  | 2.04259       | 1.843055      | 1.843055      | 2.04259       |
| Ishikawa (Heraklio) 02 ER- | 1.6645965 | 1.64084  | 1.688353      |              | NCI-H1048                  | 1.72264      | 1.709694714  | 1.823951      | 1.818102      | 1.799032      | 1.818102      |
| HMCB                       | 1.6525275 | 1.61532  | 1.689735      |              | ME-180                     | 1.712807     | 1.552682714  | 1.606851      | 1.826204      | 1.818763      | 1.826204      |
| SW 1463                    | 1.643089  | 1.630052 | 1.656126      |              | A431                       | 1.711788     | 1.7580915    | 1.555795      | 1.834329      | 2.055964      | 2.055964      |
| HT55                       | 1.640859  | 1.538866 | 1.742852      |              | Hs 834.T                   | 1.7024475    | 1.764145929  | 2.131186      | 2.002394      | 1.876572      | 2.002394      |
| AN3CA                      | 1.640333  | 1.640333 | 1.640333      |              | LS 123                     | 1.7023875    | 1.629909786  | 1.390687      | 1.47482       | 1.47482       | 1.718126      |
| OE21                       | 1.634574  | 1.593245 | 1.675903      |              | NCI-H1703                  | 1.697225     | 1.7182055    | 1.979441      | 1.940058      | 1.940058      | 1.979441      |
| TASK1                      | 1.631984  | 1.610981 | 1.652987      |              | VM-CUB1                    | 1.691614     | 1.709047143  | 1.952654      | 1.918754      | 1.793939      | 1.793939      |
| KYSE-520                   | 1.631298  | 1.631298 | 1.631298      |              | KYSE-180                   | 1.691582     | 1.566332714  | 1.892788      | 1.742079      | 1.742079      | 1.742079      |
| OCUM-1                     | 1.6309645 | 1.663754 | 1.598175      |              | NCI-H1435                  | 1.68673      | 1.649101643  | 1.68673       | 1.68673       | 1.68673       | 1.688434      |
| Ca9-22                     | 1.621495  | 1.621495 | 1.621495      |              | KYSE-450                   | 1.670808     | 1.687648357  | 1.878739      | 1.741479      | 1.687051      | 1.741479      |
| Hs 600.T                   | 1.6113275 | 1.612549 | 1.610106      |              | ABC-1                      | 1.6635725    | 1.665212857  | 1.631151      | 1.631151      | 1.631151      | 1.695994      |
| SW 900                     | 1.60389   | 1.60389  | 1.60389       |              | Ishikawa (Heraklio) 02 ER- | 1.660806     | 1.820513929  | 2.312314      | 2.312301      | 2.272803      | 2.272803      |
| HCC-366                    | 1.581444  | 1.581444 | 1.581444      |              | NUGC-3                     | 1.6583775    | 1.754460357  | 1.621594      | 1.621594      | 1.621594      | 1.630331      |
| BEN                        | 1.580338  | 1.496922 | 1.663754      |              | G-292 Clone A1             | 1.632151     | 1.819873429  | 2.284879      | 2.142015      | 2.142015      | 2.142015      |
| Hs 746T                    | 1.5696785 | 1.542825 | 1.596532      |              | U-2 OS                     | 1.621524     | 1.550534214  | 1.727877      | 1.727877      | 1.727877      | 1.743687      |
| HSC-2                      | 1.56527   | 1.56527  | 1.56527       |              | WI-26 VA4                  | 1.612912     | 1.722526357  | 2.075495      | 1.818271      | 2.075495      | 2.075495      |
| NCI-H1793                  | 1.556046  | 1.511365 | 1.600727      |              | HSC-3                      | 1.60895      | 1.720568786  | 1.544295      | 1.579158      | 1.589722      | 1.900101      |
| H-EMC-SS                   | 1.554018  | 1.543974 | 1.564062      |              | NCI-H1155                  | 1.606156     | 1.617121857  | 1.789892      | 1.758392      | 1.606156      | 1.758392      |
| COR-L 23/CPR               | 1.550807  | 1.513073 | 1.588541      |              | HLE                        | 1.602328     | 1.656423071  | 2.075861      | 1.865906      | 1.533309      | 1.865906      |
| BT-20                      | 1.5224575 | 1.496922 | 1.547993      |              | TCO-1                      | 1.5967445    | 1.629325714  | 1.786429      | 1.786429      | 1.783383      | 1.783383      |
| IMR-90                     | 1.5117595 | 1.630872 | 1.392647      |              | NCI-H2122                  | 1.5953045    | 1.601759429  | 1.501436      | 1.501436      | 1.501436      | 1.612302      |
| SNU-398                    | 1.497936  | 1.497936 | 1.497936      |              | HO-1-u-1                   | 1.584022     | 1.6465835    | 1.563542      | 1.604502      | 1.703646      | 1.878258      |
| RPMI-7951                  | 1.470438  | 1.46945  | 1.471426      |              | OVISE                      | 1.5777555    | 1.471765714  | 1.559427      | 1.625276      | 1.625276      | 1.633642      |
| HCC-827                    | 1.4694065 | 1.322405 | 1.616408      |              | JIMT-1                     | 1.569711     | 1.572775786  | 1.814166      | 1.569711      | 1.569711      | 1.569711      |
| J82                        | 1.4686905 | 1.544058 | 1.393323      |              | GCT                        | 1.559225     | 1.531814     | 1.559225      | 1.559225      | 1.559225      | 1.559225      |
| KYSE-70                    | 1.468114  | 1.468114 | 1.468114      |              | HCE7                       | 1.5537375    | 1.6148405    | 2.067093      | 1.764879      | 1.729082      | 1.764879      |
| NCI-H841                   | 1.4585645 | 1.448165 | 1.468964      |              | EPLC-272H                  | 1.5372735    | 1.428109571  | 1.554667      | 1.596516      | 1.596516      | 1.700815      |
| JHH-6                      | 1.4487305 | 1.473573 | 1.423888      |              | SKN-3                      | 1.5054765    | 1.490851429  | 1.524664      | 1.524664      | 1.619915      | 1.619915      |
| HCC-15                     | 1.41844   | 1.41844  | 1.41844       |              | NCI-H596                   | 1.50135      | 1.428170929  | 1.424804      | 1.424804      | 1.50135       | 1.50135       |
| NCI-H1568                  | 1.416904  | 1.416904 | 1.416904      |              | NL20-TA                    | 1.48882015   | 1.493631193  | 2.0274962     | 1.7099382     | 1.7099382     | 1.7099382     |
| LS 123                     | 1.4056445 | 1.284534 | 1.526755      |              | Hs 839.T                   | 1.486995     | 1.6536245    | 1.321401      | 1.911132      | 1.911132      | 2.101073      |
| 639-V                      | 1.3860315 | 1.329038 | 1.443025      |              | KYSE-270                   | 1.4817775    | 1.453861071  | 1.420345      | 1.333095      | 1.420345      | 1.481061      |
| T84                        | 1.3761225 | 1.264388 | 1.487857      |              | ASH-3                      | 1.45072175   | 1.241679157  | 1.4380864     | 1.5032531     | 1.5032531     | 1.5032531     |
| RKN                        | 1.3741605 | 1.295513 | 1.452808      |              | MG 63                      | 1.3840415    | 1.342891357  | 1.5996        | 1.5996        | 1.5996        | 1.5996        |
| NCI-H727                   | 1.3719525 | 1.291864 | 1.452041      |              | NCI-H522                   | 1.3650465    | 1.311362857  | 1.581811      | 1.581811      | 1.581811      | 1.581811      |
| CAL-148                    | 1.35256   | 1.355801 | 1.349319      |              | T.T                        | 1.336256     | 1.387053214  | 1.508527      | 1.482494      | 1.482494      | 1.482494      |
| HT 1376                    | 1.346498  | 1.346498 | 1.346498      |              | T47D                       | 1.322646     | 1.289987429  | 1.32811       | 1.32811       | 1.32811       | 1.334058      |
| TE7                        | 1.309042  | 1.30467  | 1.313414      |              | SCC-4                      | 1.322629     | 1.363823     | 1.218148      | 1.478901      | 1.478901      | 1.478901      |
| CAL-120                    | 1.2995455 | 1.274516 | 1.324575      |              | KYSE-520                   | 1.295384     | 1.345186857  | 1.526449      | 1.468964      | 1.295384      | 1.468964      |
| MOG-G-CCM                  | 1.286604  | 1.286604 | 1.286604      |              | RERF-LC-Sq1                | 1.2943443    | 1.204703271  | 1.5180389     | 1.5180389     | 1.4561719     | 1.4561719     |
| H69V                       | 1.256774  | 1.078268 | 1.43528       |              | PCI 4B                     | 1.28546145   | 1.178102836  | 1.4498418     | 1.2974278     | 1.4498418     | 1.2974278     |
| HuH-7                      | 1.2508275 | 1.235518 | 1.266137      |              | NCI-H1568                  | 1.254747     | 1.440961214  | 1.91577       | 1.794636      | 1.794636      | 1.794636      |
| MRK-nu-1                   | 1.2431475 | 1.227554 | 1.258741      |              | OSC-20                     | 1.25329      | 1.312805929  | 1.292123      | 1.113359      | 1.113359      | 1.495961      |
| KON                        | 1.19488   | 1.161622 | 1.228138      |              | RERF-LC-MA                 | 1.2352369    | 1.109684443  | 1.4273916     | 1.4273916     | 1.4273916     | 1.4273916     |
| OUMS-23                    | 1.159545  | 1.096972 | 1.222118      |              | BICR10                     | 1.225724     | 1.223030214  | 1.247097      | 1.208238      | 1.208238      | 1.225724      |
| TCO-1                      | 1.151825  | 1.151825 | 1.151825      |              | OE21                       | 1.2121205    | 1.190524143  | 1.228044      | 1.228044      | 1.228044      | 1.228044      |



| ProbeSetID  | Median     | Mean      | SNP_A-1989988 | SNP_A-206887 | SNP_A-2252883 | SNP_A-2012613 | SNP_A-2119130 | SNP_A-2222805 | SNP_A-2101835 | SNP_A-1989990 | SNP_A-4212396 |
|-------------|------------|-----------|---------------|--------------|---------------|---------------|---------------|---------------|---------------|---------------|---------------|
| Affy_SNP.ID |            |           | 2568889       | 6195985      | 9040198       | 4941856       | 6973989       | 8566536       | 6695364       | 2568944       | 2568952       |
| dbSNP       |            |           | rs763317      | rs12538489   | rs12718939    | rs7785313     | rs7789965     | rs759167      | rs729969      | rs723527      | rs10488140    |
| Chromosome  |            |           | 7             | 7            | 7             | 7             | 7             | 7             | 7             | 7             | 7             |
| Position    |            |           | 54869406      | 54874045     | 54879529      | 54887304      | 54887957      | 54901993      | 54902416      | 54909081      | 54912597      |
| Strand      |            |           | +             | +            | +             | -             | -             | +             | -             | +             | -             |
| Cytoband    |            |           | p11.2         | p11.2        | p11.2         | p11.2         | p11.2         | p11.2         | p11.2         | p11.2         | p11.2         |
| NCI-H1299   | 1.136823   | 1.136823  | 1.136823      |              | RERF-LC-Ad2   | 1.196541      | 1.216891214   | 1.105384      | 1.105384      | 1.105384      | 1.129069      |
| MCF7        | 1.111632   | 1.111632  | 1.111632      |              | SKOV3         | 1.0113754     | 1.005652571   | 0.9638997     | 0.9685444     | 0.9685444     | 0.9685444     |
| NCI-H596    | 1.082276   | 1.082276  | 1.082276      |              | T.Tn          | 0.9614609     | 0.92826555    | 0.9614609     | 0.9614609     | 1.0114567     | 1.019878      |
| COR-L88     | 1.0207988  | 0.9901213 | 1.0514763     |              | OAW28         | 0.9538827     | 0.988743093   | 0.7158246     | 0.6369229     | 0.7158246     | 0.9460151     |
| NCI-H2196   | 0.9397781  | 0.8724516 | 1.0071046     |              | NCI-H1563     | 0.947366      | 0.914825664   | 1.0949194     | 1.0865166     | 1.0949194     | 1.0949194     |
| PA-TU-8988T | 0.92865655 | 0.9271194 | 0.9301937     |              | PNT2          | 0.90216975    | 0.829820071   | 1.0213973     | 0.9739229     | 0.9739229     | 0.914327      |
| ASH-3       | 0.86861705 | 0.7290104 | 1.0082237     |              | NCI-N87       | 0.8192706     | 0.81994745    | 0.7912006     | 0.7372462     | 0.7912006     | 0.8192706     |
| H69         | 0.8183582  | 0.8183582 | 0.8183582     |              | NCI-H2228     | 0.7844841     | 0.692114007   | 0.813008      | 0.813008      | 0.813008      | 0.813008      |
| NCI-H1915   | 0.59179185 | 0.5044195 | 0.6791642     |              | MES-SA        | 0.6931083     | 0.711113443   | 0.6931083     | 0.6931083     | 0.5848332     | 0.6931083     |
| A673        | 0.5400225  | 0.5222913 | 0.5577537     |              | WPE1-NB26     | 0.60873945    | 0.59515735    | 0.7047713     | 0.7047713     | 0.7826116     | 0.7826116     |
| H69AR       | 0.44263765 | 0.4036942 | 0.4815811     |              | NCI-H322      | 0.5817452     | 0.548923157   | 0.7016281     | 0.6703033     | 0.6703033     | 0.6703033     |
| FU97        | 0.38777175 | 0.3312451 | 0.4442984     |              | LU99A         | 0.112633415   | 0.132148134   | 0.27500705    | 0.27500705    | 0.40326772    | 0.40326772    |

| ProbeSetID    | SNP_A-2135346 | SNP_A-4200418 | SNP_A-2166333 | SNP_A-1952822 | SNP_A-1896877 | SNP_A-4301045 | SNP_A-2050945 | SNP_A-4194333 | SNP_A-2259746 | SNP_A-4230238 | SNP_A-1989992 |
|---------------|---------------|---------------|---------------|---------------|---------------|---------------|---------------|---------------|---------------|---------------|---------------|
| Affy_SNP.ID   | 7217859       | 11481086      | 7664895       | 12588794      | 11787387      | 9465412       | 5926612       | 10390310      | 9140266       | 7909743       | 2569009       |
| dbSNP         | rs17586344    | rs17586365    | rs17172432    | rs4140770     | rs6960438     | rs17172438    | rs10244108    | rs7785013     | rs759169      | rs3735061     | rs2877260     |
| Chromosome    | 7             | 7             | 7             | 7             | 7             | 7             | 7             | 7             | 7             | 7             | 7             |
| Position      | 54914607      | 54914995      | 54915526      | 54915685      | 54916117      | 54925746      | 54926546      | 54926876      | 54928845      | 54938076      | 54945838      |
| Strand        | -             | +             | +             | -             | +             | +             | +             | +             | -             | -             | +             |
| Cytoband      | p11.2         |
| KYSE-520      | 6.44475       | 6.96283       | 6.96283       | 6.96283       | 6.96283       | 6.96283       | 6.96283       | 6.911036      | 6.66341       | 6.810133      | 6.810133      |
| OE21          | 6.538132      | 6.538132      | 6.538132      | 6.542427      | 6.542427      | 6.703002      | 6.763342      | 6.763342      | 6.763342      | 6.763342      | 6.763342      |
| H3255         | 6.410685      | 6.410685      | 6.410685      | 6.489619      | 6.489619      | 6.725333      | 6.725333      | 6.489619      | 6.410685      | 6.436391      | 6.387916      |
| NCI-H1573     | 5.669633      | 5.823272      | 5.823272      | 5.756219      | 5.823272      | 6.228164      | 6.228164      | 5.756219      | 5.756219      | 5.797845      | 5.797845      |
| HSC-2         | 6.042633      | 6.082549      | 6.082549      | 6.082549      | 6.082549      | 6.082549      | 6.082549      | 6.07028       | 5.862791      | 5.862791      | 5.862791      |
| HCC-827       | 5.817453      | 5.778581      | 5.778581      | 5.778581      | 5.817453      | 5.778581      | 5.718564      | 5.624093      | 5.624093      | 5.592099      | 5.592099      |
| Hs 852.T      | 5.523843      | 5.523843      | 5.523843      | 5.483529      | 5.483529      | 5.483529      | 5.483529      | 5.394872      | 5.394872      | 5.320132      | 5.225252      |
| KYSE-30       | 5.428478      | 5.528331      | 5.528331      | 5.370001      | 5.370001      | 5.370001      | 5.370001      | 5.22546       | 5.370001      | 5.370001      | 5.370001      |
| A431          | 4.952981      | 5.251607      | 5.251607      | 5.251607      | 5.449759      | 5.319466      | 5.406551      | 5.406551      | 5.406551      | 5.412951      | 5.412951      |
| BT-20         | 5.328966      | 5.396437      | 5.396437      | 5.396437      | 5.396437      | 5.396437      | 5.396437      | 5.212884      | 5.212884      | 5.165112      | 5.165112      |
| Ca9-22        | 4.749979      | 4.940741      | 4.940741      | 4.749979      | 4.749979      | 4.749979      | 4.801972      | 4.749979      | 4.64452       | 4.64452       | 4.64452       |
| NCI-H1568     | 4.676529      | 4.676529      | 4.676529      | 4.676529      | 4.676529      | 4.843599      | 4.843599      | 4.676529      | 4.676529      | 4.345007      | 4.345007      |
| PC-9          | 4.636894      | 4.636894      | 4.636894      | 4.636894      | 4.636894      | 4.636894      | 4.636894      | 4.621809      | 4.621809      | 4.411873      | 4.277177      |
| PNT1A         | 4.258236      | 4.267817      | 4.267817      | 4.178325      | 4.25082       | 4.25082       | 4.25082       | 4.178325      | 4.178325      | 4.25082       | 4.25082       |
| LUDLU-1       | 4.021817      | 4.021817      | 3.977944      | 3.977944      | 4.302562      | 4.33679       | 4.33679       | 4.302562      | 4.302562      | 4.302562      | 4.302562      |
| RERF-LC-MA    | 4.064202      | 4.168129      | 4.168129      | 4.168129      | 4.168129      | 4.140779      | 4.168129      | 4.168129      | 4.140779      | 4.085289      | 4.078277      |
| U373 MG       | 4.048313      | 4.048313      | 4.048313      | 4.048313      | 4.048313      | 4.048313      | 4.19363       | 3.932433      | 4.19363       | 4.19363       | 3.932433      |
| KYSE-450      | 3.815796      | 3.815796      | 3.815796      | 3.799071      | 3.799071      | 3.799071      | 3.799071      | 3.791148      | 3.799071      | 3.799071      | 3.839512      |
| KOSC-2 cl3-43 | 3.853418      | 3.853418      | 3.853418      | 3.853418      | 4.047412      | 3.853418      | 3.853418      | 3.853418      | 3.891889      | 3.891889      | 3.891889      |
| LU65          | 3.719899      | 3.767734      | 3.751521      | 3.719899      | 3.719899      | 3.719899      | 3.742142      | 3.719327      | 3.719327      | 3.719327      | 3.742142      |
| PC-14         | 3.906605      | 3.906605      | 3.902885      | 3.735516      | 3.735516      | 3.735516      | 3.735516      | 3.68137       | 3.68137       | 3.68137       | 3.68137       |
| NCI-H596      | 3.653337      | 3.653337      | 3.592797      | 3.592797      | 3.645819      | 3.653337      | 3.645819      | 3.592797      | 3.645819      | 3.553951      | 3.645819      |
| PC-3 [JPC-3]  | 3.798351      | 3.806077      | 3.806077      | 3.806077      | 3.806077      | 3.806077      | 3.806077      | 3.806077      | 3.806077      | 3.806077      | 3.759412      |
| 647-V         | 3.657458      | 3.657458      | 3.657458      | 3.657458      | 3.694535      | 3.694535      | 3.665173      | 3.665173      | 3.657458      | 3.633134      | 3.633134      |
| HSC-3         | 3.613514      | 3.743829      | 3.743829      | 3.613514      | 3.613514      | 3.574781      | 3.574781      | 3.405058      | 3.534462      | 3.278307      | 3.278307      |
| CASKI         | 3.469614      | 3.480862      | 3.536453      | 3.536453      | 3.574606      | 3.536453      | 3.497627      | 3.574606      | 3.497627      | 3.574606      | 3.574606      |
| JHH-4         | 3.655199      | 3.655199      | 3.655199      | 3.655199      | 3.655199      | 3.541971      | 3.655199      | 3.655199      | 3.655199      | 3.541971      | 3.541971      |
| CAL-85-1      | 3.638944      | 3.566452      | 3.566452      | 3.566452      | 3.566452      | 3.638944      | 3.566452      | 3.516086      | 3.516086      | 3.469467      | 3.469467      |
| BT-549        | 3.511322      | 3.512381      | 3.512381      | 3.511322      | 3.512381      | 3.518653      | 3.541819      | 3.511322      | 3.511322      | 3.406628      | 3.541819      |
| HSC-4         | 3.480836      | 3.480836      | 3.480836      | 3.480836      | 3.724958      | 3.480836      | 3.724958      | 3.724958      | 3.450828      | 3.253103      | 3.450828      |
| NUGC-4        | 3.889717      | 3.889717      | 3.889717      | 3.671848      | 3.671848      | 3.671848      | 3.671848      | 3.598175      | 3.671848      | 3.556417      | 3.444932      |
| BICR10        | 3.498425      | 3.498425      | 3.498425      | 3.565496      | 3.565496      | 3.565496      | 3.565496      | 3.565496      | 3.562107      | 3.498425      | 3.562107      |
| KYSE-140      | 3.6205        | 3.500964      | 3.609801      | 3.500964      | 3.500964      | 3.500964      | 3.500964      | 3.423342      | 3.500964      | 3.423342      | 3.423342      |
| SNU-5         | 3.495591      | 3.495591      | 3.420266      | 3.331158      | 3.420266      | 3.420266      | 3.461767      | 3.331158      | 3.331158      | 3.331158      | 3.418943      |
| SK-MEL-3      | 3.569896      | 3.649552      | 3.569896      | 3.569896      | 3.671889      | 3.671889      | 3.671889      | 3.569896      | 3.671889      | 3.671889      | 3.671889      |
| KYSE-180      | 3.306478      | 3.514559      | 3.514559      | 3.391391      | 3.391391      | 3.391391      | 3.400959      | 3.391391      | 3.391391      | 3.226931      | 3.391391      |
| PNT2          | 3.457522      | 3.578741      | 3.578741      | 3.457522      | 3.430399      | 3.430399      | 3.42269       | 3.344443      | 3.285994      | 3.285994      | 3.285994      |
| G-361         | 3.684526      | 3.684526      | 3.684526      | 3.504307      | 3.504307      | 3.684526      | 3.684526      | 3.504307      | 3.504307      | 3.419261      | 3.419261      |
| KYSE-220      | 3.865377      | 3.440758      | 3.440758      | 3.440758      | 3.440758      | 3.578799      | 3.578799      | 3.440758      | 3.278242      | 3.150044      | 3.150044      |
| WM-115        | 3.477138      | 3.578849      | 3.578849      | 3.477138      | 3.522324      | 3.522324      | 3.522324      | 3.477138      | 3.477138      | 3.304945      | 3.272539      |
| KYSE-50       | 3.407955      | 3.407955      | 3.407955      | 3.324356      | 3.324356      | 3.324356      | 3.324356      | 3.237999      | 3.237999      | 3.178913      | 3.178913      |
| OSC-20        | 3.270497      | 3.270497      | 3.270497      | 3.132013      | 3.270497      | 3.270497      | 3.270497      | 3.247106      | 3.270497      | 3.247106      | 3.366962      |

| ProbeSetID         | SNP_A-2135346 | SNP_A-4200418 | SNP_A-2166333 | SNP_A-1952822 | SNP_A-1896877 | SNP_A-4301043 | SNP_A-2050943 | SNP_A-4194333 | SNP_A-2259746 | SNP_A-4230238 | SNP_A-1989992 |
|--------------------|---------------|---------------|---------------|---------------|---------------|---------------|---------------|---------------|---------------|---------------|---------------|
| Affy_SNP.ID        | 7217859       | 11481086      | 7664895       | 12588794      | 11787387      | 9465412       | 5926612       | 10390310      | 9140266       | 7909743       | 2569009       |
| dbSNP              | rs17586344    | rs17586365    | rs17172432    | rs4140770     | rs6960438     | rs17172438    | rs10244108    | rs7785013     | rs759169      | rs3735061     | rs2877260     |
| Chromosome         | 7             | 7             | 7             | 7             | 7             | 7             | 7             | 7             | 7             | 7             | 7             |
| Position           | 54914607      | 54914995      | 54915526      | 54915685      | 54916117      | 54925746      | 54926546      | 54926876      | 54928845      | 54938076      | 54945838      |
| Strand             | -             | +             | +             | -             | +             | +             | +             | +             | -             | -             | +             |
| Cytoband           | p11.2         |
| SAT                | 3.241407      | 3.241407      | 3.241407      | 3.210638      | 3.241407      | 3.241407      | 3.371414      | 3.371414      | 3.371414      | 3.371414      | 3.499189      |
| NCI-H1650          | 3.518346      | 3.498253      | 3.484961      | 3.411823      | 3.410682      | 3.410682      | 3.280761      | 3.26993       | 3.26993       | 3.250625      | 3.226752      |
| SK-CO-1            | 3.566612      | 3.579901      | 3.579901      | 3.566612      | 3.400036      | 3.400036      | 3.400036      | 3.31009       | 3.31009       | 3.298624      | 3.298624      |
| NCI-H1792          | 3.37014       | 3.37014       | 3.210818      | 3.064305      | 3.210818      | 3.210818      | 3.097603      | 3.017324      | 3.037221      | 3.097603      | 3.210818      |
| NCI-H1703          | 3.091284      | 3.187826      | 3.254784      | 3.187826      | 3.254784      | 3.210372      | 3.343755      | 3.343755      | 3.343755      | 3.343755      | 3.343755      |
| PCI 4B             | 3.171588      | 3.235594      | 3.196797      | 3.196797      | 3.196797      | 3.139215      | 3.139215      | 3.139215      | 3.139215      | 3.139215      | 3.139215      |
| NCI-H1563          | 3.301327      | 3.309338      | 3.309338      | 3.191313      | 3.191313      | 3.191313      | 3.191313      | 3.165517      | 3.165517      | 2.929295      | 3.165517      |
| NCI-H841           | 3.132091      | 3.132091      | 3.052188      | 2.892354      | 3.052188      | 3.154253      | 3.198607      | 3.198607      | 2.747096      | 2.747096      | 2.865897      |
| LOU-NH91           | 3.217618      | 3.189097      | 3.189097      | 3.150625      | 3.189097      | 3.189097      | 3.189097      | 3.150625      | 3.131194      | 3.091937      | 3.150625      |
| HuH-7              | 3.09566       | 3.058333      | 3.058333      | 3.09566       | 3.174125      | 3.156129      | 3.174125      | 3.156129      | 3.248015      | 3.156129      | 3.248015      |
| LC-1 sq            | 3.090563      | 3.090563      | 3.090563      | 3.090563      | 3.081959      | 3.081959      | 3.081959      | 3.081959      | 3.13976       | 2.967719      | 3.244118      |
| NCI-H522           | 3.146846      | 3.146846      | 3.146846      | 2.843185      | 3.045447      | 3.146846      | 3.343293      | 3.25499       | 3.045447      | 3.045447      | 3.25499       |
| 201T               | 3.09712       | 3.09712       | 2.902449      | 2.876777      | 3.138729      | 3.206871      | 3.138729      | 2.876777      | 2.876777      | 2.876777      | 2.926805      |
| G-292 Clone A141B1 | 2.996675      | 2.996675      | 2.996675      | 2.996675      | 3.068352      | 3.178798      | 3.246704      | 3.178798      | 3.178798      | 3.178798      | 3.246704      |
| RPMI-7951          | 3.084605      | 3.090128      | 3.090128      | 3.084605      | 3.075119      | 3.090128      | 3.155249      | 3.075119      | 2.930215      | 2.930215      | 2.889567      |
| BEN                | 3.310704      | 3.310704      | 3.310704      | 3.310704      | 3.310704      | 3.189097      | 3.310704      | 3.169925      | 3.091937      | 3.072106      | 3.072106      |
| NCI-H2228          | 3.387308      | 3.387308      | 3.387308      | 3.244455      | 3.244455      | 3.387308      | 3.244455      | 2.920468      | 2.920468      | 2.871503      | 2.871503      |
| HCC-44             | 3.222571      | 3.232207      | 3.222571      | 3.086408      | 3.086408      | 3.086408      | 3.086408      | 3.034713      | 3.045739      | 3.034713      | 3.045739      |
| NCI-H1734          | 3.084288      | 3.084288      | 3.084288      | 3.065023      | 3.065023      | 3.409576      | 3.409576      | 3.065023      | 3.065023      | 3.050554      | 3.065023      |
| YKG-1              | 3.343058      | 3.216663      | 3.216663      | 3.176103      | 3.176103      | 3.176103      | 3.216663      | 3.176103      | 3.176103      | 3.06135       | 3.033795      |
| MOG-G-CCM          | 3.539163      | 3.539163      | 3.539163      | 3.471859      | 3.471859      | 3.471859      | 3.208959      | 3.059132      | 3.059132      | 2.86254       | 2.86254       |
| SK-BR-3            | 3.12143       | 3.082038      | 3.082038      | 3.042101      | 3.12143       | 3.12143       | 3.042101      | 3.021924      | 3.021924      | 3.021924      | 3.021924      |
| COLO 858           | 3.167885      | 3.267048      | 3.267048      | 3.167885      | 3.129868      | 3.129868      | 3.129868      | 3.086051      | 3.086051      | 3.086051      | 3.086051      |
| SCC-4              | 3.521353      | 3.521353      | 3.521353      | 3.521353      | 3.521353      | 3.401146      | 3.277575      | 2.968483      | 2.968483      | 2.91732       | 2.968483      |
| TE7                | 2.999687      | 2.999687      | 2.999687      | 2.999687      | 3.060421      | 3.060421      | 3.072852      | 3.072852      | 3.067934      | 3.067934      | 3.072852      |
| NCI-H1755          | 3.092628      | 3.092628      | 3.092628      | 3.080074      | 2.974829      | 2.974829      | 2.974829      | 2.972533      | 2.972533      | 2.78226       | 2.78226       |
| CaR-1              | 2.974674      | 2.948934      | 2.948934      | 2.918339      | 2.918339      | 2.918339      | 3.096893      | 3.096893      | 3.140528      | 3.140528      | 3.140528      |
| OVI5E              | 2.983398      | 2.983398      | 2.983398      | 2.952857      | 2.952857      | 2.952857      | 2.978038      | 2.76086       | 2.978038      | 2.978038      | 2.98711       |
| Calu-3             | 3.065731      | 3.142402      | 3.081483      | 3.065731      | 3.065731      | 3.065731      | 3.033321      | 2.960385      | 2.960385      | 2.960385      | 2.960385      |
| NCI-H1623          | 3.035015      | 3.035015      | 2.952411      | 3.035015      | 2.952411      | 3.07115       | 3.07115       | 3.07115       | 3.082603      | 2.793064      | 2.793064      |
| BICR 78            | 3.445063      | 3.445063      | 3.445063      | 3.254168      | 3.254168      | 3.203602      | 3.203602      | 3.103987      | 3.203602      | 3.103987      | 3.091729      |
| LS 123             | 2.98877       | 2.98877       | 3.021833      | 2.98877       | 2.98877       | 3.021833      | 2.940199      | 2.940199      | 2.940199      | 2.940199      | 2.946317      |
| AN3CA              | 3.209319      | 3.209319      | 3.098264      | 3.098264      | 3.113153      | 3.276333      | 3.276333      | 3.113153      | 3.113153      | 3.098264      | 3.098264      |
| 639-V              | 2.993201      | 2.981715      | 2.981715      | 2.981715      | 2.93198       | 2.93198       | 2.93198       | 2.93198       | 3.000034      | 3.000034      | 3.045247      |
| WM 266-4           | 3.117231      | 3.117231      | 3.054361      | 3.054361      | 3.054361      | 3.054361      | 3.054361      | 2.932147      | 3.054361      | 2.932147      | 2.932147      |
| SKN-3              | 3.089119      | 3.089119      | 3.089119      | 2.928416      | 2.928416      | 2.928416      | 3.029406      | 2.928416      | 3.029406      | 2.928416      | 3.029406      |
| NCI-H2085          | 3.113084      | 3.113084      | 3.113084      | 3.113084      | 3.113084      | 3.175959      | 3.113084      | 2.956287      | 2.956287      | 2.783821      | 2.783821      |
| RKN                | 3.073538      | 3.049893      | 3.049893      | 3.049802      | 3.073538      | 2.946472      | 2.946472      | 2.946472      | 2.946472      | 2.798058      | 2.946472      |
| MKN45              | 3.029497      | 3.029497      | 3.029497      | 2.992608      | 2.992608      | 2.745771      | 2.992608      | 2.745771      | 2.917551      | 2.917551      | 2.917551      |
| KHOS/NP            | 3.250765      | 3.296351      | 3.296351      | 3.061939      | 3.061939      | 3.018986      | 3.015112      | 2.902185      | 2.902185      | 3.015112      | 3.015112      |
| SNU-16             | 3.01634       | 3.005893      | 3.005893      | 2.945984      | 3.005893      | 3.005893      | 2.945984      | 2.899323      | 2.899323      | 2.899323      | 2.945984      |
| HCE7               | 2.973748      | 3.024403      | 3.024403      | 3.024403      | 3.024403      | 2.903451      | 2.903451      | 3.024403      | 2.934736      | 2.903451      | 2.934736      |
| OCUG-1             | 2.836196      | 2.836196      | 2.836196      | 2.836196      | 2.866464      | 2.866464      | 3.05363       | 3.05363       | 3.08614       | 3.05363       | 3.08614       |
| NL20-TA            | 2.93947       | 2.93947       | 2.93947       | 2.883583      | 2.93947       | 2.910762      | 2.910762      | 2.883583      | 2.883583      | 2.883583      | 2.910762      |
| KYSE-70            | 2.867169      | 2.866528      | 2.866528      | 2.866528      | 2.866528      | 2.866528      | 2.970544      | 2.866528      | 2.866528      | 2.895285      | 2.970544      |
| MOG-G-UVVW         | 3.087882      | 3.087882      | 3.042735      | 2.952794      | 2.952794      | 2.948934      | 2.865042      | 2.865042      | 2.865042      | 2.865042      | 2.865042      |
| NCI-H2342          | 2.894629      | 2.894629      | 2.860635      | 2.797719      | 2.797719      | 2.860635      | 3.12489       | 2.860635      | 2.860635      | 2.797719      | 2.797719      |

| ProbeSetID         | SNP_A-2135346 | SNP_A-4200418 | SNP_A-2166333 | SNP_A-1952822 | SNP_A-1896877 | SNP_A-4301043 | SNP_A-2050942 | SNP_A-4194333 | SNP_A-2259746 | SNP_A-4230238 | SNP_A-1989992 |
|--------------------|---------------|---------------|---------------|---------------|---------------|---------------|---------------|---------------|---------------|---------------|---------------|
| Affy_SNP.ID        | 7217859       | 11481086      | 7664895       | 12588794      | 11787387      | 9465412       | 5926612       | 10390310      | 9140266       | 7909743       | 2569009       |
| dbSNP              | rs17586344    | rs17586365    | rs17172432    | rs4140770     | rs6960438     | rs17172438    | rs10244108    | rs7785013     | rs759169      | rs3735061     | rs2877260     |
| Chromosome         | 7             | 7             | 7             | 7             | 7             | 7             | 7             | 7             | 7             | 7             | 7             |
| Position           | 54914607      | 54914995      | 54915526      | 54915685      | 54916117      | 54925746      | 54926546      | 54926876      | 54928845      | 54938076      | 54945838      |
| Strand             | -             | +             | +             | -             | +             | +             | +             | +             | -             | -             | +             |
| Cytoband           | p11.2         |
| ABC-1              | 3.150625      | 3.140926      | 3.111632      | 3.072106      | 3.072106      | 3.072106      | 3.072106      | 2.939772      | 2.897802      | 2.712288      | 2.712288      |
| NCI-H650           | 2.925675      | 2.911215      | 2.858761      | 2.794719      | 2.858761      | 2.858761      | 2.819032      | 2.794719      | 2.794719      | 2.819032      | 2.858761      |
| FTC 133            | 2.75963       | 2.886184      | 2.886184      | 2.886184      | 2.886184      | 2.727228      | 2.816935      | 2.816935      | 2.816935      | 2.816935      | 2.854504      |
| MDST8              | 2.853753      | 2.803163      | 2.803163      | 2.803163      | 2.803163      | 2.803163      | 2.803163      | 2.832804      | 2.832804      | 2.863203      | 2.887913      |
| KYSE-150           | 2.854032      | 2.852089      | 2.852089      | 2.820802      | 2.820802      | 2.852089      | 2.852089      | 2.820802      | 2.699953      | 2.595075      | 2.699953      |
| SW 48              | 2.915252      | 2.896681      | 2.753003      | 2.753003      | 2.866763      | 2.753003      | 2.753003      | 2.67929       | 2.67929       | 2.67929       | 2.67929       |
| NCI-H2023          | 3.029658      | 3.06171       | 3.06171       | 2.997217      | 2.849425      | 2.997217      | 2.997217      | 2.849425      | 2.849425      | 2.849425      | 2.741009      |
| COLO-680N          | 3.578991      | 3.535174      | 3.535174      | 3.152154      | 3.152154      | 3.106593      | 3.079558      | 2.881362      | 2.881362      | 2.881362      | 2.881362      |
| KP-4               | 3.113457      | 2.889514      | 2.889514      | 2.858707      | 2.8349        | 2.8349        | 2.8349        | 2.830803      | 2.8349        | 2.830803      | 2.8349        |
| SW-1710            | 3.088862      | 3.07501       | 3.07501       | 2.828271      | 2.828271      | 2.701334      | 2.527199      | 2.527199      | 2.527199      | 2.527199      | 2.828271      |
| KATO III           | 2.991032      | 3.003021      | 3.040995      | 2.905454      | 2.813345      | 2.813345      | 2.813345      | 2.728663      | 2.728663      | 2.589047      | 2.589047      |
| RERF-GC-1B         | 2.829895      | 2.871492      | 2.829895      | 2.741277      | 2.741277      | 2.741277      | 2.829895      | 2.741277      | 2.646094      | 2.646094      | 2.646094      |
| CAL-29             | 2.844175      | 2.790488      | 2.790488      | 2.790488      | 2.844175      | 2.811331      | 2.811331      | 2.790488      | 2.811331      | 2.811331      | 2.811331      |
| Sci-1              | 2.81144       | 2.845424      | 2.804648      | 2.727654      | 2.727654      | 2.727654      | 2.804648      | 2.727654      | 2.727654      | 2.727654      | 2.727654      |
| NCI-H810           | 3.1006        | 2.929305      | 2.929305      | 2.929305      | 3.039144      | 3.039144      | 3.039144      | 2.929305      | 2.929305      | 2.800201      | 2.800201      |
| T.Tn               | 2.803403      | 2.917436      | 2.803403      | 2.803403      | 2.803403      | 2.803403      | 2.803403      | 2.648515      | 2.803403      | 2.648515      | 2.648515      |
| DOK                | 2.992669      | 2.992669      | 2.707821      | 2.707821      | 2.707821      | 2.805252      | 2.67187       | 2.67187       | 2.67187       | 2.67187       | 2.849264      |
| COLO 741           | 2.91316       | 2.91316       | 2.91316       | 2.824728      | 2.91316       | 2.91316       | 2.91316       | 2.824728      | 2.824728      | 2.808684      | 2.808684      |
| NCI-H1651          | 2.786129      | 2.786129      | 2.786129      | 2.786129      | 2.778219      | 2.795332      | 2.814695      | 2.778219      | 2.732046      | 2.631318      | 2.631318      |
| RWPE-1             | 2.80242       | 2.80242       | 2.80242       | 2.80242       | 2.925539      | 2.966925      | 2.925539      | 2.925539      | 2.766043      | 2.66291       | 2.766043      |
| KYSE-270           | 2.844789      | 2.839423      | 2.839423      | 2.762888      | 2.742594      | 2.742594      | 2.762888      | 2.641385      | 2.641385      | 2.578489      | 2.641385      |
| NCI-H196           | 3.013204      | 3.076123      | 3.076123      | 2.647766      | 2.787766      | 3.080223      | 2.787766      | 2.736006      | 2.736006      | 2.729414      | 2.736006      |
| SK-LU-1            | 2.980021      | 2.980021      | 2.980021      | 2.937094      | 2.937094      | 2.937094      | 2.937094      | 2.818695      | 2.818695      | 2.771823      | 2.766452      |
| NCI-H1693 (ship16) | 2.831701      | 2.831701      | 2.831701      | 2.826722      | 2.688384      | 2.826722      | 2.826722      | 2.688384      | 2.641512      | 2.54591       | 2.490456      |
| NCI-H2135          | 2.743898      | 2.801294      | 2.743898      | 2.801294      | 2.801294      | 2.826267      | 2.826267      | 2.801294      | 2.739424      | 2.683915      | 2.739424      |
| VMRC-RCW           | 3.003877      | 2.910899      | 2.910899      | 2.910899      | 2.910899      | 2.878991      | 2.878991      | 2.732449      | 2.732449      | 2.70904       | 2.70904       |
| RERF-LC-Sq1        | 2.985706      | 3.022673      | 3.039667      | 3.022673      | 3.022673      | 3.039667      | 3.022673      | 2.632094      | 2.732214      | 2.732214      | 2.732214      |
| A375.S2            | 3.030668      | 2.950606      | 3.030668      | 2.89832       | 2.89832       | 2.89832       | 2.884985      | 2.640507      | 2.640507      | 2.570793      | 2.640507      |
| SW 1116            | 3.060481      | 3.047184      | 3.047184      | 2.887298      | 2.887298      | 2.887298      | 2.691292      | 2.606509      | 2.606509      | 2.578677      | 2.578677      |
| CAL-148            | 3.103396      | 2.972317      | 2.972317      | 2.972317      | 2.972317      | 2.972317      | 2.972317      | 2.972317      | 2.86971       | 2.823568      | 2.728069      |
| 22RV1              | 2.917677      | 2.917677      | 2.917677      | 2.751691      | 2.751691      | 2.578418      | 2.570591      | 2.541728      | 2.541728      | 2.541728      | 2.570591      |
| IM-95              | 2.860356      | 2.829516      | 2.860356      | 2.829516      | 2.829516      | 2.829516      | 2.829516      | 2.825975      | 2.811756      | 2.789939      | 2.726768      |
| HT 115             | 2.676803      | 2.743084      | 2.743084      | 2.72651       | 2.72651       | 2.72651       | 2.72651       | 2.72651       | 2.676803      | 2.72651       | 2.72651       |
| NCI-H727           | 3.13694       | 2.984609      | 2.984609      | 2.773754      | 2.773754      | 2.773754      | 2.721212      | 2.535743      | 2.721212      | 2.721212      | 2.721212      |
| T.T                | 2.79774       | 2.79774       | 2.79774       | 2.79774       | 2.79774       | 2.864925      | 2.864925      | 2.77169       | 2.77169       | 2.765135      | 2.765135      |
| OE33               | 2.740764      | 2.726006      | 2.726006      | 2.672418      | 2.726006      | 2.635835      | 2.635835      | 2.635835      | 2.635835      | 2.635835      | 2.71355       |
| PLC/PRF/5          | 2.658546      | 2.729492      | 2.75821       | 2.729492      | 2.729492      | 2.729492      | 2.75821       | 2.75821       | 2.729492      | 2.75821       | 2.780598      |
| SAS                | 2.883434      | 2.829938      | 2.829938      | 2.829938      | 2.829938      | 2.78525       | 2.829938      | 2.829938      | 2.829938      | 2.770354      | 2.770354      |
| MKN74              | 2.717288      | 2.717288      | 2.809501      | 2.71947       | 2.71947       | 2.71947       | 2.735871      | 2.71947       | 2.71947       | 2.614064      | 2.638692      |
| HMCB               | 2.343707      | 2.343707      | 2.270676      | 2.270676      | 2.270676      | 2.343707      | 2.343707      | 2.810558      | 2.343707      | 2.664935      | 2.664935      |
| A2058              | 2.98587       | 2.932231      | 2.932231      | 2.932231      | 2.932231      | 2.931113      | 2.931113      | 2.931113      | 2.926732      | 2.802048      | 2.802048      |
| HCC-366            | 2.947958      | 2.947958      | 2.947958      | 2.754436      | 2.754436      | 2.754436      | 2.745926      | 2.694957      | 2.694957      | 2.676061      | 2.676061      |
| P31/FUJ            | 2.78029       | 2.695229      | 2.695229      | 2.695229      | 2.695229      | 2.695229      | 2.698595      | 2.695229      | 2.695229      | 2.672578      | 2.672578      |
| SW 1417            | 2.814434      | 2.814434      | 2.814434      | 2.775243      | 2.775243      | 2.775243      | 2.762046      | 2.709818      | 2.706353      | 2.706353      | 2.706353      |
| KMRC-1             | 2.666206      | 2.666206      | 2.666206      | 2.666206      | 2.703912      | 2.673538      | 2.673538      | 2.555006      | 2.673538      | 2.673538      | 2.703912      |
| OAW42              | 2.814912      | 2.759708      | 2.759708      | 2.69617       | 2.69617       | 2.69617       | 2.69617       | 2.639675      | 2.556862      | 2.548929      | 2.556862      |
| PE/CA-PJ15         | 2.662264      | 2.662264      | 2.662264      | 2.602075      | 2.602075      | 2.602075      | 2.662264      | 2.662264      | 2.602075      | 2.602075      | 2.602075      |

| ProbeSetID   | SNP_A-2135346 | SNP_A-4200418 | SNP_A-2166333 | SNP_A-1952822 | SNP_A-1896877 | SNP_A-4301043 | SNP_A-2050943 | SNP_A-4194333 | SNP_A-2259746 | SNP_A-4230238 | SNP_A-1989994 |
|--------------|---------------|---------------|---------------|---------------|---------------|---------------|---------------|---------------|---------------|---------------|---------------|
| Affy_SNP.ID  | 7217859       | 11481086      | 7664895       | 12588794      | 11787387      | 9465412       | 5926612       | 10390310      | 9140266       | 7909743       | 2569009       |
| dbSNP        | rs17586344    | rs17586365    | rs17172432    | rs4140770     | rs6960438     | rs17172438    | rs10244108    | rs7785013     | rs759169      | rs3735061     | rs2877260     |
| Chromosome   | 7             | 7             | 7             | 7             | 7             | 7             | 7             | 7             | 7             | 7             | 7             |
| Position     | 54914607      | 54914995      | 54915526      | 54915685      | 54916117      | 54925746      | 54926546      | 54926876      | 54928845      | 54938076      | 54945838      |
| Strand       | -             | +             | +             | -             | +             | +             | +             | +             | -             | -             | +             |
| Cytoband     | p11.2         |
| NUGC-3       | 2.837405      | 2.817467      | 2.817467      | 2.817467      | 2.755391      | 2.755391      | 2.81328       | 2.755391      | 2.578146      | 2.520268      | 2.520268      |
| DMS 273      | 2.810612      | 2.814869      | 2.810612      | 2.759109      | 2.757711      | 2.810612      | 2.753225      | 2.676952      | 2.676952      | 2.651855      | 2.651855      |
| MKN1         | 2.797554      | 2.797554      | 2.797554      | 2.686998      | 2.749545      | 2.686998      | 2.749545      | 2.686998      | 2.686998      | 2.642413      | 2.642413      |
| RERF-LC-Ad2  | 2.86254       | 2.755491      | 2.755491      | 2.723222      | 2.723222      | 2.642667      | 2.642667      | 2.554791      | 2.642667      | 2.554791      | 2.554791      |
| TASK1        | 2.942739      | 2.729828      | 2.729828      | 2.729828      | 2.729828      | 2.655076      | 2.729828      | 2.729828      | 2.729828      | 2.655076      | 2.655076      |
| NCI-H23      | 2.751325      | 2.640172      | 2.640172      | 2.62612       | 2.618341      | 2.62612       | 2.62612       | 2.618341      | 2.618341      | 2.553791      | 2.590847      |
| KP-1N        | 2.890458      | 2.890458      | 2.890458      | 2.890458      | 2.890458      | 2.634724      | 2.634724      | 2.634724      | 2.623518      | 2.60679       | 2.623518      |
| NCI-H711     | 2.775431      | 2.775431      | 2.775431      | 2.702985      | 2.648688      | 2.648688      | 2.775431      | 2.618259      | 2.618259      | 2.618259      | 2.622425      |
| NCI-H661     | 2.839876      | 2.709604      | 2.709604      | 2.709604      | 2.702759      | 2.702759      | 2.702759      | 2.642402      | 2.642402      | 2.642402      | 2.621297      |
| EBC-1        | 2.757023      | 2.757023      | 2.757023      | 2.734742      | 2.734742      | 2.734742      | 2.734742      | 2.689657      | 2.632291      | 2.62068       | 2.62068       |
| JHH-6        | 2.661449      | 2.661449      | 2.661449      | 2.661449      | 2.616256      | 2.616256      | 2.616256      | 2.616256      | 2.661449      | 2.616256      | 2.779299      |
| NB69         | 2.609723      | 2.840501      | 2.840501      | 2.708351      | 2.708351      | 2.840501      | 2.840501      | 2.708351      | 2.708351      | 2.708351      | 2.708351      |
| SR           | 2.744132      | 2.810405      | 2.744132      | 2.720684      | 2.720684      | 2.720684      | 2.691145      | 2.662424      | 2.662424      | 2.66083       | 2.66083       |
| T84          | 2.604509      | 2.643925      | 2.643925      | 2.643925      | 2.643925      | 2.631886      | 2.604509      | 2.631886      | 2.604509      | 2.631886      | 2.643925      |
| HO-1-N-1     | 2.627502      | 2.627502      | 2.627502      | 2.627502      | 2.803468      | 2.803468      | 2.803468      | 2.803468      | 2.77179       | 2.77179       | 2.803468      |
| BALL-1       | 2.753936      | 2.753936      | 2.753936      | 2.753936      | 2.65773       | 2.65773       | 2.790268      | 2.790268      | 2.880693      | 2.532925      | 2.880693      |
| Nthy-ori 3-1 | 2.861887      | 2.811745      | 2.811745      | 2.671218      | 2.671218      | 2.671218      | 2.810122      | 2.671218      | 2.671218      | 2.612139      | 2.612139      |
| FTC 238      | 2.645045      | 2.599685      | 2.645045      | 2.599685      | 2.599685      | 2.599685      | 2.599685      | 2.4464        | 2.599685      | 2.4464        | 2.4464        |
| HuCC1        | 2.764659      | 2.742359      | 2.742359      | 2.742359      | 2.721436      | 2.721436      | 2.721436      | 2.700847      | 2.700847      | 2.595263      | 2.700847      |
| HOS          | 2.694538      | 2.701515      | 2.72192       | 2.72192       | 2.72192       | 2.72192       | 2.694538      | 2.493096      | 2.493096      | 2.493096      | 2.52382       |
| NCI-H2170    | 2.587636      | 2.587636      | 2.587636      | 2.587636      | 2.587636      | 2.825108      | 2.825108      | 2.450488      | 2.450821      | 2.450488      | 2.450821      |
| Hs 936.T     | 2.739257      | 2.739257      | 2.739257      | 2.706782      | 2.706782      | 2.739257      | 2.706782      | 2.441861      | 2.414761      | 2.318884      | 2.318884      |
| NCI-H1793    | 2.9002        | 2.9002        | 2.629938      | 2.582747      | 2.582747      | 2.629938      | 2.582747      | 2.397793      | 2.450315      | 2.450315      | 2.526093      |
| MRK-nu-1     | 2.719807      | 2.587859      | 2.587859      | 2.587859      | 2.587859      | 2.587859      | 2.719807      | 2.587859      | 2.58007       | 2.577449      | 2.577449      |
| KHOS-312H    | 2.846436      | 2.981171      | 2.846436      | 2.817185      | 2.817185      | 2.801251      | 2.569064      | 2.479847      | 2.479847      | 2.569064      | 2.584645      |
| LCLC-103H    | 2.80349       | 2.808335      | 2.720639      | 2.607854      | 2.670486      | 2.670486      | 2.670486      | 2.607854      | 2.607854      | 2.543019      | 2.564998      |
| H69V         | 2.873464      | 3.262218      | 3.36689       | 3.262218      | 3.262218      | 3.186182      | 3.186182      | 2.767624      | 2.767624      | 2.559905      | 2.559905      |
| GCT          | 2.564014      | 2.564014      | 2.607164      | 2.510651      | 2.607164      | 2.672738      | 2.672738      | 2.607164      | 2.607164      | 2.607164      | 2.607164      |
| COLO 857     | 2.695422      | 2.717771      | 2.717771      | 2.607971      | 2.607971      | 2.577945      | 2.607971      | 2.577945      | 2.577945      | 2.577945      | 2.577945      |
| RERF-LC-MS   | 2.822852      | 2.757023      | 2.757023      | 2.712288      | 2.712288      | 2.712288      | 2.712288      | 2.632291      | 2.632291      | 2.550014      | 2.550014      |
| MKN7         | 2.585563      | 2.585563      | 2.573762      | 2.477574      | 2.573762      | 2.597317      | 2.597317      | 2.477574      | 2.597317      | 2.477574      | 2.42825       |
| A-427        | 2.68388       | 2.66153       | 2.66153       | 2.66153       | 2.66153       | 2.558871      | 2.534808      | 2.534808      | 2.534808      | 2.534808      | 2.534808      |
| T47D         | 2.568306      | 2.659625      | 2.659625      | 2.659625      | 2.659625      | 2.577367      | 2.443767      | 2.443767      | 2.443767      | 2.443767      | 2.510155      |
| BT-483       | 2.592633      | 2.515964      | 2.515964      | 2.515964      | 2.509575      | 2.509575      | 2.502857      | 2.495977      | 2.495977      | 2.401599      | 2.445374      |
| SKN          | 2.827037      | 2.778385      | 2.778385      | 2.773313      | 2.773313      | 2.773313      | 2.752747      | 2.53615       | 2.53615       | 2.362409      | 2.53615       |
| HCC202       | 2.604673      | 2.604673      | 2.604673      | 2.604673      | 2.592868      | 2.461845      | 2.445856      | 2.39203       | 2.384451      | 2.384451      | 2.368726      |
| OCUM-1       | 2.62068       | 2.62068       | 2.62068       | 2.573762      | 2.573762      | 2.573762      | 2.573762      | 2.477574      | 2.62068       | 2.390695      | 2.378068      |
| NCI-H2122    | 2.703042      | 2.617863      | 2.617863      | 2.617863      | 2.617863      | 2.492184      | 2.492184      | 2.438715      | 2.492184      | 2.492184      | 2.505158      |
| HT 29        | 2.337246      | 2.480274      | 2.581439      | 2.477097      | 2.477097      | 2.477097      | 2.477097      | 2.477097      | 2.477097      | 2.477097      | 2.581439      |
| huH-1        | 2.658718      | 2.507265      | 2.507265      | 2.507265      | 2.507265      | 2.480336      | 2.480336      | 2.480336      | 2.480336      | 2.419942      | 2.419942      |
| HCC-15       | 2.487058      | 2.487058      | 2.487058      | 2.487058      | 2.578205      | 2.593925      | 2.611848      | 2.593925      | 2.578205      | 2.570994      | 2.570994      |
| KHOS-240S    | 2.624087      | 2.69312       | 2.641974      | 2.624087      | 2.624087      | 2.554315      | 2.432761      | 2.351458      | 2.351458      | 2.432761      | 2.554315      |
| JIMT-1       | 2.473781      | 2.467801      | 2.467801      | 2.467801      | 2.512548      | 2.467801      | 2.467801      | 2.467801      | 2.458241      | 2.467801      | 2.512548      |
| KON          | 2.595451      | 2.595451      | 2.595451      | 2.595451      | 2.463553      | 2.463553      | 2.586717      | 2.332814      | 2.586717      | 2.332814      | 2.586717      |
| COLO 853     | 2.624901      | 2.53724       | 2.605223      | 2.624901      | 2.624901      | 2.605223      | 2.605223      | 2.421598      | 2.516326      | 2.516326      | 2.457194      |
| U-2 OS       | 2.757023      | 2.700994      | 2.700994      | 2.700994      | 2.700994      | 2.700994      | 2.700994      | 2.643856      | 2.453017      | 2.453017      | 2.453017      |
| ME-180       | 2.693267      | 2.693267      | 2.693267      | 2.693267      | 2.650727      | 2.506357      | 2.506357      | 2.506357      | 2.448612      | 2.442938      | 2.448612      |

| ProbeSetID  | SNP_A-2135346 | SNP_A-4200418 | SNP_A-2166333 | SNP_A-1952822 | SNP_A-1896877 | SNP_A-4301043 | SNP_A-2050942 | SNP_A-4194333 | SNP_A-2259746 | SNP_A-4230238 | SNP_A-1989992 |
|-------------|---------------|---------------|---------------|---------------|---------------|---------------|---------------|---------------|---------------|---------------|---------------|
| Affy_SNP.ID | 7217859       | 11481086      | 7664895       | 12588794      | 11787387      | 9465412       | 5926612       | 10390310      | 9140266       | 7909743       | 2569009       |
| dbSNP       | rs17586344    | rs17586365    | rs17172432    | rs4140770     | rs6960438     | rs17172438    | rs10244108    | rs7785013     | rs759169      | rs3735061     | rs2877260     |
| Chromosome  | 7             | 7             | 7             | 7             | 7             | 7             | 7             | 7             | 7             | 7             | 7             |
| Position    | 54914607      | 54914995      | 54915526      | 54915685      | 54916117      | 54925746      | 54926546      | 54926876      | 54928845      | 54938076      | 54945838      |
| Strand      | -             | +             | +             | -             | +             | +             | +             | +             | -             | -             | +             |
| Cytoband    | p11.2         |
| FU97        | 2.459828      | 2.459828      | 2.459828      | 2.440152      | 2.440152      | 2.440152      | 2.440152      | 2.440152      | 2.440152      | 2.585999      | 2.675708      |
| Calu-1      | 2.5783        | 2.5783        | 2.528088      | 2.4839        | 2.528088      | 2.528088      | 2.528088      | 2.399313      | 2.399313      | 2.436149      | 2.528088      |
| NCI-H2452   | 2.912677      | 2.945329      | 2.945329      | 2.527775      | 2.527775      | 2.527775      | 2.527775      | 2.476767      | 2.476767      | 2.471895      | 2.471895      |
| UMC-11      | 2.701866      | 2.623343      | 2.623343      | 2.623343      | 2.619004      | 2.58521       | 2.457428      | 2.457428      | 2.182736      | 2.167067      | 1.938157      |
| COLO 684    | 2.404058      | 2.404058      | 2.310035      | 2.179417      | 2.371416      | 2.404058      | 2.371416      | 2.371416      | 2.317165      | 2.317165      | 2.317165      |
| SVts-8      | 2.8872133     | 2.8872133     | 2.8872133     | 2.8228525     | 2.844466      | 2.844466      | 2.844466      | 2.7791336     | 2.7791336     | 2.7791336     | 2.7791336     |
| HEC-1       | 2.616465      | 2.430301      | 2.430301      | 2.430301      | 2.430301      | 2.430301      | 2.430301      | 2.422174      | 2.422174      | 2.422174      | 2.399539      |
| A-375       | 2.592656      | 2.502141      | 2.502141      | 2.397768      | 2.592656      | 2.397768      | 2.397768      | 2.390305      | 2.397768      | 2.397768      | 2.598911      |
| OUMS-23     | 2.462336      | 2.462336      | 2.462336      | 2.34103       | 2.34103       | 2.34103       | 2.549609      | 2.316907      | 2.549609      | 2.316907      | 2.611953      |
| EJ138       | 2.656961      | 2.700168      | 2.705958      | 2.606884      | 2.606884      | 2.606884      | 2.399853      | 2.375953      | 2.375953      | 2.366312      | 2.366312      |
| HO-1-u-1    | 2.39266       | 2.39266       | 2.39266       | 2.39266       | 2.39266       | 2.39266       | 2.395492      | 2.39266       | 2.395492      | 2.395492      | 2.443841      |
| HT55        | 2.530346      | 2.530346      | 2.533417      | 2.454521      | 2.391842      | 2.391842      | 2.391842      | 2.391842      | 2.391842      | 2.391842      | 2.391842      |
| NCI-H2347   | 2.53458       | 2.53458       | 2.534568      | 2.534568      | 2.613551      | 2.613551      | 2.613551      | 2.613551      | 2.483705      | 2.249212      | 2.249212      |
| REFL-LC-KJ  | 2.736866      | 2.736866      | 2.736866      | 2.602707      | 2.602707      | 2.602707      | 2.602707      | 2.488033      | 2.488033      | 2.488033      | 2.602707      |
| COR-L279    | 2.730724      | 2.590129      | 2.590129      | 2.413361      | 2.413361      | 2.413361      | 2.413361      | 2.413361      | 2.413361      | 2.4376        | 2.413361      |
| SW 1573     | 2.374889      | 2.36377       | 2.36377       | 2.36377       | 2.374889      | 2.36377       | 2.36377       | 2.157425      | 2.157425      | 2.157425      | 2.41606       |
| SW 900      | 2.52834       | 2.528004      | 2.528004      | 2.486168      | 2.486168      | 2.528004      | 2.528004      | 2.486168      | 2.387657      | 2.319439      | 2.486168      |
| HT 1376     | 2.487631      | 2.477182      | 2.377663      | 2.362001      | 2.377663      | 2.377663      | 2.477182      | 2.477182      | 2.477182      | 2.477182      | 2.477182      |
| HUP-T3      | 2.529121      | 2.529121      | 2.529121      | 2.529121      | 2.464892      | 2.428274      | 2.464892      | 2.464892      | 2.464892      | 2.200381      | 2.464892      |
| STC 1       | 2.35359       | 2.35359       | 2.356945      | 2.356945      | 2.356945      | 2.393126      | 2.387316      | 2.356945      | 2.356945      | 2.356945      | 2.356945      |
| NCI-H2286   | 2.311874      | 2.290037      | 2.311874      | 2.311874      | 2.311874      | 2.410647      | 2.410647      | 2.341299      | 2.341299      | 2.341299      | 2.341299      |
| VMRC-LCD    | 2.643856      | 2.585563      | 2.585563      | 2.465322      | 2.465322      | 2.465322      | 2.585563      | 2.585563      | 2.585563      | 2.33985       | 2.33985       |
| H69AR       | 2.480726      | 2.480726      | 2.551766      | 2.480726      | 2.480726      | 2.551766      | 2.551766      | 2.300534      | 2.300534      | 2.118904      | 2.065076      |
| VMRC-LCP    | 2.76178       | 2.435529      | 2.435529      | 2.435529      | 2.435529      | 2.389145      | 2.389145      | 2.389145      | 2.380218      | 2.33487       | 2.33487       |
| FLYA13      | 2.515542      | 2.4576        | 2.4576        | 2.415211      | 2.415211      | 2.415211      | 2.415211      | 2.415211      | 2.397931      | 2.274574      | 2.274574      |
| HUP-T4      | 2.452117      | 2.421351      | 2.421351      | 2.308596      | 2.421351      | 2.260623      | 2.260623      | 2.260623      | 2.421351      | 2.40023       | 2.421351      |
| COR-L 105   | 2.341952      | 2.341952      | 2.341952      | 2.326598      | 2.326598      | 2.321698      | 2.317592      | 2.315278      | 2.306832      | 2.236002      | 2.315278      |
| KMRC-20     | 2.302951      | 2.235191      | 2.235191      | 2.182858      | 2.235191      | 2.235191      | 2.235191      | 2.366757      | 2.366757      | 2.366757      | 2.43173       |
| NCI-H2081   | 2.617456      | 2.529457      | 2.529457      | 2.491758      | 2.363108      | 2.363108      | 2.409371      | 2.345065      | 2.345065      | 2.317514      | 2.295681      |
| VM-CUB1     | 2.261282      | 2.344732      | 2.344732      | 2.320149      | 2.182276      | 2.182276      | 2.182276      | 2.182276      | 2.182276      | 2.182276      | 2.320149      |
| BU25 TK     | 2.496365      | 2.496365      | 2.496365      | 2.21729       | 2.14288       | 2.14288       | 2.171339      | 2.171339      | 2.21729       | 2.171339      | 2.21729       |
| RCM-1       | 2.523122      | 2.523122      | 2.523122      | 2.319581      | 2.290351      | 2.287897      | 2.287897      | 2.287897      | 2.287897      | 2.146105      | 2.287897      |
| NCI-H2172   | 2.351752      | 2.262178      | 2.229294      | 2.229294      | 2.229294      | 2.262178      | 2.262178      | 2.229294      | 2.229294      | 2.216554      | 2.216554      |
| SK-NEP-1    | 2.283689      | 2.283689      | 2.283689      | 2.283689      | 2.283689      | 2.378903      | 2.283689      | 2.283689      | 2.283689      | 2.283153      | 2.283689      |
| D1.1        | 2.375801      | 2.375801      | 2.506539      | 2.375801      | 2.099415      | 2.099415      | 2.114554      | 2.114554      | 2.124299      | 2.114554      | 2.114554      |
| NCI-H2196   | 2.394737      | 2.381381      | 2.381381      | 2.279764      | 2.280615      | 2.280615      | 2.280615      | 2.279764      | 2.280615      | 2.280615      | 2.280615      |
| NCI-H1435   | 2.322486      | 2.322486      | 2.325245      | 2.322486      | 2.325245      | 2.325245      | 2.325245      | 2.276947      | 2.276947      | 2.276947      | 2.276947      |
| GRANTA-519  | 2.713561      | 2.413474      | 2.413474      | 2.150394      | 2.444422      | 2.150394      | 2.150394      | 2.27561       | 2.31256       | 2.27561       | 2.27561       |
| SK-MES      | 2.486278      | 2.486278      | 2.508499      | 2.486278      | 2.486278      | 2.362205      | 2.379902      | 2.379902      | 2.379902      | 2.362205      | 2.357519      |
| NCI-H1437   | 2.264798      | 2.264798      | 2.264798      | 2.120496      | 2.120496      | 2.264798      | 2.256917      | 2.264798      | 2.264798      | 2.304795      | 2.304795      |
| BFTC-905    | 2.418183      | 2.259674      | 2.259674      | 2.259674      | 2.259674      | 2.259674      | 2.259674      | 2.259674      | 2.283193      | 2.306314      | 2.350002      |
| DMS 153     | 2.52028       | 2.289711      | 2.289711      | 2.491283      | 2.324549      | 2.324549      | 2.324549      | 2.324549      | 2.324549      | 2.03882       | 2.03882       |
| Detroit 562 | 2.228054      | 2.256824      | 2.256824      | 2.239549      | 2.226267      | 2.239549      | 2.256824      | 2.256824      | 2.256824      | 2.256824      | 2.256824      |
| RT4         | 2.382456      | 2.382456      | 2.382456      | 2.345052      | 2.345052      | 2.345052      | 2.382456      | 2.375561      | 2.375561      | 2.375561      | 2.338118      |
| 273T        | 2.186728      | 2.186728      | 2.186728      | 2.174695      | 2.186728      | 2.186728      | 2.241686      | 2.241686      | 2.241686      | 2.241686      | 2.208539      |
| SW 1463     | 2.40639       | 2.40639       | 2.40639       | 2.329058      | 2.329058      | 2.329058      | 2.329058      | 2.238128      | 2.329058      | 2.238128      | 2.329058      |
| H69         | 2.063214      | 2.151435      | 2.160074      | 2.160074      | 2.160074      | 2.151435      | 2.160074      | 2.289007      | 2.294118      | 2.294118      | 2.294118      |

| ProbeSetID      | SNP_A-2135346 | SNP_A-4200418 | SNP_A-2166333 | SNP_A-1952822 | SNP_A-1896877 | SNP_A-4301043 | SNP_A-2050943 | SNP_A-4194333 | SNP_A-2259746 | SNP_A-4230238 | SNP_A-1989994 |
|-----------------|---------------|---------------|---------------|---------------|---------------|---------------|---------------|---------------|---------------|---------------|---------------|
| Affy_SNP.ID     | 7217859       | 11481086      | 7664895       | 12588794      | 11787387      | 9465412       | 5926612       | 10390310      | 9140266       | 7909743       | 2569009       |
| dbSNP           | rs17586344    | rs17586365    | rs17172432    | rs4140770     | rs6960438     | rs17172438    | rs10244108    | rs7785013     | rs759169      | rs3735061     | rs2877260     |
| Chromosome      | 7             | 7             | 7             | 7             | 7             | 7             | 7             | 7             | 7             | 7             | 7             |
| Position        | 54914607      | 54914995      | 54915526      | 54915685      | 54916117      | 54925746      | 54926546      | 54926876      | 54928845      | 54938076      | 54945838      |
| Strand          | -             | +             | +             | -             | +             | +             | +             | +             | -             | -             | +             |
| Cytoband        | p11.2         |
| Hs 195.T        | 2.684495      | 2.684495      | 2.684495      | 2.684495      | 2.714316      | 2.684495      | 2.434399      | 2.37101       | 2.37101       | 2.37101       | 2.37101       |
| NCI-H1781       | 2.593749      | 2.417422      | 2.417422      | 2.417422      | 2.417422      | 2.363032      | 2.268626      | 2.198496      | 2.109016      | 2.103329      | 2.103329      |
| WIDR            | 2.451784      | 2.451784      | 2.451784      | 2.432761      | 2.234699      | 2.234699      | 2.229947      | 2.229947      | 2.229947      | 2.229947      | 2.229947      |
| SK-MEL-1        | 2.567915      | 2.567915      | 2.26086       | 2.257748      | 2.190472      | 2.257748      | 2.257748      | 2.190472      | 2.190472      | 2.190472      | 2.049902      |
| SUIT-2          | 2.462742      | 2.462742      | 2.462742      | 2.375763      | 2.357225      | 2.212777      | 2.212777      | 2.212777      | 2.212777      | 2.153378      | 2.153378      |
| WPE1-NB26       | 2.364342      | 2.364342      | 2.294639      | 2.273459      | 2.273459      | 2.294639      | 2.294639      | 2.273459      | 2.273459      | 2.104707      | 2.273459      |
| HCC-78          | 2.656788      | 2.656788      | 2.656788      | 2.616582      | 2.656788      | 2.656788      | 2.616582      | 2.594888      | 2.594888      | 2.47794       | 2.47794       |
| A549            | 2.301509      | 2.301509      | 2.301509      | 2.19754       | 2.19754       | 2.19754       | 2.201767      | 2.201767      | 2.201767      | 2.201767      | 2.201767      |
| LK-2            | 2.259753      | 2.259753      | 2.266141      | 2.083804      | 2.266141      | 2.083804      | 2.083804      | 2.274391      | 2.274391      | 2.274391      | 2.298519      |
| NCI-H2330       | 2.377207      | 2.377207      | 2.398308      | 2.398308      | 2.398308      | 2.377207      | 2.198132      | 2.198132      | 2.198132      | 2.198132      | 2.198132      |
| COLO 685        | 2.360028      | 2.310333      | 2.310333      | 2.310333      | 2.21145       | 2.310333      | 2.21145       | 2.08013       | 2.07098       | 2.1798351     | 2.1798351     |
| BICR22          | 2.379915      | 2.379915      | 2.446351      | 2.446351      | 2.446351      | 2.277943      | 2.277943      | 2.076409      | 2.108224      | 2.086451      | 2.086451      |
| MEWO            | 2.309996      | 2.309996      | 2.38406       | 2.38406       | 2.38406       | 2.38406       | 2.38406       | 2.309996      | 2.309996      | 2.38406       | 2.298337      |
| IHH-4           | 2.181084      | 2.181084      | 2.181084      | 2.162106      | 2.181084      | 2.181084      | 2.181084      | 2.301691      | 2.058849      | 2.190917      | 2.301691      |
| NCI-N87         | 2.161493      | 2.161493      | 2.221328      | 2.161493      | 2.161493      | 2.161493      | 2.094672      | 2.094672      | 2.094672      | 2.094672      | 2.011404      |
| KYSE-410        | 2.298454      | 2.288106      | 2.274653      | 2.252717      | 2.226761      | 2.226761      | 2.216206      | 2.186417      | 2.186417      | 2.176907      | 2.176907      |
| DMS 92          | 2.513393      | 2.513393      | 2.607526      | 2.513393      | 2.513393      | 2.182343      | 2.224373      | 2.398936      | 2.398936      | 2.292229      | 2.224373      |
| RO82-W-1        | 2.302107      | 2.453214      | 2.249927      | 2.226721      | 2.226721      | 2.222009      | 2.222009      | 2.222009      | 2.199237      | 2.199237      | 2.175428      |
| NCI-H82         | 2.170632      | 2.170632      | 2.166386      | 2.07122       | 2.060672      | 2.060672      | 2.060672      | 2.060672      | 2.060672      | 2.060672      | 2.150066      |
| C32             | 2.334536      | 2.223905      | 2.150216      | 2.125722      | 2.125722      | 2.150216      | 2.171556      | 2.171556      | 2.171556      | 2.171556      | 2.183697      |
| Hs 633T         | 2.211745      | 2.26789       | 2.26789       | 2.211745      | 2.26789       | 2.26789       | 2.26789       | 2.26789       | 2.26789       | 2.255636      | 2.255636      |
| NCI-H2405       | 2.214545      | 2.214545      | 2.214545      | 2.168414      | 2.122446      | 2.122446      | 2.118683      | 2.118683      | 2.071515      | 2.071515      | 2.132537      |
| Hs 895.T        | 2.364037      | 2.364037      | 2.141685      | 2.141685      | 2.142777      | 2.141685      | 2.188107      | 2.114277      | 2.114277      | 2.114277      | 2.114277      |
| MG 63           | 2.118254      | 2.175347      | 2.269874      | 2.269874      | 2.269874      | 2.175347      | 2.118254      | 2.118254      | 2.118254      | 2.269874      | 2.269874      |
| CAL-120         | 2.168863      | 2.168863      | 2.168863      | 2.190458      | 2.215269      | 2.190458      | 2.190458      | 2.222517      | 2.222517      | 2.299286      | 2.299286      |
| H33HJ-JA1       | 2.426383      | 2.440028      | 2.440028      | 2.31745       | 2.31745       | 2.31745       | 2.309853      | 2.309853      | 2.309853      | 2.297556      | 2.288041      |
| JSC-1           | 2.439508      | 2.439508      | 2.439508      | 2.432177      | 2.394611      | 2.230693      | 2.131158      | 2.131158      | 2.131158      | 2.126771      | 2.126771      |
| Hs 751.T        | 2.552124      | 2.344412      | 2.344412      | 2.225494      | 2.225494      | 2.225494      | 2.02931       | 1.934809      | 1.934809      | 1.888652      | 1.934809      |
| HMVII           | 2.245107      | 2.383277      | 2.245107      | 2.208579      | 1.965911      | 1.965911      | 2.208579      | 2.208579      | 2.208579      | 2.208579      | 1.959539      |
| fR2             | 2.238912      | 2.238912      | 2.215376      | 2.139019      | 2.139019      | 2.139019      | 2.139019      | 2.139019      | 2.139019      | 2.139019      | 2.129366      |
| COLO 201        | 2.382355      | 2.382355      | 2.382355      | 2.283127      | 2.283127      | 2.283127      | 2.382355      | 2.283127      | 2.283127      | 2.124672      | 2.124672      |
| NCI-H1915       | 2.416622      | 2.416622      | 2.377156      | 2.362116      | 2.345922      | 2.362116      | 2.362116      | 2.345922      | 2.315006      | 2.315006      | 2.345922      |
| IMR-90          | 2.525095      | 2.525095      | 2.525095      | 2.525095      | 2.509708      | 2.423507      | 2.509708      | 2.509708      | 2.394661      | 2.290298      | 2.290298      |
| RT112/84        | 2.439235      | 2.402916      | 2.402916      | 2.380522      | 2.380522      | 2.380522      | 2.209988      | 2.209988      | 2.31379       | 2.31379       | 2.209988      |
| Hs 894(E).Lu    | 2.236773      | 2.161997      | 2.047121      | 2.047121      | 2.047121      | 2.047121      | 2.047121      | 2.047121      | 2.047121      | 2.121091      | 2.126412      |
| LNCaP clone FGC | 2.156577      | 2.156577      | 2.156577      | 2.108322      | 2.156577      | 2.108322      | 2.108322      | 2.108322      | 1.956875      | 1.956875      | 1.916809      |
| NCI-H1581       | 2.111197      | 2.111197      | 2.111197      | 2.057152      | 2.050965      | 2.057152      | 2.057152      | 1.960797      | 1.960797      | 2.057152      | 2.163811      |
| HCT 116         | 2.032465      | 2.032465      | 2.042135      | 2.042135      | 2.055129      | 2.098676      | 2.098676      | 2.146407      | 2.146407      | 2.146407      | 2.146407      |
| Hs 228.T        | 2.331837      | 2.331837      | 2.376561      | 2.331837      | 2.331837      | 2.331837      | 2.331837      | 2.31626       | 2.31626       | 2.18635       | 2.18635       |
| JURKAT EC-1     | 2.096947      | 2.179796      | 2.179796      | 2.069755      | 1.983941      | 1.983941      | 2.069755      | 2.127751      | 2.069755      | 2.069755      | 2.069755      |
| SK-N-BE(2)      | 2.345602      | 2.332968      | 2.332968      | 2.332968      | 2.332968      | 2.332968      | 2.332968      | 2.304834      | 2.304834      | 2.210619      | 2.209197      |
| LS180           | 2.070122      | 2.070122      | 2.119015      | 1.926623      | 1.926623      | 1.926623      | 2.127986      | 2.130304      | 2.130304      | 2.20404       | 2.20404       |
| CAL-51          | 2.202883      | 2.185673      | 2.202883      | 2.185673      | 2.077996      | 2.077996      | 2.077996      | 2.23539       | 2.23539       | 2.172399      | 2.172399      |
| SKG-IIIb        | 2.195936      | 2.087795      | 2.087795      | 2.028596      | 2.028596      | 2.028596      | 2.028596      | 2.028596      | 2.150476      | 2.028596      | 2.150476      |
| P116 T          | 2.151996      | 2.17608       | 2.18612       | 2.17608       | 2.18612       | 2.18612       | 2.21153       | 2.21153       | 2.21153       | 2.21153       | 2.21153       |
| Hs 417.Lu       | 2.346984      | 2.29185       | 2.346984      | 2.177138      | 2.177138      | 2.346984      | 2.346984      | 2.177138      | 2.177138      | 2.177138      | 2.177138      |
| WIL2 NS         | 2.268021      | 2.24146       | 2.24146       | 2.000173      | 1.936727      | 1.936727      | 2.000173      | 2.000173      | 2.000173      | 2.000173      | 1.936727      |

| ProbeSetID  | SNP_A-2135346 | SNP_A-4200418 | SNP_A-2166333 | SNP_A-1952822 | SNP_A-1896871 | SNP_A-4301043 | SNP_A-2050943 | SNP_A-4194333 | SNP_A-2259746 | SNP_A-4230238 | SNP_A-1989992 |
|-------------|---------------|---------------|---------------|---------------|---------------|---------------|---------------|---------------|---------------|---------------|---------------|
| Affy_SNP.ID | 7217859       | 11481086      | 7664895       | 12588794      | 11787387      | 9465412       | 5926612       | 10390310      | 9140266       | 7909743       | 2569009       |
| dbSNP       | rs17586344    | rs17586365    | rs17172432    | rs4140770     | rs6960438     | rs17172438    | rs10244108    | rs7785013     | rs759169      | rs3735061     | rs2877260     |
| Chromosome  | 7             | 7             | 7             | 7             | 7             | 7             | 7             | 7             | 7             | 7             | 7             |
| Position    | 54914607      | 54914995      | 54915526      | 54915685      | 54916117      | 54925746      | 54926546      | 54926876      | 54928845      | 54938076      | 54945838      |
| Strand      | -             | +             | +             | -             | +             | +             | +             | +             | -             | -             | +             |
| Cytoband    | p11.2         |
| COR-L95     | 2.208472      | 2.208472      | 2.100794      | 2.084308      | 2.010944      | 2.010944      | 2.010944      | 2.010944      | 2.010944      | 2.010944      | 2.100794      |
| SK-N-FI     | 2.175509      | 2.209774      | 2.30997       | 2.209774      | 2.209774      | 2.175509      | 2.223385      | 2.175509      | 2.175509      | 2.094211      | 2.08041       |
| WILCL       | 2.323492      | 2.323492      | 2.323492      | 2.26547       | 2.26547       | 2.323492      | 2.091417      | 2.091417      | 2.091417      | 1.945738      | 1.945738      |
| P32/ISH     | 2.108613      | 2.066444      | 2.07364       | 2.07364       | 2.07364       | 2.07364       | 2.07364       | 2.107724      | 2.107724      | 2.102647      | 2.107724      |
| EPLC-272H   | 2.430338      | 2.343272      | 2.343272      | 2.343272      | 2.303211      | 2.212375      | 2.177911      | 2.177911      | 2.177911      | 2.069516      | 2.069516      |
| A2780 ADR   | 2.194574      | 2.194574      | 2.194574      | 2.066684      | 1.90331       | 1.90331       | 2.066684      | 2.066684      | 2.066684      | 2.066684      | 2.066684      |
| C8166       | 2.232051      | 2.232051      | 2.189026      | 1.94781       | 1.94781       | 1.978976      | 1.94781       | 1.94781       | 1.94781       | 1.946106      | 1.94781       |
| Hs 908.T    | 2.146599      | 2.073232      | 2.031809      | 2.014893      | 2.014893      | 2.031809      | 2.031809      | 2.014893      | 1.975122      | 1.975122      | 2.014893      |
| NCI-H322    | 2.173174      | 2.173174      | 2.241407      | 2.228627      | 2.228627      | 2.173174      | 2.20178       | 2.196327      | 2.196327      | 2.196327      | 2.196327      |
| NCI-H1417   | 2.754869      | 2.690373      | 2.690373      | 2.690373      | 2.405111      | 2.405111      | 2.405111      | 2.174573      | 1.824426      | 1.824426      | 1.817518      |
| HBE4-E6/E7  | 2.293024      | 2.180325      | 2.180325      | 2.150627      | 2.150627      | 2.150627      | 2.451512      | 2.451512      | 2.451512      | 2.451512      | 2.451512      |
| NCI-H1522   | 2.16851       | 2.050511      | 1.939999      | 1.939999      | 1.92          | 1.939999      | 1.939999      | 1.980646      | 1.939999      | 1.939999      | 1.980646      |
| LU99A       | 2.275007      | 2.275007      | 2.275007      | 2.275007      | 2.378068      | 2.275007      | 2.403268      | 2.168129      | 2.154486      | 2.154486      | 2.140779      |
| HCT-8       | 2.269244      | 2.267035      | 2.133997      | 2.054634      | 2.054634      | 2.054634      | 2.054634      | 2.054634      | 2.054634      | 2.054634      | 2.114263      |
| SBC-5       | 2.068065      | 2.055426      | 2.055426      | 1.915309      | 1.915309      | 1.915309      | 2.055426      | 2.055426      | 2.055426      | 1.952654      | 1.952654      |
| Ishikawa    | 2.192389      | 2.068868      | 2.068868      | 2.068868      | 1.89608       | 1.89608       | 2.107224      | 2.107224      | 2.150353      | 2.150353      | 2.208888      |
| U266B1      | 2.054096      | 2.054096      | 2.054096      | 2.067248      | 2.067248      | 2.141466      | 2.141466      | 2.142757      | 2.19363       | 2.141466      | 2.19363       |
| PA-TU-8988T | 2.175523      | 2.14288       | 2.14288       | 2.14288       | 2.14288       | 2.048497      | 2.048497      | 2.048497      | 2.048497      | 2.048497      | 2.048497      |
| HRT-18      | 2.293271      | 2.232503      | 2.232503      | 2.205598      | 2.205598      | 2.205598      | 2.196435      | 2.196435      | 2.196435      | 2.196435      | 2.134203      |
| C170        | 2.234512      | 2.234512      | 2.286578      | 2.234512      | 2.093136      | 2.047107      | 2.021331      | 2.021331      | 1.9244        | 2.021331      | 2.021331      |
| J GAMMA 1   | 2.043016      | 2.043016      | 2.043016      | 2.040471      | 1.756101      | 1.740579      | 1.756101      | 1.756101      | 1.756101      | 2.031609      | 1.982055      |
| LS174T      | 2.040812      | 2.172018      | 2.04259       | 2.040812      | 2.040812      | 2.040812      | 1.939027      | 1.939027      | 1.939027      | 2.040812      | 1.958778      |
| NCI-H526    | 2.203018      | 2.20131       | 2.203018      | 2.203018      | 2.09206       | 2.210833      | 2.210833      | 2.084924      | 2.084924      | 2.049476      | 2.049476      |
| HLE         | 2.10607       | 2.10607       | 2.10607       | 2.10607       | 2.072768      | 1.945841      | 1.945841      | 1.945841      | 1.951627      | 1.945841      | 1.951627      |
| 23132/87    | 2.208673      | 2.168129      | 2.071248      | 2.028711      | 2.014391      | 2.014391      | 2.014391      | 2.014391      | 2.014391      | 2.014391      | 2.014391      |
| Hs 834.T    | 2.085177      | 2.252941      | 2.055766      | 2.023879      | 1.973812      | 1.973812      | 1.973812      | 1.973812      | 1.973812      | 1.973812      | 2.012639      |
| Hs 891.T    | 2.217531      | 2.32451       | 2.32451       | 2.231212      | 2.231212      | 2.32451       | 2.320356      | 2.231212      | 2.231212      | 2.194345      | 2.076676      |
| Hs 839.T    | 2.800671      | 2.427404      | 2.427404      | 2.427404      | 2.427404      | 2.159009      | 2.159009      | 2.159009      | 2.159009      | 2.049263      | 2.049263      |
| SNU-1       | 2.23016       | 2.219162      | 2.219162      | 2.219162      | 2.195235      | 1.91311       | 1.91311       | 1.91311       | 1.91311       | 1.976388      | 2.004714      |
| EB1         | 2.050752      | 2.058439      | 2.050752      | 2.004555      | 1.832953      | 1.732882      | 1.732882      | 1.732882      | 1.732882      | 1.892354      | 2.000692      |
| NCI-H2009   | 2.168101      | 2.129669      | 2.129669      | 2.086073      | 2.040599      | 2.040599      | 2.040599      | 1.988783      | 2.040599      | 1.988783      | 2.040599      |
| NCI-H1048   | 2.014305      | 1.986378      | 1.986378      | 1.8791        | 1.986378      | 1.986378      | 2.092787      | 1.986378      | 1.8791        | 1.794357      | 1.8791        |
| A2780       | 1.985856      | 1.985856      | 1.985856      | 1.985856      | 1.983013      | 1.983013      | 1.983013      | 1.983013      | 1.983013      | 1.983013      | 2.063764      |
| NCI-H1666   | 1.806077      | 1.743687      | 1.61471       | 1.743687      | 1.743687      | 1.743687      | 1.897202      | 2.057138      | 2.057138      | 2.042959      | 2.042959      |
| G-402       | 2.057308      | 1.995871      | 2.057308      | 1.995871      | 1.995871      | 1.995871      | 1.995871      | 2.095286      | 2.095286      | 2.095286      | 2.130069      |
| JHH-7       | 2.077069      | 2.072247      | 2.072247      | 2.072247      | 2.063736      | 2.010239      | 2.010239      | 2.063736      | 2.010239      | 2.010239      | 2.010239      |
| OUS-11      | 2.160292      | 2.099025      | 2.014046      | 1.950439      | 1.942002      | 1.942002      | 1.942002      | 1.942002      | 1.942002      | 1.942002      | 1.942002      |
| AZ-521      | 2.320653      | 2.29939       | 2.118987      | 1.978932      | 1.967151      | 1.967151      | 1.978932      | 1.978932      | 2.051631      | 1.978932      | 1.978932      |
| K562/ADM    | 1.995365      | 1.995365      | 1.995365      | 1.995365      | 1.990187      | 1.990187      | 1.990187      | 1.990187      | 1.974715      | 1.900414      | 1.974715      |
| NCI-H889    | 2.846005      | 2.846005      | 2.846005      | 2.283689      | 2.283689      | 2.283689      | 2.343259      | 2.283689      | 2.283689      | 2.19278       | 2.143443      |
| OE19        | 1.878212      | 1.878212      | 1.971904      | 1.971904      | 1.974016      | 1.971904      | 1.878212      | 1.971904      | 1.907946      | 1.971904      | 1.971904      |
| HT 728.T    | 2.155238      | 2.132247      | 2.155238      | 2.08243       | 1.988102      | 1.67453       | 1.67453       | 1.784341      | 1.67453       | 1.67453       | 2.023406      |
| GA-10       | 1.822095      | 1.822095      | 1.774973      | 1.715516      | 1.715516      | 1.715516      | 1.774973      | 1.774973      | 1.774973      | 2.197297      | 2.197297      |
| Hs 737.T    | 1.953739      | 1.953739      | 2.012941      | 2.012941      | 2.012941      | 1.953739      | 1.948647      | 1.953739      | 1.948647      | 1.934145      | 1.934145      |
| NCI-H838    | 2.187972      | 2.101951      | 2.10351       | 2.101951      | 2.101951      | 2.101951      | 2.076156      | 2.007967      | 2.007967      | 1.98355       | 1.98355       |
| NCI-H1155   | 2.010527      | 1.969077      | 1.909197      | 1.899458      | 1.802108      | 1.746776      | 1.746776      | 1.899458      | 1.746776      | 1.802108      | 1.899458      |
| A2780cis    | 2.116952      | 1.972181      | 1.972181      | 1.955571      | 1.955571      | 1.955571      | 1.972181      | 1.972181      | 1.955571      | 1.955571      | 1.955571      |



| ProbeSetID                 | SNP_A-2135346 | SNP_A-4200418 | SNP_A-2166333 | SNP_A-1952822 | SNP_A-1896877 | SNP_A-4301043 | SNP_A-2050943 | SNP_A-4194333 | SNP_A-2259746 | SNP_A-4230238 | SNP_A-1989992 |
|----------------------------|---------------|---------------|---------------|---------------|---------------|---------------|---------------|---------------|---------------|---------------|---------------|
| Affy_SNP.ID                | 7217859       | 11481086      | 7664895       | 12588794      | 11787387      | 9465412       | 5926612       | 10390310      | 9140266       | 7909743       | 2569009       |
| dbSNP                      | rs17586344    | rs17586365    | rs17172432    | rs4140770     | rs6960438     | rs17172438    | rs10244108    | rs7785013     | rs759169      | rs3735061     | rs2877260     |
| Chromosome                 | 7             | 7             | 7             | 7             | 7             | 7             | 7             | 7             | 7             | 7             | 7             |
| Position                   | 54914607      | 54914995      | 54915526      | 54915685      | 54916117      | 54925746      | 54926546      | 54926876      | 54928845      | 54938076      | 54945838      |
| Strand                     | -             | +             | +             | -             | +             | +             | +             | +             | -             | -             | +             |
| Cytoband                   | p11.2         |
| G-401                      | 1.986276      | 1.985247      | 1.985247      | 1.952639      | 1.952639      | 1.952639      | 1.952639      | 1.985247      | 1.952639      | 2.011131      | 2.023163      |
| MS-1-L                     | 2.1996        | 2.134107      | 2.134107      | 1.952346      | 1.952346      | 1.952346      | 2.055186      | 1.952346      | 2.055186      | 1.952346      | 2.055186      |
| Hs 746T                    | 2.198833      | 2.055426      | 2.198833      | 2.055426      | 1.949352      | 1.929315      | 1.929315      | 1.830353      | 1.830353      | 1.830353      | 1.830353      |
| SW 13                      | 1.979441      | 1.979441      | 1.743419      | 1.625769      | 1.625769      | 1.985073      | 1.985073      | 1.985073      | 1.964757      | 1.76455       | 1.791706      |
| AGS                        | 2.02322       | 2.02322       | 2.02322       | 2.02322       | 2.02322       | 2.031495      | 2.039987      | 2.039987      | 2.039987      | 2.031495      | 1.886192      |
| NCI-H2171                  | 2.37913       | 2.350219      | 2.350219      | 2.173174      | 2.002653      | 2.002653      | 2.002653      | 1.96429       | 1.949015      | 1.942958      | 1.942958      |
| Hs 573.T                   | 2.408031      | 2.408031      | 2.408031      | 2.392093      | 2.392093      | 2.126536      | 2.126536      | 1.836788      | 1.942973      | 1.930985      | 1.930985      |
| HT1080                     | 1.581778      | 1.67104       | 1.67104       | 1.67104       | 1.67104       | 1.67104       | 1.833534      | 1.859203      | 1.833534      | 1.859203      | 2.068981      |
| COR-L 23/CPR               | 2.093681      | 1.924772      | 1.982795      | 1.924772      | 1.982795      | 1.924772      | 1.982795      | 1.924772      | 1.924772      | 1.924772      | 1.924772      |
| HGC-27                     | 1.962449      | 1.958792      | 1.958792      | 1.950571      | 1.895482      | 1.958792      | 1.958792      | 1.958792      | 1.958792      | 1.958792      | 2.035117      |
| SBC-3                      | 1.956875      | 1.956875      | 1.70526       | 1.70526       | 1.70526       | 1.70526       | 1.804857      | 1.804857      | 1.829007      | 1.804857      | 1.804857      |
| COLO 792                   | 2.106668      | 2.029739      | 2.029739      | 2.021302      | 2.021302      | 1.951143      | 1.915651      | 1.915651      | 1.915651      | 1.915651      | 1.915651      |
| H-EMC-SS                   | 2.48257       | 2.48257       | 2.48257       | 2.351611      | 2.351611      | 2.331001      | 2.232743      | 2.145117      | 2.232743      | 2.145117      | 2.145117      |
| J82                        | 2.160155      | 2.160155      | 2.160155      | 2.160155      | 2.160155      | 1.920742      | 2.144514      | 1.910432      | 1.910432      | 1.646031      | 1.910432      |
| Hs 600.T                   | 2.155798      | 2.052127      | 2.236533      | 2.236533      | 2.236533      | 1.80691       | 1.80691       | 1.80691       | 1.805151      | 1.805151      | 1.805151      |
| Hs 781.T                   | 2.413911      | 2.366922      | 2.366922      | 2.254342      | 2.254342      | 2.254342      | 2.169884      | 2.000707      | 2.000707      | 1.904757      | 1.904757      |
| BPH-1                      | 2.044366      | 1.977435      | 1.977435      | 1.924743      | 1.827384      | 1.827384      | 1.783523      | 1.724815      | 1.783523      | 1.724815      | 1.724815      |
| COR-L23                    | 2.293037      | 2.220459      | 2.220459      | 2.220459      | 1.914982      | 1.914982      | 2.08897       | 1.914982      | 1.914982      | 1.914982      | 1.914982      |
| A673                       | 1.733832      | 1.773896      | 1.773896      | 1.733832      | 1.733832      | 1.773896      | 1.831929      | 1.889162      | 1.773896      | 1.889162      | 2.036741      |
| COLO 205                   | 1.874433      | 1.874433      | 1.973113      | 1.874433      | 1.874433      | 1.874433      | 1.973113      | 2.109197      | 2.109197      | 2.109197      | 1.973113      |
| RMG-I                      | 2.175849      | 2.090481      | 2.090481      | 2.090481      | 1.91773       | 1.91773       | 2.090481      | 1.784191      | 2.090481      | 1.784191      | 2.090481      |
| WI-26 VA4                  | 2.008456      | 1.949499      | 1.949499      | 1.887483      | 1.887483      | 1.845735      | 1.845735      | 1.845735      | 1.845735      | 1.845735      | 1.845735      |
| Eos-HL-60                  | 1.890511      | 1.890511      | 1.890511      | 1.848245      | 1.853456      | 1.853456      | 1.853456      | 1.853456      | 1.853456      | 1.890511      | 1.890511      |
| GP5D                       | 2.040898      | 1.710672      | 2.040898      | 2.040898      | 1.710672      | 1.689044      | 1.689044      | 1.689044      | 1.689044      | 1.689044      | 1.689044      |
| MES-SA/Dx-5                | 1.974962      | 1.773225      | 1.773225      | 1.773225      | 1.773225      | 1.773225      | 1.773225      | 1.773225      | 1.773225      | 1.846861      | 1.846861      |
| SBC-2                      | 2.130166      | 2.052269      | 2.052269      | 2.052269      | 1.823383      | 1.823383      | 1.823383      | 1.783321      | 1.783321      | 1.74312       | 1.583328      |
| MCAS                       | 1.878664      | 1.863139      | 1.878664      | 1.863139      | 1.863139      | 1.851908      | 1.863139      | 1.863139      | 1.87627       | 1.863139      | 1.87627       |
| Ishikawa (Heraklio) 02 ER- | 1.833641      | 1.833641      | 1.833641      | 1.749767      | 1.740138      | 1.678887      | 1.678887      | 1.678887      | 1.678887      | 1.749767      | 1.815412      |
| MOLT-4F                    | 1.969849      | 1.967282      | 1.969849      | 1.969849      | 1.969849      | 1.753038      | 1.753038      | 1.790279      | 1.831195      | 1.831195      | 1.831195      |
| HARA                       | 1.973157      | 1.924757      | 1.924757      | 1.924757      | 1.973157      | 1.924757      | 1.924757      | 1.973157      | 1.924757      | 1.770243      | 1.770243      |
| NCI-H1944                  | 1.993689      | 1.993689      | 2.001212      | 1.993689      | 1.993689      | 1.820237      | 1.993689      | 1.997416      | 1.997416      | 2.021961      | 1.997416      |
| BICR 31                    | 1.814335      | 1.795472      | 1.795472      | 1.806879      | 1.806879      | 1.795472      | 1.795472      | 1.795472      | 1.806879      | 1.819485      | 1.819485      |
| D341 Med                   | 1.757482      | 1.751183      | 1.780333      | 1.751183      | 1.648493      | 1.751183      | 1.780333      | 1.780333      | 1.780333      | 1.751183      | 1.751183      |
| KHM-3S                     | 3.248595      | 3.020628      | 3.020628      | 3.020628      | 2.735357      | 2.542792      | 2.476094      | 2.06953       | 2.038379      | 1.84173       | 1.79781       |
| COR-L88                    | 1.857779      | 1.697148      | 1.851133      | 1.851133      | 1.851133      | 1.697148      | 1.697148      | 1.697148      | 1.697148      | 1.622745      | 1.622745      |
| NCI-H358                   | 1.72821       | 1.72821       | 1.72821       | 1.664289      | 1.664289      | 1.664289      | 1.707353      | 1.707353      | 1.707353      | 1.72821       | 1.72821       |
| 1321N                      | 2.072683      | 2.072683      | 1.863563      | 1.863563      | 1.83497       | 1.83497       | 2.011978      | 2.011978      | 2.011978      | 2.011978      | 1.941531      |
| KYSE-510                   | 1.811703      | 1.748902      | 1.748902      | 1.723006      | 1.573025      | 1.573025      | 1.723006      | 1.723006      | 1.723006      | 1.671897      | 1.671897      |
| TCO-1                      | 1.770946      | 1.702926      | 1.75178       | 1.75178       | 1.75178       | 1.75178       | 1.770946      | 1.85987       | 1.831378      | 1.85987       | 1.893866      |
| NCI-H441                   | 1.873604      | 1.872669      | 1.872669      | 1.661874      | 1.661874      | 1.661874      | 1.661874      | 1.519743      | 1.68422       | 1.648591      | 1.648591      |
| SNU-398                    | 1.767843      | 1.669519      | 1.669519      | 1.665391      | 1.661955      | 1.60187       | 1.661955      | 1.661955      | 1.661955      | 1.60187       | 1.669519      |
| NCI-H1299                  | 1.683222      | 1.683222      | 1.683222      | 1.641722      | 1.599517      | 1.641722      | 1.683222      | 1.683222      | 1.641722      | 1.589006      | 1.531765      |
| ASH-3                      | 1.4964415     | 1.4151733     | 1.4151733     | 1.4151733     | 1.331404      | 1.240009      | 1.240009      | 1.240009      | 1.240009      | 1.331404      | 1.456886      |
| MCF7                       | 1.283092      | 1.208143      | 1.208143      | 1.208143      | 1.150625      | 1.091937      | 1.091937      | 1.150625      | 1.091937      | 1.150625      | 1.150625      |
| SKOV3                      | 1.3220215     | 1.3220215     | 1.3597303     | 1.3597303     | 1.3597303     | 1.3597303     | 1.3597303     | 1.3650747     | 1.3597303     | 1.3597303     | 1.3597303     |
| ChaGo-K-1                  | 1.13213       | 0.9315729     | 0.9315729     | 0.3994263     | 0.3994263     | 0.3994263     | 0.3994263     | 0.3994263     | 0.3819881     | 0.3819881     | 0.7489773     |
| A373 C6                    | 0.7818635     | 0.7818635     | 0.7818635     | 0.7818635     | 0.8095883     | 0.7818635     | 0.7818635     | 0.8458438     | 0.7818635     | 0.8458438     | 0.8999572     |

| ProbeSetID         | SNP_A-2135346 | SNP_A-4200418 | SNP_A-2166333 | SNP_A-1952822 | SNP_A-1896877 | SNP_A-4301045 | SNP_A-2050945 | SNP_A-4194333 | SNP_A-2259746 | SNP_A-4230238 | SNP_A-1989997 |
|--------------------|---------------|---------------|---------------|---------------|---------------|---------------|---------------|---------------|---------------|---------------|---------------|
| <b>Affy_SNP.ID</b> | 7217859       | 11481086      | 7664895       | 12588794      | 11787387      | 9465412       | 5926612       | 10390310      | 9140266       | 7909743       | 2569009       |
| <b>dbSNP</b>       | rs17586344    | rs17586365    | rs17172432    | rs4140770     | rs6960438     | rs17172438    | rs10244108    | rs7785013     | rs759169      | rs3735061     | rs2877260     |
| <b>Chromosome</b>  | 7             | 7             | 7             | 7             | 7             | 7             | 7             | 7             | 7             | 7             | 7             |
| <b>Position</b>    | 54914607      | 54914995      | 54915526      | 54915685      | 54916117      | 54925746      | 54926546      | 54926876      | 54928845      | 54938076      | 54945838      |
| <b>Strand</b>      | -             | +             | +             | -             | +             | +             | +             | +             | -             | -             | +             |
| <b>Cytoband</b>    | p11.2         |
| MES-SA             | 0.9603825     | 0.8519282     | 0.8519282     | 0.8519282     | 0.7528253     | 0.9024908     | 0.9024908     | 0.7528253     | 0.7528253     | 0.7528253     | 0.9024908     |
| OAW28              | 0.7155319     | 0.6828103     | 0.6828103     | 0.6516708     | 0.6156497     | 0.6156497     | 0.6516708     | 0.6516708     | 0.6516708     | 0.7155319     | 0.7432961     |
| NCI-H460           | 0.7146986     | 0.4828994     | 0.4828994     | 0.4149362     | 0.3897879     | 0.3897879     | 0.4149362     | 0.4149362     | 0.3347929     | 0.3347929     | 0.4179333     |

| SNP_A-4199624 | SNP_A-2101390 | SNP_A-2253557 | ProbeSetID         | SNP_A-2096988 | SNP_A-2194428 | SNP_A-1990988 | SNP_A-4249755 | SNP_A-1930452 | SNP_A-2210006 | SNP_A-2034119 |
|---------------|---------------|---------------|--------------------|---------------|---------------|---------------|---------------|---------------|---------------|---------------|
| 11314429      | 6689767       | 9048083       | <b>Affy_SNP.ID</b> | 6625899       | 8104571       | 2625759       | 11152768      | 12275185      | 8339875       | 5678614       |
| rs2896191     | rs38852       | rs38857       | <b>dbSNP</b>       | rs10215153    | rs2237717     | rs2283053     | rs6978135     | rs41735       | rs41736       | rs6566        |
| 7             | 7             | 7             | <b>Chromosome</b>  | 7             | 7             | 7             | 7             | 7             | 7             | 7             |
| 115927995     | 115948476     | 115959364     | <b>Position</b>    | 115993082     | 115999338     | 116020970     | 116024313     | 116029367     | 116029719     | 116032369     |
| -             | -             | -             | <b>Strand</b>      | -             | -             | +             | -             | -             | +             | +             |
| q31.2         | q31.2         | q31.2         | <b>Cytoband</b>    | q31.2         |
| 6.483741      | 6.483741      | 6.353536      | Hs 746T            | 6.353536      | 6.285127      | 6.285127      | 5.589738      | 5.589738      | 5.589738      | 5.589738      |
| 6.572275      | 6.572275      | 6.043874      | MKN45              | 6.14231       | 6.14231       | 5.849256      | 5.652385      | 5.652385      | 6.14231       | 6.14231       |
| 5.821465      | 5.821465      | 5.821465      | EBC-1              | 5.821465      | 5.444932      | 5.179527      | 5.169925      | 5.179527      | 5.179527      | 5.179527      |
| 6.112681      | 6.112681      | 5.634547      | SNU-5              | 5.634547      | 5.634547      | 5.582103      | 5.480071      | 5.582103      | 5.480474      | 5.480474      |
| 5.644351      | 5.644351      | 5.472339      | NCI-H1573          | 5.737824      | 5.498854      | 5.498854      | 5.472339      | 5.498854      | 5.524749      | 5.498854      |
| 5.322405      | 5.322405      | 5.260284      | OE33               | 5.183072      | 4.85022       | 4.85022       | 4.83089       | 4.85022       | 4.85022       | 4.85022       |
| 4.833896      | 4.833896      | 4.833896      | OCUG-1             | 4.833896      | 4.487783      | 4.216219      | 4.216219      | 4.302471      | 4.302471      | 4.302471      |
| 4.665404      | 4.665404      | 4.665404      | VMRC-RCW           | 4.641322      | 4.641322      | 4.362491      | 4.313745      | 4.347246      | 4.347246      | 4.347246      |
| 4.078277      | 4.078277      | 4.078277      | SK-BR-3            | 4.078277      | 4.057138      | 3.782838      | 3.782838      | 4.057138      | 4.057138      | 4.154486      |
| 4.062967      | 4.033007      | 4.033007      | C32                | 4.062967      | 4.062967      | 3.910254      | 3.910254      | 4.062967      | 3.95434       | 3.95434       |
| 3.781298      | 3.781298      | 3.736275      | Detroit 562        | 3.781298      | 3.781298      | 3.781298      | 3.681808      | 3.781298      | 3.781298      | 3.590728      |
| 3.881318      | 3.881318      | 3.736046      | NCI-H2342          | 3.651417      | 3.430943      | 3.430943      | 3.430943      | 3.51867       | 3.51867       | 3.430943      |
| 3.614116      | 3.614116      | 3.614116      | FTC 133            | 3.534521      | 3.331986      | 3.331986      | 3.164621      | 3.164621      | 3.331986      | 3.331986      |
| 3.486409      | 3.486409      | 3.507132      | PNT1A              | 3.545874      | 3.507132      | 3.507132      | 3.497738      | 3.507132      | 3.507132      | 3.567584      |
| 3.44082       | 3.427928      | 3.427928      | KMRC-20            | 3.427928      | 3.427928      | 3.427928      | 3.363546      | 3.363546      | 3.363546      | 3.242777      |
| 3.570984      | 3.570984      | 3.570984      | COLO 858           | 3.560813      | 3.560813      | 3.368309      | 3.102875      | 3.102875      | 3.046291      | 3.002379      |
| 3.436175      | 3.436175      | 3.400879      | NUGC-4             | 3.514046      | 3.245861      | 3.245861      | 3.514046      | 3.514046      | 3.264536      | 3.264536      |
| 3.312846      | 3.312846      | 3.312846      | YKG-1              | 3.309577      | 3.198226      | 2.984106      | 2.984106      | 3.12276       | 3.12276       | 2.984106      |
| 3.296618      | 3.215802      | 3.215802      | H3255              | 3.215802      | 3.215802      | 3.047856      | 3.047856      | 3.215802      | 3.131906      | 3.131906      |
| 3.292095      | 3.259627      | 3.258172      | SK-CO-1            | 3.087823      | 2.752303      | 2.752303      | 2.752303      | 3.087823      | 3.087823      | 3.087823      |
| 3.292325      | 3.160291      | 3.169925      | LOU-NH91           | 3.169925      | 3.160291      | 3.072106      | 3.052138      | 3.052138      | 3.052138      | 3.052138      |
| 3.159654      | 3.159654      | 3.319119      | SK-MEL-3           | 3.409408      | 3.319119      | 3.127722      | 3.127722      | 3.140722      | 3.140722      | 3.140722      |
| 3.153093      | 3.153093      | 3.153093      | NCI-H2170          | 3.153093      | 3.153093      | 3.153093      | 2.957374      | 3.153093      | 2.946711      | 2.897823      |
| 3.352589      | 3.352589      | 3.25889       | G-361              | 3.006311      | 2.928197      | 2.928197      | 2.928197      | 2.97487       | 2.97487       | 2.928197      |
| 3.147903      | 3.147903      | 3.147903      | SK-NEP-1           | 3.116878      | 3.094811      | 2.939616      | 3.094811      | 3.094811      | 3.040945      | 3.040945      |
| 3.111966      | 3.111966      | 3.111966      | HCC-44             | 3.198578      | 3.111966      | 3.087111      | 3.087111      | 3.181942      | 3.087111      | 2.895793      |
| 3.082038      | 3.082038      | 3.013387      | WM 266-4           | 3.126037      | 2.940897      | 2.940897      | 2.940897      | 3.017466      | 3.375385      | 3.077652      |
| 3.199245      | 3.199245      | 3.199245      | NCI-H441           | 3.077623      | 3.008041      | 3.008041      | 3.008041      | 3.059222      | 3.059222      | 2.906888      |
| 3.262888      | 3.262888      | 3.074602      | P31/FUJ            | 2.9714        | 2.910215      | 2.9714        | 3.028255      | 3.074602      | 3.34875       | 3.441774      |
| 3.228383      | 3.228383      | 3.072613      | MOG-G-CCM          | 3.072613      | 2.633473      | 2.633473      | 2.633473      | 2.721684      | 2.721684      | 2.633473      |
| 3.069209      | 3.069209      | 3.069209      | SW 1417            | 3.069209      | 3.069209      | 2.932534      | 2.932534      | 3.072842      | 2.932534      | 2.921611      |
| 3.087635      | 3.087635      | 3.087635      | COLO 853           | 3.044162      | 3.033089      | 3.044162      | 3.044162      | 3.044162      | 3.033089      | 3.01853       |
| 3.016188      | 2.907836      | 2.907836      | NCI-H2085          | 3.016188      | 3.016188      | 3.016188      | 2.851037      | 3.039134      | 2.851037      | 2.829483      |

| ProbeSetID  | SNP_A-2135346 | SNP_A-4200418 | SNP_A-2166333 | SNP_A-1952822 | SNP_A-1896877 | SNP_A-4301043 | SNP_A-2050943 | SNP_A-4194333 | SNP_A-2259746 | SNP_A-4230238 | SNP_A-1989992 |
|-------------|---------------|---------------|---------------|---------------|---------------|---------------|---------------|---------------|---------------|---------------|---------------|
| Affy_SNP.ID | 7217859       | 11481086      | 7664895       | 12588794      | 11787387      | 9465412       | 5926612       | 10390310      | 9140266       | 7909743       | 2569009       |
| dbSNP       | rs17586344    | rs17586365    | rs17172432    | rs4140770     | rs6960438     | rs17172438    | rs10244108    | rs7785013     | rs759169      | rs3735061     | rs2877260     |
| Chromosome  | 7             | 7             | 7             | 7             | 7             | 7             | 7             | 7             | 7             | 7             | 7             |
| Position    | 54914607      | 54914995      | 54915526      | 54915685      | 54916117      | 54925746      | 54926546      | 54926876      | 54928845      | 54938076      | 54945838      |
| Strand      | -             | +             | +             | -             | +             | +             | +             | +             | -             | -             | +             |
| Cytoband    | p11.2         |
| 3.127195    | 2.909826      | 3.073827      | NCI-H23       | 3.073827      | 2.993191      | 2.569111      | 2.569111      | 2.993191      | 2.993191      | 2.993191      | 2.993191      |
| 3.037372    | 3.037372      | 3.037372      | A2058         | 2.905802      | 2.691156      | 2.691156      | 2.691156      | 2.746862      | 2.746862      | 2.691156      | 2.691156      |
| 2.979754    | 2.979754      | 2.979754      | LUDLU-1       | 2.979754      | 2.974304      | 2.974304      | 2.974304      | 2.954671      | 2.974304      | 2.954671      | 2.927444      |
| 2.903029    | 2.7736        | 2.903029      | COLO 741      | 2.963187      | 3.070583      | 3.070583      | 3.070583      | 3.070583      | 3.070583      | 3.070583      | 3.070583      |
| 3.117642    | 3.117642      | 3.081493      | KP-4          | 3.081493      | 2.774791      | 2.54315       | 2.774791      | 3.081493      | 2.815554      | 2.815554      | 2.815554      |
| 2.889578    | 2.829007      | 2.889578      | SR            | 2.946805      | 2.946805      | 2.946805      | 2.829007      | 2.946805      | 2.946805      | 2.946805      | 2.946805      |
| 3.129917    | 3.01169       | 2.814586      | WM-115        | 2.814586      | 2.774074      | 2.814586      | 2.814586      | 3.01169       | 3.01169       | 3.01169       | 3.01169       |
| 2.933108    | 2.933108      | 2.908847      | NCI-H810      | 2.908847      | 2.789785      | 2.706556      | 2.706556      | 2.706556      | 2.651222      | 2.651222      | 2.651222      |
| 3.115644    | 3.115644      | 3.115644      | SBC-5         | 2.764028      | 2.708363      | 2.708363      | 2.764028      | 2.816793      | 2.816793      | 2.816793      | 2.816793      |
| 2.91091     | 2.896216      | 2.896216      | MKN1          | 2.896216      | 2.871353      | 2.78681       | 2.78681       | 2.78681       | 2.78681       | 2.78681       | 2.78681       |
| 2.872665    | 2.872665      | 2.891581      | Sci-1         | 2.891581      | 2.882043      | 2.855191      | 2.758209      | 2.855191      | 2.855191      | 2.855191      | 2.855191      |
| 2.961833    | 2.868482      | 2.805641      | NCI-H1755     | 2.822516      | 2.805641      | 2.822516      | 2.822516      | 2.868482      | 2.995317      | 2.822516      | 2.822516      |
| 2.999513    | 2.793963      | 2.793963      | HCC202        | 2.867372      | 2.793963      | 2.665782      | 2.665782      | 2.867372      | 2.885484      | 3.031586      | 3.031586      |
| 3.018571    | 3.018571      | 3.018571      | LCLC-103H     | 3.018571      | 2.86148       | 2.86148       | 2.804244      | 2.853485      | 2.86148       | 2.86148       | 2.853485      |
| 2.942573    | 2.942573      | 2.942573      | KMRC-1        | 2.926669      | 2.747141      | 2.590564      | 2.558051      | 2.558051      | 2.550586      | 2.516773      | 2.516773      |
| 2.855502    | 2.736252      | 2.855502      | DMS 273       | 2.855502      | 2.736252      | 2.736252      | 2.736252      | 2.855502      | 2.905391      | 2.905391      | 2.905391      |
| 2.786547    | 2.639629      | 2.786547      | SNU-16        | 2.908583      | 2.908583      | 2.918055      | 2.918055      | 2.918055      | 2.918055      | 2.908583      | 2.908583      |
| 2.846898    | 2.83463       | 2.829202      | KATO III      | 2.83463       | 2.846898      | 2.846898      | 2.846898      | 2.846898      | 2.829202      | 2.829202      | 2.829202      |
| 3.002807    | 3.002807      | 3.002807      | COLO 857      | 2.887542      | 2.887542      | 2.887542      | 2.771425      | 2.771425      | 2.738464      | 2.709311      | 2.709311      |
| 2.743274    | 2.717423      | 2.892661      | 22RV1         | 2.892661      | 2.717423      | 2.892661      | 2.944539      | 2.94536       | 2.94536       | 2.944539      | 2.944539      |
| 3.028245    | 2.861513      | 2.808346      | JSC-1         | 2.808346      | 2.79267       | 2.79267       | 2.79267       | 2.800977      | 2.800977      | 2.79267       | 2.79267       |
| 2.937938    | 2.937938      | 2.889885      | U373 MG       | 2.737492      | 2.65281       | 2.700576      | 2.700576      | 2.700576      | 2.700576      | 2.346472      | 2.346472      |
| 2.789072    | 2.789072      | 2.794051      | U266B1        | 2.893698      | 2.893698      | 2.955883      | 2.955883      | 2.955883      | 2.932356      | 2.794051      | 2.794051      |
| 2.959889    | 2.959889      | 2.959889      | JHH-4         | 2.862679      | 2.793842      | 2.379383      | 2.379383      | 2.793842      | 2.379383      | 2.379383      | 2.379383      |
| 2.99227     | 2.839736      | 2.839736      | COLO 792      | 2.839736      | 2.784492      | 2.783019      | 2.783019      | 2.784492      | 2.783019      | 2.783019      | 2.783019      |
| 2.932001    | 2.932001      | 2.932001      | MRK-nu-1      | 2.826527      | 2.7575        | 2.448043      | 2.448043      | 2.786558      | 2.786558      | 2.780301      | 2.780301      |
| 2.864123    | 2.864123      | 2.739413      | CAL-148       | 2.739413      | 2.647051      | 2.483546      | 2.647051      | 2.799753      | 2.685838      | 2.799753      | 2.799753      |
| 2.766928    | 2.766928      | 2.767226      | COLO 684      | 2.813661      | 2.767226      | 2.766928      | 2.641824      | 2.689634      | 2.641824      | 2.617828      | 2.617828      |
| 2.621913    | 2.621913      | 2.856735      | PC-14         | 3.075477      | 2.856735      | 2.856735      | 2.848898      | 2.856735      | 2.848898      | 2.681785      | 2.681785      |
| 3.22942     | 3.111711      | 2.945755      | NCI-H841      | 2.571893      | 2.272146      | 2.272146      | 2.272146      | 2.571893      | 2.571893      | 2.272146      | 2.272146      |
| 2.766706    | 2.766706      | 2.750902      | BICR 78       | 2.750902      | 2.748488      | 2.688919      | 2.688919      | 2.717951      | 2.688919      | 2.717951      | 2.717951      |
| 2.849264    | 2.849264      | 2.750535      | RERF-LC-KJ    | 2.750535      | 2.750535      | 2.739737      | 2.612653      | 2.739737      | 2.739737      | 2.739737      | 2.739737      |
| 2.85965     | 2.85965       | 2.846317      | JHH-6         | 2.846317      | 2.651659      | 2.139404      | 2.139404      | 2.651659      | 2.506611      | 2.506611      | 2.506611      |
| 2.736453    | 2.736453      | 2.840145      | SW 48         | 3.015224      | 2.840145      | 2.840145      | 2.840145      | 2.840145      | 2.672475      | 2.672475      | 2.672475      |
| 2.741511    | 2.741511      | 2.741511      | NCI-H196      | 2.741511      | 2.591528      | 2.722144      | 2.722144      | 2.861063      | 2.722144      | 2.591528      | 2.591528      |
| 2.825368    | 2.825368      | 2.825368      | BALL-1        | 2.811048      | 2.514371      | 2.514371      | 2.514371      | 2.631642      | 2.631642      | 2.631642      | 2.631642      |
| 2.75277     | 2.75277       | 2.75277       | NCI-H889      | 2.718772      | 2.703924      | 2.703924      | 2.703924      | 2.718772      | 2.718772      | 2.718772      | 2.718772      |
| 2.718694    | 2.718694      | 2.718694      | NCI-H2009     | 2.718694      | 2.668633      | 2.581391      | 2.581391      | 2.668633      | 2.626527      | 2.63712       | 2.63712       |
| 2.687566    | 2.687566      | 2.687566      | SK-LU-1       | 2.698674      | 2.488958      | 2.478234      | 2.188013      | 2.478234      | 2.488958      | 2.488958      | 2.488958      |
| 2.755014    | 2.755014      | 2.751825      | HEC-1         | 2.524878      | 1.942708      | 1.942708      | 1.942708      | 2.524878      | 2.637131      | 2.448081      | 2.448081      |
| 2.679096    | 2.679096      | 2.859971      | H69AR         | 2.859971      | 2.679096      | 2.617945      | 2.431208      | 2.720785      | 2.559026      | 2.559026      | 2.559026      |
| 2.678275    | 2.678275      | 2.678275      | OCUM-1        | 2.666847      | 2.573762      | 2.326997      | 2.326997      | 2.700994      | 2.700994      | 2.609022      | 2.609022      |
| 2.187648    | 2.354955      | 2.645598      | KHOS-312H     | 2.645598      | 2.746383      | 2.746383      | 2.753492      | 2.776159      | 2.776159      | 2.881192      | 2.881192      |
| 2.644987    | 2.644987      | 2.644987      | IM-95         | 2.644987      | 2.571964      | 2.571964      | 2.571964      | 2.571964      | 2.707155      | 2.756968      | 2.756968      |
| 2.65734     | 2.642609      | 2.589694      | OAW42         | 2.642609      | 2.642609      | 2.508281      | 2.501596      | 2.508281      | 2.501596      | 2.501596      | 2.501596      |
| 2.733321    | 2.619959      | 2.624947      | MDST8         | 2.733321      | 2.709626      | 2.624947      | 2.545539      | 2.545539      | 2.386988      | 2.516869      | 2.516869      |
| 2.629857    | 2.515264      | 2.629857      | HT 115        | 2.629857      | 2.617211      | 2.452437      | 2.617211      | 2.670383      | 2.670383      | 2.617211      | 2.617211      |

| ProbeSetID  | SNP_A-2135346 | SNP_A-4200418 | SNP_A-2166333 | SNP_A-1952822 | SNP_A-1896877 | SNP_A-4301043 | SNP_A-2050943 | SNP_A-4194333 | SNP_A-2259746 | SNP_A-4230238 | SNP_A-1989992 |
|-------------|---------------|---------------|---------------|---------------|---------------|---------------|---------------|---------------|---------------|---------------|---------------|
| Affy_SNP.ID | 7217859       | 11481086      | 7664895       | 12588794      | 11787387      | 9465412       | 5926612       | 10390310      | 9140266       | 7909743       | 2569009       |
| dbSNP       | rs17586344    | rs17586365    | rs17172432    | rs4140770     | rs6960438     | rs17172438    | rs10244108    | rs7785013     | rs759169      | rs3735061     | rs2877260     |
| Chromosome  | 7             | 7             | 7             | 7             | 7             | 7             | 7             | 7             | 7             | 7             | 7             |
| Position    | 54914607      | 54914995      | 54915526      | 54915685      | 54916117      | 54925746      | 54926546      | 54926876      | 54928845      | 54938076      | 54945838      |
| Strand      | -             | +             | +             | -             | +             | +             | +             | +             | -             | -             | +             |
| Cytoband    | p11.2         |
| 3.137835    | 2.94173       | 2.778649      | HMCB          | 2.453646      | 2.422423      | 2.422423      | 2.422423      | 2.453646      | 2.453646      | 2.453646      |               |
| 2.609022    | 2.597317      | 2.609022      | RERF-LC-MS    | 2.62068       | 2.678275      | 2.678275      | 2.712288      | 2.712288      | 2.678275      | 2.678275      |               |
| 2.638114    | 2.624575      | 2.593608      | FTC 238       | 2.570319      | 2.422112      | 2.422112      | 2.422112      | 2.593608      | 2.624575      | 2.475972      |               |
| 2.410835    | 2.435119      | 2.593009      | KHOS-240S     | 2.593009      | 2.957861      | 3.179527      | 3.179527      | 3.184364      | 3.339124      | 3.339124      |               |
| 2.591834    | 2.591834      | 2.865267      | AN3CA         | 2.932983      | 2.865267      | 2.865267      | 2.591834      | 2.865267      | 2.591834      | 2.482899      |               |
| 2.71866     | 2.71866       | 2.640842      | NCI-H1651     | 2.510119      | 2.400318      | 2.400318      | 2.400318      | 2.510119      | 2.510119      | 2.400318      |               |
| 2.695751    | 2.578394      | 2.572272      | 1321N         | 2.572272      | 2.572272      | 2.322782      | 2.322782      | 2.343105      | 2.343105      | 2.343105      |               |
| 2.876831    | 2.876831      | 2.876831      | LU65          | 2.267022      | 2.266746      | 2.266746      | 2.266746      | 2.267022      | 2.267022      | 2.267022      |               |
| 2.632778    | 2.571444      | 2.571444      | HARA          | 2.571444      | 2.533441      | 2.249172      | 2.249172      | 2.533441      | 2.545205      | 2.571444      |               |
| 2.708126    | 2.708126      | 2.708126      | RCM-1         | 2.708126      | 2.642044      | 2.265877      | 2.642044      | 2.642044      | 2.49764       | 2.49764       |               |
| 2.566611    | 2.602918      | 2.602918      | HuH-7         | 2.439012      | 2.439012      | 2.439012      | 2.590917      | 2.602918      | 2.602918      | 2.590917      |               |
| 2.575063    | 2.566433      | 2.566433      | WIDR          | 2.566433      | 2.466782      | 2.466782      | 2.466782      | 2.498005      | 2.566433      | 2.498005      |               |
| 2.664408    | 2.587377      | 2.587377      | UMC-11        | 2.587377      | 2.564286      | 2.564286      | 2.564286      | 2.45749       | 2.469027      | 2.36983       |               |
| 2.662       | 2.662         | 2.662         | huH-1         | 2.58587       | 2.562447      | 2.374725      | 2.562447      | 2.58587       | 2.562447      | 2.562447      |               |
| 2.784206    | 2.784206      | 2.784206      | HCC-827       | 2.750924      | 2.561117      | 1.60523       | 1.60523       | 2.539515      | 1.963194      | 1.963194      |               |
| 2.670143    | 2.658167      | 2.512729      | NCI-H2081     | 2.512729      | 2.326315      | 2.326315      | 2.512729      | 2.765954      | 2.765954      | 2.765954      |               |
| 2.473646    | 2.469407      | 2.473646      | SW 13         | 2.614134      | 2.614134      | 2.621541      | 2.621541      | 2.739424      | 2.621541      | 2.614134      |               |
| 2.548738    | 2.548738      | 2.54327       | KYSE-140      | 2.54327       | 2.532626      | 2.54327       | 2.54327       | 2.617176      | 2.617176      | 2.54327       |               |
| 3.036526    | 3.036526      | 3.036526      | LC-1 sq       | 3.036526      | 2.514045      | 2.450858      | 2.514045      | 2.631735      | 2.514045      | 2.631735      |               |
| 2.457785    | 2.457785      | 2.457785      | KYSE-410      | 2.615545      | 2.615545      | 2.87114       | 2.87114       | 2.716669      | 2.615545      | 2.615545      |               |
| 2.650278    | 2.650278      | 2.650278      | CAL-85-1      | 2.245266      | 2.245266      | 2.245266      | 2.360449      | 2.412611      | 2.412611      | 2.412611      |               |
| 2.733478    | 2.733478      | 2.733478      | HCC-366       | 2.463418      | 1.915592      | 1.855399      | 1.855399      | 1.915592      | 1.915592      | 1.915592      |               |
| 2.527391    | 2.527391      | 2.527391      | SW 1463       | 2.532146      | 2.527391      | 2.45712       | 2.45712       | 2.527391      | 2.532146      | 2.532146      |               |
| 2.64501     | 2.64501       | 2.527259      | MOLT-4F       | 2.527259      | 2.178454      | 2.178454      | 2.221635      | 2.527259      | 2.412086      | 2.412086      |               |
| 2.52394     | 2.634851      | 2.634851      | SW-1710       | 2.52394       | 2.52394       | 2.25726       | 2.25726       | 2.451759      | 2.451759      | 2.451759      |               |
| 2.581108    | 2.581108      | 2.581108      | HCC-15        | 2.581108      | 2.54875       | 2.495503      | 2.478539      | 2.478539      | 2.430264      | 2.277563      |               |
| 2.505933    | 2.505933      | 2.504589      | PLC/PRF/5     | 2.504589      | 2.504589      | 2.49792       | 2.49792       | 2.49792       | 2.464769      | 2.373293      |               |
| 2.639201    | 2.495648      | 2.495648      | A375.S2       | 2.650462      | 2.650462      | 2.46693       | 2.446932      | 2.46693       | 2.446932      | 2.446932      |               |
| 2.490127    | 2.490127      | 2.488386      | COR-L279      | 2.488386      | 2.320989      | 1.827506      | 1.827506      | 2.320989      | 2.320989      | 2.320989      |               |
| 2.869369    | 2.486619      | 2.37347       | COLO 685      | 2.486619      | 2.486619      | 2.486619      | 2.486619      | 2.486619      | 2.486619      | 2.146914      |               |
| 2.526838    | 2.518738      | 2.482021      | FLYA13        | 2.296163      | 2.252082      | 2.252082      | 2.348966      | 2.482021      | 2.482021      | 2.348966      |               |
| 2.622157    | 2.476583      | 2.451031      | JHH-7         | 2.476583      | 2.409296      | 2.409296      | 2.476583      | 2.476583      | 2.409296      | 2.409296      |               |
| 2.348774    | 2.348774      | 2.503996      | NCI-H1623     | 2.504189      | 2.504189      | 2.504189      | 2.469236      | 2.504189      | 2.469236      | 2.469236      |               |
| 2.512451    | 2.468389      | 2.468389      | HGC-27        | 2.512451      | 2.468389      | 2.406866      | 2.406866      | 2.464351      | 2.406866      | 2.208042      |               |
| 2.541058    | 2.541058      | 2.541058      | NCI-H2347     | 2.56923       | 2.541058      | 2.541058      | 2.393743      | 2.393743      | 2.34912       | 2.222837      |               |
| 2.675114    | 2.675114      | 2.477048      | SKN           | 2.412036      | 2.377207      | 2.000058      | 2.000058      | 2.377207      | 2.027425      | 2.027425      |               |
| 2.658569    | 2.658569      | 2.658569      | VMRC-LCP      | 2.563919      | 2.339581      | 2.14218       | 2.14218       | 2.14218       | 1.760995      | 1.760995      |               |
| 2.474014    | 2.580896      | 2.580896      | SAT           | 2.474014      | 2.446993      | 2.439669      | 2.439669      | 2.439669      | 2.217196      | 2.217196      |               |
| 2.86641     | 2.86641       | 2.484937      | CaR-1         | 2.393478      | 2.221515      | 2.218641      | 2.218641      | 2.393478      | 2.484937      | 2.659384      |               |
| 2.438046    | 2.437376      | 2.437376      | SW 900        | 2.438046      | 2.438046      | 2.437376      | 2.365804      | 2.437376      | 2.365804      | 2.365804      |               |
| 2.529889    | 2.43466       | 2.43466       | Nthy-ori 3-1  | 2.43466       | 2.227121      | 2.227121      | 2.227121      | 2.43466       | 2.43466       | 2.227121      |               |
| 2.489129    | 2.434635      | 2.620669      | NCI-H526      | 2.620669      | 2.323711      | 2.323711      | 2.323711      | 2.424093      | 2.406954      | 2.424093      |               |
| 2.586082    | 2.586082      | 2.586082      | HUP-T3        | 2.586082      | 2.434586      | 2.434586      | 2.434586      | 2.434586      | 2.313453      | 2.313453      |               |
| 2.430152    | 2.430152      | 2.430152      | BT-483        | 2.475776      | 2.475776      | 2.475776      | 2.475776      | 2.578736      | 2.475776      | 2.430152      |               |
| 2.454977    | 2.454977      | 2.429767      | NCI-H2330     | 2.429767      | 2.358067      | 2.155375      | 2.155375      | 2.319052      | 2.112862      | 2.112862      |               |
| 2.439372    | 2.300963      | 2.300963      | NCI-H711      | 2.300963      | 2.300963      | 2.576658      | 2.683493      | 2.781566      | 2.781566      | 2.781566      |               |
| 2.423557    | 2.423557      | 2.518015      | NCI-H661      | 2.576386      | 2.518015      | 2.518015      | 2.456147      | 2.456147      | 2.281937      | 2.281937      |               |

| ProbeSetID  | SNP_A-2135346 | SNP_A-4200418 | SNP_A-2166333 | SNP_A-1952822 | SNP_A-1896871 | SNP_A-4301043 | SNP_A-2050943 | SNP_A-4194333 | SNP_A-2259746 | SNP_A-4230238 | SNP_A-1989992 |
|-------------|---------------|---------------|---------------|---------------|---------------|---------------|---------------|---------------|---------------|---------------|---------------|
| Affy_SNP.ID | 7217859       | 11481086      | 7664895       | 12588794      | 11787387      | 9465412       | 5926612       | 10390310      | 9140266       | 7909743       | 2569009       |
| dbSNP       | rs17586344    | rs17586365    | rs17172432    | rs4140770     | rs6960438     | rs17172438    | rs10244108    | rs7785013     | rs759169      | rs3735061     | rs2877260     |
| Chromosome  | 7             | 7             | 7             | 7             | 7             | 7             | 7             | 7             | 7             | 7             | 7             |
| Position    | 54914607      | 54914995      | 54915526      | 54915685      | 54916117      | 54925746      | 54926546      | 54926876      | 54928845      | 54938076      | 54945838      |
| Strand      | -             | +             | +             | -             | +             | +             | +             | +             | -             | -             | +             |
| Cytoband    | p11.2         |
| 2.456726    | 2.435504      | 2.422922      | EJ138         | 2.422922      | 2.390053      | 2.368091      | 2.368091      | 2.390053      | 2.368091      | 2.368091      |               |
| 2.188472    | 2.188472      | 2.419543      | HOS           | 2.419543      | 2.695388      | 2.855395      | 2.970915      | 2.970915      | 2.970915      | 2.970915      |               |
| 2.470192    | 2.416223      | 2.30399       | KHM-3S        | 2.470192      | 2.470192      | 2.470192      | 2.30399       | 2.30399       | 2.30399       | 2.30399       |               |
| 2.459705    | 2.437996      | 2.382607      | ChaGo-K-1     | 2.437996      | 2.382607      | 2.209626      | 2.209626      | 2.209626      | 2.209626      | 2.209626      |               |
| 2.479114    | 2.479114      | 2.446536      | H69V          | 2.446536      | 2.404434      | 2.404434      | 1.781485      | 2.101909      | 1.8302        | 1.8302        |               |
| 2.401059    | 2.297361      | 2.297361      | Hs 936.T      | 2.401059      | 2.297361      | 2.401059      | 2.401059      | 2.694175      | 2.732404      | 2.619671      |               |
| 2.338016    | 2.338016      | 2.386913      | 201T          | 2.477415      | 2.477415      | 1.996738      | 2.477415      | 2.477415      | 2.477415      | 2.477415      |               |
| 2.386862    | 2.386862      | 2.386862      | SUIT-2        | 2.386862      | 2.386862      | 2.355695      | 2.386862      | 2.386862      | 2.355695      | 2.355695      |               |
| 2.647674    | 2.545754      | 2.461193      | NCI-H1792     | 2.30621       | 2.161575      | 2.161575      | 2.161575      | 2.161575      | 2.119541      | 2.109197      |               |
| 2.438851    | 2.422959      | 2.366694      | NCI-H460      | 2.355529      | 2.355529      | 2.355529      | 2.355529      | 2.366694      | 2.366694      | 2.295017      |               |
| 2.403506    | 2.403506      | 2.403506      | SNU-398       | 2.342234      | 2.17388       | 2.17388       | 2.17388       | 2.342234      | 2.17388       | 2.131806      |               |
| 2.39475     | 2.336154      | 2.39475       | COR-L95       | 2.461255      | 2.39475       | 2.29572       | 2.202749      | 2.29572       | 2.202749      | 2.202749      |               |
| 2.400745    | 2.373267      | 2.373267      | SK-MES        | 2.373267      | 2.036371      | 2.036371      | 2.036371      | 2.087081      | 2.087081      | 2.087081      |               |
| 2.742192    | 2.742192      | 2.742192      | BFTC-905      | 2.363592      | 2.363592      | 2.363592      | 2.206297      | 2.206297      | 2.194952      | 2.194952      |               |
| 2.392408    | 2.392408      | 2.392408      | EB1           | 2.392408      | 2.392408      | 2.378966      | 2.302315      | 2.378966      | 2.302315      | 2.191039      |               |
| 2.403029    | 2.403029      | 2.389221      | CASKI         | 2.320756      | 2.320756      | 2.153843      | 2.153843      | 2.153843      | 2.286277      | 2.286277      |               |
| 2.57071     | 2.57071       | 2.539694      | HO-1-N-1      | 2.309529      | 2.1506        | 1.673448      | 1.673448      | 2.309529      | 2.063595      | 2.063595      |               |
| 2.352646    | 2.352646      | 2.352646      | PC-3 [JPC-3]  | 2.352646      | 2.390695      | 2.261862      | 2.261862      | 2.573762      | 2.585563      | 2.585563      |               |
| 2.419905    | 2.419905      | 2.416011      | TE7           | 2.286395      | 2.239031      | 2.193293      | 2.193293      | 2.239031      | 2.286395      | 2.286395      |               |
| 2.799228    | 2.799228      | 2.567073      | TASK1         | 2.241673      | 1.951701      | 1.826909      | 1.826909      | 1.951701      | 1.951701      | 1.951701      |               |
| 2.479578    | 2.479578      | 2.479578      | NCI-H1734     | 2.393428      | 2.143841      | 2.300417      | 2.300417      | 2.393428      | 2.300417      | 2.265733      |               |
| 2.473757    | 2.37366       | 2.37366       | HRT-18        | 2.309387      | 2.23229       | 2.118309      | 2.118309      | 2.23229       | 2.225467      | 2.118309      |               |
| 2.541225    | 2.541225      | 2.541225      | RT112/84      | 2.335088      | 2.098983      | 2.098983      | 2.098983      | 2.230693      | 2.230693      | 2.098983      |               |
| 2.480592    | 2.480592      | 2.390431      | CAL-29        | 2.341401      | 2.335422      | 2.335422      | 2.335422      | 2.335422      | 2.269625      | 2.269625      |               |
| 2.373584    | 2.373584      | 2.399477      | IMR-90        | 2.302523      | 2.260069      | 2.157711      | 1.856976      | 1.856976      | 1.760415      | 1.856976      |               |
| 2.497155    | 2.484534      | 2.484534      | RO82-W-1      | 2.191309      | 2.146269      | 2.146269      | 2.146269      | 2.191309      | 2.191309      | 2.191309      |               |
| 2.335088    | 2.283833      | 2.279725      | NCI-H1581     | 2.279725      | 2.279725      | 2.066078      | 2.066078      | 2.477684      | 2.507991      | 2.477684      |               |
| 2.399816    | 2.381394      | 2.364635      | RT4           | 2.304873      | 1.956054      | 1.956054      | 1.956054      | 2.15532       | 2.15532       | 1.965911      |               |
| 2.7243      | 2.426732      | 2.339324      | HT 29         | 2.295825      | 2.152886      | 2.152886      | 2.152886      | 2.152886      | 2.23842       | 2.295825      |               |
| 2.611287    | 2.611287      | 2.611287      | KON           | 2.302289      | 2.09763       | 1.986494      | 1.986494      | 2.09763       | 1.986494      | 1.986494      |               |
| 2.415786    | 2.415786      | 2.415786      | BT-20         | 2.248656      | 2.195222      | 2.113167      | 2.113167      | 2.113167      | 2.113167      | 2.113167      |               |
| 2.355759    | 2.355759      | 2.355759      | BU25 TK       | 2.355759      | 2.313143      | 2.313143      | 2.277943      | 2.277943      | 2.263337      | 2.128745      |               |
| 2.637258    | 2.542278      | 2.295004      | RPMI-7951     | 2.295004      | 2.09083       | 2.09083       | 2.09083       | 2.09083       | 2.09083       | 2.09083       |               |
| 2.276764    | 2.276764      | 2.327603      | IHH-4         | 2.327603      | 2.327603      | 2.276764      | 2.276764      | 2.276764      | 2.24158       | 2.24158       |               |
| 2.440648    | 2.361976      | 2.267548      | fr2           | 2.239668      | 1.576837      | 1.576837      | 1.576837      | 2.267548      | 2.267548      | 1.576837      |               |
| 2.314152    | 2.309387      | 2.309387      | CAL-51        | 2.250694      | 1.973332      | 1.973332      | 2.063863      | 2.167407      | 2.167407      | 2.167407      |               |
| 2.26032     | 2.26032       | 2.26032       | COR-L 105     | 2.410134      | 2.26032       | 2.26032       | 2.26032       | 2.26032       | 2.1852        | 2.1852        |               |
| 2.461587    | 2.461587      | 2.461587      | LK-2          | 2.278048      | 2.230466      | 2.230466      | 2.241075      | 2.27979       | 2.27979       | 2.241075      |               |
| 2.55616     | 2.51822       | 2.51822       | FU97          | 2.372266      | 2.336617      | 2.089362      | 2.089362      | 2.089362      | 2.088718      | 2.088718      |               |
| 2.430984    | 2.354164      | 2.253695      | MOG-G-UVW     | 2.253695      | 1.719542      | 1.719542      | 1.719542      | 2.237424      | 2.237424      | 2.236759      |               |
| 2.243583    | 2.243583      | 2.391124      | NCI-H2452     | 2.445053      | 2.500262      | 2.500262      | 2.445053      | 2.445053      | 2.049278      | 1.92649       |               |
| 2.591564    | 2.591564      | 2.343144      | HuCC1         | 2.226467      | 2.209264      | 2.169938      | 2.169938      | 2.169938      | 2.03966       | 2.03966       |               |
| 2.234991    | 2.068643      | 2.068643      | NCI-H1417     | 2.234991      | 2.234991      | 2.234991      | 2.234991      | 2.234991      | 2.56006       | 2.56006       |               |
| 2.239337    | 2.231598      | 2.231598      | Hs 633T       | 2.231598      | 2.158667      | 2.017992      | 2.017992      | 2.158667      | 2.017992      | 1.948383      |               |
| 2.191309    | 2.340812      | 2.340812      | A-375         | 2.326753      | 2.326753      | 2.260438      | 2.258843      | 2.258843      | 2.081799      | 2.081799      |               |
| 2.513949    | 2.220072      | 2.217624      | NCI-H1650     | 2.217624      | 2.128524      | 1.990926      | 1.990926      | 2.128524      | 1.990926      | 1.990926      |               |
| 2.502893    | 2.502893      | 2.319491      | KP-1N         | 2.130483      | 2.055978      | 1.82323       | 2.055978      | 2.130483      | 2.055978      | 2.130483      |               |

| ProbeSetID  | SNP_A-2135346 | SNP_A-4200418 | SNP_A-2166333 | SNP_A-1952822 | SNP_A-1896871 | SNP_A-4301043 | SNP_A-2050943 | SNP_A-4194333 | SNP_A-2259746 | SNP_A-4230238 | SNP_A-1989992 |
|-------------|---------------|---------------|---------------|---------------|---------------|---------------|---------------|---------------|---------------|---------------|---------------|
| Affy_SNP.ID | 7217859       | 11481086      | 7664895       | 12588794      | 11787387      | 9465412       | 5926612       | 10390310      | 9140266       | 7909743       | 2569009       |
| dbSNP       | rs17586344    | rs17586365    | rs17172432    | rs4140770     | rs6960438     | rs17172438    | rs10244108    | rs7785013     | rs759169      | rs3735061     | rs2877260     |
| Chromosome  | 7             | 7             | 7             | 7             | 7             | 7             | 7             | 7             | 7             | 7             | 7             |
| Position    | 54914607      | 54914995      | 54915526      | 54915685      | 54916117      | 54925746      | 54926546      | 54926876      | 54928845      | 54938076      | 54945838      |
| Strand      | -             | +             | +             | -             | +             | +             | +             | +             | -             | -             | +             |
| Cytoband    | p11.2         |
| 2.237716    | 2.237716      | 2.237716      | NCI-H2135     | 2.237716      | 2.237716      | 2.236068      | 2.187364      | 2.236068      | 2.187364      | 1.998441      |               |
| 2.174545    | 2.174545      | 2.486193      | HT55          | 2.502493      | 2.155019      | 2.079245      | 2.079245      | 2.079245      | 2.047362      | 2.246087      |               |
| 2.553077    | 2.553077      | 2.411936      | NCI-H1781     | 2.411936      | 2.086045      | 2.086045      | 2.086045      | 2.086045      | 1.905025      | 1.905025      |               |
| 2.419768    | 2.311719      | 2.311719      | RERF-GC-1B    | 2.093401      | 1.883415      | 1.883415      | 1.883415      | 2.049845      | 2.049845      | 2.049845      |               |
| 2.198523    | 2.192591      | 2.198523      | NCI-H727      | 2.198712      | 2.198712      | 2.198712      | 2.198712      | 2.198712      | 2.198523      | 2.157452      |               |
| 2.306923    | 2.306923      | 2.306923      | 647-V         | 2.177857      | 1.81158       | 1.81158       | 1.81158       | 2.085373      | 2.085373      | 1.923765      |               |
| 2.248418    | 2.230426      | 2.230426      | NCI-H2023     | 2.160019      | 1.9641        | 1.9641        | 1.9641        | 2.160019      | 2.160019      | 1.9641        |               |
| 2.207438    | 2.123884      | 2.207438      | Calu-3        | 2.230186      | 2.230186      | 2.230186      | 2.230186      | 2.230186      | 2.182777      | 2.107085      |               |
| 2.512403    | 2.512403      | 2.512403      | H69           | 2.262125      | 2.170523      | 2.170523      | 2.076324      | 2.093164      | 2.093164      | 2.156386      |               |
| 2.514432    | 2.514432      | 2.514432      | VMRC-LCD      | 2.21204       | 2.123138      | 2.062565      | 2.123138      | 2.123138      | 2.123138      | 2.064724      |               |
| 2.248656    | 2.113167      | 2.113167      | VMRC-LCD      | 2.390695      | 2.113167      | 2             | 2.113167      | 2.248656      | 2.248656      | 2.248656      |               |
| 2.311291    | 2.311136      | 2.285088      | T84           | 1.759537      | 1.717028      | 1.717028      | 1.759537      | 2.170224      | 2.170224      | 2.170224      |               |
| 2.302925    | 2.302925      | 2.18781       | SW 1116       | 2.175211      | 2.12246       | 2.12246       | 2.116079      | 2.116079      | 2.116079      | 1.78108       |               |
| 2.182411    | 2.182411      | 2.210069      | A373 C6       | 2.214331      | 2.214331      | 2.210069      | 2.179281      | 2.179281      | 2.179281      | 2.210069      |               |
| 2.177844    | 2.177844      | 2.177844      | COLO 201      | 2.177844      | 2.281492      | 2.281492      | 2.177844      | 2.281492      | 2.177844      | 2.104136      |               |
| 1.99123     | 2.171203      | 2.177559      | KHOS/NP       | 2.177559      | 2.211892      | 2.211892      | 2.307416      | 2.479505      | 2.479505      | 2.499012      |               |
| 2.171189    | 2.163893      | 2.112903      | Hs 891.T      | 2.138813      | 2.138813      | 2.171189      | 2.15808       | 2.218734      | 2.210605      | 2.15808       |               |
| 2.194493    | 2.194493      | 2.194493      | PA-TU-8988T   | 2.112945      | 1.987015      | 1.638094      | 1.638094      | 1.987015      | 1.638094      | 1.638094      |               |
| 2.311874    | 2.311874      | 2.261598      | BICR22        | 2.23406       | 2.159459      | 2.140339      | 2.042277      | 2.042277      | 2.042277      | 2.140339      |               |
| 2.15123     | 2.149901      | 2.15123       | MES-SA/Dx-5   | 2.15123       | 2.15123       | 1.759835      | 1.759835      | 1.794775      | 2.092982      | 2.092982      |               |
| 2.076015    | 2.024394      | 2.024394      | SK-MEL-1      | 2.222143      | 2.222143      | 1.81615       | 1.81615       | 2.222143      | 2.238101      | 2.238101      |               |
| 2.343336    | 2.343336      | 2.14347       | KYSE-70       | 2.112057      | 2.112057      | 2.112057      | 2.112057      | 2.139459      | 2.139459      | 2.112057      |               |
| 2.342439    | 2.189702      | 2.141122      | A673          | 2.035502      | 1.851133      | 1.851133      | 1.851133      | 2.035502      | 2.141122      | 2.05207       |               |
| 2.277328    | 2.277328      | 2.338067      | D1.1          | 2.382355      | 2.382355      | 2.338067      | 1.831608      | 1.831608      | 1.831608      | 1.927425      |               |
| 2.230693    | 2.230693      | 2.230693      | NCI-H1793     | 2.321453      | 2.230693      | 2.230693      | 2.099568      | 2.099568      | 2.062762      | 1.825376      |               |
| 2.17176     | 2.17176       | 2.17176       | OE19          | 2.130235      | 1.972108      | 1.972108      | 1.972108      | 1.963632      | 1.960241      | 1.960241      |               |
| 2.154349    | 2.129159      | 2.125128      | WILCL         | 2.125128      | 1.728194      | 1.728194      | 1.728194      | 2.129159      | 2.129159      | 1.805243      |               |
| 2.043357    | 2.043357      | 2.127448      | HCC-78        | 2.127448      | 2.043357      | 2.127448      | 2.145735      | 2.145735      | 2.145735      | 2.127448      |               |
| 2.326997    | 2.23539       | 2.181707      | BEN           | 2.071248      | 2.057138      | 1.743687      | 1.743687      | 2.071248      | 2.071248      | 2.071248      |               |
| 2.229107    | 2.1217        | 2.229107      | Calu-1        | 2.278913      | 1.993833      | 1.967268      | 1.967268      | 1.993833      | 1.967268      | 1.967268      |               |
| 2.140147    | 2.092381      | 2.092381      | SK-N-BE(2)    | 2.121547      | 2.121547      | 2.121547      | 2.121547      | 2.140147      | 2.121547      | 2.121547      |               |
| 2.578028    | 2.578028      | 2.577367      | HUP-T4        | 2.013415      | 1.861323      | 1.801104      | 1.801104      | 1.861323      | 1.861323      | 1.861323      |               |
| 2.390695    | 2.113167      | 2.014391      | MCF7          | 1.806077      | 1.647499      | 1.647499      | 1.647499      | 1.806077      | 2.127006      | 2.573762      |               |
| 2.107752    | 2.072641      | 2.180284      | Ishikawa      | 2.228787      | 2.180284      | 2.083509      | 2.083509      | 2.136805      | 2.083509      | 2.070417      |               |
| 2.27279     | 2.27279       | 2.27279       | Hs 195.T      | 2.21409       | 2.102368      | 2.036898      | 1.676532      | 1.676532      | 1.625029      | 1.676532      |               |
| 2.369068    | 2.09322       | 2.161411      | HT 1376       | 2.263851      | 2.161411      | 2.09322       | 2.050596      | 2.050596      | 2.042092      | 1.959509      |               |
| 2.106695    | 2.091641      | 2.106695      | COLO 205      | 2.163156      | 2.163156      | 2.106695      | 2.091641      | 2.091641      | 1.982447      | 1.816427      |               |
| 2.354037    | 2.16953       | 2.140655      | NCI-H1437     | 2.140655      | 1.811256      | 1.811256      | 1.811256      | 1.965049      | 1.876075      | 1.876075      |               |
| 2.086899    | 2.086899      | 2.086899      | A2780         | 2.182587      | 2.192213      | 2.192213      | 2.032536      | 2.192213      | 2.032536      | 2.032536      |               |
| 2.296202    | 2.086801      | 2.086801      | A549          | 2.086801      | 2.029196      | 2.008413      | 2.008413      | 2.008413      | 2.003129      | 1.857233      |               |
| 1.970986    | 1.954516      | 1.970986      | NCI-H1522     | 2.233994      | 2.233994      | 2.233994      | 2.233994      | 2.233994      | 2.191673      | 2.191673      |               |
| 2.152311    | 2.1186        | 2.1186        | G-401         | 2.043798      | 2.043798      | 1.976228      | 2.043798      | 2.043798      | 1.976228      | 1.976228      |               |
| 2.081757    | 2.081757      | 2.081757      | PC-9          | 2.081757      | 2.081056      | 2.038151      | 2.038151      | 2.038151      | 1.97694       | 1.856839      |               |
| 2.225467    | 2.225467      | 2.225467      | GRANTA-519    | 2.203542      | 2.080312      | 1.923898      | 1.923898      | 1.923898      | 1.923898      | 1.923898      |               |
| 2.302016    | 2.115483      | 2.115483      | 639-V         | 2.03956       | 1.794186      | 1.794186      | 1.794186      | 2.03956       | 2.03956       | 1.794186      |               |
| 2.056813    | 2.041125      | 2.056813      | A2780 ADR     | 2.158422      | 2.244418      | 2.056813      | 2.056813      | 2.087389      | 2.056813      | 2.016386      |               |
| 2.164329    | 2.142358      | 2.122972      | A-427         | 2.020743      | 1.917789      | 1.609611      | 1.609611      | 1.917789      | 1.892369      | 1.892369      |               |

| ProbeSetID  | SNP_A-2135346 | SNP_A-4200418 | SNP_A-2166333    | SNP_A-1952822 | SNP_A-1896877 | SNP_A-4301043 | SNP_A-2050943 | SNP_A-4194333 | SNP_A-2259746 | SNP_A-4230238 | SNP_A-1989992 |
|-------------|---------------|---------------|------------------|---------------|---------------|---------------|---------------|---------------|---------------|---------------|---------------|
| Affy_SNP.ID | 7217859       | 11481086      | 7664895          | 12588794      | 11787387      | 9465412       | 5926612       | 10390310      | 9140266       | 7909743       | 2569009       |
| dbSNP       | rs17586344    | rs17586365    | rs17172432       | rs4140770     | rs6960438     | rs17172438    | rs10244108    | rs7785013     | rs759169      | rs3735061     | rs2877260     |
| Chromosome  | 7             | 7             | 7                | 7             | 7             | 7             | 7             | 7             | 7             | 7             | 7             |
| Position    | 54914607      | 54914995      | 54915526         | 54915685      | 54916117      | 54925746      | 54926546      | 54926876      | 54928845      | 54938076      | 54945838      |
| Strand      | -             | +             | +                | -             | +             | +             | +             | +             | -             | -             | +             |
| Cytoband    | p11.2         | p11.2         | p11.2            | p11.2         | p11.2         | p11.2         | p11.2         | p11.2         | p11.2         | p11.2         | p11.2         |
| 2.068502    | 2.068502      | 2.381306      | NB69             | 2.381306      | 2.437872      | 2.068502      | 2.02282       | 2.068502      | 2.068502      | 2.146914      |               |
| 2.234366    | 2.234366      | 2.175917      | NCI-H2286        | 1.95888       | 1.905502      | 1.905502      | 1.905502      | 1.95888       | 1.95888       | 1.95888       |               |
| 2.06674     | 2.064498      | 2.064498      | SBC-2            | 2.064498      | 2.064498      | 1.9822        | 1.9822        | 1.9822        | 1.9822        | 1.9822        |               |
| 2.172807    | 2.063637      | 2.063637      | HCT-8            | 2.063637      | 1.885292      | 1.885292      | 2.172807      | 2.207868      | 2.172807      | 2.058043      |               |
| 2.063143    | 2.063143      | 2.083243      | Hs 895.T         | 2.108752      | 2.083243      | 2.083243      | 2.07874       | 2.07874       | 2.063143      | 2.041367      |               |
| 2.272777    | 2.194332      | 2.140998      | K562/ADM         | 1.979005      | 1.537089      | 1.537089      | 1.919347      | 1.979005      | 1.979005      | 1.979005      |               |
| 2.145968    | 2.145968      | 2.107627      | Hs 228.T         | 2.011059      | 1.828333      | 1.70395       | 1.70395       | 1.828333      | 1.828333      | 1.876511      |               |
| 2.145542    | 2.142221      | 2.142221      | STC 1            | 2.142221      | 2.057322      | 1.97614       | 1.97614       | 2.057322      | 2.057322      | 2.011073      |               |
| 2.043286    | 2.043286      | 2.052311      | LNcaP clone Fc   | 2.05309       | 2.052311      | 2.052311      | 2.052311      | 2.052311      | 2.077799      | 2.102828      |               |
| 2.034276    | 1.905055      | 2.034276      | C8166            | 2.078207      | 2.034276      | 2.034276      | 2.034276      | 2.078207      | 2.047845      | 2.047845      |               |
| 2.406001    | 2.383176      | 2.383176      | DMS 92           | 2.383176      | 2.046383      | 2.040258      | 2.040258      | 2.040258      | 1.519079      | 2.046383      |               |
| 2.264772    | 2.115746      | 2.115746      | NCI-H2196        | 1.95349       | 1.95349       | 1.799125      | 1.95349       | 1.974089      | 1.974089      | 1.974089      |               |
| 2.044125    | 2.00124       | 1.94612       | HMVII            | 2.044125      | 2.044125      | 2.044125      | 2.044125      | 2.100962      | 2.268862      | 2.100962      |               |
| 1.942649    | 1.868942      | 2.038564      | Hs 417.Lu        | 2.242813      | 2.076577      | 2.076577      | 2.038564      | 2.076577      | 2.038564      | 1.722212      |               |
| 2.231465    | 2.231465      | 2.155183      | H-EMC-SS         | 1.916319      | 1.676112      | 1.676112      | 1.676112      | 1.685475      | 1.676112      | 1.685475      |               |
| 2.227908    | 2.018809      | 2.254184      | H33HJ-JA1        | 2.285219      | 2.254184      | 2.254184      | 1.934145      | 1.94615       | 1.934145      | 1.94615       |               |
| 2.032336    | 2.023578      | 2.023578      | HCT 116          | 2.032336      | 2.023578      | 2.032336      | 2.032336      | 2.023578      | 1.877294      | 1.877294      |               |
| 2.140573    | 2.135732      | 2.135732      | GA-10            | 2.135732      | 2.032023      | 2.007233      | 2.007233      | 2.032023      | 2.007233      | 1.812904      |               |
| 2.181707    | 2.140779      | 2.140779      | NCI-H1666        | 2.028711      | 1.598175      | 1.427392      | 1.427392      | 1.427392      | 1.427392      | 1.301529      |               |
| 2.065105    | 2.003042      | 2.065105      | LS174T           | 2.013013      | 2.003042      | 2.003042      | 2.003042      | 2.013013      | 2.020013      | 2.069516      |               |
| 2.023521    | 2.017562      | 2.017562      | Hs 908.T         | 2.017562      | 2.017562      | 2.072247      | 2.072247      | 2.072247      | 2.103858      | 2.017562      |               |
| 2.117326    | 2.070234      | 1.971351      | C170             | 1.906247      | 1.862806      | 1.862806      | 1.906247      | 1.907112      | 1.907112      | 2.117326      |               |
| 2.10472     | 2.10472       | 2.082977      | J82              | 1.952889      | 1.808868      | 1.500407      | 1.500407      | 1.808868      | 1.500407      | 1.500407      |               |
| 2.013759    | 1.876647      | 2.013759      | A2780cis         | 2.125305      | 2.013759      | 1.876647      | 1.876647      | 2.013759      | 2.013759      | 2.013759      |               |
| 2.09915     | 2.027082      | 2.013329      | OUS-11           | 2.013329      | 1.583595      | 1.583595      | 1.915814      | 1.915814      | 1.915814      | 1.915814      |               |
| 2.013228    | 2.013228      | 2.013228      | KYSE-150         | 2.110086      | 2.110086      | 2.110086      | 2.110086      | 2.110086      | 1.786119      | 1.652157      |               |
| 1.883024    | 2.049689      | 2.049689      | COR-L23          | 2.049689      | 1.883024      | 1.883024      | 1.883024      | 2.022061      | 2.021216      | 1.883024      |               |
| 2.138772    | 2.138772      | 2.091878      | MS-1-L           | 1.94925       | 1.856506      | 1.782729      | 1.782729      | 1.94925       | 1.94925       | 1.94925       |               |
| 2.46888     | 2.46888       | 2.46888       | SKG-IIIb         | 2.020314      | 1.712362      | 1.675983      | 1.712362      | 1.924298      | 1.924298      | 1.924298      |               |
| 2.199681    | 2.096347      | 2.096347      | P32/ISH          | 1.990462      | 1.990462      | 1.948001      | 1.990462      | 1.990462      | 1.941339      | 1.990462      |               |
| 2.146187    | 1.98732       | 1.98732       | NCI-H1693 (shij) | 1.98732       | 1.983434      | 1.98732       | 1.98761       | 1.98761       | 1.98761       | 1.98761       |               |
| 2.010671    | 2.010671      | 1.987479      | Hs 781.T         | 2.010671      | 1.987479      | 1.936521      | 1.936521      | 1.987479      | 1.987479      | 1.906113      |               |
| 2.36405     | 2.36405       | 2.107001      | Hs 600.T         | 1.866481      | 1.736046      | 1.315481      | 1.315481      | 1.736046      | 1.736046      | 1.736046      |               |
| 2.077617    | 1.978554      | 1.978554      | Eos-HL-60        | 1.978554      | 1.947134      | 1.898427      | 1.898427      | 1.947134      | 1.898427      | 1.873438      |               |
| 1.918294    | 1.918294      | 1.918294      | P116 T           | 2.03352       | 2.03352       | 2.03352       | 2.03352       | 2.03352       | 1.763642      | 1.763642      |               |
| 2.260333    | 1.879055      | 1.797547      | 273T             | 1.773412      | 1.773412      | 1.773412      | 1.773412      | 1.975733      | 2.05612       | 1.975733      |               |
| 1.978089    | 1.974554      | 1.730286      | NCI-H2172        | 1.730286      | 1.730286      | 1.730286      | 1.974554      | 1.974554      | 1.730286      | 1.718142      |               |
| 1.96575     | 1.96575       | 1.96575       | KYSE-220         | 2.108322      | 2.108322      | 2.108322      | 2.108322      | 2.221167      | 2.108322      | 1.981373      |               |
| 1.89907     | 1.843924      | 1.933009      | Hs 852.T         | 2.005103      | 1.998066      | 1.998066      | 2.005103      | 2.049207      | 2.163211      | 2.049207      |               |
| 1.923261    | 1.923261      | 2.004267      | AZ-521           | 2.027682      | 2.004267      | 2.004267      | 2.004267      | 2.004267      | 1.798119      | 1.798119      |               |
| 2.375345    | 1.959056      | 1.959056      | NCI-H650         | 2.066402      | 2.066402      | 1.710911      | 1.710911      | 1.848352      | 1.848352      | 1.848352      |               |
| 2.071248    | 2.042959      | 1.851999      | 23132/87         | 1.479696      | 1.011782      | 1.011782      | 1.011782      | 1.663754      | 2.140779      | 1.727877      |               |
| 1.955761    | 2.098969      | 2.098969      | RKN              | 1.955761      | 1.955761      | 1.937612      | 1.937612      | 1.937612      | 1.834069      | 1.834069      |               |
| 2.140435    | 1.960665      | 1.960665      | HBE4-E6/E7       | 1.925646      | 1.586077      | 1.586077      | 1.586077      | 1.747233      | 1.747233      | 1.747233      |               |
| 2.147407    | 1.940986      | 1.940986      | NCI-H1299        | 2.147407      | 1.940986      | 1.852819      | 1.852819      | 2.147407      | 1.852819      | 1.838894      |               |
| 2.028196    | 1.939159      | 2.037439      | Hs 573.T         | 2.165337      | 2.229787      | 2.229787      | 1.846435      | 1.846435      | 1.846435      | 1.846435      |               |
| 2.106403    | 2.027839      | 1.962975      | Hs 737.T         | 1.903519      | 1.903205      | 1.561981      | 1.561981      | 1.561981      | 1.561981      | 1.770649      |               |

| ProbeSetID  | SNP_A-2135346 | SNP_A-4200418 | SNP_A-2166333 | SNP_A-1952822 | SNP_A-1896877 | SNP_A-4301045 | SNP_A-2050945 | SNP_A-4194333 | SNP_A-2259746 | SNP_A-4230238 | SNP_A-1989992 |
|-------------|---------------|---------------|---------------|---------------|---------------|---------------|---------------|---------------|---------------|---------------|---------------|
| Affy_SNP.ID | 7217859       | 11481086      | 7664895       | 12588794      | 11787387      | 9465412       | 5926612       | 10390310      | 9140266       | 7909743       | 2569009       |
| dbSNP       | rs17586344    | rs17586365    | rs17172432    | rs4140770     | rs6960438     | rs17172438    | rs10244108    | rs7785013     | rs759169      | rs3735061     | rs2877260     |
| Chromosome  | 7             | 7             | 7             | 7             | 7             | 7             | 7             | 7             | 7             | 7             | 7             |
| Position    | 54914607      | 54914995      | 54915526      | 54915685      | 54916117      | 54925746      | 54926546      | 54926876      | 54928845      | 54938076      | 54945838      |
| Strand      | -             | +             | +             | -             | +             | +             | +             | +             | -             | -             | +             |
| Cytoband    | p11.2         |
| 1.998615    | 1.998615      | 1.785264      | NCI-H2171     | 1.785264      | 1.752425      | 1.752425      | 1.752425      | 2.35516       | 2.35516       | 2.35516       |               |
| 2.09111     | 2.09111       | 2.09111       | G-402         | 1.928679      | 1.928679      | 1.892803      | 1.928679      | 1.928679      | 1.907171      | 1.907171      |               |
| 1.923217    | 1.916022      | 1.923217      | MEWO          | 1.923217      | 1.870029      | 1.923217      | 1.923217      | 1.984174      | 2.148189      | 1.984174      | 1.923217      |
| 1.93568     | 1.93568       | 1.935208      | CAL-120       | 1.935208      | 1.921765      | 1.700735      | 1.921765      | 1.921765      | 1.921765      | 1.921765      | 1.921765      |
| 1.922002    | 1.916557      | 1.916557      | AGS           | 1.922002      | 1.916557      | 1.916557      | 1.916557      | 1.945444      | 1.945444      | 2.008686      | 2.01419       |
| 1.913585    | 1.786585      | 1.786585      | WIL2 NS       | 1.786585      | 1.786585      | 1.786585      | 1.880514      | 1.938246      | 2.114679      | 2.114679      | 2.114679      |
| 1.906858    | 1.906858      | 1.906858      | COR-L 23/CPR  | 1.906858      | 1.878273      | 1.878273      | 1.878273      | 1.906858      | 2.06423       | 1.906858      | 1.906858      |
| 1.97726     | 1.924491      | 1.904712      | GP5D          | 1.904712      | 1.872609      | 1.834008      | 1.872609      | 1.872609      | 1.705069      | 1.837581      |               |
| 1.927969    | 1.927969      | 1.927969      | MCAS          | 1.913407      | 1.673513      | 1.399441      | 1.399441      | 1.913407      | 1.927969      | 1.650627      |               |
| 1.901206    | 1.901206      | 1.901206      | COLO-680N     | 1.901206      | 1.901206      | 1.867946      | 1.857688      | 1.857688      | 1.81758       | 1.81758       |               |
| 1.908586    | 1.90016       | 1.908586      | LS180         | 1.908586      | 1.90016       | 1.776532      | 1.776532      | 1.747248      | 1.747248      | 1.747248      |               |
| 1.896005    | 1.896005      | 1.849234      | DMS 153       | 1.837261      | 1.800996      | 1.800996      | 1.800996      | 1.837261      | 2.024909      | 2.024909      |               |
| 1.966567    | 1.894659      | 1.894659      | SBC-3         | 1.894659      | 1.430996      | 1.430996      | 1.488029      | 1.488029      | 1.488029      | 1.488029      |               |
| 2.034718    | 1.991996      | 1.77999       | HT 728.T      | 1.991996      | 1.77999       | 1.77999       | 1.77999       | 1.77999       | 1.67018       | 1.77999       |               |
| 2.20713     | 2.20713       | 2.20713       | SW 1573       | 1.926504      | 1.926504      | 1.884211      | 1.777124      | 1.777124      | 1.679274      | 1.777124      |               |
| 1.869244    | 1.802788      | 1.869244      | MKN74         | 1.895676      | 1.910105      | 1.910105      | 1.910105      | 1.910105      | 1.910105      | 1.749263      |               |
| 2.189161    | 2.189161      | 2.189161      | SAS           | 1.877083      | 1.736978      | 1.736978      | 1.859355      | 1.877083      | 1.877083      | 1.877083      |               |
| 2.014391    | 1.882213      | 1.882213      | MKN7          | 1.867145      | 1.496922      | 1.496922      | 1.496922      | 1.759412      | 1.743687      | 1.743687      |               |
| 1.979441    | 1.979441      | 1.979441      | RMG-I         | 1.674514      | 1.623534      | 1.540745      | 1.540745      | 1.674514      | 1.674514      | 1.906516      |               |
| 1.912113    | 1.912113      | 1.867145      | SVts-8        | 1.679919      | 1.679919      | 1.679919      | 1.679919      | 1.867145      | 2.014391      | 1.790605      |               |
| 1.883174    | 1.827261      | 1.861021      | Hs 894(E).Lu  | 1.861021      | 1.861021      | 1.883174      | 1.883174      | 1.883174      | 1.861021      | 1.861021      |               |
| 1.859582    | 1.859582      | 1.859582      | Hs 751.T      | 1.922343      | 1.878528      | 1.878528      | 1.789038      | 1.789038      | 1.735413      | 1.735413      |               |
| 1.889252    | 1.889252      | 1.850343      | SK-N-FI       | 1.850343      | 1.741779      | 1.741779      | 1.741779      | 1.742599      | 1.742978      | 1.742978      |               |
| 2.079681    | 1.864016      | 1.83251       | NCI-H82       | 2.036841      | 1.83251       | 1.584161      | 1.584161      | 1.83251       | 1.78444       | 1.656987      |               |
| 1.991678    | 1.987523      | 1.847911      | J GAMMA 1     | 1.847911      | 1.697372      | 1.697308      | 1.697308      | 1.65489       | 1.65489       | 1.65489       |               |
| 1.98146     | 2.003777      | 2.003777      | HSC-4         | 2.003777      | 1.961835      | 1.716392      | 1.813181      | 1.813181      | 1.716392      | 1.716392      |               |
| 1.948251    | 1.942487      | 1.860809      | BT-549        | 1.82168       | 1.784269      | 1.772132      | 1.772132      | 1.784269      | 1.772132      | 1.784269      |               |
| 1.958046    | 1.834833      | 1.834833      | KYSE-30       | 1.834833      | 1.715246      | 1.715246      | 1.715246      | 1.724498      | 1.724498      | 1.715246      |               |
| 1.933422    | 1.933422      | 1.933422      | Ca9-22        | 1.933422      | 1.834222      | 1.800455      | 1.800455      | 1.834222      | 1.800455      | 1.761857      |               |
| 1.890137    | 1.890137      | 1.890137      | NCI-H2405     | 1.773334      | 1.659001      | 1.659001      | 1.659001      | 1.773334      | 1.890137      | 1.890137      |               |
| 1.890646    | 1.829466      | 1.829466      | SNU-1         | 1.829466      | 1.772601      | 1.772601      | 1.772601      | 1.772601      | 1.829466      | 1.829466      |               |
| 1.957241    | 1.890976      | 1.822954      | BPH-1         | 1.822954      | 1.667432      | 1.792125      | 1.792125      | 1.792125      | 1.792125      | 1.792125      |               |
| 1.879792    | 1.841654      | 1.785699      | NCI-H1944     | 1.785699      | 1.785699      | 1.548246      | 1.548246      | 1.785699      | 1.548246      | 1.850252      |               |
| 2.180352    | 2.180352      | 1.869018      | HSC-2         | 1.869018      | 1.752236      | 1.677613      | 1.752236      | 1.752236      | 1.677613      | 1.752236      |               |
| 1.929906    | 1.956787      | 1.929906      | BICR 31       | 1.770836      | 1.726735      | 1.726735      | 1.770836      | 1.726735      | 1.542706      | 1.542706      |               |
| 1.753698    | 1.799248      | 1.799248      | KYSE-50       | 1.834604      | 1.799248      | 1.799248      | 1.723625      | 1.799248      | 1.723625      | 1.723625      |               |
| 2.223692    | 2.121907      | 1.985493      | NCI-H1915     | 1.584745      | 1.526041      | 1.526041      | 1.526041      | 1.584745      | 1.584745      | 1.584745      |               |
| 1.807218    | 1.772413      | 1.772413      | D341 Med      | 1.772413      | 1.571754      | 1.571754      | 1.571754      | 1.571754      | 1.571754      | 1.571754      |               |
| 1.778293    | 1.766194      | 1.778293      | PE/CA-PJ15    | 1.778293      | 1.766194      | 1.754892      | 1.754892      | 1.754892      | 1.754892      | 1.754892      |               |
| 1.711868    | 1.711868      | 1.711868      | KYSE-510      | 1.810039      | 1.810039      | 1.865423      | 1.865423      | 1.873453      | 1.873453      | 1.83955       |               |
| 2.238168    | 2.238168      | 2.187147      | KOSC-2 cl3-43 | 1.9272        | 1.756854      | 1.749263      | 1.756854      | 1.756854      | 1.749263      | 1.749263      |               |
| 2.107238    | 2.107238      | 2.107238      | OUMS-23       | 1.398161      | 1.340194      | 1.340194      | 1.340194      | 1.398161      | 1.398161      | 1.398161      |               |
| 1.795395    | 1.795395      | 1.795395      | HT1080        | 1.716312      | 1.709252      | 1.709252      | 1.709252      | 1.716312      | 1.716312      | 1.716312      |               |
| 1.748791    | 1.748791      | 1.839748      | JURKAT EC-1   | 2.026982      | 1.73293       | 1.73293       | 1.633969      | 1.541303      | 1.541303      | 1.73293       |               |
| 1.85743     | 1.846101      | 1.746288      | COR-L88       | 1.746288      | 1.662522      | 1.436193      | 1.436193      | 1.436193      | 1.358055      | 1.358055      |               |
| 1.777514    | 1.744822      | 1.744822      | DOR           | 1.744822      | 1.707448      | 1.735445      | 1.735445      | 1.735445      | 1.735445      | 1.735445      |               |
| 1.849249    | 1.799743      | 1.736552      | NCI-H838      | 1.736552      | 1.386175      | 1.386175      | 1.386175      | 1.736552      | 1.708279      | 1.708279      |               |



| ProbeSetID  | SNP_A-2135346 | SNP_A-4200418 | SNP_A-2166333   | SNP_A-1952822 | SNP_A-1896871 | SNP_A-4301043 | SNP_A-2050943 | SNP_A-4194333 | SNP_A-2259746 | SNP_A-4230238 | SNP_A-1989992 |
|-------------|---------------|---------------|-----------------|---------------|---------------|---------------|---------------|---------------|---------------|---------------|---------------|
| Affy_SNP.ID | 7217859       | 11481086      | 7664895         | 12588794      | 11787387      | 9465412       | 5926612       | 10390310      | 9140266       | 7909743       | 2569009       |
| dbSNP       | rs17586344    | rs17586365    | rs17172432      | rs4140770     | rs6960438     | rs17172438    | rs10244108    | rs7785013     | rs759169      | rs3735061     | rs2877260     |
| Chromosome  | 7             | 7             | 7               | 7             | 7             | 7             | 7             | 7             | 7             | 7             | 7             |
| Position    | 54914607      | 54914995      | 54915526        | 54915685      | 54916117      | 54925746      | 54926546      | 54926876      | 54928845      | 54938076      | 54945838      |
| Strand      | -             | +             | +               | -             | +             | +             | +             | +             | -             | -             | +             |
| Cytoband    | p11.2         | p11.2         | p11.2           | p11.2         | p11.2         | p11.2         | p11.2         | p11.2         | p11.2         | p11.2         | p11.2         |
| 2.04259     | 1.843055      | 1.833977      | NCI-H358        | 1.616292      | 1.601406      | 1.601406      | 1.601406      | 1.616292      | 1.544582      | 1.544582      |               |
| 1.799032    | 1.799032      | 1.72264       | NCI-H1048       | 1.72264       | 1.582111      | 1.582111      | 1.582111      | 1.72264       | 1.582111      | 1.582111      |               |
| 1.832067    | 1.832067      | 1.832067      | ME-180          | 1.818763      | 1.152715      | 1.152715      | 1.152715      | 1.283         | 1.283         | 1.236571      | 1.236571      |
| 2.055964    | 1.934809      | 1.934809      | A431            | 1.711788      | 1.429045      | 1.429045      | 1.480405      | 1.711788      | 1.711788      | 1.711788      | 1.711788      |
| 1.798831    | 1.655427      | 1.655427      | Hs 834.T        | 1.655427      | 1.588674      | 1.588674      | 1.588674      | 1.655427      | 1.749468      | 1.749468      | 1.749468      |
| 1.766147    | 1.718126      | 1.718126      | LS 123          | 1.766147      | 1.718126      | 1.718126      | 1.686649      | 1.686649      | 1.491094      | 1.491094      | 1.491094      |
| 1.979441    | 1.940058      | 1.849158      | NCI-H1703       | 1.545292      | 1.545292      | 1.496768      | 1.496768      | 1.496768      | 1.369566      | 1.496768      | 1.496768      |
| 1.793939    | 1.793939      | 1.691614      | VM-CUB1         | 1.691614      | 1.583095      | 1.583095      | 1.581944      | 1.583095      | 1.583095      | 1.583095      | 1.581944      |
| 1.742079    | 1.742079      | 1.691582      | KYSE-180        | 1.691582      | 1.115124      | 1.115124      | 1.115124      | 1.691582      | 1.691582      | 1.213775      | 1.213775      |
| 1.688434    | 1.68673       | 1.688434      | NCI-H1435       | 1.688434      | 1.688434      | 1.642016      | 1.597578      | 1.597578      | 1.463583      | 1.597578      | 1.597578      |
| 1.687051    | 1.654565      | 1.62544       | KYSE-450        | 1.62544       | 1.62544       | 1.62133       | 1.62133       | 1.654565      | 1.731584      | 1.731584      | 1.731584      |
| 1.695994    | 1.695994      | 1.695994      | ABC-1           | 1.821465      | 1.631151      | 1.531069      | 1.821465      | 1.821465      | 1.427392      | 1.581544      | 1.581544      |
| 2.272803    | 1.809793      | 1.739901      | Ishikawa (Herak | 1.581711      | 1.485461      | 1.485461      | 1.485461      | 1.485461      | 1.485461      | 1.485461      | 1.485461      |
| 1.630331    | 1.621594      | 1.630331      | NUGC-3          | 1.894255      | 1.894255      | 1.894255      | 1.938629      | 1.938629      | 1.938629      | 1.938629      | 1.686424      |
| 2.142015    | 1.862549      | 1.632151      | G-292 Clone A1  | 1.632151      | 1.586493      | 1.586493      | 1.586493      | 1.632151      | 1.553404      | 1.553404      | 1.553404      |
| 1.743687    | 1.743687      | 1.711979      | U-2 OS          | 1.531069      | 1.531069      | 1.091937      | 1.091937      | 1.444932      | 1.444932      | 1.444932      | 1.444932      |
| 2.075495    | 1.777872      | 1.612912      | WI-26 VA4       | 1.612912      | 1.475702      | 1.475702      | 1.475702      | 1.612912      | 1.475702      | 1.475702      | 1.475702      |
| 1.946282    | 1.950923      | 1.950923      | HSC-3           | 1.946282      | 1.900101      | 1.579158      | 1.60895       | 1.60895       | 1.491559      | 1.491559      | 1.491559      |
| 1.606156    | 1.596084      | 1.606156      | NCI-H1155       | 1.606156      | 1.880484      | 1.549157      | 1.549157      | 1.549157      | 1.361765      | 1.422602      | 1.422602      |
| 1.533309    | 2.054025      | 2.054025      | HLE             | 1.824073      | 1.671347      | 1.502773      | 1.33404       | 1.33404       | 1.207269      | 1.33404       | 1.33404       |
| 1.783383    | 1.642882      | 1.642882      | TCO-1           | 1.500115      | 1.500115      | 1.500115      | 1.550607      | 1.550607      | 1.500115      | 1.500115      | 1.500115      |
| 1.805614    | 1.805614      | 1.805614      | NCI-H2122       | 1.612302      | 1.612302      | 1.612302      | 1.491989      | 1.578307      | 1.491989      | 1.491989      | 1.491989      |
| 1.896948    | 1.896948      | 1.896948      | HO-1-u-1        | 1.878258      | 1.499806      | 1.422073      | 1.483547      | 1.483547      | 1.422073      | 1.422073      | 1.422073      |
| 1.681482    | 1.625276      | 1.625276      | OVISE           | 1.596084      | 1.350078      | 1.056803      | 1.350078      | 1.350078      | 1.262972      | 1.262972      | 1.262972      |
| 1.560923    | 1.569711      | 1.569711      | JIMT-1          | 1.569711      | 1.569711      | 1.560923      | 1.560923      | 1.560923      | 1.486513      | 1.486513      | 1.486513      |
| 1.559225    | 1.559225      | 1.559225      | GCT             | 1.634182      | 1.559225      | 1.425808      | 1.425808      | 1.634182      | 1.425808      | 1.425808      | 1.425808      |
| 1.764879    | 1.575099      | 1.575099      | HCE7            | 1.532376      | 1.532376      | 1.467941      | 1.467941      | 1.467941      | 1.449091      | 1.449091      | 1.449091      |
| 1.700815    | 1.700815      | 1.700815      | EPLC-272H       | 1.51988       | 1.229118      | 1.078447      | 1.078447      | 1.229118      | 1.078447      | 1.229118      | 1.229118      |
| 1.619915    | 1.619915      | 1.619915      | SKN-3           | 1.486289      | 1.469727      | 1.383551      | 1.383551      | 1.383551      | 1.308174      | 1.308174      | 1.308174      |
| 1.540136    | 1.540136      | 1.532783      | NCI-H596        | 1.540136      | 1.532783      | 1.532783      | 1.277556      | 1.325049      | 1.277556      | 1.277556      | 1.043167      |
| 1.6904903   | 1.657718      | 1.5713857     | NL20-TA         | 1.4062546     | 1.2869552     | 1.2869552     | 1.2869552     | 1.4062546     | 1.2417358     | 0.9188213     | 0.9188213     |
| 2.101073    | 2.101073      | 1.911132      | Hs 839.T        | 1.486995      | 1.349446      | 1.161179      | 1.349446      | 1.479333      | 1.479333      | 1.486995      | 1.486995      |
| 1.481061    | 1.420345      | 1.420345      | KYSE-270        | 1.482494      | 1.482494      | 1.482494      | 1.482494      | 1.482494      | 1.482494      | 1.482494      | 1.482494      |
| 1.5332242   | 1.5332242     | 1.5332242     | ASH-3           | 1.4633571     | 1.0416993     | 0.6029178     | 0.6029178     | 1.0416993     | 1.0416993     | 1.0416993     | 1.0416993     |
| 1.571386    | 1.494878      | 1.477639      | MG 63           | 1.290444      | 1.105502      | 1.105502      | 1.105502      | 1.105502      | 1.072862      | 1.072862      | 1.072862      |
| 1.581811    | 1.40831       | 1.379672      | NCI-H522        | 1.350421      | 1.051937      | 1.051937      | 1.051937      | 1.051937      | 1.051937      | 1.051937      | 1.051937      |
| 1.482494    | 1.482494      | 1.336256      | T.T             | 1.336256      | 1.297796      | 1.297796      | 1.297796      | 1.336256      | 1.297796      | 1.297796      | 1.297796      |
| 1.334058    | 1.334058      | 1.334058      | T47D            | 1.317182      | 1.288082      | 1.125496      | 1.24014       | 1.288082      | 1.24014       | 1.24014       | 1.24014       |
| 1.591883    | 1.591883      | 1.591883      | SCC-4           | 1.331222      | 1.314036      | 1.259058      | 1.259058      | 1.259058      | 1.120295      | 1.120295      | 1.120295      |
| 1.468964    | 1.295384      | 1.271063      | KYSE-520        | 1.295384      | 1.295384      | 1.189498      | 1.189498      | 1.295384      | 1.323572      | 1.448724      | 1.448724      |
| 1.4561719   | 1.4070343     | 1.4070343     | RERF-LC-Sq1     | 1.1816543     | 0.8110917     | 0.8110917     | 0.8110917     | 1.1065244     | 1.1065244     | 0.8192055     | 0.8192055     |
| 1.2974278   | 1.2974278     | 1.2974278     | PCI 4B          | 1.2734951     | 1.2734951     | 1.1000873     | 0.9104992     | 0.9104992     | 0.8192706     | 0.8192706     | 0.8192706     |
| 1.794636    | 1.399085      | 1.254747      | NCI-H1568       | 1.254747      | 1.135441      | 1.135441      | 1.135441      | 1.254747      | 1.254747      | 1.254747      | 1.254747      |
| 1.495961    | 1.495961      | 1.495961      | OSC-20          | 1.486272      | 1.318041      | 1.214457      | 1.214457      | 1.214457      | 1.214457      | 1.214457      | 1.214457      |
| 1.4273916   | 1.3198491     | 1.3198491     | RERF-LC-MA      | 1.1506247     | 0.6438562     | 0.4775737     | 0.4775737     | 1.1506247     | 0.9293365     | 0.9293365     | 0.9293365     |
| 1.246048    | 1.246048      | 1.246048      | BICR10          | 1.246048      | 1.246048      | 1.225724      | 1.189919      | 1.189919      | 1.189919      | 1.189919      | 1.189919      |
| 1.228044    | 1.228044      | 1.228044      | OE21            | 1.196197      | 1.188734      | 1.128425      | 1.150412      | 1.150412      | 1.128425      | 1.128425      | 1.128425      |

| ProbeSetID  | SNP_A-2135346 | SNP_A-4200418 | SNP_A-2166333 | SNP_A-1952822 | SNP_A-1896874 | SNP_A-4301045 | SNP_A-2050942 | SNP_A-4194332 | SNP_A-2259746 | SNP_A-4230238 | SNP_A-1989992 |
|-------------|---------------|---------------|---------------|---------------|---------------|---------------|---------------|---------------|---------------|---------------|---------------|
| Affy.SNP.ID | 7217859       | 11481086      | 7664895       | 12588794      | 11787387      | 9465412       | 5926612       | 10390310      | 9140266       | 7909743       | 2569009       |
| dbSNP       | rs17586344    | rs17586365    | rs17172432    | rs4140770     | rs6960438     | rs17172438    | rs10244108    | rs7785013     | rs759169      | rs3735061     | rs2877260     |
| Chromosome  | 7             | 7             | 7             | 7             | 7             | 7             | 7             | 7             | 7             | 7             | 7             |
| Position    | 54914607      | 54914995      | 54915526      | 54915685      | 54916117      | 54925746      | 54926546      | 54926876      | 54928845      | 54938076      | 54945838      |
| Strand      | -             | +             | +             | -             | +             | +             | +             | +             | -             | -             | +             |
| Cytoband    | p11.2         |
| 1.129069    | 1.129069      | 1.15668       | RERF-LC-Ad2   | 1.236402      | 1.236402      | 1.236402      | 1.497214      | 1.497214      | 1.236402      | 1.236402      |               |
| 0.9685444   | 0.9685444     | 1.0113754     | SKOV3         | 1.0113754     | 1.0113754     | 1.0113754     | 1.0426041     | 1.0426041     | 1.0426041     | 1.0992004     |               |
| 1.019878    | 1.019878      | 1.019878      | T.Tn          | 1.019878      | 0.9251308     | 0.7779219     | 0.7779219     | 0.9251308     | 0.7779219     | 0.7779219     |               |
| 0.9617503   | 1.0602814     | 1.0602814     | OAW28         | 0.9460151     | 0.9460151     | 0.9460151     | 1.0147267     | 1.1441107     | 1.1593644     | 1.5892559     |               |
| 1.0865166   | 1.052959      | 0.947366      | NCI-H1563     | 0.947366      | 0.8467476     | 0.5995443     | 0.5995443     | 0.8467476     | 0.8467476     | 0.6627455     |               |
| 0.8900125   | 0.8900125     | 0.914327      | PNT2          | 0.9777086     | 0.9777086     | 0.6220993     | 0.5957445     | 0.6220993     | 0.6220993     | 0.6220993     |               |
| 0.8192706   | 0.7912006     | 0.8192706     | NCI-N87       | 1.0172224     | 0.8192706     | 0.8192706     | 0.8192706     | 0.8192706     | 0.8192706     | 0.7970291     |               |
| 0.7998296   | 0.7998296     | 0.7998296     | NCI-H2228     | 0.7691386     | 0.5840321     | 0.5840321     | 0.5840321     | 0.5840321     | 0.5038623     | 0.428946      |               |
| 0.6931083   | 0.6931083     | 0.764117      | MES-SA        | 0.7979483     | 0.7979483     | 0.764117      | 0.6839943     | 0.7291        | 0.6839943     | 0.6839943     |               |
| 0.6945376   | 0.6945376     | 0.6945376     | WPE1-NB26     | 0.5229413     | 0.3940197     | 0.3940197     | 0.3940197     | 0.5229413     | 0.5229413     | 0.5229413     |               |
| 0.6227272   | 0.5817452     | 0.5817452     | NCI-H322      | 0.5817452     | 0.5637644     | 0.4553836     | 0.4005065     | 0.4005065     | 0.3921312     | 0.3921312     |               |
| 0.27500705  | 0.16812853    | 0.16812853    | LU99A         | 0.0571383     | -0.05829269   | -0.05829269   | -0.05829269   | 0             | 0             | 0             |               |

| ProbeSetID    | SNP_A-1989993 | SNP_A-2075433 | SNP_A-1867443 | SNP_A-2145133 | SNP_A-2236084 | SNP_A-2196993 | SNP_A-1989993 | SNP_A-2212413 | SNP_A-1958322 | SNP_A-2024856 | SNP_A-1959701 |
|---------------|---------------|---------------|---------------|---------------|---------------|---------------|---------------|---------------|---------------|---------------|---------------|
| Affy_SNP.ID   | 2569010       | 6293987       | 11350852      | 7356959       | 8796070       | 8136360       | 2569034       | 8389173       | 12670418      | 5521926       | 12690481      |
| dbSNP         | rs2110290     | rs12671550    | rs7803660     | rs7796139     | rs980653      | rs13244925    | rs10488142    | rs17172446    | rs6947594     | rs12666347    | rs17172448    |
| Chromosome    | 7             | 7             | 7             | 7             | 7             | 7             | 7             | 7             | 7             | 7             | 7             |
| Position      | 54946977      | 54947884      | 54948280      | 54950085      | 54960099      | 54966465      | 54970156      | 54976807      | 54977506      | 54980139      | 54981429      |
| Strand        | -             | +             | +             | +             | +             | +             | -             | +             | +             | +             | +             |
| Cytoband      | p11.2         |
| KYSE-520      | 6.810133      | 6.810133      | 6.810133      | 6.911036      | 7.123581      | 6.911036      | 6.810133      | 6.810133      | 7.022481      | 7.077002      | 7.022481      |
| OE21          | 6.763342      | 6.763342      | 6.763342      | 7.025238      | 7.12099       | 7.025238      | 7.025238      | 7.025238      | 6.676592      | 7.12099       | 6.674109      |
| H3255         | 6.387916      | 6.387916      | 6.387916      | 6.387916      | 6.436391      | 6.071772      | 6.071772      | 6.436391      | 6.76763       | 6.76763       | 6.76763       |
| NCI-H1573     | 6.228164      | 6.228164      | 6.228164      | 6.271808      | 6.393148      | 6.271808      | 6.271808      | 6.393148      | 6.651435      | 6.651435      | 6.651435      |
| HSC-2         | 5.862791      | 5.862791      | 5.862791      | 6.07028       | 6.164015      | 6.07028       | 6.056095      | 6.056095      | 6.056095      | 6.305957      | 6.056095      |
| HCC-827       | 5.592099      | 5.592099      | 5.592099      | 5.890594      | 5.929655      | 5.940205      | 5.940205      | 5.940205      | 5.940205      | 6.067734      | 5.940205      |
| Hs 852.T      | 5.225252      | 5.095803      | 5.225252      | 5.225252      | 5.320132      | 5.320132      | 5.320132      | 5.380848      | 5.689587      | 5.69901       | 5.69901       |
| KYSE-30       | 5.370001      | 5.370001      | 5.370001      | 5.543344      | 5.561594      | 5.543344      | 5.543344      | 5.561594      | 5.660296      | 5.682268      | 5.682268      |
| A431          | 5.412951      | 5.406551      | 5.406551      | 5.412951      | 5.412951      | 5.412951      | 5.412951      | 5.412951      | 5.403763      | 5.403763      | 5.311354      |
| BT-20         | 5.165112      | 5.165112      | 5.165112      | 5.165112      | 5.255214      | 4.98627       | 4.98627       | 5.03707       | 5.03707       | 5.255214      | 5.03707       |
| Ca9-22        | 4.64452       | 4.447982      | 4.607766      | 4.64452       | 4.801972      | 4.801972      | 4.607766      | 4.894021      | 5.002894      | 5.077503      | 5.002894      |
| NCI-H1568     | 4.345007      | 4.234798      | 4.234798      | 4.234798      | 4.299728      | 4.299728      | 4.299728      | 4.300957      | 4.40944       | 4.639796      | 4.639796      |
| PC-9          | 4.277177      | 4.198772      | 4.198772      | 4.198772      | 4.198772      | 4.130393      | 4.130393      | 4.198772      | 4.228008      | 4.228008      | 4.533135      |
| PNT1A         | 4.25082       | 4.19421       | 4.19421       | 4.25082       | 4.325935      | 4.325935      | 4.325935      | 4.355007      | 4.423277      | 4.433431      | 4.433431      |
| LUDLU-1       | 4.302562      | 4.302562      | 4.302562      | 4.302562      | 4.328124      | 4.218594      | 4.218594      | 4.328124      | 4.328124      | 4.385474      | 4.342817      |
| RERF-LC-MA    | 4.078277      | 4.078277      | 4.078277      | 4.085289      | 4.085289      | 4.078277      | 4.014391      | 4.078277      | 4.078277      | 4.228734      | 4.228734      |
| U373 MG       | 3.932433      | 3.932433      | 3.987465      | 4.19363       | 4.19363       | 3.999538      | 3.987465      | 3.987465      | 3.987465      | 3.987465      | 3.987465      |
| KYSE-450      | 3.839512      | 3.839512      | 3.848588      | 3.850594      | 3.891358      | 3.850594      | 3.850594      | 3.891358      | 3.891358      | 4.196933      | 4.196933      |
| KOSC-2 cl3-43 | 3.891889      | 3.891889      | 3.891889      | 3.891889      | 3.891889      | 3.96648       | 3.891889      | 3.891889      | 3.836376      | 3.96648       | 3.836376      |
| LU65          | 3.742142      | 3.719327      | 3.519079      | 3.519079      | 3.742142      | 3.519079      | 3.445273      | 3.519079      | 3.763611      | 3.844304      | 3.763611      |
| PC-14         | 3.68137       | 3.54121       | 3.522732      | 3.522732      | 3.54121       | 3.54121       | 3.54121       | 3.752228      | 3.782379      | 3.8063        | 3.782379      |
| NCI-H596      | 3.805698      | 3.645819      | 3.645819      | 3.645819      | 3.805698      | 3.607008      | 3.607008      | 3.6606        | 3.6606        | 3.805698      | 3.846534      |
| PC-3 [JPC-3]  | 3.759412      | 3.573193      | 3.573193      | 3.556417      | 3.556417      | 3.453662      | 3.383068      | 3.453662      | 3.556417      | 3.581544      | 3.564817      |
| 647-V         | 3.633134      | 3.633134      | 3.633134      | 3.665173      | 3.633134      | 3.665173      | 3.633134      | 3.633134      | 3.61471       | 3.69285       | 3.544312      |
| HSC-3         | 3.278307      | 3.278307      | 3.534462      | 3.536572      | 3.689422      | 3.749374      | 3.689422      | 3.689422      | 3.749374      | 3.750396      | 3.749374      |
| CASKI         | 3.576586      | 3.576586      | 3.576586      | 3.576586      | 3.576586      | 3.723045      | 3.723045      | 3.723045      | 3.723045      | 3.760595      | 3.723045      |
| JHH-4         | 3.541971      | 3.541971      | 3.541971      | 3.896589      | 3.896589      | 3.915621      | 3.896589      | 3.896589      | 3.34333       | 3.915621      | 3.34333       |
| CAL-85-1      | 3.469467      | 3.516086      | 3.516086      | 3.66219       | 3.66219       | 3.66219       | 3.66219       | 3.66219       | 3.676831      | 3.719764      | 3.676831      |
| BT-549        | 3.573703      | 3.573703      | 3.576227      | 3.603244      | 3.605214      | 3.605214      | 3.576227      | 3.576227      | 3.605214      | 3.621248      | 3.605214      |
| HSC-4         | 3.450828      | 3.450828      | 3.450828      | 3.724958      | 3.450828      | 3.822233      | 3.450828      | 3.450828      | 3.265616      | 3.822233      | 3.265616      |
| NUGC-4        | 3.444932      | 3.365147      | 3.365147      | 3.365147      | 3.365147      | 3.338054      | 3.255214      | 3.338054      | 3.338054      | 3.365147      | 3.365147      |
| BICR10        | 3.562107      | 3.162741      | 3.162741      | 3.162741      | 3.315289      | 3.315289      | 3.315289      | 3.451125      | 3.451125      | 3.549798      | 3.451125      |
| KYSE-140      | 3.423342      | 3.55894       | 3.414961      | 3.380047      | 3.55894       | 3.380047      | 3.380047      | 3.55894       | 3.55894       | 3.567433      | 3.55894       |
| SNU-5         | 3.418943      | 3.331158      | 3.384649      | 3.418943      | 3.418943      | 3.384649      | 3.281381      | 3.384649      | 3.418943      | 3.508005      | 3.508005      |
| SK-MEL-3      | 3.671889      | 3.342804      | 3.342804      | 3.342804      | 3.342804      | 3.329676      | 3.329676      | 3.342804      | 3.342804      | 3.792404      | 3.792404      |
| KYSE-180      | 3.391391      | 3.391391      | 3.350747      | 3.400959      | 3.44654       | 3.400959      | 3.350747      | 3.383399      | 3.44654       | 3.456599      | 3.44654       |
| PNT2          | 3.344443      | 3.344443      | 3.344443      | 3.344443      | 3.344443      | 3.387888      | 3.387888      | 3.43292       | 3.596798      | 3.609776      | 3.596798      |
| G-361         | 3.419261      | 3.415262      | 3.415262      | 3.415262      | 3.419261      | 3.415262      | 3.366944      | 3.415262      | 3.43471       | 3.580101      | 3.580101      |
| KYSE-220      | 3.150044      | 3.150044      | 3.228393      | 3.228393      | 3.278242      | 3.278242      | 3.278242      | 3.278242      | 3.309952      | 3.322587      | 3.416851      |
| WM-115        | 3.272539      | 3.272539      | 3.272539      | 3.217533      | 3.217533      | 3.217533      | 3.125027      | 3.33799       | 3.389698      | 3.47088       | 3.47088       |
| KYSE-50       | 3.178913      | 2.985901      | 2.861266      | 2.861266      | 2.985901      | 2.985901      | 2.861266      | 2.985901      | 3.272484      | 3.644571      | 3.644571      |
| OSC-20        | 3.366962      | 3.247106      | 3.247106      | 3.247106      | 3.247106      | 3.247106      | 3.074493      | 3.254485      | 3.254485      | 3.451482      | 3.254485      |

| ProbeSetID         | SNP_A-1989993 | SNP_A-2075433 | SNP_A-1867443 | SNP_A-2145133 | SNP_A-2236083 | SNP_A-2196993 | SNP_A-1989993 | SNP_A-2212413 | SNP_A-1958323 | SNP_A-2024853 | SNP_A-1959703 |
|--------------------|---------------|---------------|---------------|---------------|---------------|---------------|---------------|---------------|---------------|---------------|---------------|
| Affy_SNP.ID        | 2569010       | 6293987       | 11350852      | 7356959       | 8796070       | 8136360       | 2569034       | 8389173       | 12670418      | 5521926       | 12690481      |
| dbSNP              | rs2110290     | rs12671550    | rs7803660     | rs7796139     | rs980653      | rs13244925    | rs10488142    | rs17172446    | rs6947594     | rs12666347    | rs17172448    |
| Chromosome         | 7             | 7             | 7             | 7             | 7             | 7             | 7             | 7             | 7             | 7             | 7             |
| Position           | 54946977      | 54947884      | 54948280      | 54950085      | 54960099      | 54966465      | 54970156      | 54976807      | 54977506      | 54980139      | 54981429      |
| Strand             | -             | +             | +             | +             | +             | +             | -             | +             | +             | +             | +             |
| Cytoband           | p11.2         |
| SAT                | 3.499189      | 3.499189      | 3.499189      | 3.613984      | 3.613984      | 3.499189      | 3.410532      | 3.410532      | 3.410532      | 3.646178      | 3.410532      |
| NCI-H1650          | 3.250625      | 3.250625      | 3.226752      | 3.250625      | 3.226752      | 3.226752      | 3.21881       | 3.226752      | 3.226752      | 3.286336      | 3.286336      |
| SK-CO-1            | 3.298624      | 3.214665      | 3.083634      | 3.083634      | 3.083634      | 3.083634      | 3.083634      | 3.104548      | 3.312425      | 3.359676      | 3.312425      |
| NCI-H1792          | 3.210818      | 3.210818      | 3.097603      | 3.307588      | 3.307588      | 3.326225      | 3.326225      | 3.326225      | 3.495952      | 3.466622      | 3.466622      |
| NCI-H1703          | 3.350656      | 3.350656      | 3.31151       | 3.350656      | 3.350656      | 3.355215      | 3.350656      | 3.350656      | 3.350656      | 3.350656      | 3.31151       |
| PCI 4B             | 3.196797      | 3.196797      | 3.139215      | 3.139215      | 3.216227      | 3.493305      | 3.493305      | 3.389636      | 3.493305      | 3.493305      | 3.447126      |
| NCI-H1563          | 3.165517      | 3.165517      | 2.929295      | 2.904189      | 2.994152      | 2.904189      | 2.786788      | 2.904189      | 2.994152      | 3.065561      | 2.994152      |
| NCI-H841           | 3.198607      | 3.198607      | 3.198607      | 3.258508      | 3.258508      | 3.258508      | 3.210031      | 3.26769       | 3.26769       | 3.339659      | 3.339659      |
| LOU-NH91           | 3.150625      | 3.236477      | 3.236477      | 3.255214      | 3.236477      | 3.111632      | 3.042101      | 3.111632      | 3.111632      | 3.255214      | 3.111632      |
| HuH-7              | 3.248015      | 3.248015      | 3.248015      | 3.156129      | 3.14575       | 3.145741      | 3.132062      | 3.145741      | 3.132062      | 3.145741      | 3.132062      |
| LC-1 sq            | 3.244118      | 3.244118      | 3.244118      | 3.270998      | 3.270998      | 3.317127      | 3.270998      | 3.270998      | 3.317127      | 3.325277      | 3.317127      |
| NCI-H522           | 3.343293      | 3.25499       | 3.25499       | 3.343293      | 3.343293      | 3.315966      | 3.25499       | 3.315966      | 3.346851      | 3.315966      | 3.23984       |
| 201T               | 2.996777      | 2.996777      | 2.996777      | 3.080531      | 3.080531      | 3.080531      | 3.080531      | 3.080531      | 3.209689      | 3.219482      | 3.209689      |
| G-292 Clone A141B1 | 3.246704      | 3.178798      | 3.068352      | 3.068352      | 3.273746      | 3.346851      | 3.189576      | 3.288949      | 3.288949      | 3.288949      | 3.111819      |
| RPMI-7951          | 2.930215      | 2.930215      | 2.889567      | 3.075119      | 3.237276      | 3.237276      | 3.136163      | 3.237276      | 3.251775      | 3.27814       | 3.27814       |
| BEN                | 3.072106      | 3.072106      | 3.072106      | 2.801076      | 3.072106      | 3.072106      | 2.801076      | 2.801076      | 2.801076      | 3.208143      | 2.918863      |
| NCI-H2228          | 2.871503      | 2.854193      | 2.807179      | 2.807179      | 2.807179      | 2.786316      | 2.786316      | 2.807179      | 3.14985       | 3.203498      | 3.203498      |
| HCC-44             | 3.045739      | 3.042494      | 3.045739      | 3.045739      | 3.05395       | 3.045739      | 3.042494      | 3.045739      | 3.042494      | 3.05395       | 3.042494      |
| NCI-H1734          | 3.065023      | 3.050554      | 3.050554      | 2.890712      | 2.890712      | 2.890712      | 2.890712      | 2.993099      | 2.993099      | 2.993099      | 2.851112      |
| YKG-1              | 3.033795      | 3.033795      | 3.033795      | 3.146245      | 3.364257      | 3.146245      | 3.033795      | 3.033795      | 3.033795      | 3.146245      | 3.146245      |
| MOG-G-CCM          | 2.86254       | 2.849092      | 2.828661      | 2.849092      | 3.031173      | 2.961564      | 2.849092      | 2.961564      | 3.031173      | 3.031173      | 3.195196      |
| SK-BR-3            | 3.021924      | 3.021924      | 3.021924      | 3.111632      | 3.011782      | 2.970854      | 2.970854      | 2.970854      | 2.970854      | 3.111632      | 2.970854      |
| COLO 858           | 3.086051      | 2.99048       | 2.884603      | 3.086051      | 3.259441      | 3.014686      | 2.884603      | 2.901488      | 3.014686      | 3.117069      | 3.014686      |
| SCC-4              | 2.968483      | 2.968483      | 2.968483      | 3.075656      | 2.968483      | 3.075656      | 3.075656      | 3.281205      | 3.075656      | 3.281205      | 3.075656      |
| TE7                | 3.072852      | 3.067934      | 3.067934      | 3.072852      | 3.067934      | 2.973552      | 2.922271      | 2.922271      | 2.922271      | 2.922271      | 2.922271      |
| NCI-H1755          | 2.972533      | 2.932106      | 2.932106      | 2.972533      | 2.988022      | 2.972533      | 2.932106      | 2.932106      | 2.988022      | 3.056232      | 3.110788      |
| CaR-1              | 3.140528      | 3.140528      | 3.140528      | 3.168405      | 3.168405      | 3.060541      | 3.046502      | 3.060541      | 3.046502      | 3.060541      | 3.046502      |
| OVISe              | 2.98711       | 2.978038      | 2.978038      | 2.978038      | 3.062548      | 2.964705      | 2.872409      | 2.964705      | 2.964705      | 2.973583      | 2.964705      |
| Calu-3             | 2.968905      | 2.960385      | 2.947605      | 2.947605      | 2.947605      | 2.947605      | 2.947605      | 2.968905      | 3.045146      | 3.340448      | 3.045146      |
| NCI-H1623          | 2.864433      | 2.864433      | 2.864433      | 2.864433      | 2.966213      | 2.864433      | 2.864433      | 2.966213      | 2.966213      | 3.001706      | 3.001706      |
| BICR 78            | 3.091729      | 2.98919       | 2.950678      | 2.950678      | 2.950678      | 2.950678      | 2.950678      | 2.950678      | 2.950678      | 3.082782      | 3.082782      |
| LS 123             | 2.946317      | 2.751925      | 2.743541      | 2.751925      | 2.946317      | 2.946317      | 2.946317      | 2.946317      | 3.095048      | 3.233732      | 3.233732      |
| AN3CA              | 3.098264      | 3.059462      | 3.006993      | 2.929357      | 2.923445      | 2.923445      | 2.923445      | 2.929357      | 2.929357      | 3.010512      | 3.010512      |
| 639-V              | 3.045247      | 3.05393       | 3.05393       | 3.05393       | 3.05393       | 3.045247      | 3.000034      | 2.939334      | 2.939334      | 2.939334      | 2.923518      |
| WM 266-4           | 2.932147      | 2.930068      | 2.743898      | 2.930068      | 2.758188      | 2.758188      | 2.758188      | 2.764571      | 2.764571      | 2.934027      | 2.764571      |
| SKN-3              | 3.029406      | 2.845994      | 2.845994      | 3.029406      | 3.029406      | 3.034188      | 2.770619      | 2.782018      | 2.782018      | 3.034188      | 2.782018      |
| NCI-H2085          | 2.956287      | 2.783821      | 2.719346      | 2.719346      | 2.783821      | 2.769006      | 2.769006      | 2.783821      | 2.975518      | 3.280992      | 2.975518      |
| RKN                | 2.946472      | 2.798058      | 2.92781       | 3.062369      | 3.062369      | 3.087655      | 3.062369      | 3.062369      | 2.92781       | 3.062369      | 2.92781       |
| MKN45              | 2.917551      | 2.915472      | 2.915472      | 2.917551      | 2.93364       | 2.93364       | 2.917551      | 2.917551      | 2.93364       | 2.972131      | 2.93364       |
| KHOS/NP            | 2.898552      | 2.898552      | 2.89373       | 2.79313       | 2.79313       | 2.79313       | 2.68205       | 3.009302      | 3.065113      | 3.102904      | 3.009302      |
| SNU-16             | 2.945984      | 2.899323      | 2.899323      | 2.899323      | 2.899323      | 2.898964      | 2.803598      | 2.898964      | 3.06163       | 3.06163       | 3.0794        |
| HCE7               | 2.934736      | 2.934736      | 2.934736      | 3.025829      | 3.025829      | 3.025829      | 2.934736      | 2.890214      | 2.832436      | 2.890214      | 2.7579        |
| OCUG-1             | 3.08614       | 3.08614       | 3.08614       | 3.104705      | 3.08614       | 2.981715      | 2.885473      | 2.885473      | 2.836887      | 2.885473      | 2.836887      |
| NL20-TA            | 3.008478      | 2.960892      | 2.960892      | 3.008478      | 3.008478      | 3.044443      | 3.008478      | 3.008478      | 3.050063      | 3.226394      | 3.226394      |
| KYSE-70            | 2.982228      | 2.982228      | 2.895285      | 2.855137      | 2.895285      | 2.855137      | 2.788359      | 2.855137      | 2.895285      | 2.920657      | 2.855137      |
| MOG-G-UVW          | 2.865042      | 2.808771      | 2.77446       | 2.77446       | 2.77446       | 2.808771      | 2.808771      | 2.808771      | 2.890246      | 3.032303      | 2.890246      |
| NCI-H2342          | 2.797719      | 2.797719      | 2.748554      | 2.913392      | 2.985368      | 2.913392      | 2.86797       | 2.913392      | 2.985368      | 3.114487      | 3.114487      |

| ProbeSetID         | SNP_A-1989993 | SNP_A-2075433 | SNP_A-1867443 | SNP_A-2145133 | SNP_A-2236083 | SNP_A-2196993 | SNP_A-1989999 | SNP_A-2212413 | SNP_A-1958323 | SNP_A-2024853 | SNP_A-1959703 |
|--------------------|---------------|---------------|---------------|---------------|---------------|---------------|---------------|---------------|---------------|---------------|---------------|
| Affy_SNP.ID        | 2569010       | 6293987       | 11350852      | 7356959       | 8796070       | 8136360       | 2569034       | 8389173       | 12670418      | 5521926       | 12690481      |
| dbSNP              | rs2110290     | rs12671550    | rs7803660     | rs7796139     | rs980653      | rs13244925    | rs10488142    | rs17172446    | rs6947594     | rs12666347    | rs17172448    |
| Chromosome         | 7             | 7             | 7             | 7             | 7             | 7             | 7             | 7             | 7             | 7             | 7             |
| Position           | 54946977      | 54947884      | 54948280      | 54950085      | 54960099      | 54966465      | 54970156      | 54976807      | 54977506      | 54980139      | 54981429      |
| Strand             | -             | +             | +             | +             | +             | +             | -             | +             | +             | +             | +             |
| Cytoband           | p11.2         |
| ABC-1              | 2.712288      | 2.501923      | 2.712288      | 2.501923      | 2.501923      | 2.501923      | 2.501923      | 2.585563      | 2.929337      | 3.12143       | 2.929337      |
| NCI-H650           | 2.858761      | 2.858761      | 2.819032      | 3.033231      | 3.033231      | 3.108333      | 3.108333      | 3.108333      | 3.108333      | 3.15666       | 3.108333      |
| FTC 133            | 2.854504      | 2.854504      | 2.854504      | 2.854504      | 2.930674      | 2.930674      | 2.930674      | 2.930674      | 2.901161      | 2.930674      | 3.037151      |
| MDST8              | 2.901552      | 2.901552      | 2.901552      | 2.891538      | 2.891538      | 2.891538      | 2.891538      | 2.891538      | 2.891538      | 2.891538      | 2.891538      |
| KYSE-150           | 2.699953      | 2.820802      | 2.853313      | 2.853313      | 2.976979      | 2.853313      | 2.830263      | 2.853313      | 2.976979      | 3.058522      | 2.976979      |
| SW 48              | 2.67929       | 2.67929       | 2.718244      | 2.718244      | 2.718244      | 2.773247      | 2.773247      | 2.785657      | 3.015924      | 3.064594      | 3.064594      |
| NCI-H2023          | 2.849425      | 2.660853      | 2.660853      | 2.662482      | 2.662482      | 2.662482      | 2.662482      | 2.894005      | 2.981808      | 2.99363       | 2.99363       |
| COLO-680N          | 2.881362      | 2.881362      | 2.846328      | 2.824089      | 2.824089      | 2.846328      | 2.846328      | 2.846328      | 2.846328      | 2.846328      | 2.824089      |
| KP-4               | 2.8349        | 2.915294      | 2.915294      | 2.915294      | 3.017151      | 2.915294      | 2.881022      | 2.881022      | 2.881022      | 2.915294      | 2.881022      |
| SW-1710            | 2.828271      | 2.828271      | 2.828271      | 2.911509      | 2.945558      | 2.945558      | 2.945558      | 2.945558      | 2.945558      | 2.945558      | 2.911509      |
| KATO III           | 2.976341      | 2.969411      | 2.969411      | 2.976341      | 3.047355      | 2.976341      | 2.969411      | 2.969411      | 2.976341      | 2.976341      | 2.969411      |
| RERF-GC-1B         | 2.646094      | 2.646094      | 2.864561      | 2.864561      | 2.905275      | 2.864561      | 2.798813      | 2.798813      | 2.812758      | 2.864561      | 2.812758      |
| CAL-29             | 2.811331      | 2.905222      | 2.905222      | 2.905222      | 2.834447      | 3.048188      | 2.834447      | 2.834447      | 2.834447      | 2.778671      | 2.834447      |
| Sci-1              | 2.727654      | 2.525828      | 2.525828      | 2.702691      | 2.816032      | 2.816032      | 2.702691      | 2.816032      | 2.816032      | 2.936228      | 2.936228      |
| NCI-H810           | 2.800201      | 2.800201      | 2.800201      | 2.800201      | 2.800201      | 2.866635      | 2.866635      | 2.870222      | 2.870222      | 2.887754      | 2.958016      |
| T.Tn               | 2.648515      | 2.648515      | 2.648515      | 2.648515      | 2.834522      | 2.826181      | 2.826181      | 2.826181      | 2.826181      | 2.871151      | 2.871151      |
| DOK                | 2.86147       | 2.849264      | 2.849264      | 2.849264      | 2.755414      | 2.755414      | 2.755414      | 2.755414      | 2.86147       | 2.862593      | 2.912571      |
| COLO 741           | 2.808684      | 2.808684      | 2.735782      | 2.6317        | 2.6317        | 2.6317        | 2.6317        | 2.654984      | 2.654984      | 2.735782      | 2.654984      |
| NCI-H1651          | 2.732046      | 2.732046      | 2.732046      | 2.814292      | 2.814292      | 2.787206      | 2.642702      | 2.787206      | 2.787425      | 2.814292      | 2.787425      |
| RWPE-1             | 2.766043      | 2.766043      | 2.766043      | 2.766043      | 2.766043      | 2.708904      | 2.708904      | 2.708904      | 2.768763      | 2.781853      | 2.768763      |
| KYSE-270           | 2.641385      | 2.762888      | 2.808357      | 2.934997      | 2.994284      | 2.934997      | 2.808357      | 2.808357      | 2.934997      | 2.934997      | 2.905929      |
| NCI-H196           | 2.736006      | 2.729414      | 2.736006      | 2.787766      | 2.875531      | 2.736006      | 2.729414      | 2.855963      | 2.875531      | 3.047636      | 2.875531      |
| SK-LU-1            | 2.766452      | 2.766452      | 2.741065      | 2.64471       | 2.64471       | 2.64471       | 2.64471       | 2.741065      | 2.741065      | 2.84104       | 2.84104       |
| NCI-H1693 (ship16) | 2.490456      | 2.480372      | 2.480372      | 2.480372      | 2.490456      | 2.490456      | 2.480372      | 2.625598      | 2.625598      | 2.757767      | 2.775541      |
| NCI-H2135          | 2.739424      | 2.683915      | 2.683915      | 2.683915      | 2.683915      | 2.683915      | 2.683915      | 2.739424      | 2.807975      | 2.810307      | 2.810307      |
| VMRC-RCW           | 2.70904       | 2.70904       | 2.70904       | 2.70904       | 2.70904       | 2.732449      | 2.5876        | 2.846339      | 2.846339      | 2.897305      | 2.846339      |
| RERF-LC-Sq1        | 2.732214      | 2.664625      | 2.664625      | 2.664625      | 2.664625      | 2.631295      | 2.588083      | 2.664625      | 2.664625      | 2.664625      | 2.67573       |
| A375.S2            | 2.640507      | 2.640507      | 2.640507      | 2.732202      | 2.89428       | 2.732202      | 2.732202      | 2.89428       | 2.963817      | 3.04182       | 3.04182       |
| SW 1116            | 2.578677      | 2.578677      | 2.465444      | 2.495928      | 2.578677      | 2.578677      | 2.578677      | 2.636934      | 2.682628      | 2.728136      | 2.910699      |
| CAL-148            | 2.728069      | 2.728069      | 2.590999      | 2.728069      | 2.728069      | 2.728069      | 2.640091      | 2.728069      | 2.922303      | 2.948374      | 2.948374      |
| 22RV1              | 2.570591      | 2.570591      | 2.570591      | 2.570591      | 2.680441      | 2.680441      | 2.680441      | 2.788216      | 2.859307      | 2.859307      | 2.788216      |
| IM-95              | 2.726768      | 2.71284       | 2.71284       | 2.548464      | 2.548464      | 2.470988      | 2.467064      | 2.470988      | 2.470988      | 2.564571      | 2.720706      |
| HT 115             | 2.752992      | 2.752992      | 2.752992      | 2.783217      | 2.752992      | 2.606907      | 2.752992      | 2.888136      | 2.888136      | 2.894883      | 2.888136      |
| NCI-H727           | 2.721212      | 2.688134      | 2.636206      | 2.688134      | 2.768608      | 2.688134      | 2.688134      | 2.768608      | 2.808128      | 2.808128      | 2.808128      |
| T.T                | 2.765135      | 2.724491      | 2.616559      | 2.616559      | 2.724491      | 2.646752      | 2.616559      | 2.616559      | 2.646752      | 2.724491      | 2.646752      |
| OE33               | 2.71355       | 2.813356      | 2.813356      | 2.974191      | 2.813356      | 2.974191      | 2.974191      | 2.813356      | 2.927695      | 2.927695      | 2.927695      |
| PLC/PRF/5          | 2.791804      | 2.791804      | 2.780598      | 2.791804      | 2.791804      | 2.791804      | 2.780598      | 2.723031      | 2.780598      | 2.834663      | 2.723031      |
| SAS                | 2.770354      | 2.770354      | 2.730892      | 2.730892      | 2.706455      | 2.867372      | 2.640114      | 2.640114      | 2.563539      | 2.640114      | 2.550694      |
| MKN74              | 2.71947       | 2.638692      | 2.638692      | 2.638692      | 2.734463      | 2.638692      | 2.624157      | 2.624157      | 2.638692      | 2.734463      | 2.734463      |
| HMCB               | 2.810558      | 2.810558      | 2.810558      | 2.837513      | 2.810558      | 2.810558      | 2.703291      | 2.703291      | 2.703291      | 3.046953      | 3.046953      |
| A2058              | 2.802048      | 2.926732      | 2.926732      | 2.931113      | 2.931113      | 2.926732      | 2.689237      | 2.689237      | 2.6922        | 2.861331      | 2.6922        |
| HCC-366            | 2.676061      | 2.673229      | 2.501184      | 2.673229      | 2.501184      | 2.501184      | 2.450513      | 2.673229      | 2.673229      | 2.760617      | 2.34381       |
| P31/FUJ            | 2.672578      | 2.672578      | 2.672578      | 2.672578      | 2.672578      | 2.672578      | 2.447636      | 2.544966      | 2.523266      | 2.544966      | 2.523266      |
| SW 1417            | 2.709818      | 2.706353      | 2.667168      | 2.667168      | 2.667168      | 2.665496      | 2.53452       | 2.665496      | 2.672327      | 2.672327      | 2.672327      |
| KMRC-1             | 2.703912      | 2.703912      | 2.703912      | 2.982526      | 2.982526      | 2.982526      | 2.685098      | 2.685098      | 2.685098      | 2.818901      | 2.685098      |
| OAW42              | 2.639675      | 2.639675      | 2.639675      | 2.548929      | 2.684119      | 2.664958      | 2.539072      | 2.664958      | 2.664958      | 2.684119      | 2.684119      |
| PE/CA-PJ15         | 2.602075      | 2.618352      | 2.618352      | 2.750212      | 2.750235      | 2.750235      | 2.750212      | 2.750235      | 2.773809      | 2.989917      | 2.989917      |

| ProbeSetID   | SNP_A-1989993 | SNP_A-2075433 | SNP_A-1867443 | SNP_A-2145133 | SNP_A-2236083 | SNP_A-2196993 | SNP_A-1989993 | SNP_A-2212413 | SNP_A-1958323 | SNP_A-2024853 | SNP_A-1959703 |
|--------------|---------------|---------------|---------------|---------------|---------------|---------------|---------------|---------------|---------------|---------------|---------------|
| Affy_SNP.ID  | 2569010       | 6293987       | 11350852      | 7356959       | 8796070       | 8136360       | 2569034       | 8389173       | 12670418      | 5521926       | 12690481      |
| dbSNP        | rs2110290     | rs12671550    | rs7803660     | rs7796139     | rs980653      | rs13244925    | rs10488142    | rs17172446    | rs6947594     | rs12666347    | rs17172448    |
| Chromosome   | 7             | 7             | 7             | 7             | 7             | 7             | 7             | 7             | 7             | 7             | 7             |
| Position     | 54946977      | 54947884      | 54948280      | 54950085      | 54960099      | 54966465      | 54970156      | 54976807      | 54977506      | 54980139      | 54981429      |
| Strand       | -             | +             | +             | +             | +             | +             | -             | +             | +             | +             | +             |
| Cytoband     | p11.2         |
| NUGC-3       | 2.520268      | 2.520268      | 2.658408      | 2.658408      | 2.784162      | 2.658408      | 2.358704      | 2.358704      | 2.658408      | 2.784162      | 2.784162      |
| DMS 273      | 2.651855      | 2.596038      | 2.479432      | 2.596038      | 2.479432      | 2.432525      | 2.410622      | 2.410622      | 2.432525      | 2.803818      | 2.432525      |
| MKN1         | 2.642413      | 2.642413      | 2.650727      | 2.628987      | 2.628987      | 2.628987      | 2.536078      | 2.536078      | 2.628987      | 2.650727      | 2.650727      |
| RERF-LC-Ad2  | 2.554791      | 2.503269      | 2.503269      | 2.503269      | 2.554791      | 2.554791      | 2.503269      | 2.609326      | 2.503269      | 2.609326      | 2.634979      |
| TASK1        | 2.655076      | 2.772209      | 2.772209      | 2.917509      | 2.772209      | 2.917509      | 2.772209      | 2.772209      | 2.647455      | 2.920521      | 2.569751      |
| NCI-H23      | 2.590847      | 2.590847      | 2.590847      | 2.773534      | 2.784261      | 2.808346      | 2.773534      | 2.773534      | 2.787623      | 2.787623      | 2.787623      |
| KP-1N        | 2.623518      | 2.623518      | 2.623518      | 2.623518      | 2.623518      | 2.643498      | 2.623518      | 2.623518      | 2.584539      | 2.643498      | 2.271359      |
| NCI-H711     | 2.622425      | 2.622425      | 2.622425      | 2.695184      | 2.740764      | 2.695184      | 2.622425      | 2.622425      | 2.695184      | 2.695184      | 2.695184      |
| NCI-H661     | 2.621297      | 2.642402      | 2.583113      | 2.583113      | 2.583113      | 2.585352      | 2.585352      | 2.585352      | 2.647144      | 2.669251      | 2.669251      |
| EBC-1        | 2.62068       | 2.403268      | 2.378068      | 2.378068      | 2.42825       | 2.248656      | 2.181707      | 2.248656      | 2.42825       | 2.573762      | 2.573762      |
| JHH-6        | 2.779299      | 2.616256      | 2.616256      | 2.779299      | 2.779299      | 2.76178       | 2.642355      | 2.642355      | 2.642355      | 2.76178       | 2.642355      |
| NB69         | 2.699919      | 2.699919      | 2.689168      | 2.689168      | 2.771381      | 2.771381      | 2.771381      | 2.771381      | 2.908541      | 2.931249      | 2.931249      |
| SR           | 2.66083       | 2.584221      | 2.584221      | 2.607445      | 2.584221      | 2.539168      | 2.539168      | 2.584221      | 2.584221      | 2.607445      | 2.539168      |
| T84          | 2.888762      | 2.631886      | 2.571408      | 2.571408      | 2.57326       | 2.571408      | 2.571408      | 2.57326       | 2.491003      | 2.491003      | 2.428822      |
| HO-1-N-1     | 2.803468      | 2.803468      | 2.803468      | 2.803468      | 2.77179       | 2.742058      | 2.643568      | 2.643568      | 2.563124      | 2.643568      | 2.563124      |
| BALL-1       | 2.880693      | 2.530202      | 2.609933      | 2.609933      | 2.609933      | 2.609933      | 2.588918      | 2.588918      | 2.588918      | 2.609933      | 2.588918      |
| Nthy-ori 3-1 | 2.612139      | 2.612139      | 2.553458      | 2.553458      | 2.777624      | 2.777624      | 2.553458      | 2.553458      | 2.777624      | 2.803567      | 2.803567      |
| FTC 238      | 2.4464        | 2.610295      | 2.464597      | 2.610295      | 2.709581      | 2.709581      | 2.709581      | 2.709581      | 2.762467      | 2.803217      | 2.762467      |
| HuCCT1       | 2.700847      | 2.820899      | 2.820899      | 2.820899      | 2.820899      | 2.631828      | 2.595263      | 2.436273      | 2.436273      | 2.631828      | 2.436273      |
| HOS          | 2.52382       | 2.52382       | 2.461168      | 2.52382       | 2.591082      | 2.591082      | 2.591082      | 2.591082      | 2.688646      | 2.688646      | 2.662103      |
| NCI-H2170    | 2.450821      | 2.450821      | 2.450821      | 2.450821      | 2.653983      | 2.653983      | 2.653983      | 2.672121      | 2.760118      | 2.822158      | 2.760118      |
| Hs 936.T     | 2.318884      | 2.318884      | 2.376169      | 2.414761      | 2.477415      | 2.477415      | 2.477415      | 2.618352      | 2.662046      | 2.662046      | 2.662046      |
| NCI-H1793    | 2.526093      | 2.526093      | 2.450315      | 2.478588      | 2.526093      | 2.526093      | 2.526093      | 2.59349       | 2.686361      | 2.939439      | 2.686361      |
| MRK-nu-1     | 2.577449      | 2.577449      | 2.577449      | 2.577449      | 2.577449      | 2.492123      | 2.468905      | 2.492123      | 2.492123      | 2.692303      | 2.492123      |
| KHOS-312H    | 2.479847      | 2.479847      | 2.467813      | 2.443321      | 2.443321      | 2.443321      | 2.333239      | 2.584645      | 2.708284      | 2.746929      | 2.708284      |
| LCLC-103H    | 2.564998      | 2.543019      | 2.564998      | 2.564998      | 2.564998      | 2.543019      | 2.469591      | 2.543019      | 2.564998      | 2.615696      | 2.615696      |
| H69V         | 2.559905      | 2.512645      | 2.353756      | 2.512645      | 2.559905      | 2.559905      | 2.559905      | 2.512645      | 2.685656      | 3.005221      | 3.005221      |
| GCT          | 2.607164      | 2.57446       | 2.566172      | 2.566172      | 2.566172      | 2.566172      | 2.53827       | 2.566172      | 2.57446       | 2.619295      | 2.619295      |
| COLO 857     | 2.577945      | 2.561936      | 2.554101      | 2.554101      | 2.577945      | 2.554101      | 2.537048      | 2.537048      | 2.554101      | 2.592715      | 2.554101      |
| RERF-LC-MS   | 2.550014      | 2.514021      | 2.514021      | 2.465322      | 2.465322      | 2.42825       | 2.415786      | 2.42825       | 2.42825       | 2.62068       | 2.42825       |
| MKN7         | 2.42825       | 2.42825       | 2.42825       | 2.42825       | 2.42825       | 2.42825       | 2.378068      | 2.514021      | 2.514021      | 2.538066      | 2.538066      |
| A-427        | 2.534808      | 2.534808      | 2.534808      | 2.534808      | 2.558871      | 2.640033      | 2.640033      | 2.709017      | 2.640033      | 2.709017      | 2.640033      |
| T47D         | 2.510155      | 2.510155      | 2.510155      | 2.510155      | 2.510155      | 2.533249      | 2.533249      | 2.5755        | 2.5755        | 2.533249      | 2.503281      |
| BT-483       | 2.495977      | 2.495977      | 2.445374      | 2.445374      | 2.495977      | 2.495977      | 2.445374      | 2.590541      | 2.590541      | 2.590541      | 2.590541      |
| SKN          | 2.53615       | 2.53615       | 2.53615       | 2.53615       | 2.752747      | 2.521268      | 2.509067      | 2.509067      | 2.509067      | 2.521268      | 2.509067      |
| HCC202       | 2.368726      | 2.368726      | 2.368726      | 2.445856      | 2.445856      | 2.558586      | 2.558586      | 2.631492      | 2.558586      | 2.631492      | 2.658408      |
| OCUM-1       | 2.378068      | 2.378068      | 2.378068      | 2.378068      | 2.390695      | 2.378068      | 2.288093      | 2.378068      | 2.378068      | 2.501923      | 2.501923      |
| NCI-H2122    | 2.505158      | 2.505158      | 2.560499      | 2.560499      | 2.560499      | 2.560499      | 2.560499      | 2.6412        | 2.560499      | 2.54407       | 2.53476       |
| HT 29        | 2.728484      | 2.581439      | 2.477097      | 2.728484      | 2.45166       | 2.45166       | 2.522147      | 2.522147      | 2.522147      | 2.621641      | 2.522147      |
| huH-1        | 2.419942      | 2.480336      | 2.480336      | 2.908268      | 2.908268      | 2.908268      | 2.885229      | 2.885229      | 2.57843       | 2.885229      | 2.57843       |
| HCC-15       | 2.570994      | 2.570994      | 2.570994      | 2.570994      | 2.559477      | 2.341068      | 2.338426      | 2.338426      | 2.341068      | 2.559477      | 2.341068      |
| KHOS-240S    | 2.473022      | 2.473022      | 2.432761      | 2.432761      | 2.473022      | 2.568839      | 2.568839      | 2.568839      | 2.568839      | 2.568839      | 2.568839      |
| JIMT-1       | 2.512548      | 2.724536      | 2.724536      | 2.724536      | 2.756934      | 2.756934      | 2.724536      | 2.480543      | 2.558431      | 2.480543      | 2.480543      |
| KON          | 2.586717      | 2.332814      | 2.266351      | 2.586717      | 2.586717      | 2.586717      | 2.465788      | 2.465788      | 2.465788      | 2.628581      | 2.465788      |
| COLO 853     | 2.457194      | 2.457194      | 2.457194      | 2.444113      | 2.457194      | 2.457194      | 2.457194      | 2.457194      | 2.444113      | 2.444113      | 2.439805      |
| U-2 OS       | 2.453017      | 2.477574      | 2.514021      | 2.514021      | 2.477574      | 2.44066       | 2.44066       | 2.44066       | 2.514021      | 2.514021      | 2.477574      |
| ME-180       | 2.448612      | 2.448612      | 2.448612      | 2.506357      | 2.448612      | 2.663112      | 2.448612      | 2.448612      | 2.253708      | 2.663112      | 1.958807      |

| ProbeSetID  | SNP_A-1989993 | SNP_A-2075433 | SNP_A-1867443 | SNP_A-2145133 | SNP_A-2236083 | SNP_A-2196993 | SNP_A-1989993 | SNP_A-2212413 | SNP_A-1958323 | SNP_A-2024853 | SNP_A-1959703 |
|-------------|---------------|---------------|---------------|---------------|---------------|---------------|---------------|---------------|---------------|---------------|---------------|
| Affy_SNP.ID | 2569010       | 6293987       | 11350852      | 7356959       | 8796070       | 8136360       | 2569034       | 8389173       | 12670418      | 5521926       | 12690481      |
| dbSNP       | rs2110290     | rs12671550    | rs7803660     | rs7796139     | rs980653      | rs13244925    | rs10488142    | rs17172446    | rs6947594     | rs12666347    | rs17172448    |
| Chromosome  | 7             | 7             | 7             | 7             | 7             | 7             | 7             | 7             | 7             | 7             | 7             |
| Position    | 54946977      | 54947884      | 54948280      | 54950085      | 54960099      | 54966465      | 54970156      | 54976807      | 54977506      | 54980139      | 54981429      |
| Strand      | -             | +             | +             | +             | +             | +             | -             | +             | +             | +             | +             |
| Cytoband    | p11.2         |
| FU97        | 2.675708      | 2.697847      | 2.697847      | 2.710777      | 2.710777      | 2.710777      | 2.697847      | 2.585999      | 2.585999      | 2.710777      | 2.522135      |
| Calu-1      | 2.564903      | 2.564903      | 2.564903      | 2.568282      | 2.564903      | 2.436149      | 2.423993      | 2.436149      | 2.436149      | 2.573892      | 2.423993      |
| NCI-H2452   | 2.471895      | 2.427814      | 2.23931       | 2.427814      | 2.427814      | 2.427814      | 2.427814      | 2.427814      | 2.427814      | 2.427814      | 2.427814      |
| UMC-11      | 1.938157      | 1.938157      | 1.938157      | 1.938157      | 2.167067      | 2.261901      | 2.261901      | 2.416872      | 2.428859      | 2.489482      | 2.489482      |
| COLO 684    | 2.338093      | 2.317165      | 2.338093      | 2.371416      | 2.545086      | 2.545086      | 2.545086      | 2.545086      | 2.570994      | 2.752581      | 2.570994      |
| SVts-8      | 2.844466      | 2.7122876     | 2.7122876     | 2.4530171     | 2.4032677     | 2.2220626     | 2.1952216     | 1.3741214     | 0.9708537     | 0.9708537     | 0.9293365     |
| HEC-1       | 2.399539      | 2.399539      | 2.399539      | 2.399539      | 2.422174      | 2.422174      | 2.399539      | 2.354994      | 2.354994      | 2.399539      | 2.354994      |
| A-375       | 2.598911      | 2.608029      | 2.608029      | 2.608029      | 2.598911      | 2.598911      | 2.585045      | 2.585045      | 2.57368       | 2.57368       | 2.399791      |
| OUMS-23     | 2.611953      | 2.611953      | 2.611953      | 2.72614       | 2.72614       | 2.611953      | 2.382607      | 2.396737      | 2.396737      | 2.611953      | 2.396737      |
| EJ138       | 2.375953      | 2.375953      | 2.35813       | 2.375953      | 2.393516      | 2.393516      | 2.393516      | 2.393516      | 2.472704      | 2.472704      | 2.491661      |
| HO-1-u-1    | 2.443841      | 2.540448      | 2.540448      | 2.540448      | 2.540448      | 2.484412      | 2.403218      | 2.403218      | 2.403218      | 2.484412      | 2.403218      |
| HT55        | 2.460062      | 2.391842      | 2.349784      | 2.391842      | 2.460062      | 2.460062      | 2.460062      | 2.558527      | 2.564239      | 2.564239      | 2.564239      |
| NCI-H2347   | 2.249212      | 2.195815      | 2.195815      | 2.195815      | 2.195815      | 2.195815      | 2.195815      | 2.249212      | 2.347662      | 2.398333      | 2.398333      |
| REFR-LC-KJ  | 2.602707      | 2.488033      | 2.343964      | 2.343964      | 2.317643      | 2.317643      | 2.293402      | 2.317643      | 2.383365      | 2.535982      | 2.383365      |
| COR-L279    | 2.413361      | 2.366668      | 2.366668      | 2.366668      | 2.366668      | 2.364978      | 2.358844      | 2.358844      | 2.364978      | 2.364978      | 2.358844      |
| SW 1573     | 2.41606       | 2.427839      | 2.427839      | 2.438566      | 2.473034      | 2.566623      | 2.566623      | 2.566623      | 2.473034      | 2.566623      | 2.473034      |
| SW 900      | 2.486168      | 2.319439      | 2.319439      | 2.355734      | 2.355734      | 2.319439      | 2.315006      | 2.315006      | 2.355734      | 2.356754      | 2.355734      |
| HT 1376     | 2.477182      | 2.351215      | 2.351215      | 2.351215      | 2.351215      | 2.350538      | 2.313635      | 2.226974      | 2.313635      | 2.350538      | 2.313635      |
| HUP-T3      | 2.464892      | 2.464892      | 2.464892      | 2.71578       | 2.71578       | 2.732807      | 2.732807      | 2.732807      | 2.212563      | 2.732807      | 2.212563      |
| STC 1       | 2.356945      | 2.34628       | 2.34628       | 2.34628       | 2.34628       | 2.34628       | 2.163252      | 2.34628       | 2.390632      | 2.401071      | 2.401071      |
| NCI-H2286   | 2.341299      | 2.352007      | 2.352007      | 2.179945      | 2.179945      | 2.179945      | 2.179945      | 2.352007      | 2.500298      | 2.500298      | 2.500298      |
| VMRC-LCD    | 2.33985       | 2.33985       | 2.301119      | 2.261862      | 2.301119      | 2.288093      | 2.261862      | 2.261862      | 2.288093      | 2.301119      | 2.288093      |
| H69AR       | 2.065076      | 1.994946      | 1.994946      | 1.994946      | 2.02478       | 2.02478       | 1.912842      | 2.02478       | 2.065076      | 2.338336      | 2.547151      |
| VMRC-LCP    | 2.33487       | 2.33487       | 2.238646      | 2.33487       | 2.33487       | 2.33487       | 2.238646      | 2.33487       | 2.33487       | 2.554327      | 2.091864      |
| FLYA13      | 2.274574      | 2.274574      | 2.274574      | 2.274574      | 2.275807      | 2.275807      | 2.275807      | 2.275807      | 2.321944      | 2.405061      | 2.405061      |
| HUP-T4      | 2.421351      | 2.554518      | 2.554518      | 2.554518      | 2.405312      | 2.554518      | 2.405312      | 2.405312      | 2.40023       | 2.405312      | 2.390153      |
| COR-L 105   | 2.315278      | 2.226814      | 2.190769      | 2.175252      | 2.190769      | 2.190769      | 2.172331      | 2.172331      | 2.226814      | 2.307818      | 2.307818      |
| KMRC-20     | 2.43173       | 2.43173       | 2.43173       | 2.480702      | 2.480702      | 2.43173       | 2.323259      | 2.30787       | 2.214398      | 2.30787       | 2.214398      |
| NCI-H2081   | 2.295681      | 2.295681      | 2.295681      | 2.295681      | 2.179945      | 2.160811      | 2.125432      | 2.160811      | 2.179945      | 2.400218      | 2.400218      |
| VM-CUB1     | 2.374383      | 2.320149      | 2.175292      | 2.293832      | 2.427964      | 2.427964      | 2.427964      | 2.293832      | 2.293832      | 2.427964      | 2.293832      |
| BU25 TK     | 2.23834       | 2.23834       | 2.23834       | 2.302796      | 2.302796      | 2.312055      | 2.312055      | 2.312055      | 2.312055      | 2.345205      | 2.345205      |
| RCM-1       | 2.287897      | 2.287897      | 2.146105      | 2.146105      | 2.146105      | 2.393843      | 2.146105      | 2.146105      | 2.393843      | 2.416048      | 2.393843      |
| NCI-H2172   | 2.262178      | 2.341145      | 2.423931      | 2.423931      | 2.423931      | 2.374763      | 2.341145      | 2.374763      | 2.374763      | 2.474381      | 2.374763      |
| SK-NEP-1    | 2.450525      | 2.450525      | 2.450525      | 2.580813      | 2.580813      | 2.561758      | 2.561758      | 2.561758      | 2.54419       | 2.561758      | 2.54419       |
| D1.1        | 2.124299      | 2.124299      | 2.114554      | 2.124299      | 2.366592      | 2.366592      | 2.480714      | 2.366592      | 2.366592      | 2.480714      | 2.366592      |
| NCI-H2196   | 2.280615      | 2.35799       | 2.35799       | 2.35799       | 2.362307      | 2.362307      | 2.35799       | 2.35799       | 2.356448      | 2.356448      | 2.356448      |
| NCI-H1435   | 2.276947      | 2.276947      | 2.276856      | 2.276947      | 2.276947      | 2.364825      | 2.364825      | 2.364825      | 2.364825      | 2.364825      | 2.364825      |
| GRANTA-519  | 2.27561       | 2.31256       | 2.31256       | 2.398585      | 2.31256       | 2.394322      | 2.31256       | 2.31256       | 2.394322      | 2.398585      | 2.394322      |
| SK-MES      | 2.357519      | 2.271936      | 2.268061      | 2.271936      | 2.271936      | 2.271936      | 2.268061      | 2.23402       | 2.252717      | 2.268061      | 2.252717      |
| NCI-H1437   | 2.39072       | 2.304795      | 2.304795      | 2.39072       | 2.39072       | 2.519136      | 2.519136      | 2.519136      | 2.519136      | 2.519136      | 2.110822      |
| BFTC-905    | 2.350002      | 2.518364      | 2.518364      | 2.565508      | 2.565508      | 2.565508      | 2.306314      | 2.283193      | 2.266746      | 2.266746      | 2.13069       |
| DMS 153     | 2.03882       | 2.313078      | 2.313078      | 1.964421      | 1.964421      | 1.964421      | 1.964076      | 2.09869       | 2.058934      | 2.09869       | 2.124008      |
| Detroit 562 | 2.376818      | 2.277328      | 2.277328      | 2.277328      | 2.376818      | 2.277328      | 2.277328      | 2.261335      | 2.277328      | 2.281858      | 2.277328      |
| RT4         | 2.338118      | 2.246948      | 2.145117      | 2.145117      | 2.246948      | 2.246948      | 2.150764      | 2.145117      | 2.150764      | 2.246948      | 2.150764      |
| 273T        | 2.241686      | 2.241686      | 2.241686      | 2.324033      | 2.440846      | 2.324033      | 2.224973      | 2.224973      | 2.42958       | 2.440846      | 2.440846      |
| SW 1463     | 2.329058      | 2.238128      | 2.238128      | 2.051985      | 2.051985      | 2.051985      | 2.011619      | 2.051985      | 2.051985      | 2.283101      | 2.219791      |
| H69         | 2.382633      | 2.503874      | 2.503874      | 2.503874      | 2.503874      | 2.574401      | 2.503874      | 2.361951      | 2.361951      | 2.361951      | 2.282643      |

| ProbeSetID      | SNP_A-1989993 | SNP_A-2075433 | SNP_A-1867443 | SNP_A-2145133 | SNP_A-2236083 | SNP_A-2196993 | SNP_A-1989999 | SNP_A-2212413 | SNP_A-1958323 | SNP_A-2024853 | SNP_A-1959703 |
|-----------------|---------------|---------------|---------------|---------------|---------------|---------------|---------------|---------------|---------------|---------------|---------------|
| Affy_SNP.ID     | 2569010       | 6293987       | 11350852      | 7356959       | 8796070       | 8136360       | 2569034       | 8389173       | 12670418      | 5521926       | 12690481      |
| dbSNP           | rs2110290     | rs12671550    | rs7803660     | rs7796139     | rs980653      | rs13244925    | rs10488142    | rs17172446    | rs6947594     | rs12666347    | rs17172448    |
| Chromosome      | 7             | 7             | 7             | 7             | 7             | 7             | 7             | 7             | 7             | 7             | 7             |
| Position        | 54946977      | 54947884      | 54948280      | 54950085      | 54960099      | 54966465      | 54970156      | 54976807      | 54977506      | 54980139      | 54981429      |
| Strand          | -             | +             | +             | +             | +             | +             | -             | +             | +             | +             | +             |
| Cytoband        | p11.2         |
| Hs 195.T        | 2.37101       | 2.272173      | 2.272173      | 2.272173      | 2.272173      | 2.272173      | 2.249688      | 2.167012      | 2.167012      | 2.167012      | 1.957812      |
| NCI-H1781       | 2.103329      | 2.041495      | 2.041495      | 2.041495      | 2.103329      | 1.947458      | 1.922921      | 1.947458      | 2.090858      | 2.160961      | 2.249503      |
| WIDR            | 2.229947      | 2.229947      | 2.229947      | 2.136172      | 2.229947      | 2.136172      | 2.136172      | 2.136172      | 2.145378      | 2.148888      | 2.145378      |
| SK-MEL-1        | 2.049902      | 2.049902      | 2.049902      | 2.050497      | 2.057845      | 2.057845      | 2.057845      | 2.077841      | 2.214036      | 2.214036      | 2.25162       |
| SUIT-2          | 2.153378      | 2.153378      | 2.153378      | 2.153378      | 2.153378      | 2.323079      | 2.142248      | 2.323079      | 2.34995       | 2.35799       | 2.34995       |
| WPE1-NB26       | 2.273459      | 2.273459      | 2.273459      | 2.144019      | 2.396448      | 2.144019      | 2.104707      | 1.954838      | 2.144019      | 2.25774       | 2.144019      |
| HCC-78          | 2.47794       | 2.408832      | 2.244404      | 2.244404      | 2.244404      | 2.23273       | 2.146105      | 2.117118      | 2.146105      | 2.146105      | 2.117118      |
| A549            | 2.313712      | 2.201767      | 2.297192      | 2.297192      | 2.313712      | 2.313712      | 2.297192      | 2.297192      | 2.313712      | 2.316894      | 2.316894      |
| LK-2            | 2.298519      | 2.321415      | 2.308985      | 2.308985      | 2.308985      | 2.308985      | 2.274391      | 2.260926      | 2.260926      | 2.308985      | 2.260926      |
| NCI-H2330       | 2.198132      | 2.031038      | 2.00408       | 2.00408       | 2.031038      | 2.031038      | 2.059824      | 1.994122      | 2.059824      | 2.223799      | 2.059824      |
| COLO 685        | 2.07098       | 1.798351      | 2.07098       | 2.07098       | 2.08013       | 2.08013       | 2.08013       | 2.197742      | 2.342926      | 2.417621      | 2.342926      |
| BICR22          | 2.086451      | 2.108224      | 2.086451      | 2.086451      | 2.086451      | 2.108224      | 2.127751      | 2.127751      | 2.127751      | 2.382645      | 2.355632      |
| MEWO            | 2.298337      | 2.19278       | 2.133804      | 2.133804      | 2.143978      | 2.19278       | 2.143978      | 2.19278       | 2.198496      | 2.198496      | 2.198496      |
| IHH-4           | 2.301691      | 2.301691      | 2.301691      | 2.301691      | 2.190917      | 2.190917      | 2.164669      | 2.08407       | 2.164669      | 2.164669      | 2.08407       |
| NCI-N87         | 2.192578      | 2.180447      | 2.180447      | 2.180447      | 2.180447      | 2.063172      | 2.063172      | 2.063172      | 2.063172      | 2.180447      | 2.180447      |
| KYSE-410        | 2.176907      | 2.176907      | 2.176907      | 2.176975      | 2.216206      | 2.176975      | 2.176907      | 2.175075      | 2.176975      | 2.247584      | 2.247584      |
| DMS 92          | 2.224373      | 2.224373      | 2.133391      | 2.206378      | 2.206378      | 2.224373      | 2.206378      | 2.138524      | 2.138524      | 2.138524      | 2.138524      |
| RO82-W-1        | 2.175428      | 2.174926      | 2.127834      | 2.127834      | 2.127834      | 2.127834      | 2.127834      | 2.174926      | 2.174926      | 2.174926      | 2.127834      |
| NCI-H82         | 2.173975      | 2.150066      | 2.173975      | 2.2636        | 2.372316      | 2.372316      | 2.372316      | 2.294522      | 2.372316      | 2.407643      | 2.407643      |
| C32             | 2.202224      | 2.183697      | 2.183697      | 2.202224      | 2.212563      | 2.212563      | 2.202224      | 2.183697      | 2.258698      | 2.374395      | 2.258698      |
| Hs 633T         | 2.255636      | 2.203408      | 1.983289      | 2.063383      | 2.063383      | 2.159405      | 2.159405      | 2.159405      | 2.255636      | 2.321143      | 2.159405      |
| NCI-H2405       | 2.132537      | 2.132537      | 2.071515      | 2.132537      | 2.167026      | 2.219697      | 2.219697      | 2.369665      | 2.369665      | 2.369665      | 2.369665      |
| Hs 895.T        | 2.188107      | 2.188107      | 2.188107      | 2.114277      | 2.188107      | 2.034476      | 1.995987      | 2.034476      | 2.207586      | 2.058708      | 2.283075      |
| MG 63           | 2.269874      | 2.234007      | 2.045701      | 2.10312       | 2.10312       | 2.234007      | 2.34232       | 2.234007      | 2.234007      | 2.234007      | 2.141685      |
| CAL-120         | 2.299286      | 2.299286      | 2.299286      | 2.299286      | 1.917448      | 2.299286      | 2.215001      | 1.917448      | 1.917448      | 1.917448      | 1.781158      |
| H33HJ-JA1       | 2.297556      | 2.288041      | 2.133418      | 2.133418      | 2.133418      | 2.133418      | 2.092633      | 2.092633      | 2.092633      | 2.092633      | 1.788557      |
| JSC-1           | 2.126771      | 2.126771      | 2.021989      | 2.021989      | 2.126771      | 2.144829      | 2.365105      | 2.144829      | 2.144829      | 2.365105      | 2.144829      |
| Hs 751.T        | 1.934809      | 1.888652      | 1.888652      | 1.888652      | 1.970651      | 1.801737      | 1.800563      | 1.970651      | 2.140559      | 2.146283      | 2.248312      |
| HMVII           | 2.208579      | 1.891964      | 1.712521      | 1.891964      | 2.1288        | 2.1288        | 1.891964      | 1.891964      | 2.1288        | 2.132688      | 2.132688      |
| fR2             | 2.129366      | 2.099889      | 2.124962      | 2.124962      | 2.124962      | 2.124962      | 2.124962      | 2.088229      | 2.124962      | 2.130276      | 2.130276      |
| COLO 201        | 2.124672      | 2.124672      | 2.131379      | 2.131379      | 2.131379      | 2.059443      | 2.059443      | 2.03021       | 2.080649      | 2.131379      | 2.080649      |
| NCI-H1915       | 2.315006      | 2.203058      | 2.119292      | 2.119292      | 2.119292      | 2.119292      | 2.032821      | 1.986407      | 2.032821      | 2.119292      | 1.986407      |
| IMR-90          | 2.290298      | 2.268442      | 2.268442      | 2.268442      | 2.268442      | 2.268442      | 2.091613      | 2.055101      | 2.055101      | 2.117312      | 2.055101      |
| RT112/84        | 2.209988      | 2.111169      | 1.934426      | 1.934426      | 2.111169      | 2.004339      | 1.952082      | 1.952082      | 1.952082      | 2.004339      | 2.004339      |
| Hs 894(E).Lu    | 2.156427      | 2.156427      | 2.20283       | 2.210525      | 2.210525      | 2.20283       | 2.156427      | 2.105666      | 2.156427      | 2.156427      | 2.105666      |
| LNCAp clone FGC | 1.915933      | 1.915933      | 1.916809      | 1.956875      | 1.915933      | 1.956875      | 1.956875      | 1.962829      | 1.962829      | 1.962829      | 2.012495      |
| NCI-H1581       | 2.306897      | 2.163811      | 2.107682      | 2.27359       | 2.306897      | 2.27359       | 2.107682      | 2.107682      | 2.27359       | 2.27359       | 2.107682      |
| HCT 116         | 2.149107      | 2.149107      | 2.149107      | 2.149107      | 2.114623      | 2.114623      | 2.114623      | 2.106237      | 2.106237      | 2.106237      | 2.106237      |
| Hs 228.T        | 2.18635       | 2.112543      | 1.997041      | 1.997041      | 1.997041      | 1.997041      | 1.981619      | 1.981619      | 1.981619      | 2.017834      | 1.981619      |
| JURKAT EC-1     | 2.069755      | 2.069755      | 1.983941      | 2.125128      | 2.126757      | 2.127751      | 2.327384      | 2.126757      | 2.126757      | 2.252056      | 2.126757      |
| SK-N-BE(2)      | 2.209197      | 2.209197      | 1.974278      | 1.974278      | 2.113542      | 1.974278      | 1.952067      | 1.974278      | 1.999293      | 2.113542      | 1.999293      |
| LS180           | 2.205289      | 2.20404       | 2.130304      | 2.20404       | 2.20404       | 2.205289      | 2.153843      | 2.075285      | 2.153843      | 2.153843      | 2.153843      |
| CAL-51          | 2.23539       | 2.23539       | 2.172399      | 2.300066      | 2.300066      | 2.300066      | 2.172399      | 1.999697      | 2.172399      | 2.300066      | 1.999697      |
| SKG-IIIb        | 2.150476      | 2.150476      | 2.150476      | 2.150476      | 2.162816      | 2.254316      | 2.136695      | 2.136695      | 2.136695      | 2.243026      | 2.136695      |
| P116 T          | 2.194911      | 2.18612       | 2.084434      | 2.194911      | 2.084434      | 2.194911      | 2.084434      | 2.084434      | 2.084434      | 2.194911      | 2.084434      |
| Hs 417.Lu       | 2.235363      | 2.235363      | 2.036001      | 2.235363      | 2.235363      | 1.914507      | 1.870512      | 1.870512      | 2.235363      | 2.235363      | 1.870512      |
| WIL2 NS         | 2.000173      | 2.071417      | 2.071417      | 2.071417      | 2.071417      | 1.986581      | 1.986581      | 1.986581      | 2.071417      | 2.071417      | 2.096361      |



| ProbeSetID  | SNP_A-1989993 | SNP_A-2075433 | SNP_A-1867443 | SNP_A-2145133 | SNP_A-2236083 | SNP_A-2196993 | SNP_A-1989993 | SNP_A-2212413 | SNP_A-1958323 | SNP_A-2024853 | SNP_A-1959703 |
|-------------|---------------|---------------|---------------|---------------|---------------|---------------|---------------|---------------|---------------|---------------|---------------|
| Affy_SNP.ID | 2569010       | 6293987       | 11350852      | 7356959       | 8796070       | 8136360       | 2569034       | 8389173       | 12670418      | 5521926       | 12690481      |
| dbSNP       | rs2110290     | rs12671550    | rs7803660     | rs7796139     | rs980653      | rs13244925    | rs10488142    | rs17172446    | rs6947594     | rs12666347    | rs17172448    |
| Chromosome  | 7             | 7             | 7             | 7             | 7             | 7             | 7             | 7             | 7             | 7             | 7             |
| Position    | 54946977      | 54947884      | 54948280      | 54950085      | 54960099      | 54966465      | 54970156      | 54976807      | 54977506      | 54980139      | 54981429      |
| Strand      | -             | +             | +             | +             | +             | +             | -             | +             | +             | +             | +             |
| Cytoband    | p11.2         |
| COR-L95     | 2.202991      | 2.010944      | 1.924817      | 2.202991      | 2.202991      | 2.135856      | 2.088746      | 1.984406      | 2.088746      | 2.088746      | 2.081027      |
| SK-N-FI     | 2.08041       | 2.08041       | 1.993428      | 1.993428      | 1.993428      | 2.08041       | 1.984319      | 1.984319      | 2.050625      | 2.204429      | 2.204429      |
| WILCL       | 1.945738      | 1.911682      | 1.826326      | 1.826326      | 1.826326      | 1.826326      | 2.077982      | 2.077982      | 2.085765      | 2.143553      | 2.085765      |
| P32/ISH     | 2.107724      | 2.107724      | 2.107724      | 2.107724      | 2.102647      | 2.102647      | 2.061887      | 1.925379      | 1.925379      | 2.061887      | 1.925379      |
| EPLC-272H   | 2.069516      | 2.177911      | 1.857612      | 2.123843      | 2.123843      | 2.177911      | 2.123843      | 2.123843      | 2.053374      | 2.123843      | 2.053374      |
| A2780 ADR   | 2.108363      | 2.108363      | 2.108363      | 2.157028      | 2.157028      | 2.134438      | 2.134438      | 2.108363      | 2.108363      | 2.134438      | 2.134438      |
| C8166       | 1.978976      | 1.866828      | 1.962931      | 1.978976      | 2.062084      | 2.062084      | 2.062084      | 2.062084      | 2.206552      | 2.216808      | 2.206552      |
| Hs 908.T    | 2.048583      | 2.109377      | 2.109377      | 2.117617      | 2.183007      | 2.183007      | 2.117617      | 2.117617      | 2.183007      | 2.183007      | 2.265877      |
| NCI-H322    | 2.196327      | 2.14897       | 2.059372      | 2.010742      | 2.059372      | 2.059372      | 2.034404      | 2.034404      | 2.034404      | 2.059372      | 2.034404      |
| NCI-H1417   | 1.817518      | 1.474335      | 1.454848      | 1.454848      | 1.415368      | 1.415368      | 1.415368      | 1.415368      | 1.421703      | 1.421703      | 1.480059      |
| HBE4-E6/E7  | 2.451512      | 2.451512      | 2.451512      | 2.541596      | 2.451512      | 2.16919       | 2.058524      | 2.058524      | 2.058524      | 2.058524      | 1.829757      |
| NCI-H1522   | 1.989608      | 1.989608      | 2.078866      | 2.078866      | 2.180081      | 2.180081      | 2.180081      | 2.205948      | 2.301626      | 2.352045      | 2.301626      |
| LU99A       | 2.140779      | 2.028711      | 2.028711      | 2.028711      | 1.836772      | 1.836772      | 1.836772      | 1.836772      | 1.867145      | 1.941707      | 1.867145      |
| HCT-8       | 2.114263      | 2.135388      | 2.135388      | 2.234685      | 2.234685      | 2.340337      | 2.234685      | 2.114263      | 2.114263      | 1.881867      | 1.839107      |
| SBC-5       | 1.952654      | 1.952654      | 2.017031      | 2.15383       | 2.139377      | 2.017031      | 1.952654      | 2.017031      | 2.017031      | 2.078263      | 2.078263      |
| Ishikawa    | 2.202816      | 2.202816      | 2.202816      | 2.202816      | 2.208888      | 2.202816      | 2.04976       | 2.025609      | 2.025609      | 2.04976       | 2.025609      |
| U266B1      | 2.19363       | 2.19363       | 2.19363       | 2.17783       | 2.17783       | 2.17783       | 2.17783       | 2.045446      | 2.045446      | 2.17783       | 2.048909      |
| PA-TU-8988T | 2.048497      | 2.07933       | 2.07933       | 2.119375      | 2.119375      | 2.119375      | 2.07933       | 2.07933       | 2.07933       | 2.07933       | 2.074722      |
| HRT-18      | 2.134203      | 2.134203      | 1.931679      | 1.931679      | 1.950805      | 1.950805      | 1.950805      | 1.910551      | 1.950805      | 1.950805      | 1.950805      |
| C170        | 2.021331      | 2.047206      | 2.021331      | 2.047206      | 2.047206      | 2.248167      | 2.349899      | 2.248167      | 2.248167      | 2.137452      | 2.102535      |
| J GAMMA 1   | 2.031609      | 2.031609      | 1.982055      | 1.982055      | 1.982055      | 2.031609      | 2.031609      | 1.982055      | 1.982055      | 1.982055      | 1.905606      |
| LS174T      | 2.04259       | 2.04259       | 1.958778      | 1.994917      | 1.958778      | 1.994917      | 2.298961      | 1.994917      | 2.298961      | 2.315122      | 2.315122      |
| NCI-H526    | 2.049476      | 2.049476      | 2.034746      | 1.887858      | 1.884511      | 1.861944      | 1.861944      | 1.884511      | 1.884511      | 1.884511      | 1.884511      |
| HLE         | 1.951627      | 1.951627      | 1.951627      | 2.212603      | 2.226427      | 2.250257      | 2.226427      | 2.226427      | 2.226427      | 2.273892      | 2.226427      |
| 23132/87    | 2.014391      | 2.042959      | 2.042959      | 2.042959      | 2.042959      | 1.727877      | 1.727877      | 1.727877      | 1.836772      | 2.042959      | 1.836772      |
| Hs 834.T    | 2.012639      | 1.973812      | 1.973812      | 2.012639      | 2.162502      | 2.058637      | 2.012639      | 2.058637      | 2.162502      | 2.162502      | 2.058637      |
| Hs 891.T    | 2.076676      | 2.010326      | 2.010326      | 1.955966      | 1.955966      | 1.866118      | 1.800918      | 1.800918      | 1.866118      | 1.866118      | 1.866118      |
| Hs 839.T    | 2.049263      | 2.049263      | 1.913541      | 1.913541      | 1.913541      | 1.913541      | 1.770477      | 1.913541      | 1.913541      | 2.004872      | 1.913541      |
| SNU-1       | 2.004714      | 2.004714      | 2.004714      | 2.004714      | 2.004714      | 2.115649      | 2.004714      | 2.004714      | 2.004714      | 2.115649      | 2.115649      |
| EB1         | 2.000692      | 1.892354      | 1.864243      | 1.892354      | 1.892354      | 2.000692      | 1.892354      | 1.864243      | 1.892354      | 2.060559      | 1.864243      |
| NCI-H2009   | 2.040599      | 2.06207       | 2.06207       | 2.06207       | 2.065387      | 2.06207       | 1.988783      | 1.950189      | 1.950189      | 2.065387      | 1.950189      |
| NCI-H1048   | 1.8791        | 1.794357      | 2.045929      | 2.045929      | 1.831547      | 1.831547      | 1.629511      | 1.831547      | 1.897142      | 2.025137      | 2.025137      |
| A2780       | 2.075411      | 2.075411      | 2.075411      | 2.075411      | 2.075411      | 2.05694       | 2.075411      | 2.05694       | 2.05694       | 2.075411      | 2.05694       |
| NCI-H1666   | 2.042959      | 2.042959      | 2.042959      | 2.042959      | 2.042959      | 2.042959      | 2.042959      | 1.912113      | 1.61471       | 1.61471       | 1.61471       |
| G-402       | 2.130069      | 2.159159      | 2.159159      | 2.159159      | 2.159159      | 2.159159      | 2.14749       | 1.983289      | 1.983289      | 2.117464      | 1.894943      |
| JHH-7       | 2.010239      | 2.063736      | 2.063736      | 2.063736      | 1.981416      | 2.223278      | 1.981416      | 1.874568      | 1.874568      | 1.874568      | 1.845644      |
| OUS-11      | 1.942002      | 1.908661      | 1.942002      | 1.942002      | 1.880755      | 1.863502      | 1.863502      | 1.880755      | 1.880755      | 1.880755      | 2.049675      |
| AZ-521      | 2.051631      | 1.978932      | 1.967151      | 1.967151      | 2.051631      | 1.973972      | 1.803437      | 1.803437      | 1.803437      | 1.973972      | 2.033064      |
| K562/ADM    | 1.974715      | 1.974715      | 1.974715      | 1.974715      | 2.218628      | 2.000837      | 1.974715      | 1.783787      | 2.000837      | 2.049178      | 2.000837      |
| NCI-H889    | 2.143443      | 1.980051      | 1.974132      | 1.887648      | 1.974132      | 1.928723      | 1.800053      | 1.928723      | 1.928723      | 1.974132      | 1.942267      |
| OE19        | 1.971904      | 1.984565      | 1.989999      | 1.989999      | 1.989999      | 2.039902      | 2.059514      | 2.039902      | 2.039902      | 2.059514      | 2.059514      |
| HT 728.T    | 2.08243       | 2.023406      | 1.79076       | 1.79076       | 1.79076       | 1.900571      | 1.79076       | 1.79076       | 1.88089       | 1.88089       | 1.79076       |
| GA-10       | 2.283663      | 2.341363      | 2.341363      | 2.341363      | 2.283663      | 2.283663      | 2.283663      | 2.283663      | 1.949998      | 1.949998      | 1.929448      |
| Hs 737.T    | 1.948647      | 2.033763      | 1.961542      | 1.961542      | 1.934145      | 1.961542      | 2.14986       | 1.961542      | 1.962566      | 2.14986       | 2.099011      |
| NCI-H838    | 1.98355       | 1.965137      | 1.796138      | 1.965137      | 1.796138      | 1.796138      | 1.793009      | 1.796138      | 1.796138      | 1.962434      | 1.793009      |
| NCI-H1155   | 1.899458      | 2.198065      | 2.198065      | 2.198065      | 2.198065      | 2.198065      | 2.191255      | 2.008471      | 2.191255      | 2.191255      | 2.008471      |
| A2780cis    | 1.972181      | 1.994715      | 1.994715      | 1.994715      | 1.994715      | 1.994715      | 1.882814      | 1.881596      | 1.882814      | 1.994715      | 1.994715      |

| ProbeSetID                 | SNP_A-1989993 | SNP_A-2075433 | SNP_A-1867443 | SNP_A-2145133 | SNP_A-2236085 | SNP_A-2196993 | SNP_A-1989999 | SNP_A-2212413 | SNP_A-1958322 | SNP_A-2024856 | SNP_A-1959701 |
|----------------------------|---------------|---------------|---------------|---------------|---------------|---------------|---------------|---------------|---------------|---------------|---------------|
| Affy_SNP.ID                | 2569010       | 6293987       | 11350852      | 7356959       | 8796070       | 8136360       | 2569034       | 8389173       | 12670418      | 5521926       | 12690481      |
| dbSNP                      | rs2110290     | rs12671550    | rs7803660     | rs7796139     | rs980653      | rs13244925    | rs10488142    | rs17172446    | rs6947594     | rs12666347    | rs17172448    |
| Chromosome                 | 7             | 7             | 7             | 7             | 7             | 7             | 7             | 7             | 7             | 7             | 7             |
| Position                   | 54946977      | 54947884      | 54948280      | 54950085      | 54960099      | 54966465      | 54970156      | 54976807      | 54977506      | 54980139      | 54981429      |
| Strand                     | -             | +             | +             | +             | +             | +             | -             | +             | +             | +             | +             |
| Cytoband                   | p11.2         |
| G-401                      | 2.023163      | 2.071543      | 2.071543      | 2.071543      | 2.071543      | 2.085247      | 2.071543      | 1.856036      | 1.856036      | 1.856036      | 1.828823      |
| MS-1-L                     | 2.055186      | 2.197674      | 2.197674      | 2.197674      | 2.349171      | 2.197674      | 1.945518      | 1.945518      | 1.941045      | 1.945518      | 1.941045      |
| Hs 746T                    | 1.810763      | 1.810763      | 1.810763      | 1.830353      | 1.830353      | 1.932861      | 1.932861      | 2.066825      | 2.076971      | 2.138744      | 2.204873      |
| SW 13                      | 1.964757      | 1.791706      | 1.791706      | 1.964757      | 1.791706      | 1.791706      | 1.783196      | 1.783196      | 1.791706      | 2.076226      | 2.076226      |
| AGS                        | 2.031495      | 1.886192      | 1.83549       | 1.83549       | 1.83549       | 1.83549       | 1.685684      | 1.685684      | 1.83549       | 1.947164      | 1.947164      |
| NCI-H2171                  | 1.942958      | 1.890197      | 1.890197      | 1.825484      | 1.75585       | 1.713398      | 1.585294      | 1.713398      | 1.75585       | 1.825484      | 1.825484      |
| Hs 573.T                   | 1.930985      | 1.836788      | 1.836788      | 1.836788      | 1.860975      | 1.860975      | 1.930985      | 1.930985      | 1.930985      | 1.976402      | 1.860975      |
| HT1080                     | 2.162611      | 2.211557      | 2.211557      | 2.323814      | 2.211557      | 2.439496      | 2.439496      | 2.211557      | 2.211557      | 2.439496      | 2.439496      |
| COR-L 23/CPR               | 1.982795      | 2.276318      | 2.276318      | 2.276318      | 1.776189      | 2.186485      | 1.918754      | 1.918754      | 2.186485      | 2.186485      | 1.918754      |
| HGC-27                     | 2.035117      | 2.035117      | 1.875246      | 1.856612      | 2.031409      | 1.923706      | 1.785761      | 1.761355      | 1.785761      | 1.923706      | 1.785761      |
| SBC-3                      | 1.829007      | 1.804857      | 1.829007      | 1.804857      | 1.801166      | 1.739001      | 1.698077      | 1.698077      | 1.698077      | 1.801166      | 1.922283      |
| COLO 792                   | 1.915651      | 1.915651      | 1.879702      | 1.879702      | 1.915651      | 2.070093      | 2.070093      | 1.965297      | 1.965297      | 1.965297      | 1.965297      |
| H-EMC-SS                   | 2.145117      | 1.96664       | 1.96664       | 1.844365      | 1.823506      | 1.844365      | 1.823506      | 1.823506      | 1.823506      | 1.844365      | 1.844365      |
| J82                        | 1.910432      | 1.910432      | 1.910432      | 1.910432      | 1.965283      | 2.042519      | 1.965283      | 1.965283      | 1.965283      | 2.042519      | 1.965283      |
| Hs 600.T                   | 1.805151      | 1.805151      | 1.805151      | 1.805151      | 1.737958      | 1.905368      | 1.737958      | 1.905368      | 1.905368      | 2.002754      | 2.002754      |
| Hs 781.T                   | 1.904757      | 1.904757      | 1.873332      | 1.873332      | 1.836711      | 1.781843      | 1.780473      | 1.836711      | 1.933319      | 2.032679      | 2.032679      |
| BPH-1                      | 1.700079      | 1.700079      | 1.686698      | 1.700079      | 1.700079      | 1.700079      | 1.700079      | 1.795766      | 1.795766      | 2.167693      | 2.244272      |
| COR-L23                    | 1.914982      | 1.914982      | 1.914982      | 1.897919      | 1.826694      | 1.826694      | 1.774536      | 1.774536      | 1.774536      | 1.774536      | 1.774536      |
| A673                       | 2.074005      | 2.152585      | 2.152585      | 2.152585      | 2.074005      | 2.074005      | 2.074005      | 1.97335       | 2.074005      | 2.152585      | 1.865483      |
| COLO 205                   | 1.973113      | 1.899249      | 1.884661      | 1.884661      | 1.899249      | 1.899249      | 1.899249      | 1.884661      | 1.899249      | 2.025366      | 2.025366      |
| RMG-I                      | 2.090481      | 1.784191      | 1.761794      | 1.761794      | 2.256362      | 1.758486      | 1.737184      | 1.758486      | 2.040656      | 1.758486      | 1.758486      |
| WI-26 VA4                  | 1.854321      | 1.955937      | 1.854321      | 1.854321      | 1.854321      | 1.955937      | 1.854321      | 1.854321      | 1.854321      | 1.854321      | 1.783087      |
| Eos-HL-60                  | 1.891695      | 1.981823      | 1.853456      | 1.853456      | 1.796386      | 1.981823      | 1.796386      | 1.796386      | 1.796386      | 1.796386      | 1.796386      |
| GP5D                       | 1.689044      | 1.76123       | 1.76123       | 2.010958      | 2.010958      | 2.012151      | 2.012151      | 2.012151      | 2.010958      | 2.010958      | 2.021245      |
| MES-SA/Dx-5                | 1.996304      | 1.996304      | 1.992777      | 1.992777      | 1.893746      | 1.992777      | 1.893746      | 1.893746      | 1.893746      | 1.874252      | 1.893746      |
| SBC-2                      | 1.74312       | 1.583328      | 1.74312       | 1.814704      | 1.814704      | 1.663106      | 1.663106      | 1.814704      | 1.814704      | 1.953666      | 1.959275      |
| MCAS                       | 1.87627       | 1.880634      | 1.87627       | 1.87627       | 1.833045      | 1.880634      | 1.833045      | 1.833045      | 1.809916      | 1.833045      | 1.729192      |
| Ishikawa (Heraklio) 02 ER- | 1.899578      | 1.815412      | 1.677436      | 1.815412      | 2.155334      | 2.215523      | 2.15722       | 2.155334      | 2.155334      | 2.15722       | 2.155334      |
| MOLT-4F                    | 1.831195      | 1.831195      | 1.831195      | 1.831195      | 1.831195      | 1.831791      | 1.831195      | 1.831195      | 1.830904      | 1.830904      | 1.34409       |
| HARA                       | 1.770243      | 1.903146      | 1.903146      | 1.903146      | 1.681192      | 1.786491      | 1.681192      | 1.602715      | 1.681192      | 1.786491      | 1.681192      |
| NCI-H1944                  | 2.021961      | 2.112335      | 1.997416      | 1.997416      | 1.810579      | 1.997416      | 1.810579      | 1.810579      | 1.810579      | 1.810579      | 1.747863      |
| BICR 31                    | 1.819485      | 1.902564      | 1.902564      | 1.902564      | 1.902564      | 1.924535      | 1.924535      | 1.924535      | 1.924535      | 1.924535      | 1.784285      |
| D341 Med                   | 1.780333      | 1.780333      | 1.840297      | 1.864878      | 1.864878      | 1.864878      | 1.864878      | 1.846435      | 1.864878      | 1.864878      | 1.846435      |
| KHM-3S                     | 1.79781       | 1.79781       | 1.445684      | 1.420275      | 1.445684      | 1.445684      | 1.420275      | 1.37396       | 1.445684      | 1.79781       | 1.445684      |
| COR-L88                    | 1.653898      | 1.653898      | 1.622745      | 1.577822      | 1.577822      | 1.622745      | 1.622745      | 1.577822      | 1.622745      | 1.653898      | 1.653898      |
| NCI-H358                   | 1.843771      | 1.843771      | 1.707353      | 1.786631      | 1.843771      | 1.94415       | 1.843771      | 1.786631      | 1.831287      | 1.831287      | 1.831287      |
| 1321N                      | 2.011978      | 1.941531      | 1.941531      | 1.763408      | 1.763408      | 1.755253      | 1.755253      | 1.755253      | 1.763408      | 1.785668      | 1.763408      |
| KYSE-510                   | 1.671897      | 1.63672       | 1.671897      | 1.717203      | 1.744617      | 1.717203      | 1.671897      | 1.671897      | 1.717203      | 1.904876      | 1.904876      |
| TCO-1                      | 1.893866      | 1.954076      | 1.954076      | 1.954076      | 1.954076      | 2.115441      | 1.954076      | 1.831378      | 1.817073      | 1.817073      | 1.762546      |
| NCI-H441                   | 1.648591      | 1.648591      | 1.648591      | 1.68422       | 1.776251      | 1.776251      | 1.776251      | 1.776251      | 1.776251      | 1.844426      | 1.844426      |
| SNU-398                    | 1.669519      | 1.60187       | 1.327199      | 1.274998      | 1.327199      | 1.418246      | 1.418246      | 1.418246      | 1.528998      | 1.746808      | 1.656516      |
| NCI-H1299                  | 1.589006      | 1.589006      | 1.589006      | 1.589006      | 1.665326      | 1.665326      | 1.531765      | 1.504572      | 1.531765      | 1.665326      | 1.665326      |
| ASH-3                      | 1.456886      | 1.6048663     | 1.6048663     | 1.6675451     | 1.6675451     | 1.6675451     | 1.6048663     | 1.6048663     | 1.4974205     | 1.4974205     | 1.3502046     |
| MCF7                       | 1.356144      | 1.356144      | 1.264536      | 1.091937      | 1.150625      | 1.150625      | 1.150625      | 1.150625      | 1.150625      | 1.150625      | 1.150625      |
| SKOV3                      | 1.3597303     | 1.3161213     | 1.1122604     | 1.1122604     | 1.0107454     | 1.0107454     | 1.0107454     | 0.8360128     | 0.7764232     | 0.7764232     | 0.7176477     |
| ChaGo-K-1                  | 0.9027652     | 1.0011962     | 0.9027652     | 0.9027652     | 0.7489773     | 1.0011962     | 1.0011962     | 0.7489773     | 1.0011962     | 1.0011962     | 1.0011962     |
| A373 C6                    | 0.8999572     | 1.085051      | 0.8999572     | 1.0501332     | 1.0501332     | 1.1413339     | 1.1413339     | 1.0501332     | 1.0501332     | 1.0501332     | 1.0501332     |

| ProbeSetID  | SNP_A-198999 | SNP_A-207543 | SNP_A-186744 | SNP_A-214513 | SNP_A-223608 | SNP_A-219699 | SNP_A-198999 | SNP_A-221241 | SNP_A-195832 | SNP_A-202485 | SNP_A-195970 |
|-------------|--------------|--------------|--------------|--------------|--------------|--------------|--------------|--------------|--------------|--------------|--------------|
| Affy.SNP.ID | 2569010      | 6293987      | 11350852     | 7356959      | 8796070      | 8136360      | 2569034      | 8389173      | 12670418     | 5521926      | 12690481     |
| dbSNP       | rs2110290    | rs12671550   | rs7803660    | rs7796139    | rs980653     | rs13244925   | rs10488142   | rs17172446   | rs6947594    | rs12666347   | rs17172448   |
| Chromosome  | 7            | 7            | 7            | 7            | 7            | 7            | 7            | 7            | 7            | 7            | 7            |
| Position    | 54946977     | 54947884     | 54948280     | 54950085     | 54960099     | 54966465     | 54970156     | 54976807     | 54977506     | 54980139     | 54981429     |
| Strand      | -            | +            | +            | +            | +            | +            | -            | +            | +            | +            | +            |
| Cytoband    | p11.2        |
| MES-SA      | 0.7528253    | 0.7528253    | 0.7280241    | 0.6639377    | 0.6639377    | 0.6639377    | 0.6483078    | 0.4327235    | 0.6235642    | 0.6235642    | 0.6235642    |
| OAW28       | 0.8076479    | 0.8753291    | 0.8076479    | 0.8076479    | 0.8076479    | 0.8753291    | 0.8753291    | 0.8646361    | 0.8753291    | 0.8753291    | 0.8646361    |
| NCI-H460    | 0.4179333    | 0.6484461    | 0.4179333    | 0.6484461    | 0.6484461    | 0.7269926    | 0.7269926    | 0.6484461    | 0.7269926    | 0.7269926    | 0.7269926    |



















| ProbeSetID    | SNP_A-2082958 | SNP_A-1989993 | SNP_A-1989996 | SNP_A-1989999 | SNP_A-2099333 | SNP_A-4303186 | SNP_A-4246316 | SNP_A-4273285 | SNP_A-2183844 | SNP_A-4252184 | SNP_A-2234157 |
|---------------|---------------|---------------|---------------|---------------|---------------|---------------|---------------|---------------|---------------|---------------|---------------|
| Affy_SNP.ID   | 6417094       | 2569063       | 2569064       | 2569066       | 6658895       | 9748516       | 10659347      | 5794037       | 7934783       | 11486260      | 8763615       |
| dbSNP         | rs4947984     | rs2075109     | rs2075110     | rs11506105    | rs11536635    | rs7781264     | rs2241055     | rs6968014     | rs845558      | rs845559      | rs7795728     |
| Chromosome    | 7             | 7             | 7             | 7             | 7             | 7             | 7             | 7             | 7             | 7             | 7             |
| Position      | 54985525      | 54993112      | 54993368      | 54994386      | 55003224      | 55005049      | 55014670      | 55021651      | 55021797      | 55022169      | 55024300      |
| Strand        | +             | +             | -             | -             | -             | -             | +             | +             | -             | +             | +             |
| Cytoband      | p11.2         |
| KYSE-520      | 6.795414      | 6.638875      | 6.605428      | 6.605428      | 6.605428      | 6.605428      | 6.765417      | 6.605428      | 6.541713      | 6.541713      | 6.605428      |
| OE21          | 6.598788      | 6.517906      | 6.517906      | 6.517906      | 6.517906      | 6.496708      | 6.598788      | 6.496708      | 6.425512      | 6.425512      | 6.598788      |
| H3255         | 6.711301      | 6.068365      | 6.068365      | 6.068365      | 6.068365      | 6.059432      | 6.178403      | 6.059432      | 5.719868      | 5.719868      | 6.059432      |
| NCI-H1573     | 6.499318      | 6.185886      | 6.185886      | 6.185886      | 5.776193      | 5.776193      | 5.937855      | 5.776193      | 5.776193      | 5.776193      | 5.776193      |
| HSC-2         | 5.640284      | 5.637055      | 5.637055      | 5.637055      | 5.637055      | 5.277746      | 5.472184      | 5.472184      | 5.273699      | 5.273699      | 5.273699      |
| HCC-827       | 5.505771      | 5.484077      | 5.006087      | 5.006087      | 5.006087      | 4.554309      | 5.006087      | 5.006087      | 5.01294       | 5.01294       | 5.01294       |
| Hs 852.T      | 5.689587      | 5.689587      | 5.689587      | 5.689587      | 5.608417      | 5.608417      | 5.69901       | 5.608417      | 5.564213      | 5.564213      | 5.564213      |
| KYSE-30       | 5.660296      | 5.161531      | 5.045703      | 5.045703      | 5.028042      | 5.028042      | 5.055517      | 5.028042      | 5.028042      | 5.028042      | 5.028042      |
| A431          | 5.164804      | 5.000207      | 4.849715      | 4.702284      | 4.606726      | 4.322911      | 4.459508      | 4.362625      | 4.362625      | 4.362625      | 4.362625      |
| BT-20         | 4.98627       | 4.892512      | 4.892512      | 4.892512      | 4.892512      | 5.03707       | 5.150625      | 5.150625      | 4.892512      | 4.892512      | 4.849844      |
| Ca9-22        | 4.894021      | 4.894021      | 4.894021      | 4.894021      | 3.939181      | 3.862511      | 3.862511      | 3.862511      | 3.862511      | 3.862511      | 3.862511      |
| NCI-H1568     | 4.330074      | 4.330074      | 4.639796      | 4.468095      | 4.362549      | 4.362549      | 4.468095      | 4.362549      | 4.330074      | 4.330074      | 4.330074      |
| PC-9          | 4.228008      | 4.228008      | 4.161384      | 4.161384      | 4.159569      | 4.161384      | 4.50813       | 4.161384      | 4.161384      | 4.307727      | 4.161384      |
| PNT1A         | 4.423277      | 4.423277      | 4.423277      | 4.391829      | 3.911622      | 3.909822      | 3.911622      | 3.909822      | 3.909822      | 3.909822      | 3.877783      |
| LUDLU-1       | 4.328124      | 4.218594      | 4.218594      | 4.038422      | 3.958441      | 3.937206      | 3.958441      | 3.937206      | 3.937206      | 3.937206      | 3.936454      |
| RERF-LC-MA    | 3.821465      | 3.798351      | 3.798351      | 3.798351      | 3.798351      | 3.759412      | 3.821465      | 3.759412      | 3.759412      | 3.759412      | 3.655638      |
| U373 MG       | 3.914574      | 3.89688       | 3.86716       | 3.785303      | 3.633584      | 3.624002      | 3.624002      | 3.359145      | 3.332595      | 3.332595      | 3.184345      |
| KYSE-450      | 3.891358      | 3.891358      | 3.881491      | 3.881491      | 3.881491      | 3.881491      | 4.009916      | 4.009916      | 3.971591      | 3.971591      | 3.971591      |
| KOSC-2 cl3-43 | 3.627747      | 3.44257       | 3.44257       | 3.44257       | 3.44257       | 3.014909      | 3.014909      | 3.266909      | 3.223591      | 3.223591      | 3.223591      |
| LU65          | 3.519079      | 3.519079      | 3.398615      | 3.398615      | 3.398615      | 3.507654      | 3.543247      | 3.507654      | 3.428992      | 3.428992      | 3.428992      |
| PC-14         | 3.752228      | 3.752228      | 3.752228      | 3.721957      | 3.468929      | 3.468929      | 3.476991      | 3.476991      | 3.476991      | 3.476991      | 3.476991      |
| NCI-H596      | 3.6606        | 3.6606        | 3.6606        | 3.6606        | 3.631725      | 3.6606        | 3.966662      | 3.966662      | 3.631725      | 3.631725      | 3.477121      |
| PC-3 [JPC-3]  | 3.556417      | 3.556417      | 3.556417      | 3.564817      | 3.564817      | 3.647499      | 3.647499      | 3.647499      | 3.647499      | 3.647499      | 3.647499      |
| 647-V         | 3.495411      | 2.892311      | 3.052298      | 3.052298      | 3.052298      | 2.75709       | 3.052298      | 3.052298      | 3.070951      | 3.070951      | 3.070951      |
| HSC-3         | 3.689422      | 3.570758      | 3.570758      | 3.570758      | 3.483098      | 3.083277      | 3.083277      | 3.026608      | 3.026608      | 3.026608      | 3.026608      |
| CASKI         | 3.548381      | 3.534216      | 3.548381      | 3.534216      | 3.4255        | 3.4255        | 3.534216      | 3.534216      | 3.534216      | 3.534216      | 3.593694      |
| JHH-4         | 3.241267      | 3.141577      | 3.141577      | 3.141577      | 3.141577      | 2.937333      | 2.937333      | 2.937333      | 3.023907      | 3.023907      | 3.023907      |
| CAL-85-1      | 3.461593      | 3.406325      | 3.406325      | 3.406325      | 3.461593      | 3.178683      | 3.178683      | 3.170723      | 2.800803      | 2.800803      | 2.800803      |
| BT-549        | 3.576227      | 3.418528      | 3.086527      | 3.086527      | 3.086527      | 2.981832      | 3.086527      | 3.183837      | 3.097396      | 3.097396      | 3.097396      |
| HSC-4         | 3.227337      | 3.003306      | 3.227337      | 3.227337      | 3.227337      | 2.991564      | 2.991564      | 2.977606      | 2.977606      | 2.977606      | 2.977606      |
| NUGC-4        | 3.338054      | 3.255214      | 3.101801      | 3.101801      | 3.101801      | 3.101801      | 3.101801      | 3.101801      | 3.101801      | 3.101801      | 3.101801      |
| BICR10        | 3.315289      | 3.315289      | 3.315289      | 3.315289      | 3.436105      | 3.252159      | 3.436105      | 3.367842      | 3.252159      | 3.252159      | 3.088981      |
| KYSE-140      | 3.380047      | 3.141975      | 3.269967      | 3.269967      | 3.269967      | 3.296535      | 3.34572       | 3.34572       | 3.296535      | 3.296535      | 3.296535      |
| SNU-5         | 3.429942      | 3.429942      | 3.429942      | 3.429942      | 3.056182      | 3.120892      | 3.293975      | 3.176976      | 3.176976      | 3.176976      | 3.120892      |
| SK-MEL-3      | 3.329676      | 3.329676      | 3.408168      | 3.408168      | 3.282028      | 3.408168      | 3.41406       | 3.408168      | 3.249072      | 3.249072      | 3.249072      |
| KYSE-180      | 3.383399      | 3.350747      | 3.344869      | 3.344869      | 2.9046        | 2.846382      | 3.344869      | 3.344869      | 3.298136      | 3.298136      | 3.298136      |
| PNT2          | 3.43292       | 3.387888      | 3.387888      | 3.345122      | 3.324621      | 3.321656      | 3.324621      | 3.321656      | 3.321656      | 3.321656      | 3.234785      |
| G-361         | 3.415262      | 3.366944      | 3.366944      | 3.366944      | 3.366944      | 3.158167      | 3.457678      | 3.158167      | 3.116153      | 3.116153      | 3.073389      |
| KYSE-220      | 3.322587      | 3.322587      | 3.487512      | 3.322587      | 3.322587      | 3.446925      | 3.446925      | 3.446925      | 3.336992      | 3.336992      | 3.291717      |
| WM-115        | 3.389698      | 3.33799       | 3.088981      | 3.335003      | 3.015894      | 2.899323      | 3.015894      | 3.015894      | 2.899323      | 2.899323      | 2.899323      |
| KYSE-50       | 3.311885      | 3.311885      | 3.442913      | 3.311885      | 3.311885      | 3.311885      | 3.311885      | 3.266165      | 3.066828      | 3.066828      | 2.931312      |
| OSC-20        | 3.074493      | 3.037513      | 3.254485      | 3.455998      | 3.455998      | 3.455998      | 3.254485      | 2.432376      | 2.432376      | 2.432376      | 2.432376      |

| ProbeSetID         | SNP_A-2082958 | SNP_A-1989999 | SNP_A-1989999 | SNP_A-1989999 | SNP_A-2099333 | SNP_A-4303186 | SNP_A-4246316 | SNP_A-4273285 | SNP_A-2183844 | SNP_A-4252184 | SNP_A-2234157 |
|--------------------|---------------|---------------|---------------|---------------|---------------|---------------|---------------|---------------|---------------|---------------|---------------|
| Affy_SNP.ID        | 6417094       | 2569063       | 2569064       | 2569066       | 6658895       | 9748516       | 10659347      | 5794037       | 7934783       | 11486260      | 8763615       |
| dbSNP              | rs4947984     | rs2075109     | rs2075110     | rs11506105    | rs11536635    | rs7781264     | rs2241055     | rs6968014     | rs845558      | rs845559      | rs7795728     |
| Chromosome         | 7             | 7             | 7             | 7             | 7             | 7             | 7             | 7             | 7             | 7             | 7             |
| Position           | 54985525      | 54993112      | 54993368      | 54994386      | 55003224      | 55005049      | 55014670      | 55021651      | 55021797      | 55022169      | 55024300      |
| Strand             | +             | +             | -             | -             | -             | -             | +             | +             | -             | +             | +             |
| Cytoband           | p11.2         |
| SAT                | 3.163339      | 3.143383      | 3.163339      | 3.163339      | 3.410532      | 2.852776      | 2.852776      | 2.402816      | 2.402816      | 2.402816      | 2.614624      |
| NCI-H1650          | 3.21881       | 2.950222      | 2.833398      | 2.811614      | 2.811614      | 2.630843      | 2.728585      | 2.728585      | 2.728585      | 2.728585      | 2.728585      |
| SK-CO-1            | 3.104548      | 3.104548      | 3.104548      | 3.104548      | 3.069468      | 3.064365      | 3.069468      | 3.064365      | 3.013955      | 3.013955      | 3.064365      |
| NCI-H1792          | 3.326225      | 3.038701      | 2.860977      | 2.860977      | 2.860977      | 2.646902      | 2.860977      | 3.006524      | 3.006524      | 3.006524      | 3.006524      |
| NCI-H1703          | 3.229891      | 3.19572       | 2.881341      | 2.881341      | 2.881341      | 2.429356      | 2.881341      | 2.893624      | 2.893624      | 2.893624      | 2.893624      |
| PCI 4B             | 3.216227      | 3.168299      | 3.168299      | 2.937677      | 2.937677      | 2.895391      | 2.937677      | 2.971565      | 2.937677      | 2.937677      | 2.971565      |
| NCI-H1563          | 2.786788      | 2.733679      | 2.733679      | 2.733679      | 2.733679      | 2.515928      | 2.733679      | 2.733679      | 2.733679      | 2.733679      | 2.515928      |
| NCI-H841           | 3.21368       | 3.210031      | 3.210031      | 2.978593      | 2.978593      | 2.727049      | 2.79542       | 2.79542       | 2.753814      | 2.753814      | 2.753814      |
| LOU-NH91           | 3.011782      | 2.897802      | 2.822852      | 2.822852      | 2.822852      | 2.822852      | 2.897802      | 2.897802      | 2.897802      | 2.897802      | 2.897802      |
| HuH-7              | 3.106544      | 2.925215      | 2.925215      | 2.925215      | 3.145741      | 2.925215      | 2.925215      | 2.379725      | 2.379725      | 2.379725      | 2.379725      |
| LC-1 sq            | 3.238882      | 2.60998       | 2.887532      | 2.887532      | 2.887532      | 2.485559      | 2.485559      | 2.213795      | 2.213795      | 2.213795      | 2.446536      |
| NCI-H522           | 3.196711      | 3.088288      | 3.088288      | 2.781324      | 2.781324      | 2.610902      | 2.781324      | 2.781324      | 2.610902      | 2.610902      | 2.781324      |
| 201T               | 3.209689      | 2.810754      | 2.810754      | 2.529997      | 2.529997      | 2.493619      | 2.529997      | 2.529997      | 2.529997      | 2.529997      | 2.53985       |
| G-292 Clone A141B1 | 3.079211      | 3.079211      | 3.111819      | 3.111819      | 3.111819      | 2.868771      | 2.868771      | 2.868771      | 2.868771      | 2.868771      | 2.868771      |
| RPMI-7951          | 3.251775      | 3.237276      | 3.237276      | 2.970936      | 2.788633      | 2.785943      | 2.788633      | 2.788633      | 2.788633      | 2.788633      | 2.788633      |
| BEN                | 2.801076      | 2.597317      | 2.573762      | 2.597317      | 2.597317      | 2.597317      | 2.918863      | 2.970854      | 2.918863      | 2.918863      | 2.876586      |
| NCI-H2228          | 3.161854      | 3.161854      | 3.203498      | 3.161854      | 2.925508      | 3.161854      | 3.3276        | 3.161854      | 2.925508      | 2.925508      | 2.580554      |
| HCC-44             | 2.863192      | 2.543891      | 2.473463      | 2.543891      | 2.543891      | 2.449649      | 2.543891      | 2.543891      | 2.543891      | 2.543891      | 2.449649      |
| NCI-H1734          | 2.851112      | 2.851112      | 2.974304      | 2.993099      | 2.993099      | 2.993099      | 3.045608      | 3.045608      | 3.045608      | 3.045608      | 3.045608      |
| YKG-1              | 2.821648      | 2.654811      | 2.654811      | 2.654811      | 2.654811      | 2.629834      | 2.629834      | 2.431245      | 2.431245      | 2.431245      | 2.431245      |
| MOG-G-CCM          | 2.961564      | 2.961564      | 2.961564      | 2.917898      | 2.917898      | 2.8508        | 2.917898      | 2.917898      | 2.8508        | 2.8508        | 2.814401      |
| SK-BR-3            | 2.811985      | 2.62068       | 2.62068       | 2.62068       | 2.62068       | 2.62068       | 2.757023      | 2.757023      | 2.757023      | 2.757023      | 2.757023      |
| COLO 858           | 3.008681      | 3.008681      | 3.008681      | 3.008681      | 2.972317      | 2.901488      | 2.972317      | 2.972317      | 2.972317      | 2.972317      | 2.916039      |
| SCC-4              | 2.995215      | 2.925539      | 2.995215      | 2.995215      | 3.340602      | 2.995215      | 2.995215      | 2.185984      | 2.158654      | 2.158654      | 2.185984      |
| TE7                | 2.858032      | 2.823764      | 2.823764      | 2.823764      | 2.823764      | 2.7065        | 2.7065        | 2.474528      | 2.474528      | 2.474528      | 2.498442      |
| NCI-H1755          | 3.056232      | 3.056232      | 2.680236      | 2.623436      | 2.623436      | 2.623436      | 2.680236      | 2.829916      | 2.778252      | 2.778252      | 2.623436      |
| CaR-1              | 2.836844      | 2.836844      | 3.024707      | 3.024707      | 3.024707      | 2.438009      | 2.438009      | 2.438009      | 2.724468      | 2.724468      | 2.724468      |
| OVISE              | 2.872409      | 2.872409      | 2.964705      | 2.973583      | 2.973583      | 2.973583      | 2.973583      | 2.530334      | 2.530334      | 2.530334      | 2.530334      |
| Calu-3             | 2.947605      | 2.89851       | 2.89851       | 2.89851       | 2.741489      | 2.674258      | 2.741489      | 2.741489      | 2.674258      | 2.674258      | 2.741489      |
| NCI-H1623          | 2.966213      | 2.820053      | 3.001706      | 2.820053      | 2.820053      | 2.820053      | 3.001706      | 2.820053      | 2.667981      | 2.667981      | 2.667981      |
| BICR 78            | 2.950678      | 2.950678      | 2.782249      | 2.756535      | 2.756535      | 2.662057      | 2.756535      | 2.782249      | 2.756535      | 2.756535      | 2.756535      |
| LS 123             | 3.095048      | 3.095048      | 3.095048      | 2.882053      | 2.882053      | 2.854172      | 2.854172      | 2.759863      | 2.604931      | 2.604931      | 2.516157      |
| AN3CA              | 2.941199      | 2.929357      | 2.941199      | 2.941199      | 3.010512      | 2.941199      | 2.941199      | 2.795069      | 2.712254      | 2.712254      | 2.429381      |
| 639-V              | 2.805324      | 2.549549      | 2.805324      | 2.805324      | 2.8107        | 2.8107        | 2.8107        | 2.53712       | 1.990462      | 1.990462      | 1.990462      |
| WM 266-4           | 2.758188      | 2.758188      | 2.764571      | 2.764571      | 3.039859      | 3.039859      | 3.078645      | 3.039859      | 2.515373      | 2.515373      | 2.480336      |
| SKN-3              | 2.770619      | 2.770619      | 2.770619      | 2.770619      | 2.782018      | 2.532985      | 2.532985      | 2.250244      | 2.250244      | 2.250244      | 2.250244      |
| NCI-H2085          | 2.928009      | 2.928009      | 2.928009      | 2.808422      | 2.808422      | 2.928009      | 3.022977      | 2.928009      | 2.903862      | 2.903862      | 2.808422      |
| RKN                | 2.708848      | 2.560487      | 2.560487      | 2.560487      | 2.560487      | 2.098202      | 2.098202      | 2.063101      | 2.063101      | 2.063101      | 2.063101      |
| MKN45              | 2.915472      | 2.701515      | 2.701515      | 2.701515      | 2.670681      | 2.680521      | 2.701515      | 2.864037      | 2.864037      | 2.864037      | 2.86907       |
| KHOS/NP            | 3.009302      | 2.705314      | 2.705314      | 2.705314      | 2.705314      | 2.705314      | 2.748688      | 2.705314      | 2.651613      | 2.651613      | 2.651613      |
| SNU-16             | 2.898964      | 2.898964      | 2.889705      | 2.780158      | 2.715431      | 2.780158      | 2.848673      | 2.848673      | 2.780158      | 2.780158      | 2.766308      |
| HCE7               | 2.656444      | 2.634898      | 2.471822      | 2.471822      | 2.471822      | 2.3488        | 2.292985      | 2.292985      | 2.292985      | 2.292985      | 2.292985      |
| OCUG-1             | 2.742382      | 2.742382      | 2.836887      | 2.836887      | 2.836887      | 2.318845      | 2.314269      | 2.268889      | 2.314269      | 2.314269      | 2.314269      |
| NL20-TA            | 2.960892      | 2.581733      | 2.581733      | 2.581733      | 2.581733      | 2.549597      | 2.574117      | 2.574117      | 2.549597      | 2.549597      | 2.574117      |
| KYSE-70            | 2.788359      | 2.788359      | 2.720448      | 2.720448      | 2.720448      | 2.720448      | 2.806601      | 2.806601      | 2.720448      | 2.720448      | 2.746283      |
| MOG-G-UJVV         | 2.713888      | 2.703788      | 2.890246      | 2.890246      | 3.032303      | 2.844337      | 2.844337      | 2.734518      | 2.598888      | 2.598888      | 2.598888      |
| NCI-H2342          | 2.985368      | 2.86797       | 2.86797       | 2.86797       | 2.86797       | 2.847511      | 2.847511      | 2.847511      | 2.832199      | 2.832199      | 2.832199      |

| ProbeSetID         | SNP_A-2082958 | SNP_A-1989999 | SNP_A-1989999 | SNP_A-1989999 | SNP_A-2099333 | SNP_A-4303186 | SNP_A-4246316 | SNP_A-4273285 | SNP_A-2183844 | SNP_A-4252184 | SNP_A-2234151 |
|--------------------|---------------|---------------|---------------|---------------|---------------|---------------|---------------|---------------|---------------|---------------|---------------|
| Affy_SNP.ID        | 6417094       | 2569063       | 2569064       | 2569066       | 6658895       | 9748516       | 10659347      | 5794037       | 7934783       | 11486260      | 8763615       |
| dbSNP              | rs4947984     | rs2075109     | rs2075110     | rs11506105    | rs11536635    | rs7781264     | rs2241055     | rs6968014     | rs845558      | rs845559      | rs7795728     |
| Chromosome         | 7             | 7             | 7             | 7             | 7             | 7             | 7             | 7             | 7             | 7             | 7             |
| Position           | 54985525      | 54993112      | 54993368      | 54994386      | 55003224      | 55005049      | 55014670      | 55021651      | 55021797      | 55022169      | 55024300      |
| Strand             | +             | +             | -             | -             | -             | -             | +             | +             | -             | +             | +             |
| Cytoband           | p11.2         |
| ABC-1              | 2.855212      | 2.855212      | 2.585563      | 2.855212      | 2.723537      | 2.723537      | 2.855212      | 2.855212      | 2.855212      | 2.855212      | 2.723537      |
| NCI-H650           | 2.854933      | 2.833355      | 2.833355      | 2.629671      | 2.629671      | 2.589377      | 2.589377      | 2.589377      | 2.589377      | 2.589377      | 2.589377      |
| FTC 133            | 2.930674      | 2.901161      | 2.901161      | 2.853721      | 2.548702      | 2.498599      | 2.548702      | 2.548702      | 2.548702      | 2.548702      | 2.569538      |
| MDST8              | 2.800475      | 2.779563      | 2.779563      | 2.741869      | 2.679495      | 2.659843      | 2.679495      | 2.741869      | 2.659843      | 2.659843      | 2.636425      |
| KYSE-150           | 2.853313      | 2.830263      | 2.830133      | 2.830263      | 2.830133      | 2.762855      | 2.830133      | 2.830133      | 2.762855      | 2.762855      | 2.762855      |
| SW 48              | 3.064594      | 3.064594      | 3.064594      | 3.01044       | 2.773247      | 2.851531      | 2.851531      | 2.851531      | 2.767149      | 2.767149      | 2.759752      |
| NCI-H2023          | 2.981808      | 2.981808      | 2.99363       | 2.981808      | 2.543019      | 2.480177      | 2.53615       | 2.53615       | 2.53615       | 2.53615       | 2.543019      |
| COLO-680N          | 2.625644      | 2.602602      | 2.536845      | 2.536845      | 2.625644      | 2.536845      | 2.625644      | 2.726073      | 2.536845      | 2.536845      | 2.640357      |
| KP-4               | 2.638114      | 2.596308      | 2.638114      | 2.638114      | 2.638114      | 2.08156       | 2.08156       | 2.048398      | 2.048398      | 2.048398      | 2.048398      |
| SW-1710            | 2.828065      | 2.703528      | 2.80065       | 2.80065       | 2.80065       | 2.486302      | 2.486302      | 2.437476      | 2.437476      | 2.437476      | 2.437476      |
| KATO III           | 2.75679       | 2.669823      | 2.510953      | 2.105082      | 1.878288      | 1.796866      | 1.796866      | 1.796866      | 1.768602      | 1.768602      | 1.796866      |
| RERF-GC-1B         | 2.798813      | 2.667946      | 2.474883      | 2.474883      | 2.474883      | 2.474883      | 2.50145       | 2.812758      | 2.825715      | 2.825715      | 2.825715      |
| CAL-29             | 2.691451      | 2.512451      | 2.691451      | 2.750591      | 2.750591      | 2.512451      | 1.87743       | 2.706624      | 2.141685      | 2.141685      | 2.141685      |
| Sci-1              | 2.816032      | 2.816032      | 2.936228      | 2.953033      | 2.936228      | 2.54205       | 2.936228      | 2.54205       | 2.42104       | 2.42104       | 2.54205       |
| NCI-H810           | 2.887754      | 2.870222      | 2.870222      | 2.866635      | 2.810111      | 2.708667      | 2.810111      | 2.708667      | 2.686315      | 2.686315      | 2.538342      |
| T.Tn               | 2.826181      | 2.714374      | 2.807637      | 2.719391      | 2.489591      | 2.489591      | 2.667878      | 2.667878      | 2.523736      | 2.523736      | 2.523736      |
| DOK                | 2.862593      | 2.862593      | 2.862593      | 2.755414      | 2.512101      | 2.512101      | 2.655651      | 2.655651      | 2.610155      | 2.610155      | 2.610155      |
| COLO 741           | 2.654351      | 2.6317        | 2.654351      | 2.654351      | 2.654351      | 2.609221      | 2.654351      | 2.654351      | 2.654351      | 2.654351      | 2.609221      |
| NCI-H1651          | 2.787206      | 2.642702      | 2.426433      | 2.426433      | 2.426433      | 2.354866      | 2.354866      | 2.354866      | 2.354866      | 2.354866      | 2.354866      |
| RWPE-1             | 2.708904      | 2.708092      | 2.376409      | 2.376409      | 2.376409      | 2.455729      | 2.639594      | 2.536462      | 2.536462      | 2.536462      | 2.536462      |
| KYSE-270           | 2.808357      | 2.641732      | 2.436942      | 2.436942      | 2.436942      | 2.360792      | 2.426495      | 2.426495      | 2.426495      | 2.426495      | 2.448476      |
| NCI-H196           | 2.855963      | 2.855963      | 2.632094      | 2.630657      | 2.630657      | 2.630657      | 2.632094      | 2.630657      | 2.517641      | 2.517641      | 2.303925      |
| SK-LU-1            | 2.711792      | 2.64471       | 2.711792      | 2.711792      | 2.711792      | 2.711792      | 2.720189      | 2.711792      | 2.439235      | 2.439235      | 2.455716      |
| NCI-H1693 (ship16) | 2.757767      | 2.757767      | 2.757767      | 2.749322      | 2.757767      | 2.749322      | 2.749322      | 2.749322      | 2.600704      | 2.600704      | 2.479835      |
| NCI-H2135          | 2.58594       | 2.58594       | 2.810307      | 2.810307      | 2.846638      | 2.810307      | 2.824208      | 2.824208      | 2.630657      | 2.630657      | 2.630657      |
| VMRC-RCW           | 2.814999      | 2.320911      | 2.814999      | 2.814999      | 2.814999      | 2.27149       | 2.27149       | 2.27149       | 1.817042      | 1.817042      | 1.884856      |
| RERF-LC-Sq1        | 2.588083      | 2.588083      | 2.588083      | 2.740429      | 2.815673      | 2.815673      | 2.815673      | 2.740429      | 2.740429      | 2.740429      | 2.480897      |
| A375.S2            | 2.963817      | 2.732202      | 2.963817      | 2.80195       | 2.80195       | 2.80195       | 2.80195       | 2.602051      | 2.569905      | 2.569905      | 2.531246      |
| SW 1116            | 2.910699      | 2.910699      | 2.910699      | 2.910699      | 2.910699      | 2.784624      | 2.928594      | 2.784624      | 2.635731      | 2.635731      | 2.635731      |
| CAL-148            | 2.922303      | 2.640091      | 2.948374      | 2.907341      | 2.948374      | 2.907341      | 2.907341      | 1.89433       | 1.89433       | 1.89433       | 1.642784      |
| 22RV1              | 2.680441      | 2.499218      | 2.468524      | 2.468524      | 2.468524      | 2.356792      | 2.727004      | 2.727004      | 2.588024      | 2.588024      | 2.588024      |
| IM-95              | 2.637686      | 2.637686      | 2.564571      | 2.564571      | 2.564571      | 2.637686      | 2.720706      | 2.637686      | 2.720706      | 2.720706      | 2.637686      |
| HT 115             | 2.888136      | 2.828488      | 2.828488      | 2.621192      | 2.621192      | 2.621192      | 2.621192      | 2.621192      | 2.609548      | 2.609548      | 2.621192      |
| NCI-H727           | 2.636206      | 2.636206      | 2.661507      | 2.372152      | 2.372152      | 2.253232      | 2.626979      | 2.626979      | 2.253232      | 2.253232      | 2.253232      |
| T.T                | 2.616559      | 2.44165       | 2.646752      | 2.646752      | 2.646752      | 2.744389      | 2.744389      | 2.718233      | 2.718233      | 2.718233      | 2.718233      |
| OE33               | 2.663055      | 2.503426      | 2.503426      | 2.503426      | 2.503426      | 2.48992       | 2.503426      | 2.672932      | 2.503426      | 2.503426      | 2.559775      |
| PLC/PRF/5          | 2.71534       | 2.71534       | 2.618969      | 2.590482      | 2.590482      | 2.42185       | 2.42185       | 2.590482      | 2.42185       | 2.42185       | 2.590482      |
| SAS                | 2.142619      | 2.082654      | 2.082654      | 2.142619      | 2.142619      | 2.082654      | 2.040926      | 2.040926      | 2.345589      | 2.345589      | 2.345589      |
| MKN74              | 2.624157      | 2.532901      | 2.46075       | 2.46075       | 2.46075       | 2.366757      | 2.46075       | 2.652753      | 2.623959      | 2.623959      | 2.623959      |
| HMCB               | 2.703291      | 2.6165        | 2.703291      | 2.703291      | 2.776699      | 2.6165        | 2.776699      | 2.776699      | 2.776699      | 2.776699      | 2.776699      |
| A2058              | 2.689237      | 2.6649        | 2.32992       | 2.32992       | 2.32992       | 2.32992       | 2.32992       | 2.32992       | 1.961133      | 1.961133      | 2.016357      |
| HCC-366            | 2.335936      | 2.335936      | 2.34381       | 2.34381       | 2.599826      | 2.34381       | 2.34381       | 2.205961      | 2.205961      | 2.205961      | 2.205961      |
| P31/FUJ            | 2.447636      | 2.447636      | 2.523266      | 2.544966      | 2.544966      | 2.523266      | 2.523266      | 2.465395      | 2.434213      | 2.434213      | 2.434213      |
| SW 1417            | 2.665496      | 2.665496      | 2.672327      | 2.672327      | 2.665496      | 2.448328      | 2.663571      | 2.448328      | 2.328401      | 2.328401      | 2.328401      |
| KMRC-1             | 2.569147      | 2.403268      | 2.365791      | 2.365791      | 2.365791      | 2.355657      | 2.259331      | 1.919125      | 1.919125      | 1.919125      | 2.233142      |
| OAW42              | 2.684119      | 2.664958      | 2.664958      | 2.686076      | 2.664958      | 2.540041      | 2.75861       | 2.761082      | 2.75861       | 2.75861       | 2.540041      |
| PE/CA-PJ15         | 2.773809      | 2.773809      | 2.989917      | 2.773809      | 2.773809      | 2.66584       | 2.66584       | 2.471062      | 2.35957       | 2.35957       | 2.35957       |

| ProbeSetID   | SNP_A-2082958 | SNP_A-1989994 | SNP_A-1989996 | SNP_A-1989999 | SNP_A-2099333 | SNP_A-4303186 | SNP_A-4246318 | SNP_A-4273285 | SNP_A-2183844 | SNP_A-4252184 | SNP_A-2234157 |
|--------------|---------------|---------------|---------------|---------------|---------------|---------------|---------------|---------------|---------------|---------------|---------------|
| Affy_SNP.ID  | 6417094       | 2569063       | 2569064       | 2569066       | 6658895       | 9748516       | 10659347      | 5794037       | 7934783       | 11486260      | 8763615       |
| dbSNP        | rs4947984     | rs2075109     | rs2075110     | rs11506105    | rs11536635    | rs7781264     | rs2241055     | rs6968014     | rs845558      | rs845559      | rs7795728     |
| Chromosome   | 7             | 7             | 7             | 7             | 7             | 7             | 7             | 7             | 7             | 7             | 7             |
| Position     | 54985525      | 54993112      | 54993368      | 54994386      | 55003224      | 55005049      | 55014670      | 55021651      | 55021797      | 55022169      | 55024300      |
| Strand       | +             | +             | -             | -             | -             | -             | +             | +             | -             | +             | +             |
| Cytoband     | p11.2         |
| NUGC-3       | 2.658408      | 2.447154      | 2.447154      | 2.447154      | 2.375649      | 2.447154      | 2.560321      | 2.560321      | 2.560321      | 2.560321      | 2.560321      |
| DMS 273      | 2.410622      | 2.324497      | 2.410622      | 2.410622      | 2.441353      | 2.441353      | 2.441353      | 2.441353      | 2.353233      | 2.353233      | 2.353233      |
| MKN1         | 2.628987      | 2.471087      | 2.471087      | 2.471087      | 2.471087      | 2.367519      | 2.503256      | 2.503256      | 2.503256      | 2.503256      | 2.503256      |
| RERF-LC-Ad2  | 2.609326      | 2.609326      | 2.634979      | 2.634979      | 2.634979      | 2.609326      | 2.609326      | 2.634979      | 2.634979      | 2.634979      | 2.522424      |
| TASK1        | 2.398233      | 2.219162      | 2.398233      | 2.398233      | 2.398233      | 1.949822      | 1.949822      | 1.985566      | 1.985566      | 1.985566      | 1.985566      |
| NCI-H23      | 2.737593      | 2.525852      | 2.737593      | 2.525852      | 2.525852      | 2.157493      | 2.157493      | 2.157493      | 2.157493      | 2.157493      | 2.414686      |
| KP-1N        | 2.230799      | 2.013314      | 2.230799      | 2.230799      | 2.230799      | 2.013314      | 2.013314      | 2.013314      | 2.062621      | 2.062621      | 2.062621      |
| NCI-H711     | 2.617164      | 2.558003      | 2.446734      | 2.446734      | 2.446734      | 2.345385      | 2.345385      | 2.345385      | 2.345385      | 2.345385      | 2.345385      |
| NCI-H661     | 2.610003      | 2.585352      | 2.610003      | 2.669251      | 2.631295      | 2.610003      | 2.631295      | 2.631295      | 2.610003      | 2.610003      | 2.610003      |
| EBC-1        | 2.42825       | 2.42825       | 2.42825       | 2.573762      | 2.655375      | 2.790126      | 2.790126      | 2.655375      | 2.609022      | 2.609022      | 2.465322      |
| JHH-6        | 2.505364      | 2.293558      | 2.642355      | 2.642355      | 2.76178       | 2.293558      | 2.293558      | 2.054832      | 2.054832      | 2.054832      | 2.054832      |
| NB69         | 2.931249      | 2.498733      | 2.498733      | 2.498733      | 2.498733      | 2.498733      | 2.498733      | 2.299377      | 2.299377      | 2.299377      | 2.299377      |
| SR           | 2.50202       | 2.374155      | 2.50202       | 2.462951      | 2.50202       | 2.50202       | 2.646717      | 2.50202       | 2.462951      | 2.462951      | 2.403356      |
| T84          | 2.339452      | 2.339452      | 2.428822      | 2.485876      | 2.485876      | 2.428822      | 2.485876      | 2.529241      | 2.529241      | 2.529241      | 2.566326      |
| HO-1-N-1     | 2.522111      | 2.342606      | 2.522111      | 2.522111      | 2.563124      | 2.02611       | 1.655004      | 1.712729      | 1.712729      | 1.712729      | 1.712729      |
| BALL-1       | 2.490139      | 2.490139      | 2.490139      | 2.588918      | 2.668919      | 2.490139      | 2.490139      | 2.368865      | 2.368865      | 2.368865      | 2.368865      |
| Nthy-ori 3-1 | 2.418819      | 2.410547      | 2.335088      | 2.410547      | 2.410547      | 2.335088      | 2.410547      | 2.493947      | 2.493947      | 2.493947      | 2.493947      |
| FTC 238      | 2.610295      | 2.606884      | 2.606884      | 2.594289      | 2.51256       | 2.395743      | 2.489348      | 2.508995      | 2.508995      | 2.508995      | 2.508995      |
| HuGCT1       | 2.395441      | 2.325194      | 2.325194      | 2.436273      | 2.631828      | 2.325194      | 2.325194      | 2.437847      | 2.31344       | 2.31344       | 2.31344       |
| HOS          | 2.608765      | 2.608765      | 2.608765      | 2.452018      | 2.340132      | 2.318935      | 2.340132      | 2.340132      | 2.340132      | 2.318935      | 2.318935      |
| NCI-H2170    | 2.672121      | 2.672121      | 2.672121      | 2.672121      | 2.61579       | 2.55905       | 2.61579       | 2.55905       | 2.446388      | 2.446388      | 2.446388      |
| Hs 936.T     | 2.618352      | 2.618352      | 2.600353      | 2.593232      | 2.583749      | 2.518533      | 2.583749      | 2.567737      | 2.518533      | 2.518533      | 2.484876      |
| NCI-H1793    | 2.59349       | 2.539945      | 2.59349       | 2.59349       | 2.59349       | 2.723548      | 2.723548      | 2.539945      | 2.519979      | 2.519979      | 2.519979      |
| MRK-nu-1     | 2.468905      | 2.360398      | 2.492123      | 2.692303      | 2.708588      | 2.708588      | 2.708588      | 2.413086      | 2.286447      | 2.286447      | 2.286447      |
| KHOS-312H    | 2.708284      | 2.350692      | 2.350692      | 2.350692      | 2.350692      | 2.350692      | 2.390015      | 2.277249      | 2.277249      | 2.277249      | 2.277249      |
| LCLC-103H    | 2.469591      | 2.318974      | 2.222316      | 2.318974      | 2.318974      | 2.222316      | 2.265022      | 2.222316      | 2.222316      | 2.222316      | 2.222316      |
| H69V         | 2.367341      | 2.367341      | 2.869176      | 2.464241      | 2.464241      | 2.431481      | 2.43786       | 2.43786       | 2.431481      | 2.431481      | 2.431481      |
| GCT          | 2.558752      | 2.558752      | 2.619295      | 2.619295      | 2.654558      | 2.558752      | 2.558752      | 2.320782      | 2.269506      | 2.269506      | 2.236108      |
| COLO 857     | 2.537048      | 2.460258      | 2.37975       | 2.37975       | 2.354369      | 2.268968      | 2.354369      | 2.354369      | 2.354369      | 2.354369      | 2.354369      |
| RERF-LC-MS   | 2.415786      | 2.390695      | 2.140779      | 2.390695      | 2.390695      | 2.390695      | 2.390695      | 2.390695      | 2.390695      | 2.390695      | 2.365385      |
| MKN7         | 2.514021      | 2.378068      | 2.403268      | 2.514021      | 2.632291      | 2.585563      | 2.585563      | 2.403268      | 2.403268      | 2.403268      | 2.403268      |
| A-427        | 2.427491      | 1.903787      | 1.903787      | 2.640033      | 2.677077      | 1.903787      | 1.64727       | 1.64727       | 1.64727       | 1.64727       | 1.762107      |
| T47D         | 2.503281      | 2.465653      | 2.503281      | 2.503281      | 2.520774      | 2.465653      | 2.520774      | 2.520774      | 2.520774      | 2.586611      | 2.602215      |
| BT-483       | 2.621227      | 2.550729      | 2.600482      | 2.550729      | 2.550729      | 2.46386       | 2.488228      | 2.488228      | 2.46386       | 2.488228      | 2.488228      |
| SKN          | 2.437785      | 2.437785      | 2.437785      | 2.437785      | 2.437785      | 2.369538      | 2.369538      | 1.822156      | 1.780613      | 1.780613      | 1.780613      |
| HCC202       | 2.631492      | 2.536665      | 2.536665      | 2.252571      | 2.252571      | 2.219831      | 2.252571      | 2.252571      | 2.219831      | 2.219831      | 2.252571      |
| OCUM-1       | 2.378068      | 2.378068      | 2.378068      | 2.44066       | 2.44066       | 2.44066       | 2.44066       | 2.44066       | 2.44066       | 2.44066       | 2.44066       |
| NCI-H2122    | 2.213728      | 2.213728      | 2.213728      | 2.213728      | 2.53476       | 2.53476       | 2.53476       | 2.414186      | 2.22956       | 2.22956       | 2.22956       |
| HT 29        | 2.48307       | 2.522147      | 2.522147      | 2.522147      | 2.522147      | 2.48307       | 2.48307       | 2.48307       | 2.408332      | 2.408332      | 2.48307       |
| huH-1        | 2.307546      | 1.87764       | 1.87764       | 1.87764       | 1.87764       | 1.808159      | 1.774177      | 1.87764       | 2.066148      | 2.066148      | 2.066148      |
| HCC-15       | 2.338426      | 2.312185      | 2.312185      | 2.338426      | 2.341068      | 2.268889      | 2.552886      | 2.304055      | 2.304055      | 2.304055      | 2.304055      |
| KHOS-240S    | 2.568839      | 2.201754      | 2.201754      | 2.071783      | 2.071783      | 2.040556      | 2.071783      | 2.071783      | 2.040556      | 2.040556      | 2.040556      |
| JIMT-1       | 2.476718      | 2.146982      | 2.419418      | 2.419418      | 2.419418      | 2.146982      | 2.03305       | 2.219697      | 2.147805      | 2.147805      | 2.19723       |
| KON          | 2.266351      | 2.266351      | 2.465788      | 2.465788      | 2.56183       | 1.981329      | 1.981329      | 1.85467       | 1.640333      | 1.640333      | 1.85467       |
| COLO 853     | 2.327113      | 2.124907      | 2.124907      | 2.21646       | 2.21646       | 2.124907      | 2.21646       | 2.253919      | 2.298154      | 2.298154      | 2.253919      |
| U-2 OS       | 2.365385      | 2.248656      | 2.248656      | 2.261862      | 2.365385      | 2.365385      | 2.365385      | 2.365385      | 2.314087      | 2.314087      | 2.261862      |
| ME-180       | 1.8093        | 1.78052       | 1.8093        | 1.8093        | 1.8093        | 1.78052       | 1.571051      | 1.571051      | 1.900086      | 1.900086      | 1.900086      |

| ProbeSetID  | SNP_A-2082958 | SNP_A-1989999 | SNP_A-1989999 | SNP_A-1989999 | SNP_A-2099333 | SNP_A-4303186 | SNP_A-4246311 | SNP_A-4273285 | SNP_A-2183844 | SNP_A-4252184 | SNP_A-2234151 |
|-------------|---------------|---------------|---------------|---------------|---------------|---------------|---------------|---------------|---------------|---------------|---------------|
| Affy_SNP.ID | 6417094       | 2569063       | 2569064       | 2569066       | 6658895       | 9748516       | 10659347      | 5794037       | 7934783       | 11486260      | 8763615       |
| dbSNP       | rs4947984     | rs2075109     | rs2075110     | rs11506105    | rs11536635    | rs7781264     | rs2241055     | rs6968014     | rs845558      | rs845559      | rs7795728     |
| Chromosome  | 7             | 7             | 7             | 7             | 7             | 7             | 7             | 7             | 7             | 7             | 7             |
| Position    | 54985525      | 54993112      | 54993368      | 54994386      | 55003224      | 55005049      | 55014670      | 55021651      | 55021797      | 55022169      | 55024300      |
| Strand      | +             | +             | -             | -             | -             | -             | +             | +             | -             | +             | +             |
| Cytoband    | p11.2         |
| FU97        | 2.284592      | 2.201256      | 2.201256      | 2.201256      | 2.201256      | 2.159773      | 2.159773      | 2.159773      | 2.052679      | 2.052679      | 2.052679      |
| Calu-1      | 2.402741      | 2.093904      | 2.402741      | 2.402741      | 2.402741      | 2.093904      | 2.093904      | 2.093904      | 2.046113      | 2.046113      | 2.170006      |
| NCI-H2452   | 2.30473       | 2.204389      | 2.30473       | 2.204389      | 2.204389      | 2.204389      | 2.204389      | 2.30473       | 2.204389      | 2.204389      | 1.940146      |
| UMC-11      | 2.477794      | 2.477794      | 2.477794      | 2.428859      | 2.416248      | 2.330422      | 2.330422      | 2.198348      | 2.157616      | 2.138346      | 1.960387      |
| COLO 684    | 2.545086      | 2.545086      | 2.521798      | 2.478417      | 2.378156      | 2.099731      | 2.212563      | 2.212563      | 2.212563      | 2.212563      | 2.212563      |
| SVts-8      | 0.6438562     | 0.6438562     | 0.6668475     | 0.6668475     | 0.6668475     | 0.6668475     | 0.5737623     | 0.6668475     | 0.6668475     | 0.6668475     | 0.689657      |
| HEC-1       | 2.036841      | 2.003907      | 2.036841      | 2.446413      | 2.446413      | 2.036841      | 1.892309      | 2.320859      | 2.320859      | 2.320859      | 2.320859      |
| A-375       | 2.271043      | 1.985899      | 2.271043      | 2.271043      | 2.57368       | 1.848048      | 1.832082      | 1.832082      | 1.832082      | 1.832082      | 1.832082      |
| OUMS-23     | 2.382607      | 2.27216       | 2.382607      | 2.382607      | 2.396737      | 2.396737      | 2.396737      | 1.685491      | 1.685491      | 1.685491      | 1.685491      |
| EJ138       | 2.472704      | 2.451747      | 2.451747      | 2.300768      | 2.164656      | 2.107279      | 2.164656      | 2.164656      | 2.164656      | 2.164656      | 2.164656      |
| HO-1-u-1    | 2.379206      | 2.198119      | 2.379206      | 2.379206      | 2.403218      | 1.935813      | 1.776501      | 1.920771      | 1.689687      | 1.689687      | 1.689687      |
| HT55        | 2.308778      | 2.308778      | 2.471442      | 2.308778      | 2.243901      | 2.062254      | 2.243901      | 2.243901      | 2.062254      | 2.062254      | 2.243901      |
| NCI-H2347   | 2.347662      | 2.347662      | 2.398333      | 2.398333      | 2.398333      | 2.347662      | 2.522604      | 2.522604      | 2.337708      | 2.337708      | 1.940205      |
| REFR-LC-KJ  | 2.293402      | 2.237331      | 2.155088      | 2.155088      | 2.383365      | 2.205061      | 2.205061      | 2.205061      | 2.205061      | 2.205061      | 2.205061      |
| COR-L279    | 2.250257      | 2.147695      | 2.250257      | 2.250257      | 2.250257      | 2.147695      | 2.147695      | 2.136998      | 1.848489      | 1.848489      | 2.014118      |
| SW 1573     | 2.425039      | 2.136833      | 2.204362      | 2.204362      | 2.204362      | 1.761042      | 1.685443      | 1.891665      | 1.685443      | 1.685443      | 1.883685      |
| SW 900      | 2.315006      | 2.092242      | 2.092242      | 2.092242      | 2.489251      | 2.489251      | 2.489251      | 2.452733      | 2.092242      | 2.092242      | 2.034048      |
| HT 1376     | 2.226974      | 2.220285      | 2.220285      | 2.220285      | 2.159418      | 2.059429      | 2.019196      | 2.019196      | 2.019196      | 2.019196      | 2.059429      |
| HUP-T3      | 2.136007      | 1.887438      | 2.136007      | 2.136007      | 2.212563      | 1.779741      | 1.46426       | 1.539662      | 1.434263      | 1.434263      | 1.539662      |
| STC 1       | 2.390632      | 2.390632      | 2.077238      | 1.970534      | 2.077238      | 1.970534      | 2.077238      | 2.017892      | 1.970534      | 1.970534      | 1.922135      |
| NCI-H2286   | 2.389901      | 2.389901      | 2.389901      | 2.460455      | 2.460455      | 2.456837      | 2.460455      | 2.456837      | 2.389901      | 2.389901      | 2.110016      |
| VMRC-LCD    | 2.261862      | 2.222063      | 2.222063      | 2.222063      | 2.222063      | 2.181707      | 2.222063      | 2.222063      | 2.085289      | 2.085289      | 2             |
| H69AR       | 2.338336      | 2.338336      | 2.393642      | 2.393642      | 2.393642      | 2.338349      | 2.393642      | 2.393642      | 2.338349      | 2.338349      | 2.260438      |
| VMRC-LCP    | 2.019139      | 2.019139      | 2.091864      | 2.091864      | 2.324768      | 2.091864      | 2.091864      | 2.033007      | 1.831011      | 1.831011      | 1.831011      |
| FLYA13      | 2.303614      | 2.275807      | 2.303614      | 2.382418      | 2.405061      | 2.382418      | 2.382418      | 2.303614      | 2.023249      | 2.023249      | 1.931325      |
| HUP-T4      | 2.084266      | 1.859521      | 1.859521      | 1.859521      | 1.859521      | 1.756493      | 1.298753      | 1.859521      | 1.972064      | 1.972064      | 1.972064      |
| COR-L 105   | 2.172331      | 2.172331      | 2.172331      | 2.307818      | 2.172331      | 2.307818      | 2.398786      | 2.398786      | 2.132468      | 2.132468      | 2.123635      |
| KMRC-20     | 2.161029      | 2.12376       | 2.161029      | 2.161029      | 2.16531       | 2.161029      | 2.12376       | 2.161029      | 2.16531       | 2.16531       | 2.16531       |
| NCI-H2081   | 2.160811      | 2.125432      | 2.114277      | 2.114277      | 2.125432      | 2.114277      | 2.211008      | 2.211008      | 2.114277      | 2.114277      | 2.092801      |
| VM-CUB1     | 2.293832      | 2.293832      | 2.293832      | 2.228214      | 2.165746      | 2.165746      | 2.078375      | 2.165746      | 2.165746      | 2.012366      | 2.165746      |
| BU25 TK     | 2.266101      | 2.088858      | 2.266101      | 2.266101      | 2.29009       | 2.266101      | 2.282905      | 2.29009       | 2.282905      | 2.282905      | 2.282905      |
| RCM-1       | 2.142921      | 1.738195      | 1.738195      | 2.393843      | 2.706409      | 1.738195      | 1.459253      | 1.848869      | 1.842065      | 1.842065      | 1.842065      |
| NCI-H2172   | 2.341145      | 2.060305      | 2.060305      | 2.027139      | 2.060305      | 2.027139      | 2.333971      | 2.333971      | 2.230693      | 2.230693      | 2.230693      |
| SK-NEP-1    | 2.189648      | 2.182939      | 2.189648      | 2.189648      | 2.244683      | 2.182939      | 2.182939      | 1.941163      | 1.941163      | 1.941163      | 1.941163      |
| D1.1        | 2.334831      | 2.334831      | 2.366592      | 2.334831      | 2.334831      | 2.282225      | 2.282225      | 2.282225      | 2.281505      | 2.279843      | 2.281505      |
| NCI-H2196   | 2.191376      | 2.097839      | 2.097839      | 2.097839      | 2.097839      | 2.097839      | 2.140394      | 2.140394      | 2.140394      | 2.140394      | 2.140394      |
| NCI-H1435   | 2.360117      | 2.175835      | 2.175835      | 2.01706       | 2.01706       | 1.898427      | 2.01706       | 2.01706       | 1.898427      | 1.898427      | 1.875367      |
| GRANTA-519  | 2.192335      | 1.980893      | 1.980893      | 1.864773      | 1.864773      | 1.804641      | 1.804641      | 1.864773      | 1.804641      | 1.804641      | 1.804641      |
| SK-MES      | 2.148997      | 2.010786      | 1.966086      | 1.966086      | 1.966086      | 1.946091      | 1.966086      | 2.252717      | 2.0965        | 2.0965        | 2.0965        |
| NCI-H1437   | 1.980298      | 1.896708      | 1.980298      | 1.980298      | 1.980298      | 1.849036      | 1.980298      | 2.152078      | 2.152078      | 2.152078      | 2.248458      |
| BFTC-905    | 2.127475      | 2.113125      | 2.127475      | 2.127475      | 2.13069       | 2.13069       | 2.113125      | 2.243861      | 2.133832      | 2.133832      | 2.133832      |
| DMS 153     | 2.124008      | 2.09869       | 2.124008      | 2.227508      | 2.258751      | 2.258751      | 2.325928      | 2.325928      | 2.325928      | 2.296853      | 2.258751      |
| Detroit 562 | 2.261335      | 2.244285      | 2.244285      | 2.244285      | 2.243874      | 2.134727      | 2.134727      | 2.209197      | 2.134727      | 2.134727      | 2.134727      |
| RT4         | 2.145117      | 2.145117      | 2.150764      | 2.150764      | 2.150764      | 2.137438      | 2.069854      | 2.069854      | 1.959495      | 1.959495      | 1.959495      |
| 273T        | 2.42958       | 2.224973      | 2.403719      | 2.241182      | 2.224973      | 2.224973      | 2.118821      | 2.118821      | 1.980661      | 1.980661      | 2.118821      |
| SW 1463     | 2.051985      | 2.051985      | 2.051985      | 2.219791      | 2.173568      | 2.173568      | 2.213447      | 2.173568      | 2.173568      | 2.173568      | 2.148696      |
| H69         | 2.282643      | 2.143498      | 2.143498      | 2.282643      | 2.282643      | 2.282643      | 2.143498      | 2.302705      | 2.302705      | 2.156017      | 2.302705      |



| ProbeSetID      | SNP_A-2082958 | SNP_A-1989996 | SNP_A-1989996 | SNP_A-1989996 | SNP_A-209933 | SNP_A-4303186 | SNP_A-424631 | SNP_A-4273285 | SNP_A-218384 | SNP_A-4252184 | SNP_A-2234157 |
|-----------------|---------------|---------------|---------------|---------------|--------------|---------------|--------------|---------------|--------------|---------------|---------------|
| Affy_SNP.ID     | 6417094       | 2569063       | 2569064       | 2569066       | 6658895      | 9748516       | 10659347     | 5794037       | 7934783      | 11486260      | 8763615       |
| dbSNP           | rs4947984     | rs2075109     | rs2075110     | rs11506105    | rs11536635   | rs7781264     | rs2241055    | rs6968014     | rs845558     | rs845559      | rs7795728     |
| Chromosome      | 7             | 7             | 7             | 7             | 7            | 7             | 7            | 7             | 7            | 7             | 7             |
| Position        | 54985525      | 54993112      | 54993368      | 54994386      | 55003224     | 55005049      | 55014670     | 55021651      | 55021797     | 55022169      | 55024300      |
| Strand          | +             | +             | -             | -             | -            | -             | +            | +             | -            | +             | +             |
| Cytoband        | p11.2         | p11.2         | p11.2         | p11.2         | p11.2        | p11.2         | p11.2        | p11.2         | p11.2        | p11.2         | p11.2         |
| Hs 195.T        | 1.842141      | 1.839763      | 1.755441      | 1.842141      | 1.842141     | 1.755441      | 1.755441     | 1.842141      | 1.842141     | 1.842141      | 1.842141      |
| NCI-H1781       | 2.090858      | 2.171801      | 2.249503      | 2.282709      | 2.282709     | 2.282709      | 2.299546     | 2.299546      | 2.282709     | 2.282709      | 2.171801      |
| WDR             | 2.136172      | 2.145378      | 2.145378      | 2.148888      | 2.148888     | 2.160155      | 2.172046     | 2.162829      | 2.160155     | 2.112043      | 2.160155      |
| SK-MEL-1        | 2.283846      | 2.283846      | 2.374737      | 2.374737      | 2.407041     | 2.407041      | 2.407041     | 2.374737      | 2.207385     | 2.207385      | 2.177993      |
| SUIT-2          | 2.323079      | 1.83929       | 2.323079      | 2.35799       | 2.362192     | 2.362192      | 2.362192     | 1.794279      | 1.794279     | 1.794279      | 1.838055      |
| WPE1-NB26       | 1.954838      | 1.785342      | 1.781874      | 1.785342      | 1.785342     | 1.781874      | 1.781874     | 1.895594      | 1.74069      | 1.74069       | 1.761136      |
| HCC-78          | 2.075762      | 2.044111      | 1.971802      | 1.971802      | 1.971802     | 1.808575      | 1.971802     | 1.867009      | 1.867009     | 1.867009      | 1.867009      |
| A549            | 2.297192      | 2.297192      | 2.162666      | 2.162666      | 2.085975     | 1.867463      | 2.035032     | 2.035032      | 1.867463     | 1.867463      | 1.995698      |
| LK-2            | 2.101574      | 2.049802      | 1.90939       | 1.90939       | 1.90939      | 1.906426      | 1.8475       | 1.906426      | 1.906426     | 1.906426      | 1.906426      |
| NCI-H2330       | 1.994122      | 1.994122      | 2.059824      | 2.156509      | 2.059824     | 2.059824      | 2.156509     | 2.224546      | 2.156509     | 2.156509      | 2.156509      |
| COLO 685        | 2.197742      | 2.197742      | 2.197742      | 2.197742      | 2.072571     | 2.035944      | 2.035944     | 2.035944      | 1.894674     | 1.894674      | 1.907961      |
| BICR22          | 2.127751      | 2.065528      | 2.065528      | 2.065528      | 2.127751     | 2.127751      | 2.184063     | 2.289111      | 2.289111     | 2.289111      | 2.184063      |
| MEWO            | 2.143978      | 2.143978      | 2.198496      | 2.143978      | 2.198496     | 2.142468      | 2.142468     | 2.142468      | 2.005635     | 2.005635      | 2.005635      |
| IHH-4           | 2.063877      | 1.96667       | 2.063877      | 2.063877      | 2.063877     | 2.08407       | 1.452093     | 1.888173      | 1.888173     | 1.888173      | 2.100181      |
| NCI-N87         | 2.163416      | 2.137204      | 2.137204      | 2.137204      | 2.163416     | 2.247822      | 2.247822     | 2.247822      | 2.173119     | 2.173119      | 2.201538      |
| KYSE-410        | 2.176975      | 2.165909      | 2.134727      | 2.134727      | 2.134727     | 2.134727      | 2.134727     | 2.134727      | 1.860597     | 1.860597      | 2.064399      |
| DMS 92          | 2.044863      | 2.003677      | 2.044863      | 2.003677      | 2.003677     | 1.640382      | 1.640382     | 1.640382      | 1.640382     | 1.640382      | 1.640382      |
| RO82-WV-1       | 2.108461      | 2.108461      | 2.108461      | 2.191943      | 2.271661     | 2.271661      | 2.191943     | 2.010139      | 1.625309     | 1.625309      | 2.004411      |
| NCI-H82         | 2.372316      | 2.372316      | 2.294522      | 2.213983      | 2.213983     | 1.966903      | 1.966903     | 1.966903      | 1.787439     | 1.787439      | 1.966903      |
| C32             | 2.163402      | 2.163402      | 2.258698      | 2.163402      | 2.163402     | 1.72291       | 1.610156     | 1.610156      | 1.593611     | 1.593611      | 1.610156      |
| Hs 633T         | 2.063383      | 2.063383      | 2.132495      | 2.159405      | 2.321143     | 2.132495      | 2.132495     | 2.124078      | 2.104526     | 2.104526      | 2.104526      |
| NCI-H2405       | 2.219697      | 2.033506      | 2.033506      | 1.929167      | 1.929167     | 1.889522      | 1.802139     | 1.802139      | 1.802139     | 1.802139      | 1.889522      |
| Hs 895.T        | 2.058708      | 2.058708      | 2.058708      | 2.058708      | 2.058708     | 2.058708      | 2.092898     | 2.092898      | 2.058708     | 2.092898      | 2.04094       |
| MG 63           | 2.10312       | 2.0761        | 2.0761        | 2.0761        | 2.141685     | 2.0761        | 2.0761       | 2.141685      | 2.179905     | 2.0761        | 2.179905      |
| CAL-120         | 1.651636      | 1.480595      | 1.480595      | 1.651636      | 1.994527     | 1.441853      | 1.039667     | 1.441853      | 1.447204     | 1.447204      | 1.892219      |
| H33HJ-JA1       | 1.672042      | 1.788557      | 2.02641       | 2.02641       | 2.02641      | 2.0133        | 2.0133       | 2.006183      | 2.006183     | 2.006183      | 2.006183      |
| JSC-1           | 1.968114      | 1.968114      | 1.968114      | 1.968114      | 1.968114     | 1.794837      | 1.794837     | 1.794837      | 1.794837     | 1.794837      | 1.836162      |
| Hs 751.T        | 2.248312      | 2.248312      | 2.36148       | 2.36148       | 2.36148      | 2.36148       | 2.36148      | 2.251805      | 2.239629     | 2.239629      | 2.215215      |
| HMVII           | 2.1288        | 2.132688      | 2.150079      | 2.150079      | 2.150079     | 1.917002      | 1.917002     | 1.836803      | 1.594375     | 1.594375      | 1.72518       |
| fR2             | 2.124962      | 2.124962      | 2.130276      | 2.1316        | 2.137933     | 2.1316        | 2.042789     | 1.614545      | 1.582378     | 1.582378      | 1.614545      |
| COLO 201        | 2.03021       | 1.954926      | 1.939425      | 1.954926      | 1.954926     | 1.954926      | 1.939425     | 1.954926      | 1.874146     | 1.874146      | 1.874146      |
| NCI-H1915       | 1.986407      | 1.751246      | 1.751246      | 1.751246      | 1.751246     | 1.560419      | 1.502105     | 1.560419      | 1.560419     | 1.560419      | 1.751246      |
| IMR-90          | 1.981126      | 1.973535      | 1.981126      | 2.055101      | 2.117312     | 2.055101      | 2.055101     | 1.459358      | 1.459358     | 1.459358      | 1.459358      |
| RT112/84        | 1.952082      | 1.952082      | 2.004339      | 2.137314      | 2.137314     | 2.137314      | 2.137314     | 1.808945      | 1.739238     | 1.739238      | 1.560503      |
| Hs 894(E).Lu    | 1.985073      | 1.985073      | 1.985073      | 1.985073      | 2.077378     | 2.077378      | 2.105666     | 2.177572      | 2.077378     | 2.077378      | 2.077378      |
| LNcaP clone FGC | 2.016802      | 2.016802      | 2.119776      | 2.119776      | 2.172209     | 2.172209      | 2.160045     | 2.216045      | 2.216045     | 2.216045      | 2.119776      |
| NCI-H1581       | 1.994079      | 1.971875      | 1.971875      | 1.971875      | 1.971875     | 1.84785       | 1.828654     | 1.84785       | 1.828654     | 1.828654      | 1.84785       |
| HCT 116         | 2.103148      | 1.9972        | 1.9972        | 1.958602      | 1.9972       | 1.943562      | 1.943562     | 1.9972        | 2.071572     | 2.071572      | 1.967691      |
| Hs 228.T        | 1.981619      | 1.981619      | 1.981619      | 1.98191       | 1.98191      | 1.981619      | 1.98191      | 2.017834      | 1.971088     | 1.971088      | 1.944797      |
| JURKAT EC-1     | 2.125128      | 2.126757      | 2.126757      | 2.117409      | 2.117409     | 2.000563      | 2.000563     | 2.117409      | 2.117409     | 2.000563      | 2.117409      |
| SK-N-BE(2)      | 1.99298       | 1.99298       | 1.99298       | 1.99298       | 1.99298      | 1.99298       | 1.99298      | 2.096877      | 1.99298      | 1.99298       | 1.832189      |
| LS180           | 1.970126      | 1.937184      | 2.029767      | 2.029767      | 2.093401     | 2.029767      | 2.029767     | 2.029767      | 2.020786     | 2.020786      | 2.020786      |
| CAL-51          | 1.954091      | 1.767977      | 1.819224      | 1.819224      | 1.999697     | 1.819224      | 1.50411      | 1.819224      | 1.524272     | 1.524272      | 1.772086      |
| SKG-IIIb        | 1.808344      | 1.520135      | 1.520135      | 2.243026      | 2.243026     | 1.520135      | 1.350855     | 1.21404       | 1.213036     | 1.213036      | 1.21404       |
| P116 T          | 2.084434      | 2.084434      | 1.954208      | 1.938216      | 1.954208     | 1.938216      | 1.938216     | 1.938216      | 1.870482     | 1.870482      | 2.025981      |
| Hs 417.Lu       | 1.821619      | 1.821619      | 1.870512      | 1.870512      | 1.880845     | 1.880845      | 1.952229     | 2.173934      | 1.952229     | 1.952229      | 1.952229      |
| WIL2 NS         | 2.071417      | 1.986581      | 2.096361      | 2.096361      | 2.096361     | 2.096361      | 2.086241     | 2.086241      | 2.081925     | 2.081925      | 1.962288      |

| ProbeSetID  | SNP_A-2082958 | SNP_A-1989993 | SNP_A-1989994 | SNP_A-1989995 | SNP_A-2099333 | SNP_A-4303186 | SNP_A-4246311 | SNP_A-4273285 | SNP_A-2183844 | SNP_A-4252184 | SNP_A-2234151 |
|-------------|---------------|---------------|---------------|---------------|---------------|---------------|---------------|---------------|---------------|---------------|---------------|
| Affy_SNP.ID | 6417094       | 2569063       | 2569064       | 2569066       | 6658895       | 9748516       | 10659347      | 5794037       | 7934783       | 11486260      | 8763615       |
| dbSNP       | rs4947984     | rs2075109     | rs2075110     | rs11506105    | rs11536635    | rs7781264     | rs2241055     | rs6968014     | rs845558      | rs845559      | rs7795728     |
| Chromosome  | 7             | 7             | 7             | 7             | 7             | 7             | 7             | 7             | 7             | 7             | 7             |
| Position    | 54985525      | 54993112      | 54993368      | 54994386      | 55003224      | 55005049      | 55014670      | 55021651      | 55021797      | 55022169      | 55024300      |
| Strand      | +             | +             | -             | -             | -             | -             | +             | +             | -             | +             | +             |
| Cytoband    | p11.2         |
| COR-L95     | 2.081027      | 2.081027      | 2.081027      | 2.060291      | 2.060291      | 1.990549      | 2.060291      | 2.060291      | 2.037368      | 2.037368      | 2.060291      |
| SK-N-FI     | 2.050625      | 1.997373      | 1.997373      | 1.997373      | 1.997373      | 1.905447      | 1.997373      | 1.997373      | 1.774692      | 1.774692      | 1.750428      |
| WILCL       | 2.077982      | 2.085765      | 2.085765      | 2.085765      | 2.085765      | 2.193414      | 1.973637      | 1.973637      | 1.867493      | 1.867493      | 1.867493      |
| P32/ISH     | 1.894001      | 1.765302      | 1.765302      | 1.925379      | 2.003403      | 1.925379      | 1.925379      | 2.003403      | 1.986001      | 1.986001      | 1.986001      |
| EPLC-272H   | 2.009147      | 1.829573      | 1.979383      | 1.979383      | 1.979383      | 1.829573      | 1.610255      | 1.558065      | 1.50738       | 1.50738       | 1.610255      |
| A2780 ADR   | 2.037056      | 2.134438      | 2.134438      | 1.860218      | 1.860218      | 1.797051      | 1.797051      | 1.860218      | 1.786165      | 1.786165      | 1.786165      |
| C8166       | 2.062084      | 2.062084      | 2.206552      | 2.206552      | 2.063778      | 2.057591      | 2.057591      | 2.057591      | 1.97582       | 1.97582       | 1.97582       |
| Hs 908.T    | 2.117617      | 2.060333      | 2.060333      | 2.008255      | 2.008255      | 1.973244      | 2.008255      | 2.060333      | 2.008255      | 2.060333      | 1.988754      |
| NCI-H322    | 2.010742      | 2.010742      | 2.034404      | 2.034404      | 2.034404      | 2.012438      | 1.821527      | 1.821527      | 1.846024      | 1.846024      | 1.846024      |
| NCI-H1417   | 1.80098       | 2.335461      | 2.447525      | 2.447525      | 2.447525      | 2.335461      | 2.335461      | 2.1312        | 2.059316      | 1.80098       | 1.742315      |
| HBE4-E6/E7  | 1.810193      | 1.810193      | 1.829757      | 1.829757      | 1.921172      | 1.829757      | 1.829757      | 1.829757      | 1.805521      | 1.805521      | 1.805521      |
| NCI-H1522   | 2.205948      | 2.205948      | 2.022147      | 2.058284      | 1.946943      | 1.826985      | 1.67921       | 1.67921       | 1.391008      | 1.391008      | 1.67921       |
| LU99A       | 1.836772      | 1.836772      | 1.867145      | 1.941707      | 2.014391      | 1.941707      | 2.057138      | 2.057138      | 2.057138      | 2.057138      | 2.057138      |
| HCT-8       | 1.839107      | 1.743886      | 1.839107      | 1.839107      | 1.87377       | 1.613819      | 1.613819      | 1.87377       | 1.87377       | 1.949998      | 1.949998      |
| SBC-5       | 2.017031      | 2.017031      | 2.078263      | 2.078263      | 2.052538      | 2.052538      | 2.052538      | 2.052538      | 1.961557      | 1.961557      | 1.961557      |
| Ishikawa    | 1.963413      | 1.763846      | 1.763846      | 1.934573      | 1.934573      | 1.772242      | 1.772242      | 1.934573      | 1.934573      | 1.934573      | 1.972341      |
| U266B1      | 2.045446      | 2.045446      | 2.048909      | 2.048909      | 2.049136      | 2.048909      | 2.049136      | 2.049136      | 2.048909      | 2.048909      | 2.049136      |
| PA-TU-8988T | 1.947605      | 1.830369      | 1.947605      | 1.947605      | 2.033278      | 1.830369      | 1.830369      | 1.651734      | 1.651734      | 1.651734      | 1.651734      |
| HRT-18      | 1.910551      | 1.751686      | 1.950805      | 2.047547      | 2.117644      | 2.047547      | 1.751686      | 1.745358      | 1.668613      | 1.668613      | 1.668613      |
| C170        | 2.047206      | 2.045034      | 2.045034      | 1.932418      | 2.045034      | 1.932418      | 1.932418      | 2.045034      | 1.932418      | 1.932418      | 1.932418      |
| J GAMMA 1   | 1.905606      | 2.065147      | 2.151394      | 2.065147      | 2.065147      | 2.065147      | 2.044622      | 2.065147      | 2.065147      | 2.044622      | 2.065147      |
| LS174T      | 2.002466      | 1.994917      | 2.002466      | 2.071389      | 2.071389      | 2.002466      | 2.002466      | 2.071389      | 2.002466      | 2.002466      | 2.002466      |
| NCI-H526    | 1.861944      | 1.829007      | 1.861944      | 1.829007      | 1.829007      | 1.829007      | 1.829007      | 1.829007      | 1.829007      | 1.829007      | 1.930024      |
| HLE         | 2.149353      | 2.023206      | 2.023206      | 2.023206      | 2.023206      | 1.800331      | 1.486272      | 1.486272      | 1.486272      | 1.486272      | 1.617495      |
| 23132/87    | 1.727877      | 1.679919      | 1.61471       | 1.61471       | 1.61471       | 1.679919      | 1.61471       | 1.61471       | 1.598175      | 1.598175      | 1.61471       |
| Hs 834.T    | 1.806246      | 1.806246      | 1.838878      | 1.838878      | 1.806246      | 1.793009      | 1.793009      | 1.793009      | 1.739032      | 1.793009      | 1.793009      |
| Hs 891.T    | 1.86506       | 1.811472      | 1.800918      | 1.770352      | 1.770352      | 1.770352      | 1.811472      | 1.86506       | 1.811472      | 1.811472      | 1.810424      |
| Hs 839.T    | 1.770477      | 1.603029      | 1.770477      | 2.004872      | 2.039959      | 2.004872      | 2.004872      | 1.603029      | 1.166692      | 1.166692      | 1.166692      |
| SNU-1       | 1.955849      | 1.955849      | 1.934234      | 1.934234      | 1.934234      | 1.903161      | 1.835444      | 1.835444      | 1.903161      | 1.903161      | 1.960753      |
| EB1         | 1.839794      | 1.839794      | 1.863245      | 1.779975      | 1.863245      | 1.779975      | 1.8569        | 1.863245      | 1.863245      | 1.863245      | 2.052226      |
| NCI-H2009   | 1.865226      | 1.839123      | 1.839123      | 1.820222      | 1.820222      | 1.820222      | 1.839123      | 1.835337      | 1.820222      | 1.820222      | 1.78136       |
| NCI-H1048   | 1.897142      | 1.897142      | 1.897142      | 1.897142      | 2.025137      | 2.025137      | 2.025137      | 2.145817      | 1.822202      | 1.822202      | 1.770024      |
| A2780       | 1.986639      | 1.986639      | 1.986639      | 1.98053       | 1.972341      | 1.972341      | 1.972341      | 1.98053       | 1.972341      | 1.947913      | 1.947913      |
| NCI-H1666   | 1.61471       | 1.985537      | 1.985537      | 1.985537      | 1.985537      | 1.985537      | 1.985537      | 1.985537      | 1.985537      | 1.985537      | 1.985537      |
| G-402       | 1.845187      | 1.716121      | 1.845187      | 1.894943      | 2.050639      | 1.894943      | 1.894943      | 1.630052      | 1.622482      | 1.622482      | 1.630052      |
| JHH-7       | 1.763783      | 1.763783      | 1.763783      | 1.763783      | 1.849492      | 1.634166      | 1.280372      | 1.634166      | 1.280372      | 1.280372      | 1.661971      |
| OUS-11      | 1.880755      | 1.880755      | 1.880755      | 2.074708      | 2.111516      | 2.111516      | 2.111516      | 2.111516      | 2.095105      | 2.095105      | 1.688964      |
| AZ-521      | 1.973972      | 1.973972      | 2.033064      | 2.033064      | 1.973972      | 1.814335      | 1.814335      | 1.814335      | 1.814335      | 1.814335      | 1.793722      |
| K562/ADM    | 1.518499      | 1.45558       | 1.45558       | 2.000837      | 2.000837      | 1.45558       | 1.45558       | 1.45558       | 1.33344       | 1.33344       | 1.33344       |
| NCI-H889    | 1.928723      | 1.928723      | 1.942267      | 1.942267      | 1.942267      | 1.942267      | 1.972603      | 1.942267      | 1.910581      | 1.910581      | 1.828073      |
| OE19        | 2.039902      | 1.797794      | 1.797794      | 1.797794      | 1.797794      | 1.774473      | 1.774473      | 1.797794      | 1.797794      | 1.797794      | 1.797794      |
| HT 728.T    | 1.790419      | 1.790419      | 1.829267      | 1.829267      | 1.88089       | 1.829267      | 1.88089       | 1.88089       | 1.829267      | 1.829267      | 1.970593      |
| GA-10       | 1.928176      | 1.928176      | 1.928176      | 1.949998      | 2.031609      | 2.031609      | 1.949998      | 2.031609      | 2.031609      | 1.823199      | 1.98587       |
| Hs 737.T    | 1.962566      | 1.962566      | 1.962566      | 1.962566      | 1.962566      | 1.962566      | 1.962566      | 2.034404      | 2.034404      | 1.949191      | 1.949191      |
| NCI-H838    | 1.764003      | 1.764003      | 1.764003      | 1.758925      | 1.758925      | 1.713621      | 1.713621      | 1.713621      | 1.713621      | 1.713621      | 1.758925      |
| NCI-H1155   | 1.944371      | 1.775737      | 1.934957      | 1.775737      | 1.775737      | 1.704381      | 1.929477      | 1.929477      | 1.929477      | 1.929477      | 1.929477      |
| A2780cis    | 1.878769      | 1.721544      | 1.782278      | 1.782278      | 1.782278      | 1.721544      | 1.721544      | 1.763768      | 1.721544      | 1.721544      | 1.763768      |

| ProbeSetID                 | SNP_A-2082958 | SNP_A-1989996 | SNP_A-1989996 | SNP_A-1989996 | SNP_A-2099333 | SNP_A-4303186 | SNP_A-4246313 | SNP_A-4273285 | SNP_A-2183844 | SNP_A-4252184 | SNP_A-2234157 |
|----------------------------|---------------|---------------|---------------|---------------|---------------|---------------|---------------|---------------|---------------|---------------|---------------|
| Affy_SNP.ID                | 6417094       | 2569063       | 2569064       | 2569066       | 6658895       | 9748516       | 10659347      | 5794037       | 7934783       | 11486260      | 8763615       |
| dbSNP                      | rs4947984     | rs2075109     | rs2075110     | rs11506105    | rs11536635    | rs7781264     | rs2241055     | rs6968014     | rs845558      | rs845559      | rs7795728     |
| Chromosome                 | 7             | 7             | 7             | 7             | 7             | 7             | 7             | 7             | 7             | 7             | 7             |
| Position                   | 54985525      | 54993112      | 54993368      | 54994386      | 55003224      | 55005049      | 55014670      | 55021651      | 55021797      | 55022169      | 55024300      |
| Strand                     | +             | +             | -             | -             | -             | -             | +             | +             | -             | +             | +             |
| Cytoband                   | p11.2         |
| G-401                      | 1.81907       | 1.817672      | 1.817672      | 1.817672      | 1.828823      | 1.817672      | 1.751922      | 1.593395      | 1.526313      | 1.526313      | 1.593395      |
| MS-1-L                     | 1.924802      | 1.841059      | 1.924802      | 1.941045      | 1.941045      | 1.642375      | 1.58909       | 1.58909       | 1.58909       | 1.58909       | 1.638846      |
| Hs 746T                    | 2.204873      | 2.204873      | 2.138744      | 2.066825      | 2.066825      | 1.969222      | 1.969222      | 1.932551      | 1.682223      | 1.682223      | 1.641836      |
| SW 13                      | 1.783196      | 1.783196      | 1.948559      | 1.948559      | 1.957504      | 1.948559      | 1.948559      | 1.948559      | 1.948559      | 1.948559      | 1.948559      |
| AGS                        | 1.846831      | 1.846831      | 1.947164      | 1.947164      | 1.846831      | 1.837643      | 1.837643      | 1.837643      | 1.835276      | 1.835276      | 1.772757      |
| NCI-H2171                  | 1.75585       | 1.705756      | 1.75585       | 1.705756      | 1.767414      | 1.767414      | 1.997936      | 1.997936      | 1.767414      | 1.767414      | 1.705756      |
| Hs 573.T                   | 1.715373      | 1.715373      | 1.715373      | 1.809099      | 1.715373      | 1.715373      | 1.715373      | 1.809099      | 1.715373      | 1.715373      | 1.715373      |
| HT1080                     | 1.986508      | 1.986508      | 1.986508      | 1.865332      | 1.986508      | 1.816381      | 1.816381      | 1.816381      | 1.816381      | 1.739348      | 1.816381      |
| COR-L 23/CPR               | 1.776189      | 1.776189      | 1.843528      | 1.843528      | 1.918754      | 1.843528      | 1.654175      | 1.843528      | 1.843528      | 1.843528      | 1.875111      |
| HGC-27                     | 1.761355      | 1.761355      | 1.785761      | 1.923706      | 1.923706      | 1.785761      | 1.615122      | 1.731732      | 1.52983       | 1.52983       | 1.601522      |
| SBC-3                      | 1.801166      | 1.801166      | 1.801166      | 1.93826       | 1.93826       | 1.93826       | 1.93826       | 1.93826       | 1.924757      | 1.924757      | 1.81675       |
| COLO 792                   | 1.892893      | 1.771931      | 1.892893      | 1.892893      | 1.892893      | 1.677516      | 1.484478      | 1.484478      | 1.484478      | 1.484478      | 1.677516      |
| H-EMC-SS                   | 1.823506      | 1.719494      | 1.719494      | 1.823506      | 1.912559      | 1.719494      | 1.719494      | 1.719494      | 1.507312      | 1.507312      | 1.502876      |
| J82                        | 1.626425      | 1.407796      | 1.407796      | 1.965283      | 2.17536       | 1.407796      | 1.11728       | 1.139138      | 1.139138      | 1.139138      | 1.433789      |
| Hs 600.T                   | 1.784564      | 1.784564      | 1.784564      | 1.963369      | 2.002754      | 1.963369      | 2.002754      | 1.963369      | 1.963369      | 1.963369      | 1.878814      |
| Hs 781.T                   | 1.748382      | 1.698541      | 1.748382      | 1.748382      | 2.115358      | 2.115358      | 2.115358      | 2.09597       | 1.698541      | 1.698541      | 1.490337      |
| BPH-1                      | 2.244272      | 2.244272      | 2.244272      | 2.020815      | 1.894345      | 1.894345      | 2.020815      | 2.020815      | 1.894345      | 1.894345      | 1.827414      |
| COR-L23                    | 1.759082      | 1.735192      | 1.735192      | 1.735192      | 1.892174      | 1.561057      | 1.878047      | 1.696891      | 1.696891      | 1.696891      | 1.637717      |
| A673                       | 1.827812      | 1.827812      | 1.865483      | 1.886627      | 1.908259      | 1.886627      | 1.908259      | 1.916587      | 1.908259      | 1.908259      | 1.916587      |
| COLO 205                   | 1.884661      | 1.682771      | 2.025366      | 2.025366      | 2.025366      | 1.985406      | 1.635099      | 1.852166      | 1.849826      | 1.849826      | 1.849826      |
| RMG-I                      | 1.737184      | 1.438314      | 1.758486      | 2.040656      | 2.040656      | 2.040656      | 2.040656      | 1.431506      | 1.312974      | 1.312974      | 1.312974      |
| WI-26 VA4                  | 1.783087      | 1.713541      | 1.783087      | 1.783087      | 1.8475        | 1.726973      | 1.726973      | 1.726973      | 1.726973      | 1.726973      | 1.8475        |
| Eos-HL-60                  | 1.760023      | 1.705468      | 1.760023      | 1.796386      | 1.858641      | 1.760023      | 1.705468      | 1.705468      | 1.705468      | 1.705468      | 1.730191      |
| GP5D                       | 1.899757      | 1.95283       | 1.899757      | 1.899757      | 1.95283       | 1.899757      | 1.895243      | 1.895243      | 1.895243      | 1.85253       | 1.85253       |
| MES-SA/Dx-5                | 1.874252      | 1.800223      | 1.757404      | 1.757404      | 1.72794       | 1.711007      | 1.651571      | 1.651571      | 1.651571      | 1.651571      | 1.651571      |
| SBC-2                      | 1.959275      | 1.959275      | 2.043841      | 1.98024       | 1.959275      | 1.98024       | 1.98024       | 1.959275      | 1.901041      | 1.901041      | 1.845355      |
| MCAS                       | 1.439734      | 1.374175      | 1.374175      | 1.374175      | 1.374175      | 1.217486      | 1.217486      | 1.217486      | 1.229853      | 1.229853      | 1.229853      |
| Ishikawa (Heraklio) 02 ER- | 1.994195      | 1.994195      | 2.05326       | 1.994195      | 1.994195      | 1.666995      | 1.511108      | 1.511108      | 1.511108      | 1.511108      | 1.598722      |
| MOLT-4F                    | 1.186421      | 1.186421      | 1.186421      | 1.34409       | 1.423201      | 1.186421      | 1.186421      | 1.328055      | 1.328055      | 1.328055      | 1.328055      |
| HARA                       | 1.602715      | 1.55086       | 1.55086       | 1.602715      | 1.786491      | 1.55086       | 1.828838      | 1.839077      | 1.828838      | 1.828838      | 1.828838      |
| NCI-H1944                  | 1.711629      | 1.422761      | 1.422761      | 1.422761      | 1.711629      | 1.422761      | 1.419957      | 1.419957      | 1.419957      | 1.419957      | 1.422761      |
| BICR 31                    | 1.771196      | 1.771196      | 1.771196      | 1.784285      | 1.795813      | 1.784285      | 1.795813      | 1.820084      | 1.820084      | 1.820084      | 1.834161      |
| D341 Med                   | 1.840297      | 1.846435      | 1.86155       | 1.846435      | 1.86155       | 1.67146       | 1.67146       | 1.704237      | 1.573611      | 1.704237      | 1.86155       |
| KHM-3S                     | 1.37396       | 1.37396       | 2.211611      | 2.211611      | 2.211611      | 1.374014      | 1.478763      | 1.830353      | 1.478763      | 1.478763      | 1.593262      |
| COR-L88                    | 1.577822      | 1.788572      | 1.788572      | 1.788572      | 1.825085      | 1.788572      | 1.788572      | 1.881687      | 1.881687      | 1.881687      | 1.818932      |
| NCI-H358                   | 1.786631      | 1.652141      | 1.786631      | 1.652141      | 1.652141      | 1.548313      | 1.507089      | 1.548313      | 1.535903      | 1.535903      | 1.535903      |
| 1321N                      | 1.647857      | 1.647857      | 1.647857      | 1.734085      | 1.785668      | 1.785668      | 1.734085      | 1.647857      | 1.520919      | 1.520919      | 1.413247      |
| KYSE-510                   | 1.717203      | 1.717203      | 1.904876      | 1.598059      | 1.598059      | 1.598059      | 1.598059      | 1.598059      | 1.582295      | 1.582295      | 1.582295      |
| TCO-1                      | 1.365812      | 1.365812      | 1.717426      | 1.717426      | 1.717426      | 1.34771       | 1.143509      | 1.151322      | 1.151322      | 1.151322      | 1.432718      |
| NCI-H441                   | 1.776251      | 1.776251      | 1.844426      | 1.844426      | 1.844426      | 1.692289      | 1.692289      | 1.692289      | 1.525735      | 1.525735      | 1.525735      |
| SNU-398                    | 1.528998      | 1.528998      | 1.593063      | 1.644383      | 1.656516      | 1.644383      | 1.644383      | 1.593063      | 1.546896      | 1.546896      | 1.544988      |
| NCI-H1299                  | 1.50363       | 1.455492      | 1.50363       | 1.515344      | 1.515344      | 1.50363       | 1.50363       | 1.515344      | 1.50363       | 1.50363       | 1.515344      |
| ASH-3                      | 1.3333496     | 1.2063767     | 1.3333496     | 1.3333496     | 1.3502046     | 1.3333496     | 0.968895      | 0.968895      | 0.6361593     | 0.6361593     | 0.9018576     |
| MCF7                       | 1.150625      | 1.131194      | 1.131194      | 1.131194      | 1.131194      | 1.111632      | 1.111632      | 1.111632      | 1.111632      | 1.111632      | 1.111632      |
| SKOV3                      | 0.7176477     | 0.7347421     | 0.7764232     | 0.7347421     | 0.8286913     | 0.7347421     | 0.7176477     | 0.7347421     | 0.7347421     | 0.7293017     | 0.7347421     |
| ChaGo-K-1                  | 0.7397704     | 0.7397704     | 1.2019286     | 1.2019286     | 1.3197395     | 1.3197395     | 0.7397704     | 0.7397704     | 0.7397704     | 0.7397704     | 1.1272925     |
| A373 C6                    | 1.0501332     | 1.0501332     | 1.0501332     | 0.869123      | 0.869123      | 0.7096039     | 0.7096039     | 0.8517779     | 0.8517779     | 0.7096039     | 0.8517779     |

| ProbeSetID         | SNP_A-208295 | SNP_A-198999 | SNP_A-198999 | SNP_A-198999 | SNP_A-209933 | SNP_A-430318 | SNP_A-424631 | SNP_A-427328 | SNP_A-218384 | SNP_A-425218 | SNP_A-223415 |
|--------------------|--------------|--------------|--------------|--------------|--------------|--------------|--------------|--------------|--------------|--------------|--------------|
| <b>Affy.SNP.ID</b> | 6417094      | 2569063      | 2569064      | 2569066      | 6658895      | 9748516      | 10659347     | 5794037      | 7934783      | 11486260     | 8763615      |
| <b>dbSNP</b>       | rs4947984    | rs2075109    | rs2075110    | rs11506105   | rs11536635   | rs7781264    | rs2241055    | rs6968014    | rs845558     | rs845559     | rs7795728    |
| <b>Chromosome</b>  | 7            | 7            | 7            | 7            | 7            | 7            | 7            | 7            | 7            | 7            | 7            |
| <b>Position</b>    | 54985525     | 54993112     | 54993368     | 54994386     | 55003224     | 55005049     | 55014670     | 55021651     | 55021797     | 55022169     | 55024300     |
| <b>Strand</b>      | +            | +            | -            | -            | -            | -            | +            | +            | -            | +            | +            |
| <b>Cytoband</b>    | p11.2        |
| MES-SA             | 0.6483078    | 0.7352789    | 0.7352789    | 0.7352789    | 0.7512244    | 0.7512244    | 0.7512244    | 0.7512244    | 0.7512244    | 0.7512244    | 0.7540253    |
| OAW28              | 0.7357038    | 0.727912     | 0.7357038    | 0.7357038    | 0.8646361    | 0.7357038    | 0.727912     | 0.727912     | 0.4894576    | 0.4894576    | 0.4894576    |
| NCI-H460           | 0.6484461    | 0.7269926    | 0.8016441    | 0.8016441    | 0.8345223    | 0.8016441    | 0.4878499    | 0.6580405    | 0.4878499    | 0.4878499    | 0.6580405    |



















| ProbeSetID    | SNP_A-1942958 | SNP_A-2108798 | SNP_A-2278627 | SNP_A-1932698 | SNP_A-1789168 | SNP_A-2267510 | SNP_A-1894491 |
|---------------|---------------|---------------|---------------|---------------|---------------|---------------|---------------|
| Affy.SNP.ID   | 12448814      | 6811344       | 9418599       | 12306602      | 10155780      | 9252596       | 11748262      |
| dbSNP         | rs7795743     | rs6593210     | rs6970262     | rs17518446    | rs2293348     | rs10269512    | rs2293347     |
| Chromosome    | 7             | 7             | 7             | 7             | 7             | 7             | 7             |
| Position      | 55024339      | 55028395      | 55033972      | 55037176      | 55040966      | 55041369      | 55043125      |
| Strand        | -             | -             | +             | +             | +             | +             | +             |
| Cytoband      | p11.2         |
| KYSE-520      | 6.541713      | 6.541713      | 6.750218      | 6.750218      | 6.541713      | 6.541713      | 6.411673      |
| OE21          | 6.425512      | 6.425512      | 6.548302      | 6.425512      | 6.392043      | 6.298607      | 6.219647      |
| H3255         | 6.111655      | 6.111655      | 6.135911      | 6.135911      | 6.135911      | 6.135911      | 6.111655      |
| NCI-H1573     | 5.705464      | 5.928978      | 5.937855      | 5.937855      | 6.13795       | 6.13795       | 5.928978      |
| HSC-2         | 5.273699      | 5.472184      | 5.472184      | 5.472184      | 5.472184      | 5.472184      | 5.273699      |
| HCC-827       | 5.01294       | 5.040266      | 5.33513       | 5.33513       | 5.33513       | 5.33513       | 5.093873      |
| Hs 852.T      | 5.603882      | 5.608417      | 5.608417      | 5.608417      | 5.76554       | 5.603882      | 5.513761      |
| KYSE-30       | 5.028042      | 5.055517      | 5.166432      | 5.166432      | 5.166432      | 5.166432      | 4.953463      |
| A431          | 4.322911      | 4.322911      | 4.362625      | 4.410616      | 4.410616      | 4.410616      | 4.362625      |
| BT-20         | 4.849844      | 5.006697      | 5.150625      | 5.150625      | 5.150625      | 5.006697      | 4.849844      |
| Ca9-22        | 3.862511      | 3.939181      | 4.317663      | 4.317663      | 4.464566      | 4.464566      | 4.464566      |
| NCI-H1568     | 4.168339      | 4.168339      | 4.112106      | 4.112106      | 4.044856      | 3.859537      | 3.84486       |
| PC-9          | 4.307727      | 4.307727      | 4.307727      | 4.307727      | 4.456492      | 4.307727      | 4.206566      |
| PNT1A         | 3.877783      | 3.877783      | 3.911622      | 3.911622      | 3.971824      | 3.971824      | 3.877783      |
| LUDLU-1       | 3.88201       | 3.88201       | 3.86236       | 3.86236       | 3.936454      | 3.893806      | 3.86236       |
| RERF-LC-MA    | 3.655638      | 3.775051      | 3.904667      | 3.904667      | 4.161315      | 4.161315      | 3.775051      |
| U373 MG       | 3.184345      | 3.089149      | 2.932795      | 2.932795      | 2.932795      | 3.116349      | 3.116349      |
| KYSE-450      | 3.971591      | 4.009916      | 4.009916      | 4.009916      | 4.203999      | 4.203999      | 4.115517      |
| KOSC-2 cl3-43 | 3.223591      | 3.266909      | 3.266909      | 3.266909      | 3.223591      | 3.223591      | 3.266909      |
| LU65          | 3.428992      | 3.428992      | 3.507654      | 3.507654      | 3.428992      | 3.398481      | 3.388789      |
| PC-14         | 3.476991      | 3.476991      | 3.476991      | 3.476991      | 3.522971      | 3.476991      | 3.388218      |
| NCI-H596      | 3.477121      | 3.631725      | 3.820114      | 3.820114      | 3.828509      | 3.820114      | 3.568589      |
| PC-3 [JPC-3]  | 3.647499      | 3.655638      | 3.711979      | 3.711979      | 3.711979      | 3.711979      | 3.711979      |
| 647-V         | 3.070951      | 3.113251      | 3.348126      | 3.348126      | 3.348126      | 3.348126      | 3.644922      |
| HSC-3         | 3.026608      | 3.083277      | 3.299672      | 3.299672      | 3.299672      | 3.299672      | 3.299672      |
| CASKI         | 3.593694      | 3.593694      | 3.590495      | 3.593694      | 3.700607      | 3.593694      | 3.590495      |
| JHH-4         | 3.023907      | 3.11823       | 3.11823       | 3.11823       | 3.11823       | 3.11823       | 3.11823       |
| CAL-85-1      | 2.800803      | 3.170723      | 3.170723      | 3.170723      | 3.170723      | 3.170723      | 3.248024      |
| BT-549        | 3.097396      | 3.097396      | 3.183837      | 3.183837      | 3.183837      | 3.183837      | 3.097396      |
| HSC-4         | 2.977606      | 3.347547      | 3.347547      | 3.347547      | 3.347547      | 3.347547      | 3.359685      |
| NUGC-4        | 3.101801      | 3.319849      | 3.479696      | 3.479696      | 3.479696      | 3.479696      | 3.479696      |
| BICR10        | 3.18014       | 3.367842      | 3.436105      | 3.436105      | 3.492273      | 3.50429       | 3.492273      |
| KYSE-140      | 3.296535      | 3.34572       | 3.52114       | 3.52114       | 3.525412      | 3.525412      | 3.52114       |
| SNU-5         | 3.120892      | 3.176976      | 3.238084      | 3.238084      | 3.293975      | 3.293975      | 3.238084      |
| SK-MEL-3      | 3.346054      | 3.346054      | 3.346054      | 3.346054      | 3.41406       | 3.346054      | 3.302025      |
| KYSE-180      | 3.298136      | 3.344869      | 3.298136      | 3.298136      | 3.475356      | 3.475356      | 3.336038      |
| PNT2          | 3.189804      | 3.189804      | 3.234785      | 3.321656      | 3.4784        | 3.4784        | 3.190368      |
| G-361         | 3.073389      | 3.073389      | 3.116153      | 3.116153      | 3.116153      | 3.08182       | 2.947491      |
| KYSE-220      | 3.291717      | 3.336992      | 3.336992      | 3.397895      | 3.397895      | 3.336992      | 3.283453      |
| WM-115        | 3.015894      | 3.015894      | 3.077434      | 3.077434      | 3.077434      | 3.098836      | 3.077434      |
| KYSE-50       | 3.03857       | 3.066828      | 3.066828      | 3.266165      | 3.266165      | 3.066828      | 3.03857       |
| OSC-20        | 2.432376      | 3.051196      | 3.051196      | 3.051196      | 3.051196      | 3.082574      | 3.082574      |

| ProbeSetID         | SNP_A-1942958 | SNP_A-2108798 | SNP_A-2278625 | SNP_A-1932698 | SNP_A-1789168 | SNP_A-2267510 | SNP_A-1894491 |
|--------------------|---------------|---------------|---------------|---------------|---------------|---------------|---------------|
| Affy_SNP.ID        | 12448814      | 6811344       | 9418599       | 12306602      | 10155780      | 9252596       | 11748262      |
| dbSNP              | rs7795743     | rs6593210     | rs6970262     | rs17518446    | rs2293348     | rs10269512    | rs2293347     |
| Chromosome         | 7             | 7             | 7             | 7             | 7             | 7             | 7             |
| Position           | 55024339      | 55028395      | 55033972      | 55037176      | 55040966      | 55041369      | 55043125      |
| Strand             | -             | -             | +             | +             | +             | +             | +             |
| Cytoband           | p11.2         |
| SAT                | 2.614624      | 2.676061      | 2.676061      | 2.676061      | 2.676061      | 2.798889      | 2.798889      |
| NCI-H1650          | 2.728585      | 2.793338      | 2.793338      | 2.793338      | 2.793338      | 3.033402      | 3.033402      |
| SK-CO-1            | 3.013955      | 3.013955      | 3.013955      | 3.013955      | 3.013955      | 3.095936      | 3.013955      |
| NCI-H1792          | 3.009861      | 3.009861      | 3.009861      | 3.009861      | 3.009861      | 3.234917      | 3.234917      |
| NCI-H1703          | 2.893624      | 2.893624      | 2.986434      | 2.986434      | 3.094199      | 3.094199      | 2.986434      |
| PCI 4B             | 2.971565      | 2.971565      | 3.107213      | 3.15257       | 3.178233      | 3.178233      | 3.15257       |
| NCI-H1563          | 2.555684      | 2.846403      | 2.87226       | 3.181664      | 3.181664      | 3.181664      | 3.181664      |
| NCI-H841           | 2.753814      | 2.79542       | 2.882085      | 2.882085      | 2.882085      | 2.922523      | 2.922523      |
| LOU-NH91           | 2.897802      | 2.98114       | 2.99139       | 2.99139       | 2.99139       | 2.99139       | 2.98114       |
| HuH-7              | 2.379725      | 3.270729      | 2.731956      | 2.731956      | 2.379725      | 2.416123      | 2.731956      |
| LC-1 sq            | 2.446536      | 2.565947      | 2.565947      | 2.565947      | 2.565947      | 2.565947      | 2.565947      |
| NCI-H522           | 2.78193       | 2.801644      | 2.802037      | 2.814618      | 2.814618      | 2.915157      | 2.915157      |
| 201T               | 2.609267      | 2.764925      | 2.847092      | 2.915693      | 3.02501       | 3.2021        | 3.2021        |
| G-292 Clone A141B1 | 2.868771      | 2.989528      | 2.989528      | 2.989528      | 3.022632      | 3.022632      | 3.022632      |
| RPMI-7951          | 2.878353      | 2.878353      | 2.878353      | 2.878353      | 3.127878      | 3.203298      | 3.203298      |
| BEN                | 2.876586      | 2.918863      | 2.970854      | 2.970854      | 2.970854      | 2.970854      | 2.918863      |
| NCI-H2228          | 2.613528      | 2.674109      | 2.674109      | 2.925508      | 3.175354      | 2.674109      | 2.627571      |
| HCC-44             | 2.455113      | 2.663089      | 2.882818      | 2.882818      | 2.663089      | 2.663089      | 2.455113      |
| NCI-H1734          | 3.045608      | 3.045608      | 3.058822      | 3.058822      | 2.75287       | 2.696374      | 2.693619      |
| YKG-1              | 2.431245      | 2.590012      | 2.590012      | 2.590012      | 2.590012      | 2.769647      | 2.769647      |
| MOG-G-CCM          | 2.8508        | 2.954609      | 2.971719      | 3.053239      | 3.053239      | 3.12277       | 3.053239      |
| SK-BR-3            | 2.757023      | 2.822852      | 2.855212      | 2.855212      | 2.855212      | 2.855212      | 2.822852      |
| COLO 858           | 2.916039      | 2.916039      | 2.916039      | 2.916039      | 2.996389      | 2.996389      | 2.916039      |
| SCC-4              | 2.185984      | 2.435504      | 2.435504      | 2.435504      | 2.435504      | 2.594535      | 2.697983      |
| TE7                | 2.498442      | 2.703754      | 2.703754      | 2.703754      | 2.703754      | 3.168338      | 3.168338      |
| NCI-H1755          | 2.623436      | 2.623436      | 2.623436      | 2.778252      | 2.778252      | 3.076361      | 2.778252      |
| CaR-1              | 2.724468      | 2.967637      | 2.967637      | 2.967637      | 2.967637      | 2.967637      | 2.967637      |
| OVISE              | 2.530334      | 2.714789      | 2.714789      | 2.714789      | 2.714789      | 2.714789      | 2.714789      |
| Calu-3             | 2.741489      | 2.741489      | 2.923078      | 2.923078      | 2.923078      | 2.923078      | 2.72247       |
| NCI-H1623          | 2.667981      | 2.766131      | 2.667981      | 2.766131      | 2.598267      | 2.766131      | 2.57433       |
| BICR 78            | 2.756535      | 2.782249      | 2.852669      | 2.950242      | 2.950242      | 3.069826      | 2.950242      |
| LS 123             | 2.324575      | 2.604931      | 2.604931      | 2.689975      | 2.689975      | 2.689975      | 2.566137      |
| AN3CA              | 2.673527      | 2.673527      | 2.673527      | 2.673527      | 2.673527      | 2.673527      | 2.673527      |
| 639-V              | 1.990462      | 2.53712       | 2.530298      | 2.530298      | 2.530298      | 2.530298      | 2.530298      |
| WM 266-4           | 2.480336      | 2.785745      | 2.785745      | 2.785745      | 2.480336      | 2.785745      | 2.480336      |
| SKN-3              | 2.250244      | 2.532985      | 2.744946      | 2.744946      | 2.250244      | 2.642794      | 2.642794      |
| NCI-H2085          | 2.79704       | 2.850295      | 2.850295      | 2.903862      | 2.903862      | 2.903862      | 2.850295      |
| RKN                | 2.063101      | 2.461623      | 2.461623      | 2.461623      | 2.461623      | 2.461623      | 2.782106      |
| MKN45              | 2.86907       | 2.86907       | 2.86907       | 2.86907       | 2.86907       | 2.902026      | 2.902026      |
| KHOS/NP            | 2.589447      | 2.651613      | 2.748688      | 2.771481      | 2.748688      | 2.772573      | 2.651613      |
| SNU-16             | 2.766308      | 2.780158      | 2.780158      | 2.848673      | 2.977904      | 2.977904      | 2.766308      |
| HCE7               | 2.292985      | 2.394863      | 2.448525      | 2.448525      | 2.448525      | 2.551707      | 2.630124      |
| OCUG-1             | 2.314269      | 2.952639      | 2.952639      | 2.952639      | 2.952639      | 2.952639      | 2.952639      |
| NL20-TA            | 2.601934      | 2.66247       | 2.668004      | 2.681307      | 2.758765      | 2.78248       | 2.78248       |
| KYSE-70            | 2.746283      | 2.806601      | 2.806601      | 2.806601      | 2.983142      | 2.983142      | 2.826907      |
| MOG-G-UVW          | 2.598888      | 2.734518      | 2.734518      | 2.734518      | 2.734518      | 2.734518      | 2.734518      |
| NCI-H2342          | 2.847511      | 2.847511      | 2.832199      | 2.832199      | 2.832199      | 2.832199      | 2.832199      |

| ProbeSetID         | SNP_A-1942958 | SNP_A-2108798 | SNP_A-2278625 | SNP_A-1932698 | SNP_A-1789168 | SNP_A-2267510 | SNP_A-1894491 |
|--------------------|---------------|---------------|---------------|---------------|---------------|---------------|---------------|
| Affy_SNP.ID        | 12448814      | 6811344       | 9418599       | 12306602      | 10155780      | 9252596       | 11748262      |
| dbSNP              | rs7795743     | rs6593210     | rs6970262     | rs17518446    | rs2293348     | rs10269512    | rs2293347     |
| Chromosome         | 7             | 7             | 7             | 7             | 7             | 7             | 7             |
| Position           | 55024339      | 55028395      | 55033972      | 55037176      | 55040966      | 55041369      | 55043125      |
| Strand             | -             | -             | +             | +             | +             | +             | +             |
| Cytoband           | p11.2         |
| ABC-1              | 2.723537      | 2.939772      | 2.96053       | 2.96053       | 3.062139      | 3.062139      | 3.062139      |
| NCI-H650           | 2.58833       | 2.58833       | 2.58833       | 2.58833       | 2.58833       | 2.611007      | 2.611007      |
| FTC 133            | 2.548702      | 2.569538      | 2.939084      | 2.943852      | 2.990019      | 2.990019      | 2.943852      |
| MDST8              | 2.636425      | 2.636425      | 2.741869      | 2.874178      | 2.9639        | 2.9639        | 2.894767      |
| KYSE-150           | 2.762855      | 2.830133      | 2.879597      | 2.879597      | 3.252738      | 3.252738      | 3.03435       |
| SW 48              | 2.67219       | 2.67219       | 2.759752      | 2.759752      | 2.851531      | 2.868931      | 2.868931      |
| NCI-H2023          | 2.564334      | 2.564334      | 2.564334      | 2.766441      | 2.85108       | 2.916501      | 2.916501      |
| COLO-680N          | 2.640357      | 2.663319      | 2.663319      | 2.663319      | 2.663319      | 2.750802      | 2.663319      |
| KP-4               | 2.048398      | 2.328633      | 2.328633      | 2.328633      | 2.328633      | 2.739983      | 2.739983      |
| SW-1710            | 2.437476      | 2.730691      | 2.730691      | 2.730691      | 2.705348      | 2.705348      | 2.705348      |
| KATO III           | 1.878288      | 1.890556      | 1.946576      | 2.307987      | 2.751491      | 2.769072      | 2.769072      |
| RERF-GC-1B         | 2.825715      | 2.825715      | 2.866517      | 2.866517      | 2.956567      | 2.956567      | 2.825715      |
| CAL-29             | 2.141685      | 2.706624      | 2.706624      | 2.706624      | 2.706624      | 2.706624      | 2.706624      |
| Sci-1              | 2.54205       | 2.544978      | 2.544978      | 2.544978      | 2.544978      | 2.544978      | 2.544978      |
| NCI-H810           | 2.472446      | 2.538342      | 2.653592      | 2.653592      | 2.653592      | 2.653592      | 2.59087       |
| T.Tn               | 2.523736      | 2.667878      | 2.667878      | 2.667878      | 2.779827      | 2.667878      | 2.523736      |
| DOK                | 2.655651      | 2.655651      | 2.6613        | 2.664442      | 2.781798      | 2.793481      | 2.781798      |
| COLO 741           | 2.609221      | 2.680281      | 2.680281      | 2.773798      | 2.807114      | 3.018834      | 3.018834      |
| NCI-H1651          | 2.354866      | 2.575299      | 2.805717      | 2.805717      | 2.575299      | 2.692359      | 2.692359      |
| RWPE-1             | 2.536462      | 2.768929      | 2.865427      | 2.865427      | 2.972986      | 2.972986      | 2.768929      |
| KYSE-270           | 2.448476      | 2.496037      | 2.542469      | 2.542469      | 2.542469      | 2.542469      | 2.542469      |
| NCI-H196           | 2.270952      | 2.303925      | 2.630657      | 2.748477      | 2.748477      | 2.748477      | 2.308259      |
| SK-LU-1            | 2.471319      | 2.531522      | 2.531522      | 2.720189      | 2.720189      | 2.531522      | 2.528556      |
| NCI-H1693 (ship16) | 2.479835      | 2.600704      | 2.600704      | 2.692768      | 2.692768      | 2.854966      | 2.854966      |
| NCI-H2135          | 2.630657      | 2.630657      | 2.609828      | 2.609828      | 2.609828      | 2.585234      | 2.503596      |
| VMRC-RCW           | 1.884856      | 2.27149       | 2.27149       | 2.35285       | 2.35285       | 2.488398      | 2.488398      |
| RERF-LC-Sq1        | 2.480897      | 2.759641      | 2.590541      | 2.590541      | 2.480897      | 2.480897      | 2.31313       |
| A375.S2            | 2.531246      | 2.531246      | 2.531246      | 2.498988      | 2.498988      | 2.498988      | 2.432239      |
| SW 1116            | 2.529397      | 2.529397      | 2.529397      | 2.714676      | 2.714676      | 2.729671      | 2.714676      |
| CAL-148            | 1.642784      | 2.092339      | 2.092339      | 2.092339      | 2.092339      | 2.156523      | 2.289268      |
| 22RV1              | 2.588024      | 2.727004      | 2.790992      | 2.848651      | 2.886184      | 2.896206      | 2.896206      |
| IM-95              | 2.74111       | 2.74111       | 2.74111       | 2.761736      | 2.761736      | 2.67307       | 2.620052      |
| HT 115             | 2.547736      | 2.547736      | 2.693744      | 2.700315      | 3.018601      | 3.018601      | 2.700315      |
| NCI-H727           | 2.339427      | 2.547115      | 2.547115      | 2.626979      | 2.626979      | 2.676438      | 2.676438      |
| T.T                | 2.718233      | 2.763563      | 2.718233      | 2.718233      | 2.718233      | 2.640253      | 2.516519      |
| OE33               | 2.559775      | 2.644722      | 2.672932      | 2.672932      | 2.672932      | 2.672932      | 2.644722      |
| PLC/PRF/5          | 2.42185       | 2.407918      | 2.70834       | 2.711645      | 2.70834       | 2.70834       | 2.70834       |
| SAS                | 2.345589      | 2.432885      | 2.432885      | 2.432885      | 2.432885      | 2.711081      | 2.850704      |
| MKN74              | 2.623959      | 2.652753      | 2.690032      | 2.706985      | 2.852733      | 2.852733      | 2.706985      |
| HMCB               | 2.776699      | 2.776699      | 2.610774      | 2.610774      | 2.514927      | 2.610774      | 2.514927      |
| A2058              | 2.016357      | 2.32992       | 2.016357      | 2.016357      | 2.016357      | 2.142441      | 2.142441      |
| HCC-366            | 2.205961      | 2.270019      | 2.270019      | 2.270019      | 2.270019      | 2.270019      | 2.270019      |
| P31/FUJ            | 2.434213      | 2.465395      | 2.465395      | 2.465395      | 2.465395      | 2.800507      | 2.800507      |
| SW 1417            | 2.448328      | 2.448328      | 2.448328      | 2.448328      | 2.328401      | 2.468635      | 2.328401      |
| KMRC-1             | 2.233142      | 2.365791      | 2.356371      | 2.356371      | 2.336617      | 2.336617      | 2.336617      |
| OAW42              | 2.346319      | 2.346319      | 2.540041      | 2.540041      | 2.761082      | 2.761082      | 2.688964      |
| PE/CA-PJ15         | 2.35957       | 2.436756      | 2.436756      | 2.436756      | 2.35957       | 2.35957       | 2.295291      |

| ProbeSetID   | SNP_A-1942958 | SNP_A-2108798 | SNP_A-2278627 | SNP_A-1932698 | SNP_A-1789168 | SNP_A-2267510 | SNP_A-1894491 |
|--------------|---------------|---------------|---------------|---------------|---------------|---------------|---------------|
| Affy_SNP.ID  | 12448814      | 6811344       | 9418599       | 12306602      | 10155780      | 9252596       | 11748262      |
| dbSNP        | rs7795743     | rs6593210     | rs6970262     | rs17518446    | rs2293348     | rs10269512    | rs2293347     |
| Chromosome   | 7             | 7             | 7             | 7             | 7             | 7             | 7             |
| Position     | 55024339      | 55028395      | 55033972      | 55037176      | 55040966      | 55041369      | 55043125      |
| Strand       | -             | -             | +             | +             | +             | +             | +             |
| Cytoband     | p11.2         |
| NUGC-3       | 2.560321      | 2.581828      | 2.581828      | 2.712795      | 2.791442      | 2.935665      | 2.935665      |
| DMS 273      | 2.353233      | 2.441353      | 2.559299      | 2.559299      | 2.646371      | 2.68338       | 2.68338       |
| MKN1         | 2.503256      | 2.510723      | 2.510723      | 2.510723      | 2.510723      | 2.619563      | 2.619563      |
| RERF-LC-Ad2  | 2.522424      | 2.645783      | 2.645783      | 2.778418      | 2.778418      | 2.883594      | 2.883594      |
| TASK1        | 1.985566      | 2.051985      | 2.051985      | 2.051985      | 2.051985      | 2.110627      | 2.110627      |
| NCI-H23      | 2.414686      | 2.426184      | 2.414686      | 2.414686      | 2.382569      | 2.414686      | 2.414686      |
| KP-1N        | 2.062621      | 2.258487      | 2.258487      | 2.080368      | 2.080368      | 2.258487      | 2.43662       |
| NCI-H711     | 2.329148      | 2.403418      | 2.583997      | 2.583997      | 2.583997      | 2.619819      | 2.619819      |
| NCI-H661     | 2.382443      | 2.587741      | 2.541799      | 2.541799      | 2.382443      | 2.4056        | 2.382443      |
| EBC-1        | 2.465322      | 2.609022      | 2.655375      | 2.655375      | 2.655375      | 2.609022      | 2.465322      |
| JHH-6        | 2.054832      | 2.135456      | 2.135456      | 2.135456      | 2.135456      | 2.135456      | 2.33311       |
| NB69         | 2.335551      | 2.396158      | 2.589271      | 2.589271      | 2.589271      | 2.396158      | 2.448982      |
| SR           | 2.462951      | 2.50236       | 2.50236       | 2.616104      | 2.50236       | 2.550419      | 2.50236       |
| T84          | 2.566326      | 2.566326      | 2.613213      | 2.708385      | 2.708385      | 2.708385      | 2.732359      |
| HO-1-N-1     | 1.712729      | 1.8454        | 1.8454        | 1.8454        | 1.8454        | 1.8454        | 1.978816      |
| BALL-1       | 2.368865      | 2.602836      | 2.602836      | 2.602836      | 2.602836      | 2.602836      | 2.602836      |
| Nthy-ori 3-1 | 2.493947      | 2.530838      | 2.530838      | 2.530838      | 2.530838      | 2.558741      | 2.558741      |
| FTC 238      | 2.489348      | 2.508995      | 2.51256       | 2.51256       | 2.55635       | 2.610015      | 2.672418      |
| HuCCT1       | 2.31344       | 2.437847      | 2.437847      | 2.437847      | 2.31344       | 2.31344       | 2.437847      |
| HOS          | 2.318935      | 2.318935      | 2.349989      | 2.395869      | 2.585245      | 2.685439      | 2.585245      |
| NCI-H2170    | 2.446388      | 2.446388      | 2.446388      | 2.446388      | 2.446388      | 2.517785      | 2.517785      |
| Hs 936.T     | 2.484876      | 2.484876      | 2.518533      | 2.532458      | 2.567737      | 2.682047      | 2.567737      |
| NCI-H1793    | 2.511014      | 2.519979      | 2.519979      | 2.691372      | 2.691372      | 2.556612      | 2.556612      |
| MRK-nu-1     | 2.286447      | 2.413086      | 2.413086      | 2.413086      | 2.413086      | 2.413086      | 2.475091      |
| KHOS-312H    | 2.239629      | 2.277249      | 2.390015      | 2.45728       | 2.45728       | 2.597364      | 2.597364      |
| LCLC-103H    | 2.222316      | 2.265022      | 2.327538      | 2.327538      | 2.327538      | 2.327538      | 2.327538      |
| H69V         | 2.431481      | 2.43786       | 2.431481      | 2.430786      | 2.430786      | 2.41046       | 2.310255      |
| GCT          | 2.236108      | 2.236108      | 2.236108      | 2.269506      | 2.269506      | 2.320782      | 2.320782      |
| COLO 857     | 2.333804      | 2.354369      | 2.375079      | 2.375079      | 2.413311      | 2.413311      | 2.375079      |
| RERF-LC-MS   | 2.365385      | 2.514021      | 2.655375      | 2.723537      | 2.689657      | 2.689657      | 2.689657      |
| MKN7         | 2.403268      | 2.573762      | 2.585563      | 2.585563      | 2.573762      | 2.248656      | 2.195222      |
| A-427        | 1.762107      | 2.207949      | 2.207949      | 1.908824      | 1.908824      | 2.007866      | 2.059711      |
| T47D         | 2.602215      | 2.66364       | 2.66364       | 2.679381      | 2.697972      | 2.697972      | 2.697972      |
| BT-483       | 2.488228      | 2.5445        | 2.488228      | 2.5445        | 2.5445        | 2.634654      | 2.634654      |
| SKN          | 1.780613      | 1.822156      | 1.822156      | 1.822156      | 1.822156      | 2.038009      | 2.038009      |
| HCC202       | 2.346588      | 2.353884      | 2.445795      | 2.649817      | 2.703087      | 2.7065        | 2.703087      |
| OCUM-1       | 2.44066       | 2.501923      | 2.538066      | 2.538066      | 2.538066      | 2.538066      | 2.538066      |
| NCI-H2122    | 2.22956       | 2.22956       | 2.22956       | 2.22956       | 2.22956       | 2.232357      | 2.22956       |
| HT 29        | 2.408332      | 2.408332      | 2.406803      | 2.3897        | 2.3897        | 2.341542      | 2.341542      |
| huH-1        | 2.066148      | 2.243304      | 2.243304      | 2.243304      | 2.243304      | 2.243304      | 2.358245      |
| HCC-15       | 2.304055      | 2.53157       | 2.53157       | 2.53157       | 2.506042      | 2.506042      | 2.304055      |
| KHOS-240S    | 2.201928      | 2.226694      | 2.270544      | 2.360932      | 2.360932      | 2.430102      | 2.430102      |
| JIMT-1       | 2.19723       | 2.219697      | 2.219697      | 2.219697      | 2.219697      | 2.219697      | 2.219697      |
| KON          | 1.85467       | 2.509611      | 2.509611      | 2.230133      | 2.230133      | 2.230133      | 2.230133      |
| COLO 853     | 2.298154      | 2.401611      | 2.487923      | 2.515252      | 2.52548       | 2.52548       | 2.487923      |
| U-2 OS       | 2.261862      | 2.314087      | 2.365385      | 2.365385      | 2.365385      | 2.314087      | 2.248656      |
| ME-180       | 1.900086      | 2.093513      | 2.093513      | 2.093513      | 2.093513      | 2.132771      | 2.254884      |



| ProbeSetID  | SNP_A-1942958 | SNP_A-2108798 | SNP_A-2278625 | SNP_A-1932698 | SNP_A-1789168 | SNP_A-2267510 | SNP_A-1894491 |
|-------------|---------------|---------------|---------------|---------------|---------------|---------------|---------------|
| Affy_SNP.ID | 12448814      | 6811344       | 9418599       | 12306602      | 10155780      | 9252596       | 11748262      |
| dbSNP       | rs7795743     | rs6593210     | rs6970262     | rs17518446    | rs2293348     | rs10269512    | rs2293347     |
| Chromosome  | 7             | 7             | 7             | 7             | 7             | 7             | 7             |
| Position    | 55024339      | 55028395      | 55033972      | 55037176      | 55040966      | 55041369      | 55043125      |
| Strand      | -             | -             | +             | +             | +             | +             | +             |
| Cytoband    | p11.2         |
| FU97        | 2.052679      | 2.159773      | 2.254738      | 2.254738      | 2.052679      | 2.052679      | 2.254738      |
| Calu-1      | 2.170006      | 2.170006      | 2.170006      | 2.170006      | 2.170006      | 2.284199      | 2.284199      |
| NCI-H2452   | 1.940146      | 2.212134      | 2.212134      | 2.254633      | 2.254633      | 2.254633      | 2.212134      |
| UMC-11      | 2.126688      | 2.096765      | 2.126688      | 2.096765      | 1.960387      | 1.960387      | 1.960387      |
| COLO 684    | 2.212563      | 2.378156      | 2.378156      | 2.378156      | 2.41071       | 2.41071       | 2.41071       |
| SVts-8      | 0.9501698     | 0.9501698     | 0.9501698     | 1.0117819     | 1.0117819     | 1.0117819     | 1.0919367     |
| HEC-1       | 2.320859      | 2.322098      | 2.322098      | 2.322098      | 2.322098      | 2.322098      | 2.389813      |
| A-375       | 1.832082      | 1.915903      | 1.915903      | 1.915903      | 1.915903      | 1.915903      | 2.216273      |
| OUMS-23     | 1.685491      | 1.931901      | 1.931901      | 1.931901      | 1.931901      | 2.110794      | 2.110794      |
| EJ138       | 2.164656      | 2.211356      | 2.268455      | 2.313764      | 2.405425      | 2.405425      | 2.382873      |
| HO-1-u-1    | 1.689687      | 1.920771      | 1.920771      | 1.920771      | 1.920771      | 1.967545      | 1.967545      |
| HT55        | 2.243901      | 2.243901      | 2.243901      | 2.243901      | 2.272868      | 2.329199      | 2.272868      |
| NCI-H2347   | 2.001399      | 2.388061      | 2.388061      | 2.388061      | 2.388061      | 2.388061      | 2.115455      |
| REFL-LC-KJ  | 2.205061      | 2.262099      | 2.306975      | 2.306975      | 2.262099      | 2.262099      | 2.262099      |
| COR-L279    | 2.014118      | 2.014118      | 2.014118      | 2.136998      | 2.136998      | 2.136998      | 2.136998      |
| SW 1573     | 1.883685      | 1.891665      | 1.891665      | 1.891665      | 1.891665      | 2.043755      | 2.221568      |
| SW 900      | 2.034048      | 2.281348      | 2.281348      | 2.281348      | 2.281348      | 2.281348      | 2.281348      |
| HT 1376     | 2.059429      | 2.118046      | 2.159418      | 2.241633      | 2.441143      | 2.441143      | 2.441143      |
| HUP-T3      | 1.539662      | 2.121769      | 2.121769      | 1.933909      | 1.933909      | 1.933909      | 2.121769      |
| STC 1       | 1.850844      | 1.970534      | 2.017892      | 2.273407      | 2.273407      | 2.273407      | 2.051163      |
| NCI-H2286   | 2.040044      | 2.456837      | 2.456837      | 2.456837      | 2.456837      | 2.373318      | 2.245054      |
| VMRC-LCD    | 2.085289      | 2.127006      | 2.181707      | 2.378068      | 2.378068      | 2.378068      | 2.378068      |
| H69AR       | 2.260438      | 2.260438      | 2.260438      | 2.338349      | 2.338349      | 2.385449      | 2.246644      |
| VMRC-LCP    | 1.831011      | 2.033007      | 2.033007      | 1.831011      | 1.831011      | 2.033007      | 2.031366      |
| FLYA13      | 1.931325      | 2.023249      | 2.023249      | 2.023249      | 2.023249      | 2.023249      | 2.182086      |
| HUP-T4      | 1.972064      | 2.183373      | 2.183373      | 2.183373      | 2.183373      | 2.183373      | 2.462853      |
| COR-L 105   | 2.132468      | 2.251725      | 2.320575      | 2.320575      | 2.350232      | 2.320575      | 2.251725      |
| KMRC-20     | 2.16531       | 2.333379      | 2.350449      | 2.350449      | 2.393617      | 2.393617      | 2.393617      |
| NCI-H2081   | 2.092801      | 2.092801      | 2.211008      | 2.397692      | 2.397692      | 2.463577      | 2.463577      |
| VM-CUB1     | 2.165746      | 2.198927      | 2.035944      | 2.198927      | 2.354739      | 2.354739      | 2.532578      |
| BU25 TK     | 2.282905      | 2.29009       | 2.29009       | 2.29009       | 2.282905      | 2.282905      | 2.217036      |
| RCM-1       | 1.842065      | 1.848869      | 1.848869      | 1.848869      | 1.848869      | 2.161261      | 2.509091      |
| NCI-H2172   | 2.230693      | 2.293714      | 2.293714      | 2.333971      | 2.333971      | 2.333971      | 2.293714      |
| SK-NEP-1    | 1.941163      | 2.244683      | 2.301574      | 2.301574      | 2.301574      | 2.378979      | 2.378979      |
| D1.1        | 2.279843      | 2.279843      | 2.260794      | 2.279843      | 2.260794      | 2.260794      | 2.19475       |
| NCI-H2196   | 2.140394      | 2.244378      | 2.244378      | 2.193374      | 2.193374      | 2.413574      | 2.431134      |
| NCI-H1435   | 1.898427      | 1.917121      | 2.009822      | 2.092577      | 2.092577      | 2.092577      | 2.092577      |
| GRANTA-519  | 1.804641      | 1.804641      | 1.864773      | 1.649764      | 1.649764      | 1.813981      | 1.944738      |
| SK-MES      | 2.306703      | 2.336886      | 2.370236      | 2.363401      | 2.363401      | 2.363401      | 2.363401      |
| NCI-H1437   | 2.248458      | 2.250628      | 2.248458      | 2.250628      | 2.250628      | 2.263218      | 2.26468       |
| BFTC-905    | 2.133832      | 2.243861      | 2.133832      | 2.133832      | 1.919496      | 1.919496      | 2.021316      |
| DMS 153     | 2.258751      | 2.258751      | 2.258751      | 2.108197      | 2.108197      | 2.108197      | 2.108197      |
| Detroit 562 | 2.108572      | 2.108572      | 2.209197      | 2.284552      | 2.28548       | 2.28548       | 2.28548       |
| RT4         | 1.959495      | 2.047064      | 2.047064      | 2.069854      | 2.069854      | 2.069854      | 2.047064      |
| 273T        | 2.118821      | 2.118821      | 2.118821      | 2.118821      | 2.238925      | 2.280484      | 2.280484      |
| SW 1463     | 2.148696      | 2.173568      | 2.213447      | 2.213447      | 2.330885      | 2.354164      | 2.354164      |
| H69         | 2.156017      | 2.156017      | 2.328916      | 2.328916      | 2.156017      | 2.156017      | 2.156017      |

| ProbeSetID      | SNP_A-1942958 | SNP_A-2108798 | SNP_A-2278627 | SNP_A-1932698 | SNP_A-1789168 | SNP_A-2267510 | SNP_A-1894491 |
|-----------------|---------------|---------------|---------------|---------------|---------------|---------------|---------------|
| Affy_SNP.ID     | 12448814      | 6811344       | 9418599       | 12306602      | 10155780      | 9252596       | 11748262      |
| dbSNP           | rs7795743     | rs6593210     | rs6970262     | rs17518446    | rs2293348     | rs10269512    | rs2293347     |
| Chromosome      | 7             | 7             | 7             | 7             | 7             | 7             | 7             |
| Position        | 55024339      | 55028395      | 55033972      | 55037176      | 55040966      | 55041369      | 55043125      |
| Strand          | -             | -             | +             | +             | +             | +             | +             |
| Cytoband        | p11.2         |
| Hs 195.T        | 1.799016      | 1.956948      | 2.155443      | 2.236919      | 2.236919      | 2.236919      | 2.112477      |
| NCI-H1781       | 2.171801      | 2.247319      | 2.247319      | 2.163688      | 2.163688      | 2.126868      | 2.026067      |
| WDR             | 2.162829      | 2.172046      | 2.223745      | 2.223745      | 2.223745      | 2.223745      | 2.162829      |
| SK-MEL-1        | 2.062084      | 1.906158      | 1.906158      | 1.906158      | 1.906158      | 1.906158      | 1.906158      |
| SUIT-2          | 1.838055      | 2.085219      | 2.085219      | 2.085219      | 2.085219      | 2.085219      | 2.085219      |
| WPE1-NB26       | 1.761136      | 2.073752      | 2.203354      | 2.203354      | 2.203354      | 2.203354      | 2.073752      |
| HCC-78          | 1.867009      | 2.201821      | 2.201821      | 2.201821      | 2.201821      | 2.201821      | 2.184347      |
| A549            | 2.035032      | 2.035032      | 2.035032      | 2.085975      | 2.161206      | 2.263679      | 2.263679      |
| LK-2            | 1.978147      | 2.127061      | 2.127586      | 2.127586      | 2.127061      | 2.127061      | 2.127061      |
| NCI-H2330       | 2.156509      | 2.224546      | 2.224546      | 2.224546      | 2.311498      | 2.311498      | 1.897919      |
| COLO 685        | 2.019726      | 2.019726      | 2.019726      | 2.072571      | 2.239868      | 2.251765      | 2.251765      |
| BICR22          | 2.184063      | 2.289111      | 2.289111      | 2.210753      | 2.210753      | 2.303224      | 2.308816      |
| MEWO            | 2.036371      | 2.036371      | 2.020271      | 2.020271      | 1.94025       | 2.020271      | 2.036371      |
| IHH-4           | 2.100181      | 2.182411      | 2.185944      | 2.185944      | 2.185944      | 2.185944      | 2.376181      |
| NCI-N87         | 2.247822      | 2.247822      | 2.247822      | 2.344745      | 2.436657      | 2.453313      | 2.453313      |
| KYSE-410        | 2.134727      | 2.148257      | 2.151736      | 2.151736      | 2.148257      | 2.151736      | 2.151736      |
| DMS 92          | 1.636081      | 1.656093      | 1.656093      | 1.702063      | 1.702063      | 1.859567      | 2.315006      |
| RO82-W-1        | 2.004411      | 2.010139      | 2.010139      | 2.010139      | 2.004411      | 2.004411      | 1.691068      |
| NCI-H82         | 1.966903      | 1.966903      | 1.966903      | 1.991649      | 1.991649      | 2.046809      | 2.046809      |
| C32             | 1.797686      | 1.884015      | 1.884015      | 1.929522      | 1.929522      | 1.963939      | 1.963939      |
| Hs 633T         | 2.104526      | 2.124078      | 2.104526      | 2.104526      | 2.104526      | 2.104526      | 2.07167       |
| NCI-H2405       | 1.937671      | 1.937877      | 2.129959      | 2.161384      | 2.161384      | 2.269822      | 2.269822      |
| Hs 895.T        | 2.092898      | 2.200825      | 2.200825      | 2.225307      | 2.225307      | 2.243079      | 2.225307      |
| MG 63           | 2.179905      | 2.184537      | 2.184537      | 2.184537      | 2.226801      | 2.226801      | 2.238885      |
| CAL-120         | 1.892219      | 1.994527      | 2.080522      | 2.080522      | 1.892219      | 1.892219      | 2.080522      |
| H33HJ-JA1       | 2.006183      | 2.006183      | 2.006183      | 2.006183      | 1.885757      | 1.943267      | 1.943267      |
| JSC-1           | 1.990434      | 2.008499      | 2.078136      | 2.086395      | 2.165337      | 2.241646      | 2.280458      |
| Hs 751.T        | 1.794977      | 1.893087      | 1.893087      | 1.893087      | 1.893087      | 1.794977      | 1.794977      |
| HMVII           | 1.72518       | 1.72518       | 1.72518       | 1.775175      | 1.775175      | 1.836803      | 1.836803      |
| fR2             | 1.664549      | 1.854655      | 1.854655      | 1.854655      | 1.854655      | 1.854655      | 1.854655      |
| COLO 201        | 1.962785      | 1.962785      | 2.076465      | 2.076465      | 2.092619      | 2.092619      | 2.092619      |
| NCI-H1915       | 1.828272      | 1.90729       | 1.90729       | 2.014764      | 2.014764      | 2.045176      | 2.163266      |
| IMR-90          | 1.459358      | 1.615237      | 1.615237      | 1.615237      | 1.615237      | 2.043201      | 2.080901      |
| RT112/84        | 1.749311      | 1.808945      | 1.808945      | 1.808945      | 1.808945      | 1.808945      | 1.808945      |
| Hs 894(E).Lu    | 2.077378      | 2.077378      | 2.077378      | 2.077378      | 2.177572      | 2.177572      | 2.043826      |
| LNCaP clone FGC | 2.051674      | 2.185957      | 2.185957      | 2.216045      | 2.256178      | 2.318858      | 2.256178      |
| NCI-H1581       | 2.002797      | 2.002797      | 2.054393      | 2.054393      | 2.099498      | 2.129283      | 2.129283      |
| HCT 116         | 2.071572      | 2.071572      | 2.160074      | 2.160074      | 2.160074      | 2.160074      | 2.160074      |
| Hs 228.T        | 1.944797      | 2.134038      | 2.214572      | 2.214572      | 2.134038      | 2.134038      | 2.003403      |
| JURKAT EC-1     | 2.000563      | 2.000563      | 2.000563      | 1.89412       | 1.89412       | 1.934647      | 1.934647      |
| SK-N-BE(2)      | 2.096877      | 2.120275      | 2.120275      | 2.125418      | 2.153501      | 2.153501      | 2.125418      |
| LS180           | 2.029767      | 2.029767      | 2.093401      | 2.062282      | 2.020786      | 2.062282      | 2.050625      |
| CAL-51          | 1.772086      | 1.819224      | 2.092144      | 2.092144      | 2.092144      | 2.092144      | 2.181165      |
| SKG-IIIb        | 1.21404       | 1.295495      | 1.295495      | 1.295495      | 1.295495      | 1.797639      | 1.82036       |
| P116 T          | 1.870482      | 2.025981      | 2.025981      | 2.02621       | 2.059174      | 2.059174      | 2.106306      |
| Hs 417.Lu       | 1.952229      | 1.952229      | 1.939734      | 1.952229      | 1.952229      | 1.963369      | 1.939734      |
| WIL2 NS         | 2.081925      | 2.081925      | 2.081925      | 2.086241      | 2.152639      | 2.209197      | 2.209197      |

| ProbeSetID  | SNP_A-1942958 | SNP_A-2108798 | SNP_A-2278627 | SNP_A-1932698 | SNP_A-1789168 | SNP_A-2267510 | SNP_A-1894491 |
|-------------|---------------|---------------|---------------|---------------|---------------|---------------|---------------|
| Affy_SNP.ID | 12448814      | 6811344       | 9418599       | 12306602      | 10155780      | 9252596       | 11748262      |
| dbSNP       | rs7795743     | rs6593210     | rs6970262     | rs17518446    | rs2293348     | rs10269512    | rs2293347     |
| Chromosome  | 7             | 7             | 7             | 7             | 7             | 7             | 7             |
| Position    | 55024339      | 55028395      | 55033972      | 55037176      | 55040966      | 55041369      | 55043125      |
| Strand      | -             | -             | +             | +             | +             | +             | +             |
| Cytoband    | p11.2         |
| COR-L95     | 2.037368      | 2.037368      | 2.037368      | 2.091655      | 2.091655      | 2.091655      | 2.037368      |
| SK-N-FI     | 1.756132      | 1.774692      | 2.083187      | 2.090536      | 2.175944      | 2.175944      | 2.175944      |
| WILCL       | 1.935119      | 1.935119      | 1.970666      | 2.204806      | 2.204806      | 2.204806      | 2.204806      |
| P32/ISH     | 1.986001      | 2.003403      | 2.003403      | 2.021746      | 2.021746      | 2.021746      | 2.399916      |
| EPLC-272H   | 1.610255      | 1.898846      | 1.898846      | 1.784502      | 1.784502      | 1.898846      | 2.011691      |
| A2780 ADR   | 1.744349      | 1.744349      | 1.857885      | 2.0519        | 2.0909        | 2.0909        | 2.0519        |
| C8166       | 1.97582       | 2.057591      | 2.057591      | 2.063778      | 2.283376      | 2.283376      | 2.283376      |
| Hs 908.T    | 1.973244      | 1.973244      | 1.973244      | 1.988754      | 1.988754      | 2.344873      | 2.337746      |
| NCI-H322    | 1.846024      | 1.846024      | 1.846024      | 1.984087      | 1.846024      | 1.822739      | 1.846024      |
| NCI-H1417   | 1.652987      | 1.597926      | 1.597926      | 1.652987      | 1.652987      | 1.742315      | 1.742315      |
| HBE4-E6/E7  | 1.805521      | 1.891021      | 1.891021      | 1.891021      | 1.891021      | 2.031751      | 2.100293      |
| NCI-H1522   | 1.67921       | 1.7155        | 1.7155        | 1.7155        | 2.170428      | 2.170428      | 2.170428      |
| LU99A       | 2.057138      | 2.099262      | 2.099262      | 2.168129      | 2.057138      | 2.057138      | 1.882213      |
| HCT-8       | 1.997763      | 1.997763      | 1.949998      | 1.949998      | 1.949998      | 1.949998      | 2.033863      |
| SBC-5       | 1.961557      | 2.052538      | 2.052538      | 2.052538      | 2.10376       | 2.10376       | 2.10376       |
| Ishikawa    | 1.972341      | 1.974802      | 1.972341      | 1.974802      | 1.974802      | 1.974802      | 1.974802      |
| U266B1      | 2.049136      | 2.049136      | 2.014377      | 2.014377      | 2.014377      | 2.014377      | 1.966465      |
| PA-TU-8988T | 1.651734      | 1.942208      | 1.942208      | 1.942208      | 1.942208      | 1.942208      | 1.942208      |
| HRT-18      | 1.676177      | 1.738448      | 1.738448      | 1.738448      | 1.738448      | 1.738448      | 1.738448      |
| C170        | 1.932418      | 1.965516      | 2.000058      | 2.000058      | 2.000058      | 2.132192      | 2.132192      |
| J GAMMA 1   | 2.044622      | 2.044622      | 2.044622      | 2.044622      | 1.996853      | 1.964027      | 1.996853      |
| LS174T      | 1.974656      | 1.974656      | 1.94712       | 1.94712       | 1.94712       | 1.974656      | 1.94712       |
| NCI-H526    | 1.966202      | 2.021918      | 2.087039      | 2.089208      | 2.113777      | 2.113777      | 2.113777      |
| HLE         | 1.617495      | 1.741637      | 1.814781      | 1.814781      | 1.741637      | 1.741637      | 1.814781      |
| 23132/87    | 1.61471       | 1.61471       | 1.867145      | 2.208673      | 2.208673      | 2.208673      | 2.208673      |
| Hs 834.T    | 1.838878      | 1.991128      | 2.056473      | 2.056473      | 2.33311       | 2.33311       | 2.088522      |
| Hs 891.T    | 1.810424      | 1.810424      | 1.921157      | 2.072458      | 2.072458      | 2.107099      | 2.072458      |
| Hs 839.T    | 1.166692      | 1.443568      | 1.443568      | 1.325869      | 1.325869      | 1.443568      | 1.590819      |
| SNU-1       | 2.031652      | 2.031652      | 2.057676      | 2.241009      | 2.057676      | 2.057676      | 2.278926      |
| EB1         | 2.052226      | 2.164002      | 2.052226      | 2.164002      | 2.164002      | 2.164002      | 2.164002      |
| NCI-H2009   | 1.78136       | 1.835337      | 1.835337      | 1.922239      | 1.922239      | 1.960197      | 1.960197      |
| NCI-H1048   | 1.822202      | 1.822202      | 1.822202      | 1.994339      | 1.994339      | 2.135966      | 2.135966      |
| A2780       | 1.937641      | 1.947913      | 1.972341      | 2.080214      | 2.080214      | 2.080214      | 1.947913      |
| NCI-H1666   | 2.208673      | 2.099262      | 2.099262      | 2.208673      | 2.099262      | 2.168129      | 2.099262      |
| G-402       | 1.718269      | 1.770852      | 1.770852      | 1.770852      | 1.770852      | 1.770852      | 2.045247      |
| JHH-7       | 1.661971      | 1.661971      | 1.661971      | 1.871221      | 1.871221      | 2.021989      | 2.201579      |
| OUS-11      | 1.688964      | 2.095105      | 2.095105      | 2.095105      | 2.095105      | 2.268784      | 2.268784      |
| AZ-521      | 1.814335      | 1.814335      | 1.814335      | 1.953739      | 2.374965      | 2.374965      | 2.374965      |
| K562/ADM    | 1.33344       | 1.33344       | 1.33344       | 1.33344       | 1.33344       | 2.15439       | 2.15439       |
| NCI-H889    | 1.828073      | 1.910581      | 1.910581      | 1.972603      | 1.972603      | 1.972603      | 1.910581      |
| OE19        | 1.797794      | 1.755159      | 1.755159      | 1.901713      | 2.072008      | 2.152995      | 2.19363       |
| HT 728.T    | 2.055115      | 2.075397      | 2.075397      | 2.075397      | 2.142001      | 2.258276      | 2.258276      |
| GA-10       | 1.98587       | 1.98587       | 1.967487      | 1.967487      | 1.967487      | 1.967487      | 1.98587       |
| Hs 737.T    | 1.949191      | 1.949191      | 1.96947       | 1.96947       | 2.034404      | 2.034404      | 2.040343      |
| NCI-H838    | 1.758925      | 1.882333      | 1.882333      | 1.91724       | 1.91724       | 1.91724       | 1.972938      |
| NCI-H1155   | 1.929477      | 1.934957      | 1.929477      | 2.004397      | 2.128731      | 2.128731      | 2.128731      |
| A2780cis    | 1.763768      | 1.782278      | 1.916349      | 2.204214      | 1.916349      | 2.204214      | 2.204214      |

| ProbeSetID                 | SNP_A-1942958 | SNP_A-2108798 | SNP_A-2278625 | SNP_A-1932695 | SNP_A-1789168 | SNP_A-2267510 | SNP_A-1894491 |
|----------------------------|---------------|---------------|---------------|---------------|---------------|---------------|---------------|
| Affy_SNP.ID                | 12448814      | 6811344       | 9418599       | 12306602      | 10155780      | 9252596       | 11748262      |
| dbSNP                      | rs7795743     | rs6593210     | rs6970262     | rs17518446    | rs2293348     | rs10269512    | rs2293347     |
| Chromosome                 | 7             | 7             | 7             | 7             | 7             | 7             | 7             |
| Position                   | 55024339      | 55028395      | 55033972      | 55037176      | 55040966      | 55041369      | 55043125      |
| Strand                     | -             | -             | +             | +             | +             | +             | +             |
| Cytoband                   | p11.2         |
| G-401                      | 1.593395      | 1.982084      | 1.982084      | 1.982084      | 1.831271      | 1.831271      | 1.982084      |
| MS-1-L                     | 1.638846      | 2.20244       | 2.20244       | 1.638846      | 1.573126      | 1.638846      | 1.779663      |
| Hs 746T                    | 1.682223      | 1.641836      | 1.641836      | 1.797345      | 1.797345      | 1.932551      | 1.797345      |
| SW 13                      | 1.948559      | 1.948559      | 1.957504      | 1.95828       | 1.903399      | 1.903399      | 1.903399      |
| AGS                        | 1.835276      | 1.837643      | 1.837643      | 2.154677      | 2.163116      | 2.192213      | 2.192213      |
| NCI-H2171                  | 1.578423      | 1.767414      | 1.89759       | 1.997936      | 2.104651      | 2.104651      | 2.096849      |
| Hs 573.T                   | 1.683012      | 1.809099      | 2.076535      | 2.076535      | 2.076535      | 2.083523      | 2.076535      |
| HT1080                     | 1.917626      | 1.917626      | 1.917626      | 1.917626      | 1.917626      | 1.992908      | 1.992908      |
| COR-L 23/CPR               | 1.875111      | 1.875111      | 1.875111      | 1.98545       | 1.98545       | 2.075425      | 2.075425      |
| HGC-27                     | 1.601522      | 2.029767      | 1.982519      | 1.982519      | 1.601522      | 1.601522      | 1.63932       |
| SBC-3                      | 1.81675       | 1.924757      | 1.924757      | 1.924757      | 2.094979      | 2.094979      | 2.094979      |
| COLO 792                   | 1.677516      | 1.693749      | 1.693749      | 1.693749      | 1.693749      | 1.697789      | 1.69995       |
| H-EMC-SS                   | 1.502876      | 1.502876      | 1.502876      | 1.502876      | 1.502876      | 1.443603      | 2.027625      |
| J82                        | 1.433789      | 1.495497      | 1.495497      | 1.495497      | 1.495497      | 1.570666      | 1.616737      |
| Hs 600.T                   | 1.878814      | 1.963369      | 2.233222      | 2.067516      | 1.878814      | 1.830629      | 1.830629      |
| Hs 781.T                   | 1.699102      | 1.855626      | 1.855626      | 1.855626      | 1.699102      | 1.791955      | 1.699102      |
| BPH-1                      | 1.827414      | 1.880394      | 1.894345      | 2.029111      | 2.040087      | 2.128179      | 2.128179      |
| COR-L23                    | 1.637717      | 1.696891      | 1.696891      | 1.878047      | 1.878047      | 1.878047      | 1.696891      |
| A673                       | 1.916587      | 1.916587      | 1.916587      | 2.006701      | 2.21275       | 2.21275       | 2.21275       |
| COLO 205                   | 1.849826      | 1.849826      | 1.849826      | 1.849826      | 1.849826      | 1.849826      | 1.849826      |
| RMG-I                      | 1.312974      | 1.431506      | 1.431506      | 1.419534      | 1.419534      | 1.431506      | 1.745547      |
| WI-26 VA4                  | 1.8475        | 1.8475        | 1.817949      | 1.8475        | 1.892818      | 2.100488      | 2.11997       |
| Eos-HL-60                  | 1.740422      | 1.865891      | 1.740422      | 1.730191      | 1.640415      | 1.713764      | 1.730191      |
| GP5D                       | 1.824748      | 1.824748      | 1.85253       | 1.844487      | 1.824748      | 1.844487      | 1.85253       |
| MES-SA/Dx-5                | 1.658839      | 1.614825      | 1.614825      | 1.658839      | 1.688964      | 1.8738        | 1.958807      |
| SBC-2                      | 1.845355      | 1.845355      | 1.845355      | 1.845355      | 1.845355      | 1.845355      | 1.831715      |
| MCAS                       | 1.229853      | 1.687759      | 1.687759      | 1.687759      | 1.467004      | 1.467004      | 1.687759      |
| Ishikawa (Heraklio) 02 ER- | 1.598722      | 1.621215      | 1.621215      | 1.746209      | 1.746209      | 1.767023      | 1.897202      |
| MOLT-4F                    | 1.328055      | 1.328055      | 1.328055      | 1.328055      | 1.328055      | 1.910596      | 1.960899      |
| HARA                       | 1.828838      | 1.839077      | 1.839077      | 1.828838      | 1.828838      | 1.828838      | 1.676806      |
| NCI-H1944                  | 1.557056      | 1.557056      | 1.557056      | 1.765161      | 1.765161      | 1.820729      | 2.029696      |
| BICR 31                    | 1.834161      | 1.834161      | 1.820084      | 1.820084      | 1.800455      | 1.800455      | 1.800455      |
| D341 Med                   | 1.86155       | 1.86155       | 1.707305      | 1.720146      | 1.720146      | 1.720146      | 1.720146      |
| KHM-3S                     | 1.593262      | 1.593262      | 1.593262      | 1.758423      | 1.758423      | 1.830353      | 1.830353      |
| COR-L88                    | 1.881687      | 1.818932      | 1.849674      | 1.881687      | 1.904488      | 1.904488      | 1.854564      |
| NCI-H358                   | 1.535903      | 1.618022      | 1.618022      | 1.810733      | 1.810733      | 1.900534      | 2.015568      |
| 1321N                      | 1.413247      | 1.520919      | 1.520919      | 1.520919      | 1.520919      | 1.520919      | 1.426987      |
| KYSE-510                   | 1.582295      | 1.582295      | 1.582295      | 1.923602      | 1.923602      | 1.923602      | 1.923602      |
| TCO-1                      | 1.432718      | 1.432718      | 1.432718      | 1.432718      | 1.432718      | 1.503767      | 1.529881      |
| NCI-H441                   | 1.525735      | 1.692289      | 1.692289      | 1.692289      | 1.692289      | 1.525735      | 1.746209      |
| SNU-398                    | 1.544988      | 1.546896      | 1.546896      | 1.546896      | 1.544988      | 1.544988      | 1.544988      |
| NCI-H1299                  | 1.515344      | 1.610634      | 1.704797      | 1.752456      | 1.610634      | 1.610634      | 1.752456      |
| ASH-3                      | 0.9018576     | 0.9018576     | 0.9018576     | 0.9018576     | 0.9018576     | 0.9293574     | 1.0402108     |
| MCF7                       | 1.169925      | 1.227063      | 1.264536      | 1.598175      | 1.598175      | 1.598175      | 1.598175      |
| SKOV3                      | 0.7545363     | 0.7545363     | 0.7545363     | 0.9342876     | 0.8522504     | 0.9069193     | 0.9342876     |
| ChaGo-K-1                  | 1.1272925     | 0.9341206     | 0.9341206     | 0.9341206     | 0.9341206     | 1.1272925     | 1.220304      |
| A373 C6                    | 0.869123      | 0.869123      | 0.9306744     | 0.9306744     | 0.9306744     | 0.9306744     | 1.2244407     |

| ProbeSetID  | SNP_A-1942958 | SNP_A-2108798 | SNP_A-2278627 | SNP_A-1932698 | SNP_A-1789168 | SNP_A-2267510 | SNP_A-1894491 |
|-------------|---------------|---------------|---------------|---------------|---------------|---------------|---------------|
| Affy.SNP.ID | 12448814      | 6811344       | 9418599       | 12306602      | 10155780      | 9252596       | 11748262      |
| dbSNP       | rs7795743     | rs6593210     | rs6970262     | rs17518446    | rs2293348     | rs10269512    | rs2293347     |
| Chromosome  | 7             | 7             | 7             | 7             | 7             | 7             | 7             |
| Position    | 55024339      | 55028395      | 55033972      | 55037176      | 55040966      | 55041369      | 55043125      |
| Strand      | -             | -             | +             | +             | +             | +             | +             |
| Cytoband    | p11.2         |
| MES-SA      | 0.6719725     | 0.6719725     | 0.7540253     | 0.8882739     | 0.8882739     | 0.7540253     | 0.8882739     |
| OAW28       | 0.4894576     | 0.4894576     | 0.4894576     | 0.8394229     | 0.8394229     | 0.8394229     | 0.8818619     |
| NCI-H460    | 0.6580405     | 0.4669172     | 0.4669172     | 0.6580405     | 0.6580405     | 0.6580405     | 0.7038671     |
