# Supplementary material
Source: PubMed Central journal article supplement (PMC2148401)
Supplement: pnas_0707498104_13.pdf [file pnas_0707498104_13.pdf]

|                     |           |       |       |       |       |       |       |       |       |       |       |       |       |       |       |
|---------------------|-----------|-------|-------|-------|-------|-------|-------|-------|-------|-------|-------|-------|-------|-------|-------|
| VMRC-RCW            | Kidney    | 0.71  | 0.719 | 0.804 | 0.695 | 0.953 | 0.676 | 0.72  | 0.891 | 0.823 | 1.07  | 1.169 | 0.569 |       |       |
| VMRC-RCZ            | Kidney    | 0.648 | 0.741 | 0.772 | 0.725 | 1.134 | 0.677 | 0.69  | 1.008 | 0.898 | 1.275 | 1.456 | 0.579 |       |       |
| WI-26 VA4           | Lung      | 1.036 | 0.939 | 0.916 | 0.991 | 0.136 | 0.913 | 0.674 | 0.961 | 0.88  | 0.769 | 0.937 | 0.857 | 0.978 | 0.687 |
| WI-38 VA13 sub 2 RA | Lung      | 1.008 | 0.958 | 0.935 | 0.93  | 0.818 | 0.843 | 0.917 | 1.034 | 1.02  | 0.849 | 0.994 | 0.961 | 0.959 | 0.807 |
| WiDr                | Intestine | 1.044 | 0.784 | 1.095 | 1.029 | 0.9   | 1.153 | 0.98  | 0.918 | 0.951 | 1.258 | 0.964 | 0.758 |       |       |
| WM 266-4            | Skin      | 1.05  | 0.489 | 1.045 | 1.088 | 0.837 | 0.964 | 0.838 | 1.064 | 1.006 | 1.037 | 0.978 | 0.902 |       |       |
| WM1552C             | Skin      | 0.807 | 0.94  | 0.902 | 0.855 | 0.72  | 0.864 | 0.78  | 1.072 | 0.83  | 1.085 | 0.865 | 1.008 | 0.96  | 0.644 |
| WM278               | Skin      | 0.834 | 0.528 | 1.027 | 0.904 | 0.802 | 0.777 | 0.884 | 1.012 | 0.968 | 0.938 | 0.917 | 0.797 | 1.032 | 0.375 |
| WM35                | Skin      | 1.031 | 0.672 | 1.093 | 1.009 | 0.876 | 0.955 | 0.898 | 0.911 | 0.792 | 1.117 | 0.955 | 0.946 |       |       |
| WM793B              | Skin      | 0.986 | 0.519 | 0.983 | 1.063 | 0.913 | 0.898 | 0.844 | 0.836 | 0.933 | 0.926 | 0.983 | 0.775 | 0.909 |       |
| YAPC                | Pancreas  | 0.712 | 0.844 | 0.801 | 0.939 | 0.831 | 0.834 | 0.333 | 1.133 | 0.796 | 1.083 | 1.046 | 0.9   | 0.779 | 0.766 |
| YKG-1               | Brain     | 1.022 | 0.816 | 0.916 | 0.933 | 0.719 | 0.691 | 0.619 | 0.898 | 1.001 | 0.764 | 1.129 | 0.692 |       |       |
| ZR-75-1             | Breast    | 0.617 | 0.858 | 1.04  | 0.952 | 1.35  | 1.108 | 1.129 | 0.919 | 1.036 | 1.014 | 0.878 | 0.51  |       |       |
| ZR-75-30            | Breast    | 0.778 | 1.126 | 1.095 | 0.838 | 0.946 | 0.693 | 0.823 | 0.963 | 0.978 | 0.919 | 0.988 | 0.862 | 0.982 | 0.687 |
