# Supplementary material
Source: PubMed Central journal article supplement (PMC2148401)

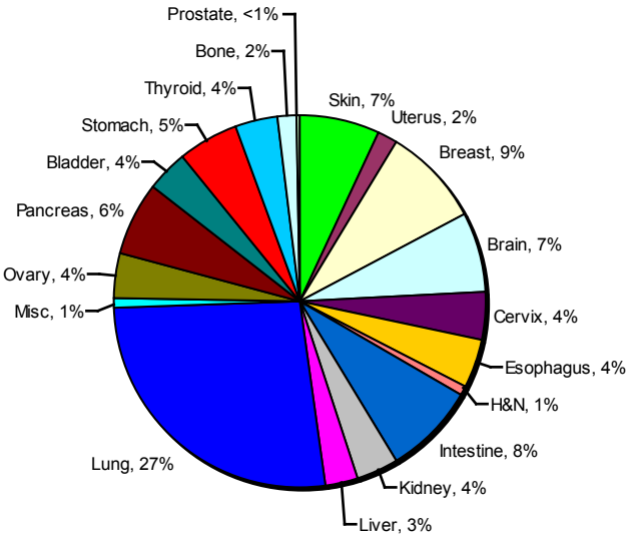

Supplement: pnas_0707498104_1.pdf [file pnas_0707498104_1.pdf]

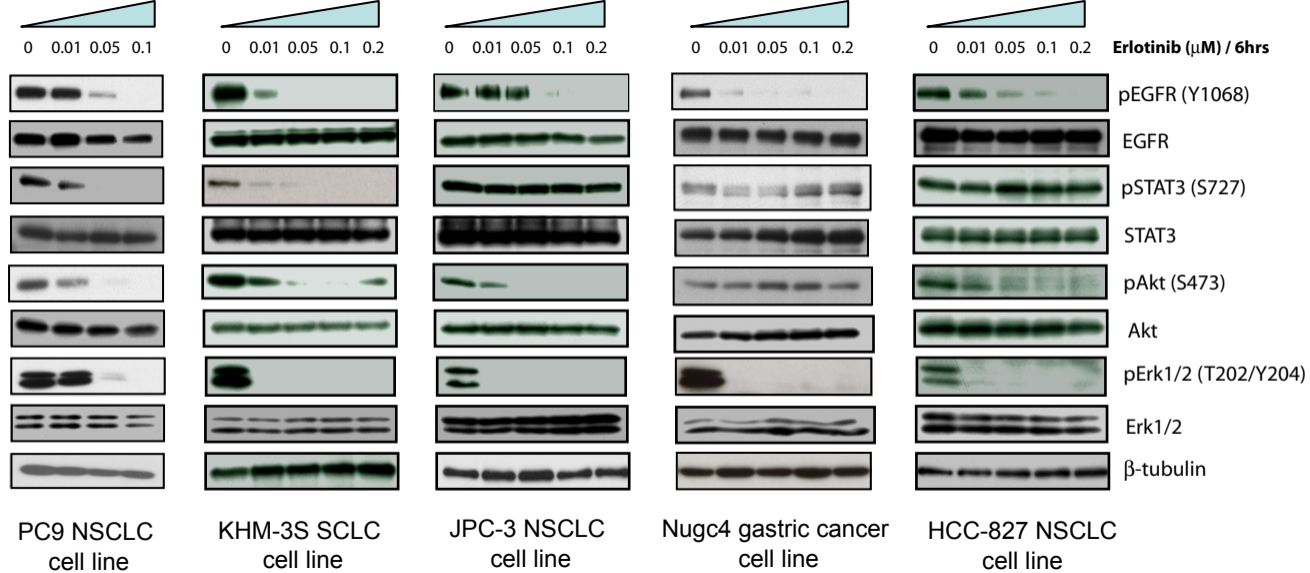

Supplement: pnas_0707498104_2.pdf [file pnas_0707498104_2.pdf]

A.

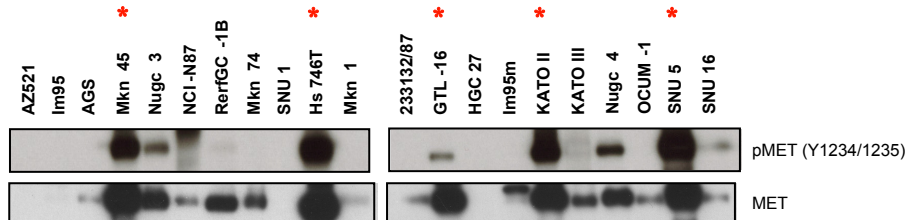

B.

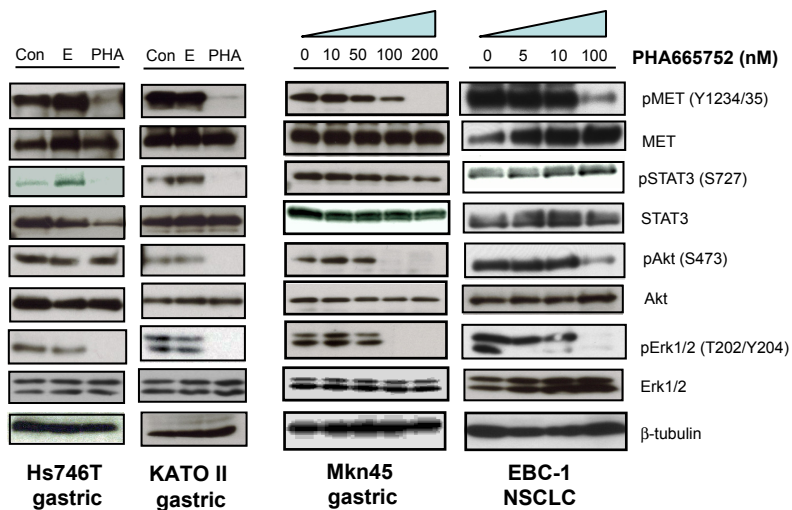

C.

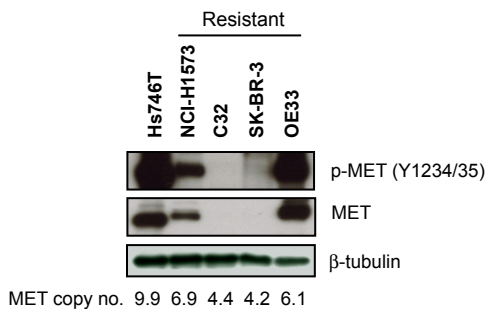

D.

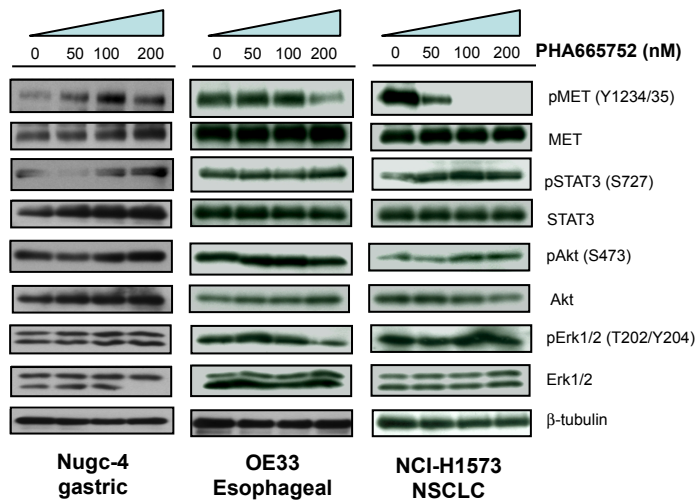

Supplement: pnas_0707498104_3.pdf [file pnas_0707498104_3.pdf]

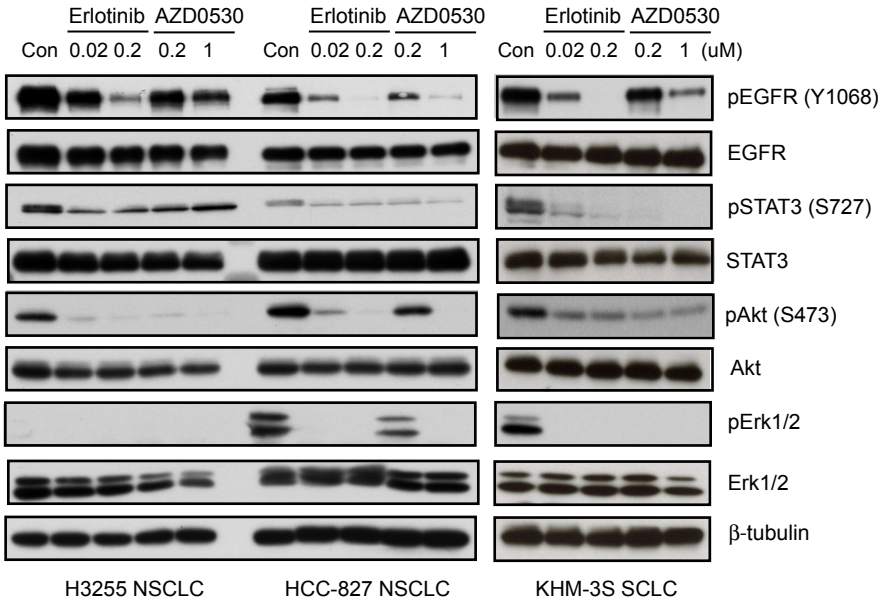

Supplement: pnas_0707498104_5.pdf [file pnas_0707498104_5.pdf]

A.

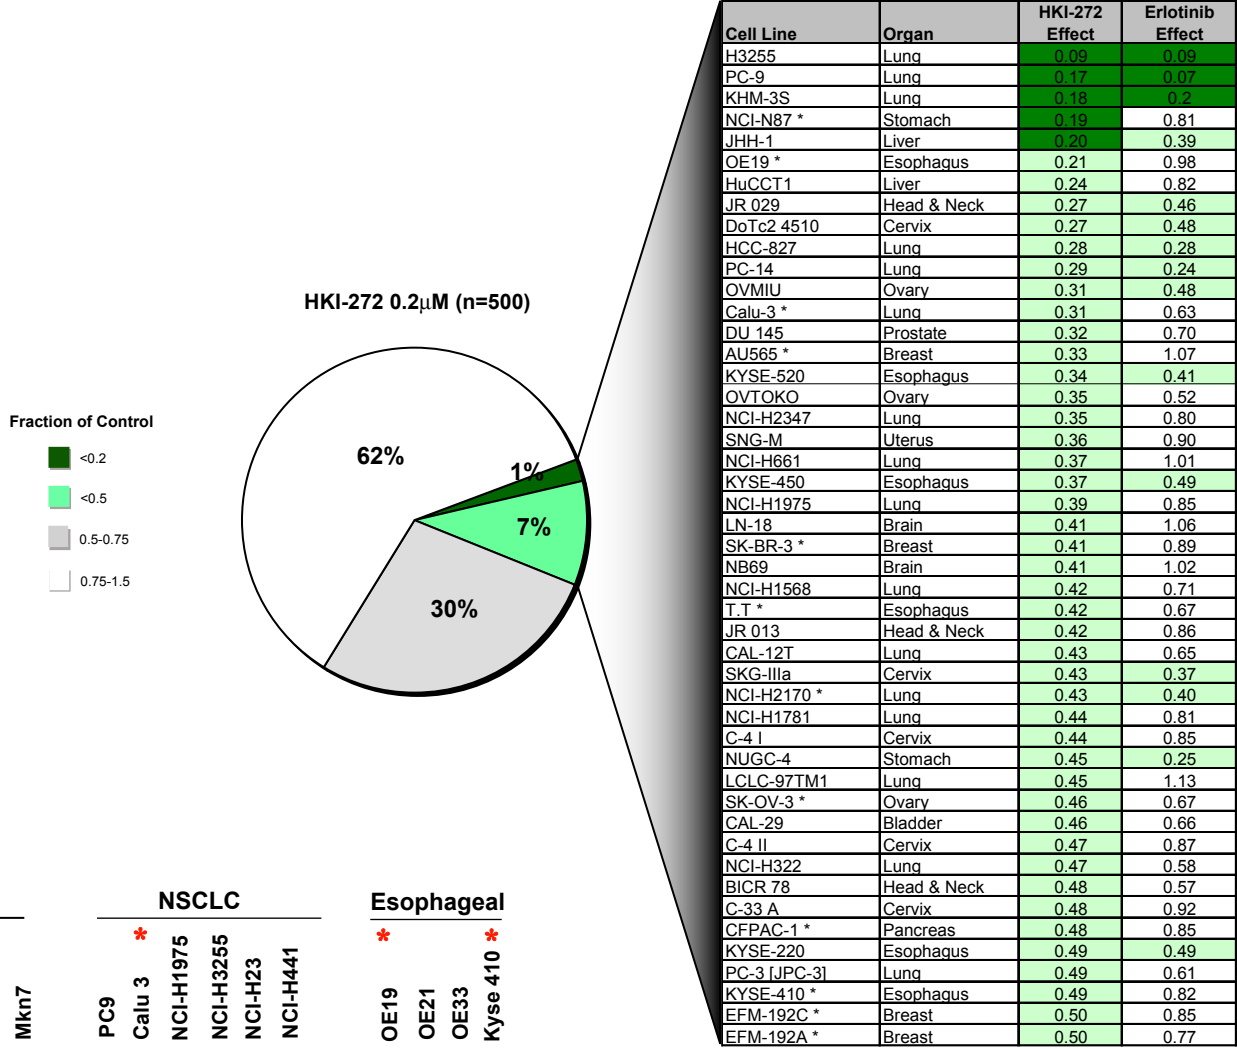

B.

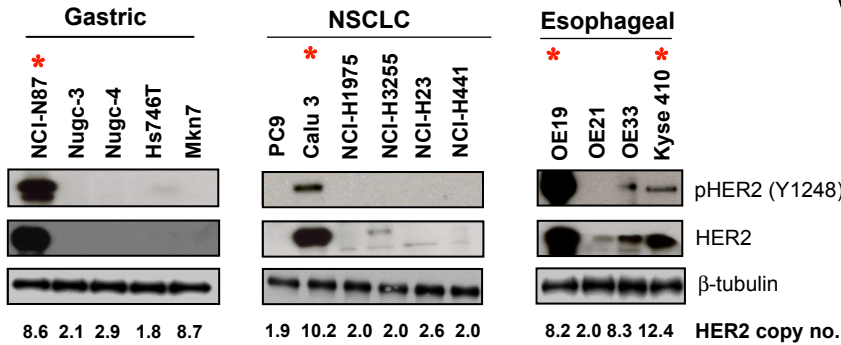

C.

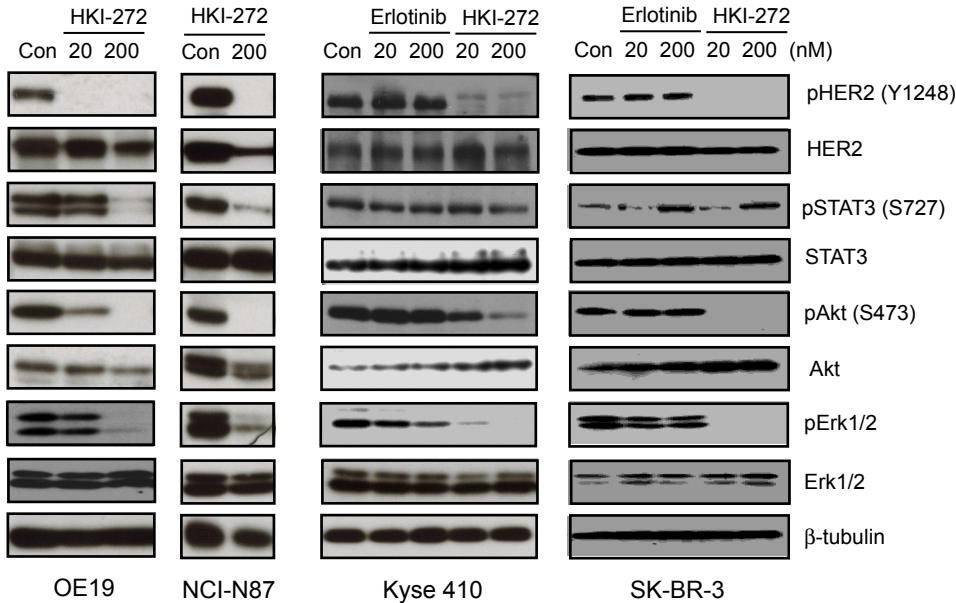

Supplement: pnas_0707498104_6.pdf [file pnas_0707498104_6.pdf]
